# Supplementary material for: Environment-dependent pleiotropic effects of mutations on the maximum growth rate r and carrying capacity K of population growth
Source: PubMed Central journal article supplement (PMC6364931; doi:10.1371/journal.pbio.3000121), 2019-01-25

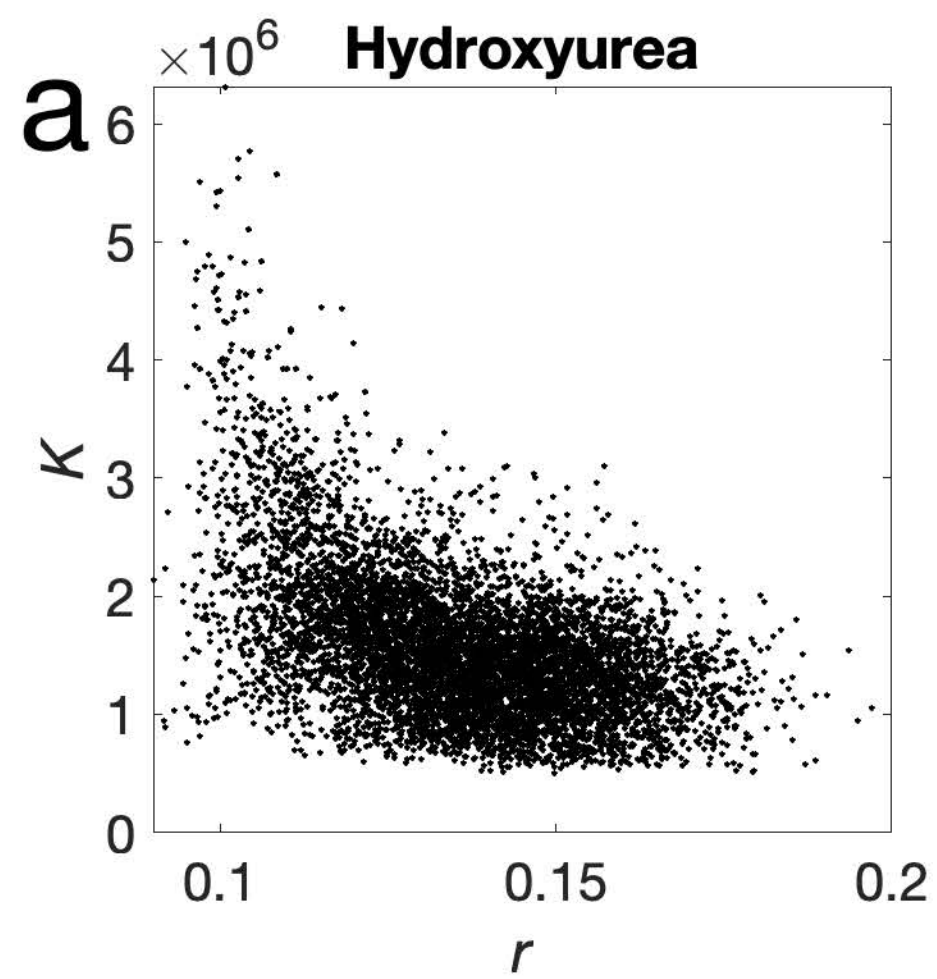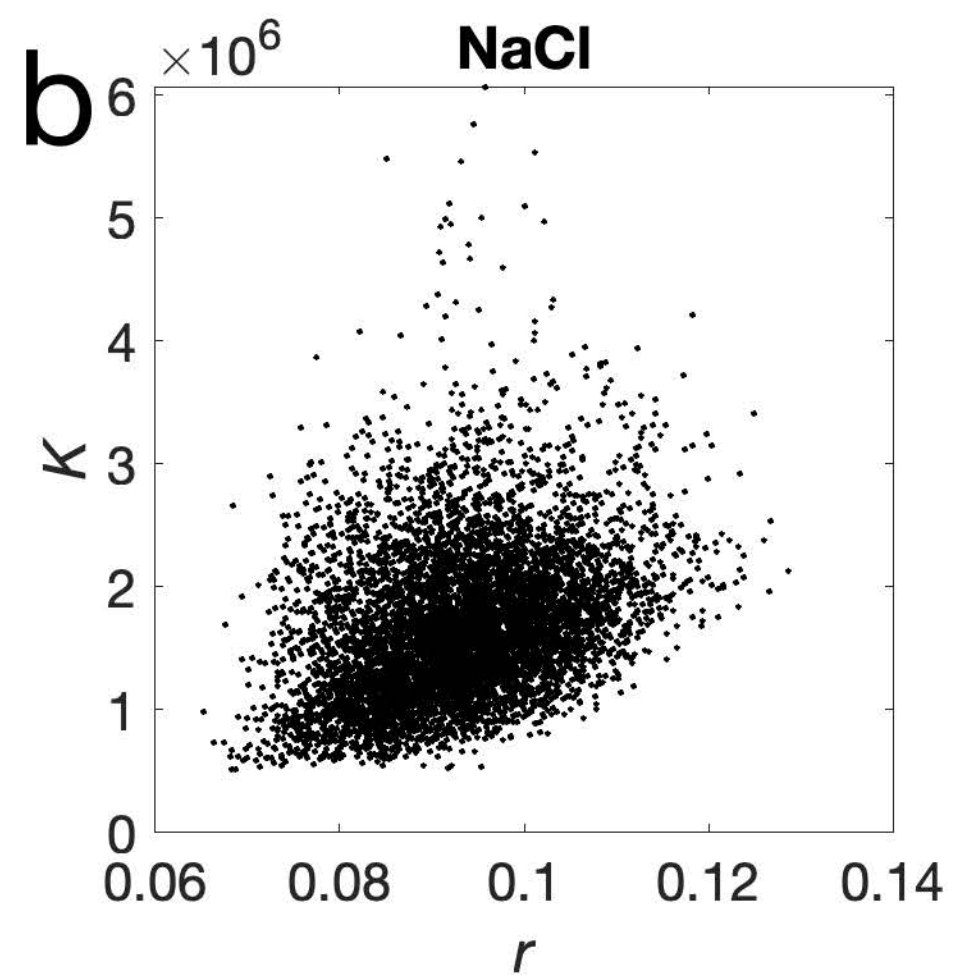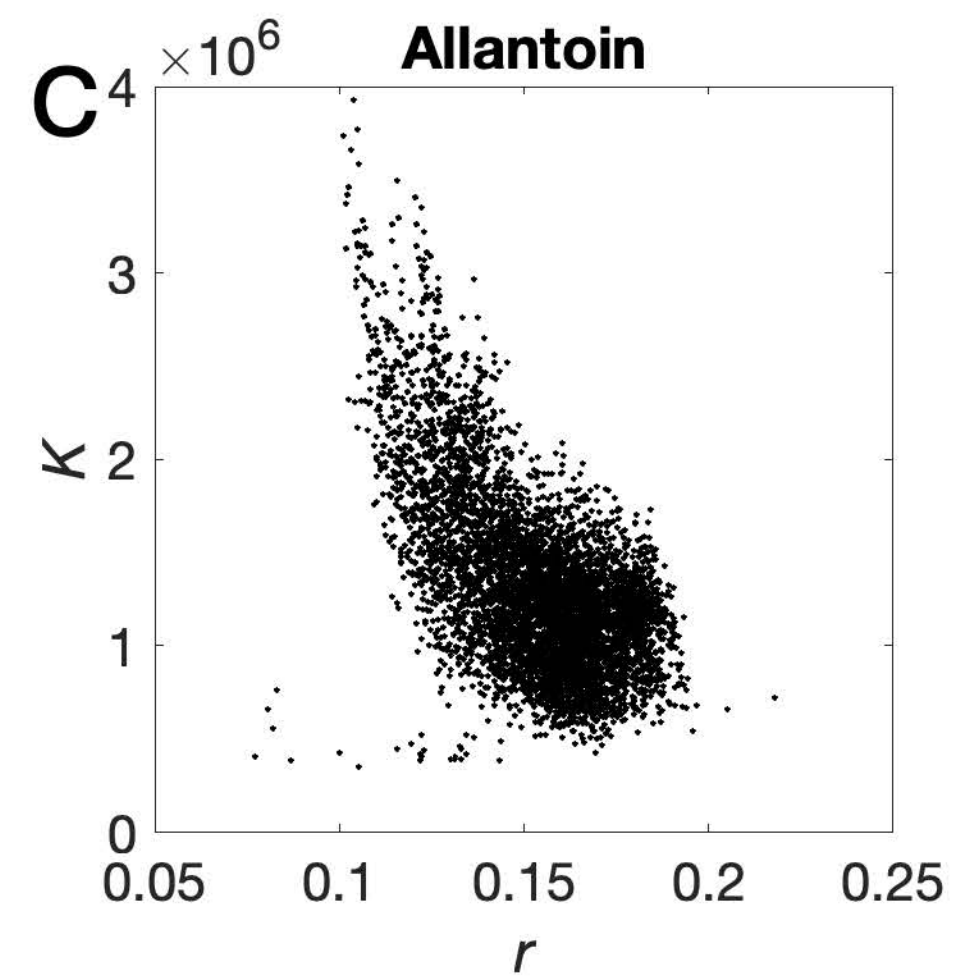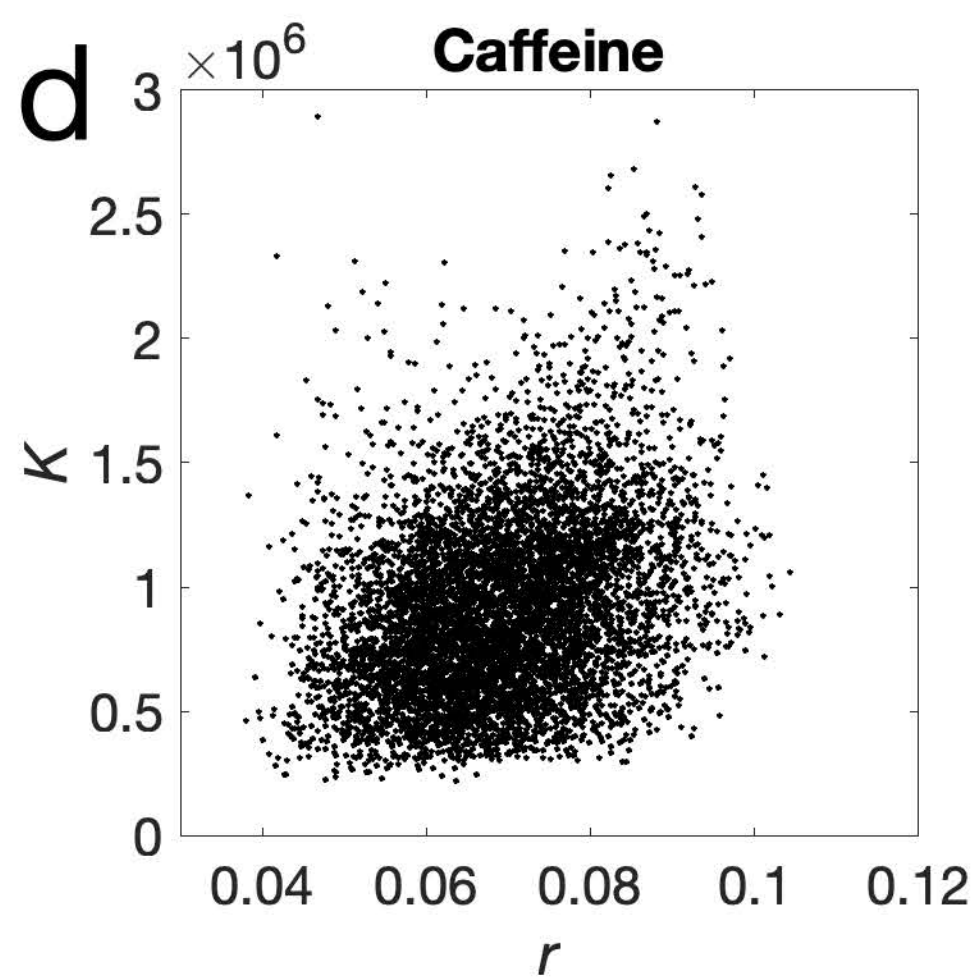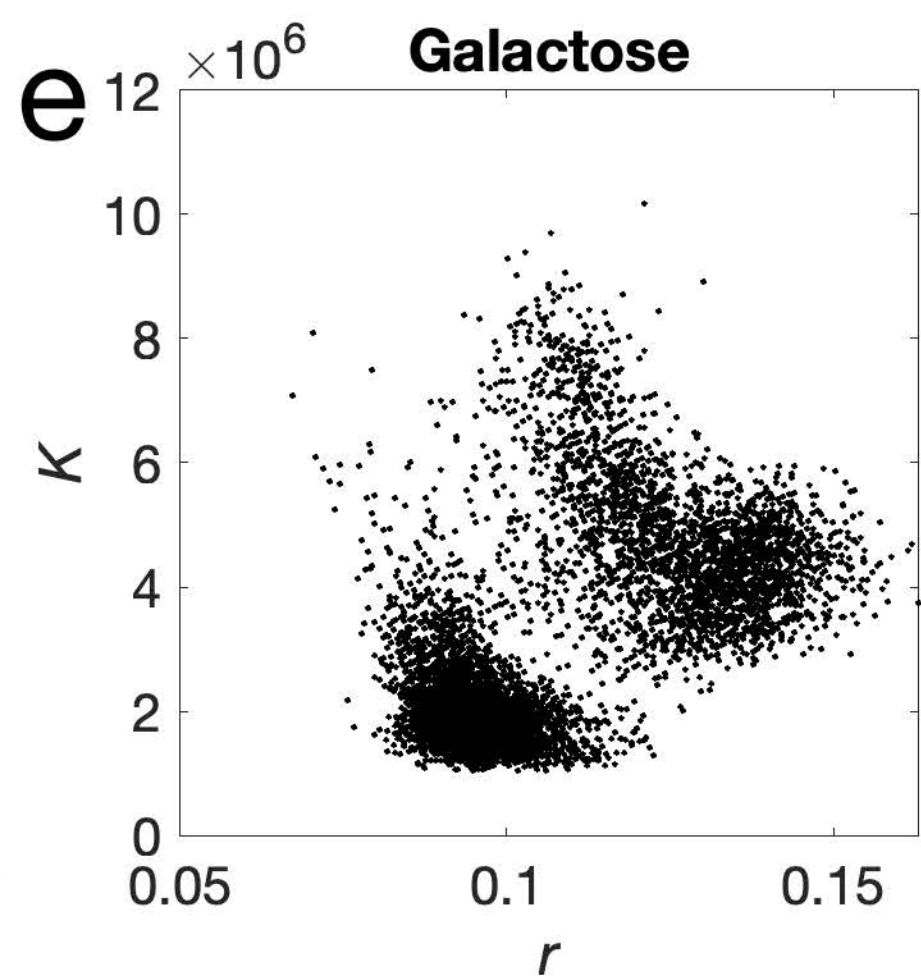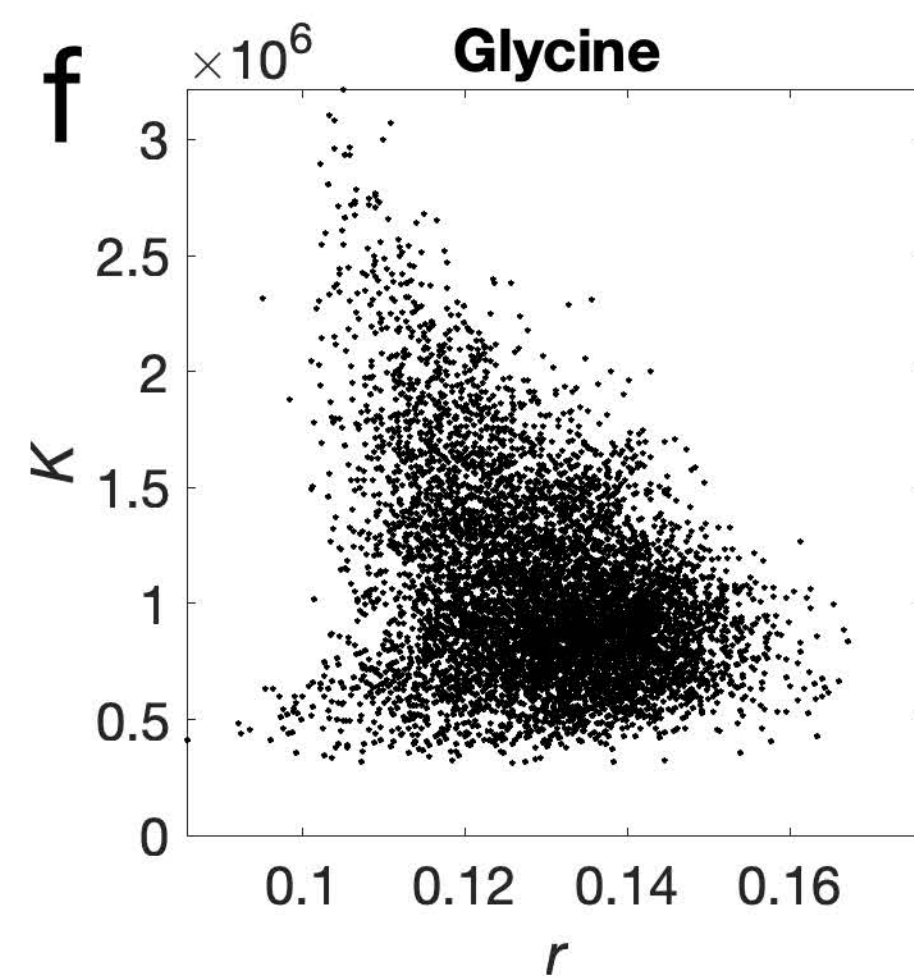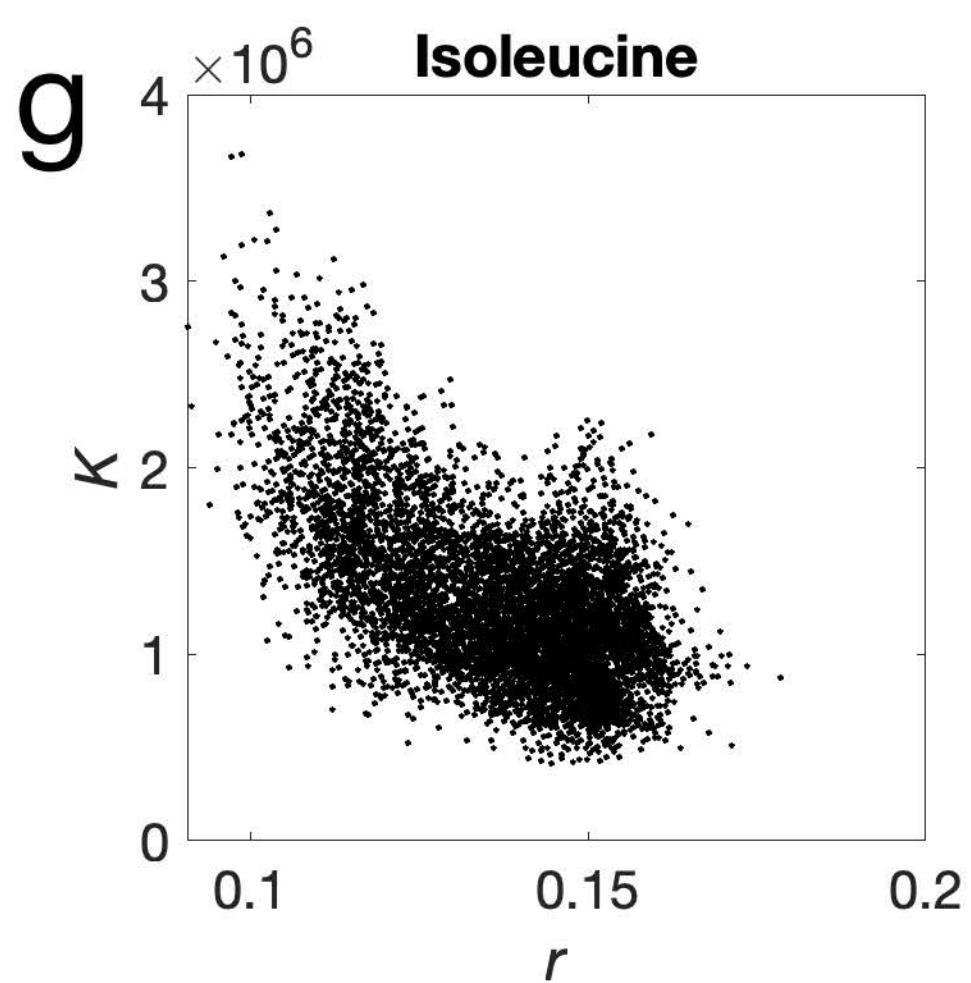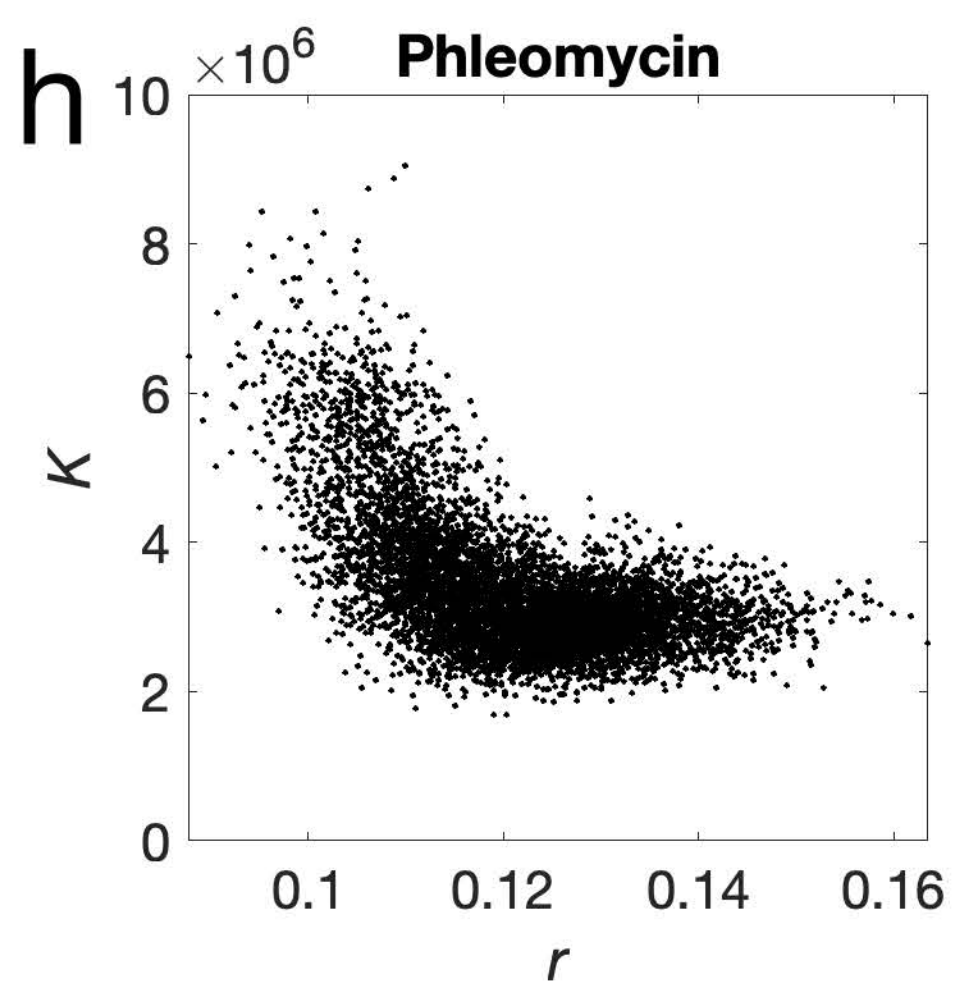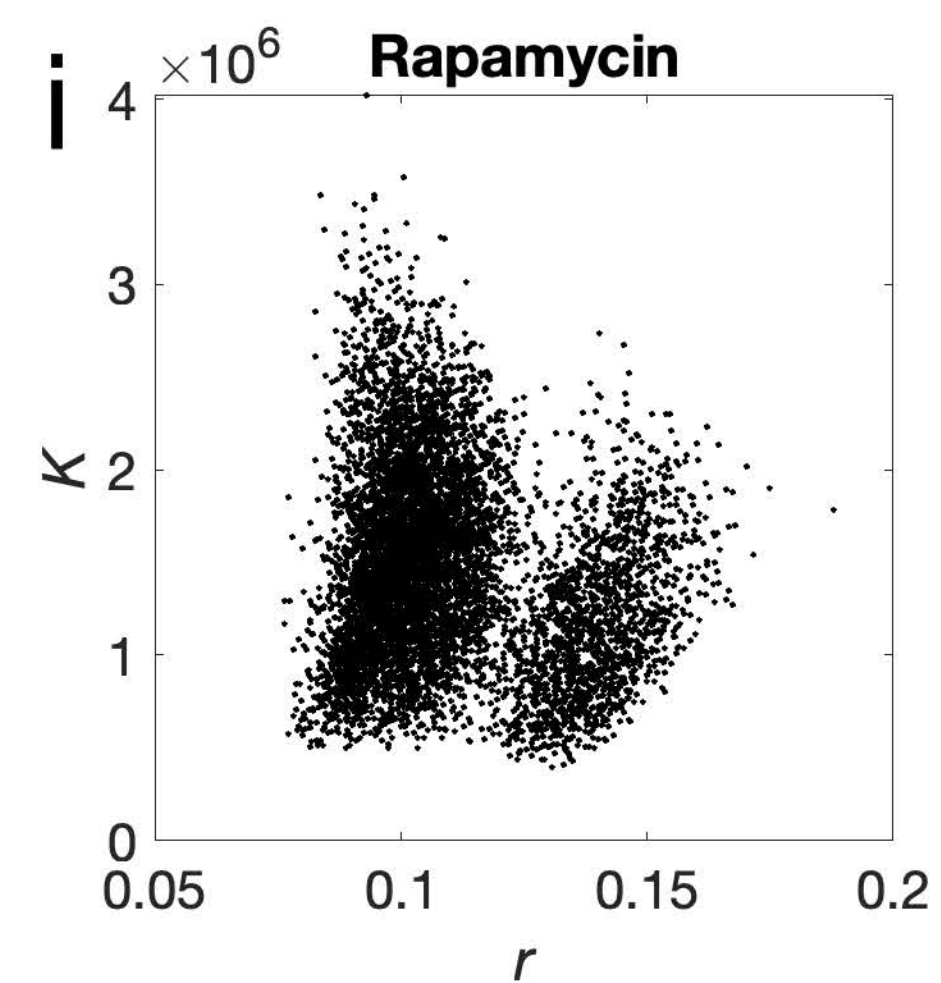

Supplement: pbio.3000121.s001.pdf [file pbio.3000121.s001.pdf]
