# Supplementary material for: Environment-dependent pleiotropic effects of mutations on the maximum growth rate r and carrying capacity K of population growth
Source: PubMed Central journal article supplement (PMC6364931; doi:10.1371/journal.pbio.3000121), 2019-01-25
Supplement: pbio.3000121.s004.pdf [file pbio.3000121.s004.pdf]

**S1 Table. Variables and stresses among the nine growth media**

| Environment | Concentration    | Type                                |
|-------------|------------------|-------------------------------------|
| Hydroxyurea | 2.5mg/ml         | Toxin                               |
| NaCl        | 1.4M             | Cation stress                       |
| Allantoin   | 30mg N/L         | Nitrogen source (replaces ammonium) |
| Caffeine    | 2.25mg/mL        | Toxin                               |
| Galactose   | 2%               | Carbon source (replaces glucose)    |
| Glycine     | 30mg N/L         | Nitrogen source (replaces ammonium) |
| Isoleucine  | 30mg N/L         | Nitrogen source (replaces ammonium) |
| Phleomycin  | 2 $\mu$ g/ml     | Toxin                               |
| Rapamycin   | 0.024 $\mu$ g/ml | Toxin                               |
