# Supplementary material for: Environment-dependent pleiotropic effects of mutations on the maximum growth rate r and carrying capacity K of population growth
Source: PLoS Biol. 2019 Jan 25;17(1):e3000121. doi: 10.1371/journal.pbio.3000121 (PMC6364931; doi:10.1371/journal.pbio.3000121)
Supplement: S1 Data — (XLSX) [file pbio.3000121.s005.xlsx]

## Sheet: Data S1
S1 Data. Estimated r and K for each genotype in each of the nine environments
Strain	hydroxyurea_r	hydroxyurea_k	NaCl_r	NaCl_k	allantoin_r	allantoin_k	caffeine_r	caffeine_k	galactose_r	galactose_k	glycine_r	glycine_k	isoleucine_r	isoleucine_k	phleomycin_r	phleomycin_k	rapamycin_r	rapamycin_k
201-1	0.0864582	4.97293e+06	0.0679633	2.70721e+06	0.106629	3.68524e+06	0.0773488	2.85524e+06	0.081173	5.16758e+06	0.0942563	2.71603e+06	0.081053	2.49427e+06	0.0882806	8.54849e+06	0.0801409	3.36817e+06
201-10	0.0979258	3.45345e+06	0.064179	2.63621e+06	0.118401	2.3563e+06	0.0725563	2.16896e+06	0.078069	4.06674e+06	0.10084	2.56296e+06	0.090339	2.3747e+06	0.0789963	5.4478e+06	0.0822291	2.69605e+06
201-11	0.0850015	4.77475e+06	0.0656029	3.13952e+06	0.111672	3.06789e+06	0.080247	3.04333e+06	0.0788101	4.07744e+06	0.0969832	2.92707e+06	0.0835014	2.35754e+06	0.0809907	6.29822e+06	0.0827561	3.51545e+06
201-120	0.101311	2.13743e+06	0.0693258	1.44765e+06	0.112661	1.41454e+06	0.0810851	1.55793e+06	0.10102	5.11373e+06	0.133511	1.33181e+06	0.104954	1.25994e+06	0.0905628	4.5104e+06	0.0846147	1.71396e+06
201-121	0.093188	5.98413e+06	0.0678242	3.29939e+06	0.0907348	3.95839e+06	0.073456	1.86227e+06	0.0868737	6.59621e+06	0.0972237	2.80822e+06	0.0878952	2.98715e+06	0.0891164	7.9765e+06	0.080589	3.26996e+06
201-122	0.0985689	4.14114e+06	0.0679242	3.18332e+06	0.0954185	3.30987e+06	0.0873296	2.50759e+06	0.0782185	4.2885e+06	0.101718	2.42192e+06	0.0892974	2.42194e+06	0.0853084	7.08453e+06	0.0819364	3.63572e+06
201-123	0.0884107	4.02682e+06	0.0638596	2.09468e+06	0.0938237	3.44073e+06	0.0639302	1.98235e+06	0.0901336	5.20917e+06	0.101312	2.85622e+06	0.0892588	2.52472e+06	0.0850978	6.86474e+06	0.0753736	2.68419e+06
201-124	0.0891725	3.63325e+06	0.076958	2.64741e+06	0.105812	2.04004e+06	0.0842551	2.20313e+06	0.098761	7.36545e+06	0.110854	1.88732e+06	0.10009	1.71399e+06	0.0870535	5.10657e+06	0.0907722	2.89439e+06
201-126	0.0902657	3.75898e+06	0.0711538	1.97475e+06	0.0983006	2.82456e+06	0.0852751	2.2049e+06	0.0917145	6.2808e+06	0.105177	2.49831e+06	0.0891238	1.8276e+06	0.0819442	7.81442e+06	0.0852491	2.29491e+06
201-127	0.0933252	4.33089e+06	0.062137	2.28842e+06	0.0961768	3.31043e+06	0.0604574	2.37753e+06	0.100166	8.84233e+06	0.100895	2.84496e+06	0.0889748	2.50957e+06	0.0813812	6.25362e+06	0.0769189	2.6419e+06
201-128	0.0994954	3.6714e+06	0.0687213	1.93537e+06	0.10072	2.47671e+06	0.0677075	1.61415e+06	0.0810476	3.06063e+06	0.10741	1.93914e+06	0.0947312	2.10064e+06	0.0856924	5.18323e+06	0.0854519	2.37126e+06
201-129	0.0994692	2.90982e+06	0.0813155	2.12684e+06	0.110709	1.60106e+06	0.0799535	2.05692e+06	0.0843781	2.69108e+06	0.115442	1.90008e+06	0.105773	1.31322e+06	0.0897902	4.47413e+06	0.0932675	2.5623e+06
201-13	0.0968392	2.91241e+06	0.0618815	2.31922e+06	0.12014	1.92814e+06	0.0769851	2.38924e+06	0.0806112	2.90513e+06	0.108244	2.14917e+06	0.0929334	1.81005e+06	0.0977426	4.88196e+06	0.0822602	2.68147e+06
201-130	0.0959127	5.09393e+06	0.0698663	2.72228e+06	0.0953125	3.32948e+06	0.0815488	2.42743e+06	0.0793262	4.45211e+06	0.100661	2.42868e+06	0.0918964	2.6143e+06	0.0822297	7.12399e+06	0.0841384	3.58472e+06
201-131	0.101805	4.07311e+06	0.0662867	2.33835e+06	0.0983342	2.81566e+06	0.0712935	2.19963e+06	0.0868631	3.24283e+06	0.107061	2.26545e+06	0.0942848	2.10145e+06	0.0869759	5.49046e+06	0.0819754	2.46471e+06
201-132	0.0917712	5.87825e+06	0.0646397	2.84122e+06	0.0948965	3.49908e+06	0.0745225	2.55562e+06	0.0799835	4.30031e+06	0.100445	2.84304e+06	0.0879762	2.72752e+06	0.0915597	7.33012e+06	0.0800475	3.47295e+06
201-133	0.0964754	3.15967e+06	0.0748088	2.57164e+06	0.112274	2.11478e+06	0.0867342	2.30631e+06	0.100094	6.19915e+06	0.115698	1.80138e+06	0.0956138	1.30956e+06	0.0915224	4.76373e+06	0.0854786	2.14818e+06
201-14	0.0911362	6.65513e+06	0.0685518	4.23565e+06	0.107362	3.64429e+06	0.074165	2.79536e+06	0.0817685	5.68764e+06	0.0950757	3.23847e+06	0.0875463	2.99837e+06	0.100341	9.47367e+06	0.0755856	3.52175e+06
201-15	0.0896578	4.22069e+06	0.0731513	2.12156e+06	0.111818	2.6758e+06	0.0729134	2.26425e+06	0.0771823	4.73551e+06	0.103699	2.39453e+06	0.0937944	1.90465e+06	0.0917545	7.18461e+06	0.0884209	2.93228e+06
201-16	0.0892562	4.69535e+06	0.0709165	2.19685e+06	0.11102	2.83475e+06	0.0741462	2.01218e+06	0.0752933	4.09079e+06	0.101123	2.39344e+06	0.0957294	2.68374e+06	0.0958766	7.35314e+06	0.0845451	3.03978e+06
201-17	0.0936144	3.41802e+06	0.0706484	2.14968e+06	0.121012	2.23894e+06	0.0768178	2.04846e+06	0.0819896	3.04632e+06	0.107231	2.00882e+06	0.0965923	2.26329e+06	0.0927436	4.58299e+06	0.0822083	2.75547e+06
201-18	0.0890804	5.01924e+06	0.0699275	2.53642e+06	0.105831	3.60021e+06	0.0757739	2.26089e+06	0.0795977	4.96748e+06	0.0980968	2.84177e+06	0.0883369	3.15156e+06	0.080843	6.84389e+06	0.0792535	3.33665e+06
201-19	0.0872481	4.14678e+06	0.0673336	1.35222e+06	0.111641	2.49952e+06	0.0758615	2.30418e+06	0.0785453	3.86038e+06	0.10505	2.13305e+06	0.0961381	1.93577e+06	0.0875981	6.58546e+06	0.0827904	2.66968e+06
201-21	0.0913043	3.90372e+06	0.0736904	1.16922e+06	0.116269	1.92007e+06	0.0678977	1.16706e+06	0.0902159	7.57798e+06	0.10994	1.57648e+06	0.0972512	1.14123e+06	0.0895795	5.09532e+06	0.0819802	1.64126e+06
201-22	0.0946831	3.45636e+06	0.0631998	1.89082e+06	0.123772	2.30201e+06	0.079061	2.48689e+06	0.105609	7.27643e+06	0.108251	2.46849e+06	0.0986813	2.4834e+06	0.0923945	4.4548e+06	0.0785862	2.86614e+06
201-24	0.0880883	4.08262e+06	0.0682696	1.18854e+06	0.10472	3.21364e+06	0.0757381	2.34786e+06	0.0831834	5.20576e+06	0.101046	2.52331e+06	0.0940527	2.36789e+06	0.0789657	6.42753e+06	0.0820565	2.86489e+06
201-25	0.0902857	3.11336e+06	0.0631684	1.69936e+06	0.114642	2.36927e+06	0.071999	1.78078e+06	0.0925023	8.62876e+06	0.106682	2.23337e+06	0.0889731	1.85825e+06	0.0862244	4.77346e+06	0.0772835	2.29494e+06
201-26	0.0842915	5.33749e+06	0.0731159	3.1713e+06	0.110781	2.8392e+06	0.0772569	2.0521e+06	0.0801883	4.50453e+06	0.102205	2.26096e+06	0.0939449	2.51582e+06	0.0924677	7.77097e+06	0.080774	2.88766e+06
201-27	0.0904955	3.59196e+06	0.0667025	2.16836e+06	0.123196	2.13842e+06	0.0783425	2.49575e+06	0.0947316	6.80404e+06	0.108461	2.17448e+06	0.097122	2.19045e+06	0.0951709	4.90092e+06	0.0835469	2.96497e+06
201-28	0.0950753	6.03881e+06	0.075922	3.82693e+06	0.111024	3.32032e+06	0.0791198	2.26049e+06	0.123824	9.16331e+06	0.0983533	2.84489e+06	0.0904565	2.79413e+06	0.0955972	7.98261e+06	0.133876	2.19674e+06
201-29	0.0898439	4.67777e+06	0.0773585	3.43787e+06	0.116193	2.59638e+06	0.06864	1.849e+06	0.0836995	3.80451e+06	0.104512	2.29829e+06	0.0947523	2.26541e+06	0.0861572	6.10322e+06	0.127561	2.01033e+06
201-3	0.0886289	5.08481e+06	0.0702491	2.50712e+06	0.114953	2.8877e+06	0.0821383	2.27288e+06	0.0842379	4.99834e+06	0.099669	2.5124e+06	0.0878851	2.6433e+06	0.0873273	6.32374e+06	0.0841239	3.41157e+06
201-30	0.09117	4.37781e+06	0.0760903	2.4812e+06	0.115532	2.55971e+06	0.069424	1.93503e+06	0.0806919	3.64466e+06	0.104244	2.269e+06	0.0902217	2.01309e+06	0.0972182	6.21912e+06	0.112448	1.72776e+06
201-32	0.094532	3.19427e+06	0.0751158	2.34352e+06	0.122755	2.02947e+06	0.0737123	1.67268e+06	0.102551	6.42873e+06	0.110299	1.96265e+06	0.0935404	1.65028e+06	0.0911462	4.58553e+06	0.13153	1.97614e+06
201-33	0.0890402	4.30066e+06	0.064971	2.85655e+06	0.108263	3.31084e+06	0.0656464	2.15441e+06	0.0667581	6.70556e+06	0.093785	3.25844e+06	0.0874361	2.72941e+06	0.0824772	6.95473e+06	0.115553	2.00972e+06
201-34	0.0900815	4.73296e+06	0.0681252	3.29565e+06	0.112367	3.0947e+06	0.0749339	2.33348e+06	0.0826807	4.1479e+06	0.0953889	3.1058e+06	0.0901631	2.7658e+06	0.0930296	6.37104e+06	0.123388	2.67321e+06
201-35	0.0915341	3.52389e+06	0.0784088	2.80785e+06	0.122109	2.18468e+06	0.0807613	2.02471e+06	0.0819261	3.10832e+06	0.107789	2.0518e+06	0.0937606	1.79844e+06	0.093806	4.7708e+06	0.12854	1.93799e+06
201-36	0.103223	2.86747e+06	0.0721382	2.28221e+06	0.126371	1.88595e+06	0.081082	1.95146e+06	0.080085	2.29355e+06	0.113087	1.87297e+06	0.102405	1.72476e+06	0.0956293	4.05525e+06	0.123027	1.78565e+06
201-37	0.0876407	5.21437e+06	0.0666007	3.16724e+06	0.107191	3.32265e+06	0.0708244	2.35556e+06	0.073324	8.40528e+06	0.0942104	3.12004e+06	0.0860504	2.77691e+06	0.0897936	6.73075e+06	0.124507	2.51095e+06
201-38	0.0869719	3.02232e+06	0.0726034	2.00853e+06	0.119352	2.0974e+06	0.0699112	1.69099e+06	0.0810669	2.9636e+06	0.109357	2.00607e+06	0.09884	1.75418e+06	0.0891787	4.65632e+06	0.129212	1.7882e+06
201-39	0.0885185	5.81842e+06	0.0762591	5.84848e+06	0.11552	2.84477e+06	0.0799783	2.57816e+06	0.0818533	4.0742e+06	0.0995183	2.83818e+06	0.0894395	2.31915e+06	0.0953302	7.92943e+06	0.126399	2.95508e+06
201-4	0.0858179	3.26821e+06	0.0693314	3.0932e+06	0.122007	1.83938e+06	0.072713	2.02026e+06	0.0999621	7.62954e+06	0.10772	1.87684e+06	0.0923361	1.75288e+06	0.0901344	5.42565e+06	0.0861456	2.90694e+06
201-40	0.0967117	2.23022e+06	0.0763184	1.67692e+06	0.131268	1.49363e+06	0.0743064	1.71496e+06	0.0826664	2.18517e+06	0.11254	1.88556e+06	0.105109	1.50387e+06	0.0888652	3.66997e+06	0.125287	1.25767e+06
201-41	0.09145	4.72025e+06	0.0761001	3.58543e+06	0.0963187	3.235e+06	0.0722409	1.73103e+06	0.083101	5.1158e+06	0.0971924	2.44463e+06	0.0968765	1.84031e+06	0.0964263	7.57889e+06	0.113028	1.41136e+06
201-42	0.0997506	4.46601e+06	0.0667737	2.60951e+06	0.109247	2.71813e+06	0.0797257	2.50349e+06	0.0860582	4.55894e+06	0.0985878	2.65033e+06	0.0936922	2.1883e+06	0.0871383	6.18376e+06	0.123643	2.36184e+06
201-43	0.0926886	4.83781e+06	0.0625761	3.21779e+06	0.108783	3.13967e+06	0.0768958	2.22006e+06	0.079044	3.87878e+06	0.0959183	3.07414e+06	0.0907016	2.6988e+06	0.0932402	7.26305e+06	0.113899	1.9984e+06
201-44	0.0922362	3.17633e+06	0.0576823	3.00478e+06	0.119316	2.4119e+06	0.0712524	2.28083e+06	0.0787631	3.27954e+06	0.102002	2.6844e+06	0.0964547	2.14712e+06	0.0894113	5.36221e+06	0.123446	2.29937e+06
201-46	0.0934225	3.91912e+06	0.0617736	2.2278e+06	0.106838	3.26295e+06	0.0732388	2.30526e+06	0.0816495	4.61563e+06	0.0948535	3.39162e+06	0.0885283	2.69269e+06	0.0877014	6.16393e+06	0.110077	1.81472e+06
201-5	0.0864111	4.17843e+06	0.0630127	2.35515e+06	0.112827	2.76621e+06	0.0849451	2.38974e+06	0.0828733	5.85444e+06	0.093974	2.95123e+06	0.084228	2.86216e+06	0.084736	6.57363e+06	0.079601	2.79976e+06
201-51	0.0965225	3.68155e+06	0.0707981	1.88548e+06	0.113312	2.56338e+06	0.0769863	1.67885e+06	0.0979268	8.52489e+06	0.104694	2.04099e+06	0.0951654	1.61728e+06	0.0894643	6.3064e+06	0.133525	1.93761e+06
201-52	0.0978593	3.45433e+06	0.0739205	2.80397e+06	0.122566	1.5929e+06	0.0877113	2.3344e+06	0.0760798	3.03552e+06	0.107306	1.75071e+06	0.105953	1.55329e+06	0.0919744	4.72124e+06	0.1249	1.51069e+06
201-53	0.0910211	4.82765e+06	0.079581	3.21805e+06	0.0926713	3.58989e+06	0.0871008	2.68985e+06	0.0934451	9.40354e+06	0.0969027	2.70904e+06	0.0888481	2.92939e+06	0.0915959	8.59489e+06	0.0952054	2.69686e+06
201-55	0.0891239	4.84029e+06	0.0672888	3.27335e+06	0.0951119	3.25619e+06	0.0721862	2.524e+06	0.0724237	5.45956e+06	0.0965224	3.11103e+06	0.0876377	2.85334e+06	0.0865759	6.71209e+06	0.0896522	2.86695e+06
201-56	0.0981717	2.57892e+06	0.0662054	2.5839e+06	0.102065	2.36307e+06	0.0778002	2.65602e+06	0.0807247	3.55499e+06	0.10277	2.28952e+06	0.0903205	2.02801e+06	0.0881567	4.49991e+06	0.0948196	2.87665e+06
201-57	0.0905501	4.57549e+06	0.0759165	2.36119e+06	0.0946754	3.33413e+06	0.0758002	2.54013e+06	0.0714587	4.78941e+06	0.099062	2.8424e+06	0.0839331	2.14839e+06	0.0847126	5.82683e+06	0.0938657	2.88714e+06
201-59	0.0933736	3.58547e+06	0.0821875	2.39047e+06	0.10474	2.02316e+06	0.0841867	2.20486e+06	0.0865251	2.99042e+06	0.111005	1.92814e+06	0.100033	1.73491e+06	0.0922401	4.82364e+06	0.101085	2.54717e+06
201-6	0.0895605	3.91217e+06	0.0642797	2.45597e+06	0.114575	2.51156e+06	0.0718531	2.17706e+06	0.0609821	8.12301e+06	0.100398	2.58389e+06	0.0891372	2.59733e+06	0.0768931	7.02532e+06	0.0812797	2.72367e+06
201-60	0.096608	2.85438e+06	0.0755677	2.34956e+06	0.113321	1.70451e+06	0.0906646	1.99753e+06	0.0823333	2.78708e+06	0.116488	1.57074e+06	0.106993	1.40249e+06	0.0927677	4.40975e+06	0.0993648	2.54486e+06
201-61	0.0941604	5.3699e+06	0.0766334	3.59202e+06	0.0951459	3.18998e+06	0.0795084	2.24597e+06	0.0916837	9.71988e+06	0.100426	2.50953e+06	0.0880014	2.13055e+06	0.0802512	7.5959e+06	0.098756	3.435e+06
201-62	0.0913814	2.94859e+06	0.0732321	2.86919e+06	0.10387	2.39429e+06	0.0758936	2.09245e+06	0.0802097	3.03266e+06	0.106662	2.13546e+06	0.095929	2.28019e+06	0.0878314	5.63293e+06	0.0948917	2.36509e+06
201-63	0.0903311	4.21099e+06	0.0744972	3.45321e+06	0.101968	2.49649e+06	0.0827792	2.40027e+06	0.0844992	4.31817e+06	0.103864	2.30845e+06	0.0971105	2.07901e+06	0.0890959	7.28326e+06	0.0883092	2.34336e+06
201-64	0.0950659	2.13207e+06	0.0709989	1.95456e+06	0.110165	1.51004e+06	0.0735941	1.89577e+06	0.0848305	2.58076e+06	0.113991	1.772e+06	0.106975	1.25444e+06	0.0895891	4.33499e+06	0.0925965	1.93913e+06
201-65	0.0868906	5.02324e+06	0.0642127	2.83629e+06	0.0918492	3.556e+06	0.0685674	2.55195e+06	0.0789156	6.3891e+06	0.0938656	3.02063e+06	0.0923036	2.85386e+06	0.0940819	8.38116e+06	0.0893495	3.16549e+06
201-66	0.092771	4.78141e+06	0.0660951	2.73279e+06	0.0965213	3.31956e+06	0.0818971	2.54518e+06	0.0855644	5.11665e+06	0.101585	2.65478e+06	0.096852	2.63609e+06	0.0884749	6.84158e+06	0.0923607	2.70103e+06
201-67	0.0981577	4.25903e+06	0.0729856	2.88031e+06	0.102565	2.44168e+06	0.0866432	2.72507e+06	0.0854004	3.26665e+06	0.099068	2.42797e+06	0.098693	2.04372e+06	0.084572	7.01304e+06	0.0917699	2.66372e+06
201-68	0.0921284	2.86076e+06	0.0690088	1.6399e+06	0.107588	1.60712e+06	0.078152	1.91783e+06	0.0842922	3.00626e+06	0.105092	1.85203e+06	0.108423	1.48788e+06	0.0867407	4.69773e+06	0.0925477	1.87229e+06
201-69	0.087641	5.07952e+06	0.068207	2.87279e+06	0.0947841	3.31982e+06	0.0855354	2.36244e+06	0.0855213	4.55288e+06	0.100319	2.37413e+06	0.0946943	2.20441e+06	0.0814538	6.5648e+06	0.0901643	2.74391e+06
201-7	0.0936156	3.60761e+06	0.0739684	3.49007e+06	0.116092	2.12089e+06	0.0758631	1.93511e+06	0.0811327	3.25016e+06	0.103051	1.95605e+06	0.0922983	2.0997e+06	0.0907323	5.71352e+06	0.0806123	2.206e+06
201-70	0.0935101	4.13294e+06	0.0827802	2.99898e+06	0.101488	2.44871e+06	0.0828645	1.81203e+06	0.0863981	3.61243e+06	0.106307	1.87424e+06	0.101547	1.7216e+06	0.0935018	6.83143e+06	0.105062	2.58951e+06
201-71	0.0939652	4.07218e+06	0.0693314	2.69159e+06	0.102503	2.48041e+06	0.0822634	2.0463e+06	0.0956537	7.84951e+06	0.10696	1.95355e+06	0.0990165	1.8984e+06	0.0937125	6.2626e+06	0.0967366	3.00083e+06
201-72	0.0951229	3.46185e+06	0.0672633	2.33589e+06	0.109737	2.04986e+06	0.0863901	2.59468e+06	0.08608	2.89016e+06	0.110303	2.17485e+06	0.105152	1.92457e+06	0.0957962	4.74283e+06	0.0888071	2.17862e+06
201-73	0.0920806	4.57927e+06	0.0636769	2.19271e+06	0.0966837	3.4151e+06	0.0815752	2.39763e+06	0.10229	9.2055e+06	0.100851	2.87524e+06	0.0903149	2.14129e+06	0.0866321	7.0035e+06	0.0875312	2.32826e+06
201-74	0.0902981	3.43718e+06	0.0637072	2.58552e+06	0.0994681	2.73365e+06	0.0755089	2.52408e+06	0.0972402	8.80156e+06	0.100927	2.78535e+06	0.0968279	2.33994e+06	0.0916566	5.99388e+06	0.0904725	2.82122e+06
201-75	0.0895078	5.60185e+06	0.0699758	2.31698e+06	0.0980998	2.67968e+06	0.0844159	2.35666e+06	0.0885188	3.98699e+06	0.103465	2.38572e+06	0.0983138	2.11441e+06	0.0891608	7.39122e+06	0.0982741	3.05927e+06
201-77	0.0979331	5.87208e+06	0.0665305	3.61271e+06	0.0931547	4.16468e+06	0.0742799	2.84964e+06	0.0982482	1.01324e+07	0.102716	3.20133e+06	0.0801639	2.96108e+06	0.0871387	7.96691e+06	0.0738908	3.74672e+06
201-78	0.0984949	3.80935e+06	0.0713447	2.62309e+06	0.0984965	2.86055e+06	0.0785954	2.31568e+06	0.0813745	3.97127e+06	0.116024	2.31991e+06	0.0894792	2.48458e+06	0.0898607	6.27016e+06	0.0831227	3.25259e+06
201-8	0.0923616	2.95986e+06	0.0698978	1.90605e+06	0.137795	1.58546e+06	0.0843534	1.63828e+06	0.0876909	2.28079e+06	0.114917	1.81779e+06	0.102958	1.29229e+06	0.0906258	4.94405e+06	0.0870326	1.81679e+06
201-80	0.0930291	3.24004e+06	0.0734336	2.93096e+06	0.105469	2.60002e+06	0.0789606	2.47883e+06	0.0827549	3.19534e+06	0.126804	2.13047e+06	0.0946259	2.248e+06	0.0904676	5.07318e+06	0.0849188	3.31219e+06
201-81	0.0938703	4.26842e+06	0.0780177	3.46646e+06	0.0994332	2.79941e+06	0.0825149	1.92047e+06	0.0709858	5.89667e+06	0.117532	2.17499e+06	0.0920306	1.88204e+06	0.0838058	7.37359e+06	0.08612	3.63779e+06
201-82	0.0907799	4.05452e+06	0.0727925	3.46784e+06	0.102068	2.78814e+06	0.0847898	2.3539e+06	0.0822472	3.8879e+06	0.114248	2.08605e+06	0.0931239	2.49488e+06	0.0935013	6.46949e+06	0.081389	2.82932e+06
201-83	0.100572	3.83608e+06	0.0760445	3.33663e+06	0.100721	2.90061e+06	0.0778033	2.52985e+06	0.0809194	7.48009e+06	0.112159	2.26651e+06	0.0896275	2.47718e+06	0.0771656	6.17392e+06	0.0809395	3.10115e+06
201-84	0.0972217	2.79746e+06	0.0755636	2.76605e+06	0.112947	2.17046e+06	0.0792792	1.79372e+06	0.0900906	3.08505e+06	0.131771	1.69506e+06	0.095393	1.4547e+06	0.0968411	4.405e+06	0.0834971	2.86016e+06
201-85	0.093329	4.66532e+06	0.0705835	2.22476e+06	0.0962722	2.98237e+06	0.0784892	2.17602e+06	0.0716023	4.67969e+06	0.110887	2.55163e+06	0.0905984	2.625e+06	0.0844145	6.67011e+06	0.082151	3.00344e+06
201-86	0.0953215	3.4785e+06	0.0771455	2.72132e+06	0.102503	2.27057e+06	0.0811964	2.28337e+06	0.0862619	3.16045e+06	0.119985	1.91772e+06	0.0946681	2.04837e+06	0.0934839	5.11479e+06	0.0839768	2.71579e+06
201-9	0.0858279	4.21302e+06	0.0594088	2.15751e+06	0.112244	2.80649e+06	0.071522	1.87413e+06	0.0826457	5.29535e+06	0.0982405	2.78467e+06	0.0882281	2.39443e+06	0.0883309	7.59757e+06	0.0792039	2.66444e+06
203-1	0.0994599	2.61479e+06	0.0766335	1.65219e+06	0.122525	1.95688e+06	0.0578068	1.93218e+06	0.0768566	3.04466e+06	0.103268	1.47428e+06	0.100444	1.69622e+06	0.0918922	4.80381e+06	0.0891376	2.23389e+06
203-10	0.115426	1.97307e+06	0.0767675	1.1288e+06	0.136056	1.11822e+06	0.0477537	646380	0.0818487	2.40329e+06	0.112756	1.10694e+06	0.115508	1.65306e+06	0.0913322	3.66285e+06	0.0887545	1.4614e+06
203-11	0.109038	1.60872e+06	0.0762154	1.17904e+06	0.142927	1.16328e+06	0.0643072	1.67219e+06	0.0770573	2.21358e+06	0.117505	1.11413e+06	0.120536	1.02054e+06	0.0942947	2.95957e+06	0.0911123	1.80792e+06
203-120	0.130554	1.28457e+06	0.0756909	939874	-1	-1	0.0610485	1.06145e+06	0.0987272	3.8856e+06	0.127364	774002	0.125153	1.39257e+06	0.0948071	3.43848e+06	0.0879819	1.25144e+06
203-121	0.104497	2.95973e+06	0.0855036	1.33031e+06	-1	-1	0.0460613	1.08972e+06	0.0780673	2.92552e+06	0.106422	1.65281e+06	0.108648	2.12932e+06	0.0897154	5.09757e+06	0.0925645	1.91194e+06
203-122	0.105048	2.67604e+06	0.0807315	1.66329e+06	0.11017	1.94986e+06	0.0764501	1.58979e+06	0.0767463	3.04447e+06	0.106596	1.6005e+06	0.108262	2.1277e+06	0.0885226	5.54106e+06	0.0919884	2.67524e+06
203-123	0.112632	1.26506e+06	0.0742531	869500	0.122779	1.11604e+06	0.039405	1.18164e+06	0.0849584	2.26284e+06	0.119007	1.17957e+06	0.122112	1.3568e+06	0.0938209	3.38575e+06	0.0866033	1.36378e+06
203-124	0.108884	2.15046e+06	0.0823166	1.66277e+06	0.119834	1.25609e+06	0.0657285	1.38184e+06	0.101956	5.85155e+06	0.114619	1.18259e+06	0.117101	1.6116e+06	0.0918569	3.81401e+06	0.0985554	2.29543e+06
203-126	0.100338	2.32653e+06	0.0760195	1.30006e+06	-1	-1	0.0649313	1.50736e+06	0.0855817	4.00827e+06	0.115272	1.93909e+06	0.105743	1.56974e+06	0.0867326	5.18308e+06	0.0923887	1.95774e+06
203-127	0.103203	2.81803e+06	0.0716107	1.21699e+06	0.111014	1.77394e+06	0.054089	1.27271e+06	0.101341	7.60319e+06	0.111336	1.88021e+06	0.110145	2.02845e+06	0.0872025	4.88376e+06	0.0844656	1.70378e+06
203-128	0.112645	1.99927e+06	0.0805676	1.0693e+06	0.122638	1.17706e+06	0.0403207	977879	0.0813322	2.02487e+06	0.114638	1.14587e+06	0.121427	1.49632e+06	0.0940888	3.64432e+06	0.093622	1.62374e+06
203-129	0.10249	2.10457e+06	0.0911076	1.66266e+06	-1	-1	0.0606896	1.33383e+06	0.0829929	2.29699e+06	0.122819	1.23181e+06	0.121401	1.44178e+06	0.0945778	3.70345e+06	0.0963478	2.02441e+06
203-13	0.119675	1.3602e+06	0.0668817	965814	0.143893	867802	0.0529387	1.35277e+06	0.0794427	1.85549e+06	0.121544	914505	0.123897	831506	0.100695	2.96777e+06	0.0868714	1.3681e+06
203-130	0.111234	2.31475e+06	0.0832779	1.6122e+06	0.116046	1.52474e+06	0.0655035	1.49019e+06	0.0783111	2.4041e+06	0.107555	1.04821e+06	0.115572	1.69948e+06	0.0931372	4.14189e+06	0.0969182	2.36388e+06
203-131	0.111431	1.89548e+06	0.0782065	985684	0.121399	1.00316e+06	0.052076	1.15216e+06	0.0862524	2.27891e+06	0.112101	938103	0.11864	1.45023e+06	0.0910116	4.0205e+06	0.0888117	1.41551e+06
203-132	0.114572	2.04283e+06	0.0762688	1.15554e+06	0.11995	1.03623e+06	0.0630291	1.29629e+06	0.0804973	2.28526e+06	0.116619	951908	0.124398	1.39289e+06	0.0980948	3.8528e+06	0.092585	1.90918e+06
203-133	0.107125	1.75466e+06	0.0844995	1.85713e+06	0.130151	1.37087e+06	0.0710338	1.50578e+06	0.10913	4.62993e+06	0.128725	1.20678e+06	0.120593	999941	0.0972798	3.47882e+06	0.086869	1.46288e+06
203-14	0.0961161	3.55939e+06	0.0796709	2.3586e+06	0.120584	2.33004e+06	0.0546981	1.68773e+06	0.0759873	3.96515e+06	0.110589	1.53527e+06	0.106901	1.89747e+06	0.0948704	6.26039e+06	0.0853137	2.07893e+06
203-15	0.100761	2.78132e+06	0.0778382	1.55554e+06	-1	-1	0.0493435	1.76434e+06	0.0790655	3.48809e+06	0.113573	1.43589e+06	0.109737	1.58934e+06	0.0941748	5.66678e+06	0.0950483	2.19135e+06
203-16	0.108299	2.09857e+06	0.0779405	1.32373e+06	0.129011	1.42439e+06	0.0476439	850939	0.0782859	2.40963e+06	0.113361	994277	0.119959	1.55675e+06	0.0990452	3.81289e+06	0.0924291	1.88995e+06
203-17	0.119382	1.78028e+06	0.0797799	1.16757e+06	0.131041	1.41505e+06	0.0547891	1.31565e+06	0.0800504	2.32342e+06	0.110814	1.01444e+06	0.121145	1.52171e+06	0.0953213	3.48713e+06	0.0882386	1.60612e+06
203-18	0.105103	2.55483e+06	0.078257	1.24718e+06	0.119668	2.10568e+06	0.0537444	1.495e+06	0.0847651	3.14654e+06	0.103171	1.24026e+06	0.110112	2.14586e+06	0.0924679	4.73607e+06	0.0873687	1.59338e+06
203-19	0.101637	3.01191e+06	0.0681633	1.12749e+06	-1	-1	0.0531516	1.52368e+06	0.0747083	3.2318e+06	0.111297	1.31722e+06	0.107603	1.822e+06	0.0900564	5.52053e+06	0.0863559	1.98645e+06
203-21	0.109426	2.26737e+06	0.0758979	735835	-1	-1	0.0437149	1.23827e+06	0.0919957	4.37303e+06	0.121289	1.13935e+06	0.116111	1.11235e+06	0.0906251	3.77109e+06	0.0870614	1.35941e+06
203-22	0.114418	1.88335e+06	0.0675238	821497	0.129819	1.34138e+06	0.0489724	1.21851e+06	0.101783	5.22076e+06	0.110397	904583	0.120759	1.56969e+06	0.0947201	3.14696e+06	0.0864778	1.7312e+06
203-24	0.104921	1.35059e+06	0.0673653	834618	0.123003	1.50761e+06	0.051102	1.29957e+06	0.079767	2.52448e+06	0.109134	1.12198e+06	0.11435	1.64363e+06	0.0900363	3.20557e+06	0.0916638	1.95275e+06
203-25	0.100253	1.71923e+06	0.0677895	873973	0.126795	1.68507e+06	0.0469001	1.1638e+06	0.0967764	6.05368e+06	0.11956	1.45412e+06	0.11078	1.11363e+06	0.0911412	3.41049e+06	0.0810701	1.29946e+06
203-26	0.107177	1.83438e+06	0.0798242	1.61386e+06	-1	-1	0.0546378	857881	0.0810102	2.28994e+06	0.116156	940160	0.126285	1.43629e+06	0.0996844	3.80989e+06	0.0868789	1.57525e+06
203-27	0.113152	1.85949e+06	0.0765324	1.25402e+06	-1	-1	0.0703242	1.28448e+06	0.108168	4.6941e+06	0.119732	1.07033e+06	0.125016	1.47809e+06	0.100539	3.4277e+06	0.096901	1.85892e+06
203-28	0.0963078	3.76558e+06	0.0845079	3.27398e+06	-1	-1	0.056495	1.56144e+06	0.0827005	7.25722e+06	0.112506	1.41789e+06	0.106667	2.29402e+06	0.0861116	5.92941e+06	0.130524	1.49243e+06
203-29	0.10192	3.16324e+06	0.0832442	2.05109e+06	-1	-1	0.0557131	1.32357e+06	0.0766785	2.87188e+06	0.109946	1.29301e+06	0.109063	2.36003e+06	0.0924121	4.87544e+06	0.125359	1.54052e+06
203-3	0.106469	1.98305e+06	0.0823095	1.15433e+06	0.139329	1.0386e+06	0.0669744	1.1399e+06	0.0764478	2.17414e+06	0.112708	966016	0.117911	1.51806e+06	0.0971414	3.22778e+06	0.0936721	1.87466e+06
203-30	0.106999	1.57083e+06	0.0809246	1.24644e+06	0.13676	1.29151e+06	0.0483971	788027	0.0822403	1.87272e+06	0.112862	846744	0.11918	1.11131e+06	0.099659	3.11166e+06	0.113311	884348
203-32	0.115512	1.54812e+06	0.0818991	1.30621e+06	0.133955	1.30452e+06	0.0485138	1.52875e+06	0.0960614	3.98523e+06	0.119473	1.12293e+06	0.120342	1.02408e+06	0.0933285	3.29011e+06	0.129255	1.14901e+06
203-33	0.104373	1.8279e+06	0.0815101	1.36183e+06	0.120516	1.98087e+06	0.0505983	1.74948e+06	0.0848525	2.68056e+06	0.109154	1.52911e+06	0.109475	2.10867e+06	0.0980252	3.99902e+06	0.12052	915541
203-34	0.0969155	3.08726e+06	0.0824268	1.75609e+06	-1	-1	0.0566581	1.3041e+06	0.0832797	2.93318e+06	0.102516	1.52032e+06	0.108953	2.23375e+06	0.0921161	4.93841e+06	0.13043	1.74971e+06
203-35	0.104041	1.69235e+06	0.0877556	1.59067e+06	0.139958	1.22741e+06	0.0727269	1.16239e+06	0.0797258	2.02493e+06	0.121431	962863	0.121663	1.18236e+06	0.0965236	3.2313e+06	0.127914	1.17751e+06
203-36	0.114782	1.63529e+06	0.0791216	1.28107e+06	0.130285	1.19323e+06	0.0696993	1.17811e+06	0.0803116	1.98957e+06	0.114146	1.02568e+06	0.121887	1.61423e+06	0.098163	3.24108e+06	0.121278	1.18258e+06
203-37	0.110401	1.82418e+06	0.0801094	1.41504e+06	0.124205	1.52895e+06	0.0530951	1.58723e+06	0.0828774	2.16519e+06	0.102978	1.03983e+06	0.115732	1.78554e+06	0.0978236	3.34217e+06	0.128086	1.56359e+06
203-38	0.0984827	1.85348e+06	0.0742812	1.28818e+06	-1	-1	0.0489052	1.66994e+06	0.0802206	2.20836e+06	0.112483	1.34485e+06	0.113453	1.97264e+06	0.091496	3.84524e+06	0.129715	1.47383e+06
203-39	0.108126	2.40304e+06	0.0921455	2.67939e+06	0.139013	1.26597e+06	0.0574769	1.24764e+06	0.0800736	2.06239e+06	0.114648	986023	0.124478	1.1546e+06	0.100968	3.67254e+06	0.13309	1.82874e+06
203-4	0.0989281	1.88059e+06	0.0752141	1.59759e+06	0.138141	1.23454e+06	0.0532084	1.28347e+06	0.102599	5.87702e+06	0.116738	1.11595e+06	0.116109	1.14814e+06	0.0985597	3.94466e+06	0.0915897	2.03424e+06
203-40	0.117356	1.18138e+06	0.0795248	1.19268e+06	-1	-1	0.0537146	1.4774e+06	0.0826932	1.75682e+06	0.124136	874247	0.127864	1.461e+06	0.0917167	2.83439e+06	0.127156	962776
203-41	0.104495	1.61295e+06	0.0789331	1.50937e+06	0.122075	1.82716e+06	0.0595792	671817	0.0787333	2.44603e+06	0.101106	874717	0.114235	1.79656e+06	0.098149	4.36366e+06	0.117275	1.08496e+06
203-42	0.107537	2.4238e+06	0.0783141	1.59402e+06	0.121593	1.48846e+06	0.0669352	1.42367e+06	0.0845849	2.95892e+06	0.111797	1.25862e+06	0.113631	1.72379e+06	0.0890781	4.82012e+06	0.126608	1.74033e+06
203-43	0.123464	1.43882e+06	0.0748947	1.17816e+06	0.131507	1.10753e+06	0.0576202	1.14806e+06	0.078471	1.80363e+06	0.110415	880981	0.125423	1.30314e+06	0.101306	3.25649e+06	0.113369	994237
203-44	0.104701	1.7987e+06	0.069899	1.6819e+06	-1	-1	0.0537411	1.36775e+06	0.0748984	2.48037e+06	0.10941	1.19927e+06	0.119485	1.72133e+06	0.0991026	3.68532e+06	0.127042	1.81113e+06
203-46	0.108405	2.22512e+06	0.0735131	1.20994e+06	0.123571	1.70188e+06	0.0536252	1.34511e+06	0.0867318	2.9102e+06	0.107608	1.43096e+06	0.113629	1.9806e+06	0.0973519	4.7149e+06	0.105457	1.06971e+06
203-5	0.100356	2.09369e+06	0.0701859	1.29924e+06	-1	-1	0.066508	1.46508e+06	0.0829298	2.76837e+06	0.105171	1.51529e+06	0.107897	2.0643e+06	0.0915522	4.63903e+06	0.0841358	1.47768e+06
203-51	0.119582	1.35636e+06	0.0704945	1.10015e+06	-1	-1	0.0658636	577559	0.0962691	3.90366e+06	0.124355	823955	0.124177	933322	0.0926159	3.34245e+06	0.128246	1.08329e+06
203-52	0.11832	2.17294e+06	0.0793363	1.78336e+06	-1	-1	0.0825229	1.48944e+06	0.0785713	2.17849e+06	0.118354	781695	0.130024	1.31294e+06	0.0987341	3.54766e+06	0.121648	1.23227e+06
203-53	0.101622	2.0261e+06	0.0805266	1.91359e+06	-1	-1	0.0831888	1.34404e+06	0.0832834	6.80638e+06	0.10524	1.44004e+06	0.107962	2.3429e+06	0.0814038	5.58749e+06	0.0984027	1.72702e+06
203-55	0.114558	1.78204e+06	0.0827599	1.23239e+06	0.118642	1.04412e+06	0.0451578	1.91978e+06	0.0780586	1.94623e+06	0.114749	982316	0.125571	1.36329e+06	0.0982239	3.32448e+06	0.094293	1.38068e+06
203-56	0.11405	1.22211e+06	0.0792072	801369	0.116838	1.17478e+06	0.063099	1.20237e+06	0.0883142	1.85366e+06	0.118994	987955	0.118824	845679	0.0974944	2.70567e+06	0.0986005	1.56712e+06
203-57	0.105164	2.31519e+06	0.083692	1.2568e+06	0.112173	2.04897e+06	0.057665	1.9377e+06	0.0850496	2.31262e+06	0.112991	1.81126e+06	0.108251	1.54545e+06	0.0896375	3.98366e+06	0.0975455	1.73333e+06
203-59	0.117635	2.05202e+06	0.0895207	1.32351e+06	-1	-1	0.0747288	1.40343e+06	0.0835084	2.01952e+06	0.121023	1.17712e+06	0.123447	1.59379e+06	0.0968127	3.49856e+06	0.102743	1.70472e+06
203-6	0.102277	2.73917e+06	0.070606	1.20261e+06	0.12569	1.61399e+06	0.0481753	1.89051e+06	0.0749747	2.63099e+06	0.106155	1.34558e+06	0.105119	2.12879e+06	0.0974323	4.52797e+06	0.0854798	1.75294e+06
203-60	0.108226	1.67159e+06	0.0862492	1.14614e+06	-1	-1	0.0832491	1.21545e+06	0.0819704	1.99347e+06	0.123374	969089	0.127303	1.43042e+06	0.0974075	3.34678e+06	0.106043	1.86988e+06
203-61	0.10967	2.15713e+06	0.0803686	1.4551e+06	-1	-1	0.0605549	1.34345e+06	0.0969174	4.46531e+06	0.117006	1.16926e+06	0.115584	1.23746e+06	0.0905562	3.65961e+06	0.102193	1.92649e+06
203-62	0.108911	1.66992e+06	0.0836997	1.37437e+06	0.116493	1.4443e+06	0.0502678	1.42378e+06	0.079113	2.3282e+06	0.112858	1.22445e+06	0.121054	1.69642e+06	0.0932344	4.29493e+06	0.0957254	1.58599e+06
203-63	0.112262	1.38655e+06	0.083407	1.29751e+06	-1	-1	0.0657673	1.18154e+06	0.0805471	2.12153e+06	0.123488	936481	0.129737	1.36821e+06	0.0995529	3.25623e+06	0.0936753	1.14784e+06
203-64	0.115558	950920	0.0760365	1.04947e+06	-1	-1	0.0554776	1.05842e+06	0.0824893	1.98779e+06	0.122924	873235	0.131495	1.20293e+06	0.0943537	3.22591e+06	0.0946473	1.34983e+06
203-65	0.10237	2.02102e+06	0.0738842	1.34858e+06	-1	-1	0.0458107	974642	0.0808961	2.99205e+06	0.107431	1.39838e+06	0.105278	2.32503e+06	0.0920395	5.15514e+06	0.0952026	1.97867e+06
203-66	0.102327	2.70232e+06	0.0731791	1.49604e+06	0.106968	2.1462e+06	0.0670811	1.60148e+06	0.0864374	3.07835e+06	0.106323	1.47078e+06	0.107615	2.65191e+06	0.0922981	5.0448e+06	0.0951327	2.06001e+06
203-67	0.115137	1.58431e+06	0.0870506	1.44165e+06	0.122994	1.10644e+06	0.0723015	1.20581e+06	0.0874209	2.02303e+06	0.110998	925960	0.123409	1.49063e+06	0.0963611	3.58035e+06	0.0949231	1.48796e+06
203-68	0.106074	1.9675e+06	0.0805904	972532	-1	-1	0.0574488	1.28346e+06	0.0829931	2.34164e+06	0.113185	980561	0.121772	1.52747e+06	0.0929667	3.34166e+06	0.0949361	1.23516e+06
203-69	0.10062	2.97927e+06	0.0777353	2.0384e+06	-1	-1	0.0666758	1.38879e+06	0.0853757	3.09805e+06	0.109648	1.37687e+06	0.105359	1.92784e+06	0.088784	5.00173e+06	0.0937702	1.94709e+06
203-7	0.120768	1.71195e+06	0.0820301	1.60623e+06	0.134523	1.10327e+06	0.0527178	1.09371e+06	0.0770704	2.09152e+06	0.106263	839829	0.123015	1.38362e+06	0.0995546	3.5168e+06	0.0805538	1.29568e+06
203-70	0.103796	3.53721e+06	0.0876781	2.3944e+06	-1	-1	0.0553597	1.83037e+06	0.0815036	3.32107e+06	0.107053	1.27256e+06	0.107396	1.90296e+06	0.0939461	6.18279e+06	0.104549	2.1845e+06
203-71	0.113803	2.29681e+06	0.0780779	1.66375e+06	0.120182	1.61267e+06	0.0630049	1.51972e+06	0.101804	5.71179e+06	0.116266	1.12343e+06	0.117046	1.34048e+06	0.102278	4.42336e+06	0.0998406	2.30151e+06
203-72	0.109782	2.55032e+06	0.0777978	1.18096e+06	0.120018	1.3664e+06	0.0757791	1.55926e+06	0.0849833	2.48045e+06	0.116283	1.40198e+06	0.121626	1.66773e+06	0.0991909	3.84038e+06	0.089673	1.56944e+06
203-73	0.104116	1.6706e+06	0.07363	937001	0.120568	1.3289e+06	0.0552401	1.1055e+06	0.0960614	5.1207e+06	0.120363	1.41832e+06	0.115531	1.19948e+06	0.0897865	3.62021e+06	0.0918378	1.07329e+06
203-74	0.10764	1.70717e+06	0.0811494	1.39222e+06	0.112639	1.4287e+06	0.0567444	1.49127e+06	0.0985193	6.51247e+06	0.112467	1.27835e+06	0.11426	1.7732e+06	0.0962648	4.15353e+06	0.095176	1.82393e+06
203-75	0.104747	2.39996e+06	0.0773221	1.31866e+06	-1	-1	0.0689795	1.19213e+06	0.0871344	2.07925e+06	0.122347	1.09814e+06	0.125784	1.54005e+06	0.0989645	3.75846e+06	0.106678	1.93522e+06
203-77	0.112366	2.77541e+06	0.0806425	1.67359e+06	0.112279	1.95515e+06	0.0626221	1.26136e+06	0.0898945	6.05723e+06	0.120918	1.36917e+06	0.107819	1.55298e+06	0.0872339	5.09343e+06	0.0886052	1.81828e+06
203-78	0.114953	2.47425e+06	0.0785414	1.25596e+06	-1	-1	0.0580008	966362	0.0844485	2.59915e+06	0.115977	1.52726e+06	0.109761	2.0721e+06	0.0908436	4.67201e+06	0.0869853	1.77103e+06
203-8	0.110176	1.81439e+06	0.075764	1.30765e+06	-1	-1	0.0635458	822441	0.0857987	1.73171e+06	0.124965	1.36463e+06	0.12114	1.18232e+06	0.0904174	4.02196e+06	0.0859877	1.42286e+06
203-80	0.107214	1.85415e+06	0.0830137	1.57835e+06	0.116482	1.57642e+06	0.0705026	1.44859e+06	0.0802301	2.27767e+06	0.123591	1.26654e+06	0.119371	1.63106e+06	0.0990773	3.58994e+06	0.0920151	2.38085e+06
203-81	0.105538	3.11012e+06	0.0844677	2.27222e+06	-1	-1	0.0634767	996684	0.0828536	3.20242e+06	0.125263	1.51545e+06	0.108783	1.61788e+06	0.0983412	4.97543e+06	0.0917404	2.57219e+06
203-82	0.110157	2.73739e+06	0.0781414	2.02117e+06	0.107082	1.92115e+06	0.0623219	1.49365e+06	0.0807604	2.64316e+06	0.104907	1.32396e+06	0.108869	2.06524e+06	0.0925544	5.27572e+06	0.087024	1.7597e+06
203-83	0.11326	2.2763e+06	0.0911137	1.67252e+06	-1	-1	0.0636164	1.46692e+06	0.100142	4.3991e+06	0.12237	1.10309e+06	0.119427	1.56789e+06	0.0986315	3.48301e+06	0.0876669	1.70844e+06
203-84	0.10127	1.80379e+06	0.0834637	1.94063e+06	0.122926	1.3781e+06	0.0579863	1.01389e+06	0.0867313	2.51739e+06	0.126297	1.20879e+06	0.116089	1.09381e+06	0.0976833	3.56295e+06	0.0899884	1.90746e+06
203-85	0.10742	2.14681e+06	0.078039	1.33963e+06	0.112941	1.41282e+06	0.0584554	1.45542e+06	0.0773491	2.06097e+06	0.128878	1.27875e+06	0.113806	1.74303e+06	0.0919526	3.75688e+06	0.0927581	1.70675e+06
203-86	0.107132	2.29122e+06	0.0882493	1.5044e+06	-1	-1	0.0630721	1.38695e+06	0.0835672	2.10483e+06	0.119151	1.14575e+06	0.1156	1.77809e+06	0.0968645	3.785e+06	0.0883758	1.39944e+06
203-9	0.102045	1.42741e+06	0.0625234	813383	0.135948	1.20326e+06	0.0419759	1.18781e+06	0.0793014	2.36648e+06	0.117873	1.15803e+06	0.114153	1.22356e+06	0.0927788	3.84631e+06	0.0826361	1.15764e+06
204-1	0.10161	2.99645e+06	0.0786139	3.13664e+06	0.122903	2.41424e+06	0.0649058	2.37139e+06	0.0768715	3.18086e+06	0.103634	1.8132e+06	0.0984423	2.08451e+06	0.101838	5.50813e+06	0.0862808	2.93522e+06
204-10	0.115439	2.49665e+06	0.071502	2.65758e+06	0.132279	1.87945e+06	0.0516945	2.33284e+06	0.0840481	2.97723e+06	0.107493	1.79551e+06	0.11015	2.51654e+06	0.0950572	4.956e+06	0.0882646	2.32939e+06
204-11	0.113752	2.4946e+06	0.0745707	2.49771e+06	0.144853	1.83492e+06	0.0804188	2.14515e+06	0.0788268	2.74865e+06	0.119863	1.69432e+06	0.11731	1.76304e+06	0.104356	4.21167e+06	0.0925434	2.50253e+06
204-120	0.135907	948486	0.0795276	1.20327e+06	0.136165	876560	0.0681757	894055	0.113957	3.68561e+06	0.122728	752388	0.131696	1.20827e+06	0.104733	2.89318e+06	0.0917168	1.39718e+06
204-121	0.104321	3.21659e+06	0.0822686	2.6678e+06	0.10888	2.34533e+06	0.0557592	1.6477e+06	0.0778903	2.7378e+06	0.105391	1.57869e+06	0.107143	2.55133e+06	0.097862	5.82828e+06	0.0914142	2.55624e+06
204-122	0.107783	2.56048e+06	0.0773551	2.97207e+06	0.11067	2.7981e+06	0.0764378	1.93019e+06	0.0726664	2.68594e+06	0.103964	1.57515e+06	0.105323	2.62102e+06	0.101701	5.6822e+06	0.0888029	3.28902e+06
204-123	0.113379	1.78871e+06	0.0731919	2.09516e+06	0.126329	2.06676e+06	0.0493295	1.4788e+06	0.0880563	2.33451e+06	0.117102	1.48185e+06	0.12025	1.8706e+06	0.111944	3.90547e+06	0.087419	1.76514e+06
204-124	0.111315	2.06771e+06	0.0887276	2.27869e+06	0.126588	1.37705e+06	0.075909	1.62886e+06	0.105867	5.55332e+06	0.114571	1.07237e+06	0.121389	1.55281e+06	0.0988172	4.12688e+06	0.0999804	2.41624e+06
204-126	0.101098	2.0962e+06	0.0816296	1.88874e+06	0.115614	1.74271e+06	0.0760032	1.70377e+06	0.0912232	4.24117e+06	0.118695	1.7911e+06	0.108844	1.43142e+06	0.0914542	6.14714e+06	0.0940074	1.85885e+06
204-127	0.0998809	3.17019e+06	0.0660195	2.34531e+06	0.110798	3.03378e+06	0.0589609	1.76553e+06	0.107247	8.23577e+06	0.107662	2.1211e+06	0.102113	2.96889e+06	0.0945831	5.84622e+06	0.0791003	2.36502e+06
204-128	0.118274	2.11156e+06	0.078811	1.76689e+06	0.126367	1.78224e+06	0.0486302	1.0193e+06	0.0818559	2.05341e+06	0.111501	1.07528e+06	0.119676	1.76463e+06	0.101978	3.86235e+06	0.0961526	1.94951e+06
204-129	0.106556	1.62944e+06	0.0943262	2.07982e+06	0.127751	1.04778e+06	0.0714005	1.5449e+06	0.0899989	2.08918e+06	0.125514	1.26764e+06	0.124698	1.39965e+06	0.0987043	3.89286e+06	0.0997446	2.24376e+06
204-13	0.130332	1.78377e+06	0.0695712	2.14683e+06	0.140609	1.46054e+06	0.065321	1.95524e+06	0.0766992	2.35438e+06	0.117702	1.46872e+06	0.116478	1.44485e+06	0.115648	3.88024e+06	0.0872867	2.13192e+06
204-130	0.113064	2.5922e+06	0.0842414	2.47873e+06	0.120555	2.08788e+06	0.0703891	1.73326e+06	0.0808158	2.08896e+06	0.102398	1.07371e+06	0.115071	2.01088e+06	0.102639	4.4386e+06	0.0961931	2.75855e+06
204-131	0.112197	2.59441e+06	0.0743987	2.20037e+06	0.121233	2.16368e+06	0.0604595	1.7492e+06	0.0852014	2.32604e+06	0.107165	1.32907e+06	0.113416	2.08997e+06	0.101712	4.28943e+06	0.0915651	1.99964e+06
204-132	0.120597	2.74619e+06	0.0774172	2.65488e+06	0.131618	1.99214e+06	0.0707954	1.7519e+06	0.0828499	2.30614e+06	0.11271	1.26977e+06	0.122275	2.18497e+06	0.106914	4.30303e+06	0.0933417	2.52681e+06
204-133	0.109664	1.96486e+06	0.0849835	2.52757e+06	0.13875	1.74341e+06	0.0798042	1.69408e+06	0.120479	5.08795e+06	0.125413	1.25212e+06	0.119802	1.19387e+06	0.115547	3.57444e+06	0.0937666	1.68638e+06
204-14	0.0951287	3.28885e+06	0.0782416	4.30084e+06	0.122487	2.9718e+06	0.0649727	2.11865e+06	0.0823682	4.39797e+06	0.104925	2.17311e+06	0.101321	2.42955e+06	0.105375	6.18615e+06	0.0834758	2.64367e+06
204-15	0.101975	2.46232e+06	0.0811843	2.73258e+06	0.12442	2.16096e+06	0.0625148	1.96168e+06	0.0753148	3.61002e+06	0.110704	1.68957e+06	0.109408	1.6264e+06	0.0965921	5.93909e+06	0.0984149	2.35932e+06
204-16	0.117155	1.90124e+06	0.0855804	2.12682e+06	0.136682	1.43299e+06	0.0645407	971992	0.0769736	2.00719e+06	0.11591	887369	0.125581	1.48184e+06	0.105955	3.80055e+06	0.0995683	1.90255e+06
204-17	0.118709	2.08846e+06	0.0801619	2.09898e+06	0.139074	1.62035e+06	0.0659072	1.57891e+06	0.0841346	2.28788e+06	0.108658	1.06486e+06	0.118172	1.92286e+06	0.107731	3.79772e+06	0.0893014	2.17503e+06
204-18	0.100457	3.09843e+06	0.0785491	2.46131e+06	0.122279	2.55596e+06	0.0623596	2.14599e+06	0.0853887	3.19226e+06	0.10188	1.63794e+06	0.104556	2.86786e+06	0.102045	5.32767e+06	0.0865812	2.59685e+06
204-19	0.0991538	2.75303e+06	0.070149	1.83561e+06	0.124297	2.1757e+06	0.070455	1.85371e+06	0.0724184	3.11485e+06	0.110898	1.46444e+06	0.106863	1.79016e+06	0.09442	5.62318e+06	0.0887461	2.19152e+06
204-21	0.107881	1.75888e+06	0.0816455	1.23693e+06	0.136627	1.28791e+06	0.0604658	688898	0.0967279	4.15906e+06	0.121487	992609	0.117649	1.03005e+06	0.0941173	3.88983e+06	0.0891417	1.24926e+06
204-22	0.115271	2.71149e+06	0.0685071	2.08617e+06	0.13534	1.88066e+06	0.0598983	1.83781e+06	0.112008	5.83101e+06	0.109379	1.56928e+06	0.116001	2.54613e+06	0.107717	3.91936e+06	0.0843507	2.49108e+06
204-24	0.111876	1.27748e+06	0.0687377	1.05528e+06	0.127162	1.72143e+06	0.0681459	1.33311e+06	0.0835069	2.14965e+06	0.107104	1.1077e+06	0.118501	1.6023e+06	0.0980724	3.42703e+06	0.0966657	1.76402e+06
204-25	0.102761	1.92159e+06	0.0685913	1.91169e+06	0.129561	1.89831e+06	0.0527078	1.40371e+06	0.103791	7.10427e+06	0.116161	1.58837e+06	0.105148	1.64136e+06	0.0979835	4.1852e+06	0.0849949	1.84509e+06
204-26	0.110995	1.98025e+06	0.0876933	2.54709e+06	0.135494	1.28787e+06	0.0673569	1.08753e+06	0.0850259	2.09239e+06	0.115362	843039	0.130038	1.46227e+06	0.106427	3.94888e+06	0.0921625	1.79206e+06
204-27	0.119778	2.14107e+06	0.0775639	2.2578e+06	0.142654	1.63537e+06	0.075333	1.69578e+06	0.114879	5.74726e+06	0.115749	1.30684e+06	0.123947	2.00204e+06	0.107753	4.20169e+06	0.0936386	2.53062e+06
204-28	0.10258	3.08175e+06	0.0861957	3.58229e+06	0.125045	2.27705e+06	0.0755042	1.53868e+06	0.105208	7.54436e+06	0.113317	1.73868e+06	0.10992	2.33543e+06	0.0956952	6.06627e+06	0.143763	1.69642e+06
204-29	0.102894	2.75478e+06	0.0907143	2.66165e+06	0.127436	1.74121e+06	0.0525326	1.43456e+06	0.0763155	2.69157e+06	0.111703	1.41568e+06	0.111908	2.27314e+06	0.0943861	5.05338e+06	0.135483	1.56395e+06
204-3	0.111741	2.22688e+06	0.0817729	2.15037e+06	0.140447	1.62509e+06	0.0761444	1.7118e+06	0.0749009	2.54155e+06	0.112492	1.13827e+06	0.118855	1.94805e+06	0.107964	3.84343e+06	0.0928978	2.40708e+06
204-30	0.108145	2.21194e+06	0.0869187	2.27962e+06	0.137868	1.58001e+06	0.0602183	1.31925e+06	0.0809368	1.79739e+06	0.113296	1.18577e+06	0.114996	1.33468e+06	0.11393	3.40742e+06	0.118318	1.43836e+06
204-32	0.117459	2.01064e+06	0.0852487	2.20921e+06	0.140224	1.51675e+06	0.0628439	1.29628e+06	0.111138	4.23736e+06	0.11747	1.40818e+06	0.114152	1.37286e+06	0.10678	3.68269e+06	0.136197	1.77245e+06
204-33	0.0973462	2.59683e+06	0.0746014	2.79797e+06	0.119144	2.66678e+06	0.0521256	1.88235e+06	0.0823413	3.04702e+06	0.100375	2.48698e+06	0.102224	2.74701e+06	0.107756	5.11148e+06	0.117941	1.84238e+06
204-34	0.0960535	3.75077e+06	0.0732485	3.14286e+06	0.119907	2.55955e+06	0.0619079	1.55386e+06	0.0828768	3.45412e+06	0.098921	2.52781e+06	0.101359	3.29923e+06	0.0989531	6.06546e+06	0.125657	2.59783e+06
204-35	0.108986	1.82691e+06	0.0877713	2.49338e+06	0.142596	1.54963e+06	0.0737645	1.59617e+06	0.0763604	1.96799e+06	0.116884	1.33145e+06	0.116269	1.32266e+06	0.107091	3.393e+06	0.134544	1.65049e+06
204-36	0.119579	1.80414e+06	0.0804825	2.13452e+06	0.137626	1.45033e+06	0.0694612	1.92525e+06	0.0776963	1.83118e+06	0.116609	1.42502e+06	0.120346	1.90349e+06	0.114737	3.18079e+06	0.126506	1.60288e+06
204-37	0.111555	2.59742e+06	0.0818592	2.69814e+06	0.128275	2.01767e+06	0.0558739	1.56442e+06	0.0830006	2.41026e+06	0.107073	1.93595e+06	0.112807	2.31174e+06	0.112559	3.8011e+06	0.130861	2.07861e+06
204-38	0.102588	1.87377e+06	0.0852989	1.65013e+06	0.130814	1.3589e+06	0.0572461	1.1548e+06	0.0884118	1.74237e+06	0.111907	1.108e+06	0.117307	1.8079e+06	0.101201	3.51705e+06	0.136197	1.34285e+06
204-39	0.116434	3.43869e+06	0.0920882	4.27108e+06	0.142599	1.74397e+06	0.0691498	1.65778e+06	0.0852031	2.46148e+06	0.119812	1.80104e+06	0.12159	1.63439e+06	0.106839	4.88297e+06	0.135991	2.317e+06
204-4	0.103409	2.14826e+06	0.0826978	2.74752e+06	0.141691	1.52127e+06	0.0624557	1.77751e+06	0.108053	6.84522e+06	0.117851	1.27813e+06	0.11487	1.47685e+06	0.102258	4.32718e+06	0.0906851	2.452e+06
204-40	0.119756	980470	0.0879571	1.48735e+06	0.146212	794645	0.0670039	840294	0.0887581	1.33768e+06	0.126695	747514	0.129469	1.41736e+06	0.100899	2.65599e+06	0.136664	927151
204-41	0.104261	1.52749e+06	0.0819724	1.84821e+06	0.128429	1.62831e+06	0.0603796	582683	0.0803815	2.12978e+06	0.102074	652885	0.116036	1.84026e+06	0.100329	4.52724e+06	0.125448	1.24096e+06
204-42	0.112229	3.51386e+06	0.0754269	3.0561e+06	0.121722	2.23084e+06	0.0769283	1.98438e+06	0.0834215	3.50028e+06	0.105466	1.92302e+06	0.106679	2.64325e+06	0.0991469	5.46505e+06	0.130571	2.25604e+06
204-43	0.122827	1.74943e+06	0.0759711	2.55518e+06	0.135257	1.76686e+06	0.0639163	1.55686e+06	0.0754178	2.05102e+06	0.110499	1.58266e+06	0.118429	1.85136e+06	0.109737	3.82133e+06	0.120316	1.54648e+06
204-44	0.106235	2.14421e+06	0.0712092	2.94302e+06	0.136946	1.80318e+06	0.0617322	1.71206e+06	0.0803081	2.84771e+06	0.111449	1.84784e+06	0.116586	2.21788e+06	0.103168	4.30405e+06	0.130235	2.05258e+06
204-46	0.0998242	2.59394e+06	0.06897	2.40563e+06	0.121629	2.53538e+06	0.0633508	1.80491e+06	0.0847619	3.74659e+06	0.101471	2.46304e+06	0.102653	2.94987e+06	0.103929	5.26723e+06	0.113698	1.62587e+06
204-5	0.101108	2.65558e+06	0.0733077	2.74989e+06	0.121665	1.9567e+06	0.0685852	2.30106e+06	0.0818213	3.10473e+06	0.103159	1.87142e+06	0.102571	2.88487e+06	0.102661	5.32989e+06	0.0854574	2.34745e+06
204-51	0.126474	967695	0.077828	1.45145e+06	0.154062	846754	0.0732887	651089	0.100866	3.39052e+06	0.123448	613885	0.128225	805996	0.10257	3.28099e+06	0.142519	1.07657e+06
204-52	0.11747	2.09085e+06	0.0859051	2.36877e+06	0.145802	925763	0.0903561	1.6712e+06	0.0786564	2.04176e+06	0.11262	798888	0.132905	1.20178e+06	0.10159	3.54774e+06	0.135116	1.27607e+06
204-53	0.100189	1.48898e+06	0.0828646	2.82265e+06	0.110599	1.94831e+06	0.0879405	1.46517e+06	0.100785	5.90498e+06	0.105129	1.29197e+06	0.114227	2.09072e+06	0.0966513	5.16858e+06	0.0996991	1.69187e+06
204-55	0.117592	1.88685e+06	0.078774	2.42049e+06	0.121865	1.80006e+06	0.063796	1.69939e+06	0.0727541	2.57169e+06	0.115054	1.72992e+06	0.121677	2.23471e+06	0.105507	3.88396e+06	0.0973502	1.99762e+06
204-56	0.122857	1.7398e+06	0.0818921	2.44557e+06	0.120168	1.95169e+06	0.0725452	2.13791e+06	0.0812012	2.85227e+06	0.109707	1.60147e+06	0.109982	1.862e+06	0.108871	3.79441e+06	0.102338	2.62073e+06
204-57	0.105226	2.72937e+06	0.0820647	2.37227e+06	0.113676	2.42113e+06	0.0721995	1.925e+06	0.0760762	2.58485e+06	0.111549	1.79569e+06	0.104608	1.92531e+06	0.0956181	5.33537e+06	0.099674	2.35433e+06
204-59	0.113784	1.5481e+06	0.0925986	1.94245e+06	0.124515	1.15562e+06	0.0859643	1.36238e+06	0.0961792	1.57728e+06	0.120241	1.03788e+06	0.128871	1.34278e+06	0.108014	3.39337e+06	0.107677	1.72885e+06
204-6	0.10064	3.03539e+06	0.0744937	2.73838e+06	0.124145	2.26756e+06	0.0595439	2.05409e+06	0.0714888	2.7297e+06	0.106671	1.98788e+06	0.101114	2.88508e+06	0.107823	5.37515e+06	0.0865432	2.3548e+06
204-60	0.112864	1.78214e+06	0.0892397	1.60608e+06	0.125788	1.09921e+06	0.092833	1.24687e+06	0.0872889	1.52672e+06	0.123784	788547	0.127019	1.27003e+06	0.103843	3.31447e+06	0.108275	1.70869e+06
204-61	0.113685	2.422e+06	0.0838559	2.48429e+06	0.115294	1.77507e+06	0.0666087	1.51213e+06	0.1028	4.90245e+06	0.113664	1.35581e+06	0.11261	1.64008e+06	0.099682	4.25797e+06	0.105097	2.40197e+06
204-62	0.107136	1.87125e+06	0.0786731	2.42458e+06	0.119901	1.77297e+06	0.0664027	1.58105e+06	0.0773412	2.26705e+06	0.111907	1.38192e+06	0.118345	2.15652e+06	0.103248	4.32479e+06	0.0987244	2.05433e+06
204-63	0.118006	1.28492e+06	0.0918237	2.29815e+06	0.131564	1.1005e+06	0.0811727	1.31271e+06	0.086237	2.03327e+06	0.121004	983612	0.136115	1.27743e+06	0.107296	3.47881e+06	0.103936	1.35205e+06
204-64	0.120916	1.08829e+06	0.0800417	1.37381e+06	0.130221	866850	0.0658463	1.23602e+06	0.0897929	1.78155e+06	0.119833	861594	0.135052	1.1831e+06	0.102477	3.14587e+06	0.098164	1.32853e+06
204-65	0.101098	2.25218e+06	0.0809761	2.77948e+06	0.106783	2.08218e+06	0.0500849	2.02078e+06	0.0849833	3.37164e+06	0.107141	1.70352e+06	0.106271	2.39532e+06	0.101897	5.69367e+06	0.0983656	2.39591e+06
204-66	0.102392	2.67577e+06	0.0759145	2.60321e+06	0.108958	2.58133e+06	0.0729088	1.92433e+06	0.0810597	3.24158e+06	0.105692	1.6968e+06	0.105005	3.09049e+06	0.10117	5.57407e+06	0.098222	2.36046e+06
204-67	0.119977	1.48484e+06	0.0883029	1.98857e+06	0.126921	1.25498e+06	0.0825076	1.50732e+06	0.0918237	1.83684e+06	0.113843	1.05889e+06	0.125208	1.47856e+06	0.101928	3.73047e+06	0.103462	1.83432e+06
204-68	0.106319	1.60184e+06	0.0823828	1.47307e+06	0.127404	878856	0.0700276	1.28631e+06	0.0849548	2.0714e+06	0.11661	1.00182e+06	0.126178	1.55469e+06	0.099074	3.68281e+06	0.100947	1.53353e+06
204-69	0.101785	2.82601e+06	0.0825049	2.73858e+06	0.113818	2.23482e+06	0.0784534	1.53339e+06	0.0837528	2.85617e+06	0.111977	1.54069e+06	0.106644	1.94131e+06	0.103433	5.13791e+06	0.100936	2.20141e+06
204-7	0.126834	2.04131e+06	0.0872626	2.74512e+06	0.139489	1.45553e+06	0.0618902	1.62786e+06	0.0811967	2.1618e+06	0.111675	1.09387e+06	0.121577	1.69391e+06	0.107458	3.97139e+06	0.0858575	1.64595e+06
204-70	0.102225	2.64967e+06	0.0936191	2.90512e+06	0.115053	1.75116e+06	0.0663869	1.07464e+06	0.0840146	2.95958e+06	0.109465	1.22063e+06	0.108399	1.74459e+06	0.0963917	5.86651e+06	0.111363	2.2199e+06
204-71	0.115258	2.23699e+06	0.0836659	2.3881e+06	0.125822	1.703e+06	0.0745129	1.58915e+06	0.11107	6.05302e+06	0.119149	1.24672e+06	0.117718	1.47089e+06	0.113368	4.27129e+06	0.104442	2.5011e+06
204-72	0.11352	2.72608e+06	0.0797591	2.14152e+06	0.127717	1.77002e+06	0.0843716	1.78955e+06	0.0872008	2.56732e+06	0.117473	1.45976e+06	0.119606	2.13593e+06	0.105646	4.17565e+06	0.094294	1.89191e+06
204-73	0.106703	2.00921e+06	0.0719902	2.08031e+06	0.118616	1.97951e+06	0.0688328	1.71197e+06	0.105866	6.57141e+06	0.117458	1.52147e+06	0.11097	1.47102e+06	0.105982	4.5604e+06	0.0956919	1.62551e+06
204-74	0.10099	2.51862e+06	0.0740384	2.80269e+06	0.114793	2.34216e+06	0.066133	1.83558e+06	0.105615	7.70498e+06	0.108913	1.97421e+06	0.108798	2.55751e+06	0.106087	4.9526e+06	0.0962926	2.53022e+06
204-75	0.105468	2.08988e+06	0.0829141	1.76278e+06	0.131605	914279	0.0827391	1.32467e+06	0.0962867	1.82401e+06	0.123153	935707	0.131745	1.44469e+06	0.115126	3.62596e+06	0.112533	2.03829e+06
204-77	0.110449	3.23846e+06	0.0766619	3.10563e+06	0.111021	3.1819e+06	0.0689291	2.02411e+06	0.0993526	7.99528e+06	0.104374	2.05403e+06	0.0966417	2.25396e+06	0.0944431	6.34095e+06	0.0781694	3.35678e+06
204-78	0.112738	2.75474e+06	0.0850572	2.65268e+06	0.110812	2.28294e+06	0.0597075	1.60226e+06	0.0745128	2.8892e+06	0.108221	1.67976e+06	0.105738	2.58961e+06	0.101913	5.32045e+06	0.0859225	2.95651e+06
204-8	0.111105	1.65628e+06	0.0799143	1.67298e+06	0.146434	1.19679e+06	0.0805973	1.10213e+06	0.0948435	1.48369e+06	0.125127	1.55314e+06	0.121494	1.10681e+06	0.101488	3.9043e+06	0.0864205	1.59907e+06
204-80	0.111884	2.26966e+06	0.0846065	2.52729e+06	0.125247	2.15498e+06	0.0786973	1.81278e+06	0.0780211	2.4527e+06	0.116266	1.88323e+06	0.116618	2.36151e+06	0.111957	4.03996e+06	0.0875887	2.98315e+06
204-81	0.112569	2.53974e+06	0.0923534	3.29572e+06	0.117369	2.00043e+06	0.0705713	1.31958e+06	0.0809079	3.04394e+06	0.115518	1.43296e+06	0.110445	1.57183e+06	0.107103	5.05622e+06	0.0918053	2.56658e+06
204-82	0.10618	2.99211e+06	0.0861614	3.45727e+06	0.112651	2.45941e+06	0.0710857	1.79145e+06	0.0777275	2.79089e+06	0.103198	1.5751e+06	0.105368	2.67297e+06	0.0957951	5.81512e+06	0.0848078	2.68099e+06
204-83	0.115844	2.69711e+06	0.0863492	2.87652e+06	0.126186	2.18517e+06	0.069056	1.70698e+06	0.107058	5.68454e+06	0.109008	1.57121e+06	0.115458	2.48493e+06	0.103441	4.53908e+06	0.0845542	2.59515e+06
204-84	0.106677	2.39796e+06	0.0869124	2.6727e+06	0.130299	1.92583e+06	0.0694541	1.31482e+06	0.0920682	2.585e+06	0.122009	1.41793e+06	0.112276	1.43063e+06	0.112366	3.82886e+06	0.0835792	2.61978e+06
204-85	0.109179	2.14194e+06	0.0845214	2.0637e+06	0.117197	1.62213e+06	0.0664892	1.49976e+06	0.0753645	1.91108e+06	0.113272	1.27333e+06	0.117976	1.73257e+06	0.105624	3.85015e+06	0.0896954	2.33439e+06
204-86	0.10937	2.48165e+06	0.0894328	2.62222e+06	0.119793	1.75969e+06	0.0739876	1.82125e+06	0.0797569	2.40314e+06	0.106782	1.20593e+06	0.114918	1.9487e+06	0.105248	4.2479e+06	0.0842185	2.5139e+06
204-9	0.106881	2.01481e+06	0.0661023	1.78851e+06	0.134281	1.74628e+06	0.0537886	2.23649e+06	0.0790813	2.17386e+06	0.114554	1.51122e+06	0.110555	1.6009e+06	0.101078	4.4087e+06	0.0881196	1.99471e+06
205-1	0.102058	3.03105e+06	0.0841767	3.61661e+06	0.122083	2.32644e+06	0.0523452	1.68412e+06	0.082706	3.33584e+06	0.108296	2.01371e+06	0.0995333	2.11326e+06	0.0989305	5.33074e+06	0.0884928	2.95241e+06
205-10	0.113765	2.60621e+06	0.0778135	2.46314e+06	0.134442	1.76139e+06	0.0540119	1.39349e+06	0.0893335	2.81844e+06	0.119378	1.65097e+06	0.107726	1.91757e+06	0.102468	4.80869e+06	0.0908809	2.14696e+06
205-11	0.107374	2.61499e+06	0.0826559	2.16224e+06	0.148288	1.53885e+06	0.0771477	1.70745e+06	0.0859126	2.56727e+06	0.128919	1.39118e+06	0.119737	1.38461e+06	0.108537	4.0904e+06	0.097799	2.25062e+06
205-120	0.126284	1.13603e+06	0.0839964	1.4513e+06	0.136693	1.10717e+06	0.0729624	750205	0.10869	3.95162e+06	0.132234	821906	0.128817	1.08663e+06	0.103993	3.3236e+06	0.0890439	1.08989e+06
205-121	0.103728	3.4879e+06	0.0825234	3.05812e+06	0.114509	2.62575e+06	0.050081	1.33659e+06	0.0876937	3.61356e+06	0.114979	2.0009e+06	0.10478	2.07669e+06	0.0968226	6.10223e+06	0.0934352	3.01767e+06
205-122	0.106653	3.0524e+06	0.0814232	3.84795e+06	0.115299	2.98272e+06	0.0766711	1.90861e+06	0.0828894	3.2014e+06	0.11502	2.11244e+06	0.104215	2.28301e+06	0.0994379	6.48022e+06	0.0919233	3.74284e+06
205-123	0.10867	1.88052e+06	0.0819632	1.92197e+06	0.128517	1.67159e+06	0.0444894	1.24176e+06	0.0878836	2.51982e+06	0.124468	1.14219e+06	0.118717	1.37297e+06	0.10999	4.03697e+06	0.0892643	1.6558e+06
205-124	0.106791	2.5727e+06	0.0931137	2.91325e+06	0.12932	1.62976e+06	0.0708071	1.49081e+06	0.108867	6.39142e+06	0.124797	1.34444e+06	0.11648	1.52014e+06	0.101138	4.5271e+06	0.102192	2.56351e+06
205-126	0.101339	2.71657e+06	0.0851699	2.61536e+06	0.118732	2.01919e+06	0.0643569	1.86478e+06	0.0907126	4.40714e+06	0.122502	1.99726e+06	0.106432	1.67704e+06	0.0939791	6.50479e+06	0.0943839	2.02443e+06
205-127	0.102282	3.76522e+06	0.0750289	2.72647e+06	0.115067	2.64829e+06	0.0465037	1.44971e+06	0.109648	8.3213e+06	0.116405	2.11118e+06	0.104696	2.29804e+06	0.0958159	6.51544e+06	0.087827	2.45633e+06
205-128	0.109834	2.70235e+06	0.0802868	2.03162e+06	0.130603	1.92729e+06	0.0478296	972391	0.0851127	2.38421e+06	0.123105	1.35239e+06	0.117773	1.68837e+06	0.10282	4.28067e+06	0.0966129	1.9909e+06
205-129	0.102445	2.01775e+06	0.101472	2.39079e+06	0.132185	1.11362e+06	0.0648556	1.34266e+06	0.0910603	2.39392e+06	0.134772	1.13194e+06	0.124998	1.13226e+06	0.101147	4.19668e+06	0.104683	2.20069e+06
205-13	0.12767	1.6252e+06	0.0835033	2.09609e+06	0.137355	1.2387e+06	0.0572713	1.1893e+06	0.0825809	2.11756e+06	0.124707	1.1082e+06	0.1171	1.17707e+06	0.113113	3.3872e+06	0.0907283	1.91293e+06
205-130	0.109533	2.83146e+06	0.0878924	2.78733e+06	0.123453	1.98096e+06	0.064931	1.65757e+06	0.0864972	2.71984e+06	0.114963	1.28444e+06	0.11213	1.72419e+06	0.102112	4.5179e+06	0.0999695	2.99273e+06
205-131	0.108606	2.63273e+06	0.0832523	2.36648e+06	0.124397	1.79321e+06	0.0527308	1.32478e+06	0.0858745	2.62924e+06	0.117834	1.10856e+06	0.112711	1.60477e+06	0.101171	4.62345e+06	0.0912282	1.8464e+06
205-132	0.114825	2.6573e+06	0.0849682	2.48256e+06	0.133172	1.66683e+06	0.0663453	1.26863e+06	0.0880479	2.4005e+06	0.12272	1.11759e+06	0.119773	1.41965e+06	0.105803	4.09767e+06	0.099131	2.28613e+06
205-133	0.107416	2.31018e+06	0.0882345	2.84194e+06	0.141012	1.75173e+06	0.0751478	1.69066e+06	0.120823	5.0326e+06	0.132341	1.4516e+06	0.117517	1.2211e+06	0.115962	3.80298e+06	0.0951591	1.83877e+06
205-14	0.101252	3.36444e+06	0.0836966	5.3947e+06	0.122581	2.68232e+06	0.0546142	1.61809e+06	0.0805129	4.3966e+06	0.106787	2.3574e+06	0.0983208	2.37478e+06	0.0977373	6.42231e+06	0.0871876	3.16442e+06
205-15	0.10793	2.27075e+06	0.0881764	3.09804e+06	0.124685	2.06383e+06	0.046568	963691	0.0776449	3.6496e+06	0.115973	1.32331e+06	0.103642	1.78657e+06	0.0965334	5.55324e+06	0.0993448	2.89488e+06
205-16	0.107581	2.12266e+06	0.0872768	2.80683e+06	0.137342	1.38028e+06	0.0534624	775445	0.0789339	2.48243e+06	0.121887	1.1727e+06	0.115751	1.32751e+06	0.100344	3.92252e+06	0.0994673	2.56808e+06
205-17	0.109494	2.42245e+06	0.0854303	2.64195e+06	0.142973	1.69146e+06	0.0582325	1.39343e+06	0.0849313	2.7187e+06	0.11964	1.2545e+06	0.11392	1.75188e+06	0.10382	4.56384e+06	0.0915812	2.42431e+06
205-18	0.100173	3.50126e+06	0.0775001	3.0061e+06	0.128351	2.59253e+06	0.056924	1.89051e+06	0.0845523	4.0537e+06	0.110564	2.05406e+06	0.102432	2.59172e+06	0.09988	6.28482e+06	0.089261	2.94851e+06
205-19	0.0981192	3.02167e+06	0.0764692	2.43287e+06	0.124187	2.16215e+06	0.0566011	1.01087e+06	0.0778929	3.23517e+06	0.113223	1.55573e+06	0.103702	1.99609e+06	0.0936352	5.47431e+06	0.0947416	2.67491e+06
205-21	0.105119	1.88221e+06	0.0811478	1.53763e+06	0.144942	1.21119e+06	0.0484002	945457	0.0965824	4.44622e+06	0.128749	1.03346e+06	0.11639	1.01837e+06	0.0936039	3.94767e+06	0.0879995	1.14599e+06
205-22	0.106425	2.735e+06	0.0747139	1.98386e+06	0.139149	1.70114e+06	0.0581665	1.48724e+06	0.114225	6.19389e+06	0.119992	1.27335e+06	0.115307	1.94474e+06	0.107281	4.31719e+06	0.0895486	2.40001e+06
205-24	0.111979	1.48325e+06	0.0716584	1.32907e+06	0.13439	1.6413e+06	0.0616719	1.07417e+06	0.0825995	2.87638e+06	0.119292	1.02906e+06	0.113023	1.52886e+06	0.0978447	4.09542e+06	0.0984964	1.91382e+06
205-25	0.0997645	2.22481e+06	0.0718034	2.07405e+06	0.132458	1.89513e+06	0.0489787	1.46901e+06	0.102283	7.40042e+06	0.122035	1.73374e+06	0.104957	1.72763e+06	0.0989785	4.71341e+06	0.0898831	1.99842e+06
205-26	0.102046	2.12502e+06	0.093566	3.17399e+06	0.138687	1.27035e+06	0.0554624	624100	0.0864933	2.35369e+06	0.124036	958864	0.121433	1.17898e+06	0.10219	3.99229e+06	0.0947171	1.87324e+06
205-27	0.112471	2.14498e+06	0.0797753	2.39967e+06	0.147679	1.63383e+06	0.0754384	1.536e+06	0.111142	5.47909e+06	0.126628	1.54479e+06	0.118861	1.633e+06	0.105073	4.44062e+06	0.0965808	2.68176e+06
205-28	0.103398	2.9387e+06	0.0913684	3.99666e+06	0.136645	1.92942e+06	0.0745646	1.31566e+06	0.0999606	7.25629e+06	0.122942	1.68209e+06	0.11004	1.93726e+06	0.099454	5.68526e+06	0.140519	1.65273e+06
205-29	0.102382	3.33099e+06	0.0905771	3.32666e+06	0.132765	2.08455e+06	0.0540032	1.12774e+06	0.0854934	3.3181e+06	0.116756	1.63767e+06	0.108828	2.1198e+06	0.0975548	6.00899e+06	0.133602	1.87027e+06
205-3	0.106916	2.6457e+06	0.0829951	2.23918e+06	0.142668	1.56408e+06	0.0705351	1.77733e+06	0.0862712	2.78403e+06	0.120833	1.38625e+06	0.114357	1.70903e+06	0.107945	4.37818e+06	0.096141	2.59059e+06
205-30	0.101801	2.21917e+06	0.0972389	2.65965e+06	0.140925	1.38871e+06	0.05119	551595	0.0851508	2.23143e+06	0.113507	1.05141e+06	0.113469	1.32368e+06	0.107851	3.32442e+06	0.116522	1.41563e+06
205-32	0.112265	2.00435e+06	0.0916411	2.34847e+06	0.1457	1.53234e+06	0.0508374	1.42039e+06	0.113781	4.61131e+06	0.121449	1.36404e+06	0.114271	1.44229e+06	0.107112	3.78964e+06	0.137265	1.8766e+06
205-33	0.101797	2.71921e+06	0.08084	2.86011e+06	0.126766	2.43476e+06	0.0523322	1.84855e+06	0.0871059	3.61958e+06	0.110939	2.26433e+06	0.103139	2.16845e+06	0.106516	5.52859e+06	0.124688	1.87396e+06
205-34	0.098998	4.13943e+06	0.0799533	3.3579e+06	0.128052	2.5907e+06	0.0517722	1.63454e+06	0.0848079	3.71882e+06	0.107597	2.46033e+06	0.102895	2.61252e+06	0.101373	6.4179e+06	0.132896	2.57323e+06
205-35	0.106008	1.88676e+06	0.0915914	2.96194e+06	0.149004	1.55075e+06	0.0774398	1.39023e+06	0.083052	2.49825e+06	0.126221	1.49537e+06	0.114619	1.41079e+06	0.105979	3.76141e+06	0.134087	1.76992e+06
205-36	0.111415	2.13527e+06	0.087315	2.52526e+06	0.143764	1.58254e+06	0.0719539	1.40192e+06	0.0840986	2.19936e+06	0.125264	1.59706e+06	0.115416	1.64465e+06	0.111393	3.95818e+06	0.126841	1.66311e+06
205-37	0.108797	2.22685e+06	0.0894935	2.66304e+06	0.135943	1.85092e+06	0.0570021	1.42898e+06	0.0918018	2.66741e+06	0.117453	1.40023e+06	0.111616	1.72205e+06	0.113302	3.73836e+06	0.137318	1.99134e+06
205-38	0.100709	2.33734e+06	0.0863358	2.2665e+06	0.138355	1.75517e+06	0.0543692	1.38689e+06	0.0850119	2.41366e+06	0.120127	1.50099e+06	0.112078	1.76535e+06	0.102996	4.19033e+06	0.13865	1.71272e+06
205-39	0.105876	2.57566e+06	0.100013	3.98667e+06	0.137134	1.22565e+06	0.0683567	988601	0.0865737	2.25919e+06	0.117293	922629	0.118331	1.16938e+06	0.103085	3.82159e+06	0.153673	2.31728e+06
205-4	0.101633	2.30293e+06	0.0903081	3.14321e+06	0.142367	1.3644e+06	0.0525159	1.36798e+06	0.106445	6.10106e+06	0.120235	1.20829e+06	0.113772	1.39482e+06	0.102327	4.10295e+06	0.0955867	2.75162e+06
205-40	0.115403	1.24404e+06	0.0910128	1.85422e+06	0.15152	1.15283e+06	0.057805	921619	0.085161	1.8149e+06	0.132485	769548	0.126161	1.21258e+06	0.101821	2.98315e+06	0.131357	943035
205-41	0.0994072	1.46987e+06	0.0879398	2.25824e+06	0.132623	1.62339e+06	0.065452	439652	0.0857907	2.92848e+06	0.115403	878583	0.114166	1.41558e+06	0.099068	5.06144e+06	0.126197	1.01877e+06
205-42	0.115729	3.45711e+06	0.0770825	3.39998e+06	0.127883	2.26452e+06	0.0703573	1.89717e+06	0.0870024	3.78914e+06	0.109857	2.17202e+06	0.104375	2.29209e+06	0.0995321	6.08743e+06	0.132206	2.39237e+06
205-43	0.125207	1.80487e+06	0.0889651	2.58466e+06	0.1336	1.32794e+06	0.0492887	734417	0.0817621	2.02101e+06	0.117601	1.03211e+06	0.11489	1.25441e+06	0.107554	3.46332e+06	0.120802	1.39038e+06
205-44	0.105033	1.90284e+06	0.0791905	2.47536e+06	0.143016	1.49886e+06	0.052768	1.11891e+06	0.0825833	2.51173e+06	0.121768	1.29363e+06	0.117269	1.58913e+06	0.102562	4.15971e+06	0.142905	1.98098e+06
205-46	0.103482	3.04361e+06	0.0721658	2.3788e+06	0.128368	2.38651e+06	0.0546791	1.39731e+06	0.0868012	3.699e+06	0.112548	2.03592e+06	0.105459	2.33782e+06	0.103524	6.04723e+06	0.117376	1.51369e+06
205-5	0.102123	2.92622e+06	0.0785744	3.078e+06	0.127989	2.30055e+06	0.0639207	2.99628e+06	0.0827163	3.3351e+06	0.111534	2.30657e+06	0.101233	2.45001e+06	0.101597	6.14012e+06	0.0878794	2.60516e+06
205-51	0.118919	1.5847e+06	0.080873	1.769e+06	0.154184	1.04766e+06	0.0661559	572129	0.105265	4.94496e+06	0.129555	784429	0.124127	887723	0.10011	3.67172e+06	0.145813	1.2828e+06
205-52	0.109926	2.20192e+06	0.090046	3.08534e+06	0.145996	1.02044e+06	0.0767585	1.29641e+06	0.0824939	2.18092e+06	0.121107	890529	0.125501	1.08051e+06	0.0994455	3.42638e+06	0.132762	1.53559e+06
205-53	0.100294	1.97627e+06	0.0931097	2.52648e+06	0.11561	2.21349e+06	0.0846107	1.14909e+06	0.0958373	7.17815e+06	0.117297	1.82903e+06	0.115081	1.75826e+06	0.0955043	5.51294e+06	0.101491	1.33542e+06
205-55	0.109569	2.03549e+06	0.0866253	2.36048e+06	0.126169	1.52481e+06	0.0564121	1.25479e+06	0.0820758	2.55341e+06	0.125193	1.41122e+06	0.121347	1.61636e+06	0.104908	3.70764e+06	0.0995689	1.80191e+06
205-56	0.120792	1.7305e+06	0.0860939	2.037e+06	0.125886	1.59089e+06	0.0700846	1.54699e+06	0.0834645	2.65429e+06	0.121707	1.39392e+06	0.114123	1.50768e+06	0.107392	3.67295e+06	0.105886	2.2195e+06
205-57	0.105363	2.99067e+06	0.0838913	2.81211e+06	0.118233	2.27825e+06	0.068663	1.82857e+06	0.084315	3.05478e+06	0.11495	2.19142e+06	0.104	2.07581e+06	0.0975677	5.82512e+06	0.101937	2.56545e+06
205-59	0.110955	1.96758e+06	0.0980752	2.19878e+06	0.129688	1.45212e+06	0.0890691	1.37512e+06	0.0976963	2.08161e+06	0.128177	1.20203e+06	0.122598	1.39721e+06	0.108364	3.85185e+06	0.109444	1.73144e+06
205-6	0.104316	3.27015e+06	0.0838897	3.26974e+06	0.124289	2.2666e+06	0.0534004	1.70235e+06	0.0758456	3.46646e+06	0.11173	2.19979e+06	0.101824	2.51092e+06	0.0950704	5.8096e+06	0.0889006	2.75496e+06
205-60	0.111345	2.17998e+06	0.0936539	2.10221e+06	0.13033	1.4929e+06	0.0858244	1.26665e+06	0.0873228	2.23025e+06	0.129406	1.00573e+06	0.121727	1.37528e+06	0.105148	3.9244e+06	0.108137	1.91686e+06
205-61	0.108199	2.6997e+06	0.0879706	2.69672e+06	0.12038	1.84788e+06	0.0623982	1.37296e+06	0.10766	6.61097e+06	0.121368	1.58066e+06	0.112409	1.63816e+06	0.0985255	4.69354e+06	0.108755	2.61025e+06
205-62	0.105513	2.186e+06	0.0857397	2.53793e+06	0.122091	1.80668e+06	0.0583	1.54715e+06	0.0858882	2.72188e+06	0.120059	1.58316e+06	0.115781	2.04054e+06	0.102722	4.55697e+06	0.101511	2.10639e+06
205-63	0.121925	1.38414e+06	0.101007	2.40292e+06	0.131566	1.10567e+06	0.0670092	896248	0.0857793	2.06168e+06	0.125936	850106	0.125309	1.03079e+06	0.107247	3.28902e+06	0.10216	1.23883e+06
205-64	0.111715	1.19667e+06	0.0866374	1.60195e+06	0.135733	1.07941e+06	0.0531168	769455	0.088709	1.99576e+06	0.132913	889710	0.13177	1.04165e+06	0.103207	3.42925e+06	0.0985307	1.16001e+06
205-65	0.105545	2.58498e+06	0.0883154	3.07816e+06	0.109802	2.07459e+06	0.0498439	877987	0.086137	3.45006e+06	0.111452	1.65213e+06	0.103447	1.98225e+06	0.0983157	5.51151e+06	0.102071	2.38927e+06
205-66	0.101325	2.999e+06	0.0793102	3.12332e+06	0.114325	2.72106e+06	0.0691762	1.77306e+06	0.0890683	3.92823e+06	0.114002	2.33523e+06	0.103554	2.66525e+06	0.102822	6.58065e+06	0.0990782	2.56348e+06
205-67	0.113465	1.63179e+06	0.0960778	2.08053e+06	0.130887	1.0327e+06	0.0719434	1.0532e+06	0.089137	2.2498e+06	0.120855	847806	0.12282	1.19065e+06	0.101706	3.87151e+06	0.108613	1.65685e+06
205-68	0.10022	1.83878e+06	0.0840403	1.62669e+06	0.128105	1.14549e+06	0.0664382	1.11584e+06	0.084482	2.45833e+06	0.127759	1.12561e+06	0.122237	1.38724e+06	0.100027	4.0087e+06	0.101143	1.50667e+06
205-69	0.100761	3.57762e+06	0.0828128	3.14819e+06	0.113847	2.53296e+06	0.0686089	1.49327e+06	0.0896457	3.59323e+06	0.115114	1.93763e+06	0.104836	2.10599e+06	0.106314	5.66201e+06	0.0994592	2.36713e+06
205-7	0.116822	2.07662e+06	0.0947483	3.11743e+06	0.137159	1.40154e+06	0.0491319	1.03854e+06	0.0850704	2.32341e+06	0.115392	1.16009e+06	0.115244	1.46709e+06	0.106917	3.77539e+06	0.0882746	1.6965e+06
205-70	0.103259	2.90188e+06	0.0953338	3.55576e+06	0.117343	2.11467e+06	0.0626815	1.17795e+06	0.0851175	3.32503e+06	0.114353	1.26692e+06	0.109556	1.9023e+06	0.0963039	6.28381e+06	0.111117	2.57132e+06
205-71	0.104213	2.59972e+06	0.0872828	2.46096e+06	0.129651	1.74382e+06	0.0712195	1.44426e+06	0.113227	6.20835e+06	0.123255	1.26651e+06	0.116856	1.51413e+06	0.111916	4.31118e+06	0.108959	2.53887e+06
205-72	0.10472	2.67266e+06	0.0881729	2.34274e+06	0.127722	1.62203e+06	0.0691786	1.3689e+06	0.089394	2.53177e+06	0.122088	1.48885e+06	0.115362	1.69486e+06	0.105274	3.95307e+06	0.0947291	1.84731e+06
205-73	0.105429	2.36328e+06	0.0758848	2.28407e+06	0.122297	1.90174e+06	0.0577143	1.90753e+06	0.10645	6.82729e+06	0.118206	1.97646e+06	0.108179	1.65326e+06	0.103333	4.85745e+06	0.0963188	1.94728e+06
205-74	0.103439	2.42389e+06	0.08192	2.73946e+06	0.118507	1.99615e+06	0.0620945	1.52281e+06	0.107586	7.32919e+06	0.117003	1.58501e+06	0.107991	1.8831e+06	0.104751	4.71822e+06	0.101751	2.45568e+06
205-75	0.100221	1.86568e+06	0.0853227	1.84452e+06	0.135188	1.15677e+06	0.0743016	1.1349e+06	0.0942768	1.94278e+06	0.132943	1.02482e+06	0.127466	1.22357e+06	0.114689	3.72576e+06	0.113552	1.99108e+06
205-77	0.114263	3.38516e+06	0.083604	3.22173e+06	0.117308	2.64207e+06	0.0588492	2.01558e+06	0.0988091	7.83145e+06	0.111851	1.81195e+06	0.10201	2.15386e+06	0.0989755	6.37573e+06	0.0827087	3.33009e+06
205-78	0.117207	2.60155e+06	0.0924853	3.05303e+06	0.114687	2.25526e+06	0.0555309	1.29315e+06	0.0792272	3.32063e+06	0.111705	1.69339e+06	0.104421	2.1986e+06	0.0995447	5.22705e+06	0.0851074	3.06963e+06
205-8	0.109138	1.90574e+06	0.0902163	1.74371e+06	0.15242	1.26221e+06	0.0763824	931699	0.0930589	1.73511e+06	0.132801	1.15827e+06	0.123184	1.26189e+06	0.105624	4.08665e+06	0.091191	1.28764e+06
205-80	0.108117	2.16184e+06	0.0907539	2.43624e+06	0.129092	1.86437e+06	0.0758919	1.56961e+06	0.0861776	2.50083e+06	0.126425	1.53177e+06	0.116351	1.63788e+06	0.110185	3.89293e+06	0.0929773	2.87932e+06
205-81	0.108386	2.70735e+06	0.094674	3.87378e+06	0.114734	2.1066e+06	0.052311	1.0344e+06	0.0833787	3.2636e+06	0.116779	1.48642e+06	0.104611	1.57928e+06	0.101023	5.36947e+06	0.0911757	3.16603e+06
205-82	0.107087	3.1305e+06	0.0934894	4.15636e+06	0.115481	2.35974e+06	0.0699788	1.82169e+06	0.0842669	3.24113e+06	0.109754	1.76593e+06	0.10577	2.21972e+06	0.0970794	5.94587e+06	0.0842757	3.07767e+06
205-83	0.110828	2.81341e+06	0.0925322	2.77061e+06	0.129131	1.95764e+06	0.0636487	1.8066e+06	0.105469	5.11743e+06	0.120323	1.38782e+06	0.115046	1.78308e+06	0.104161	4.32457e+06	0.0879975	2.41173e+06
205-84	0.103484	2.64081e+06	0.0921918	3.18985e+06	0.133542	1.8306e+06	0.0668212	1.391e+06	0.0924099	2.68765e+06	0.128103	1.56067e+06	0.113887	1.43594e+06	0.111446	4.31045e+06	0.0876029	2.90354e+06
205-85	0.103631	2.62267e+06	0.0827986	2.13035e+06	0.120538	1.77429e+06	0.0610283	1.61702e+06	0.0821753	2.62648e+06	0.121272	1.57858e+06	0.11349	1.70572e+06	0.104726	4.40834e+06	0.0884196	2.57757e+06
205-86	0.107106	2.64957e+06	0.0939235	3.01121e+06	0.120436	1.82825e+06	0.0654245	1.31661e+06	0.0835673	2.63923e+06	0.114652	1.39159e+06	0.111446	1.66423e+06	0.102107	4.22369e+06	0.0852234	2.45654e+06
205-9	0.107929	1.95912e+06	0.0717999	1.97042e+06	0.132399	1.58246e+06	0.0427549	786938	0.0805498	2.64178e+06	0.116365	1.37425e+06	0.10732	1.55254e+06	0.0979107	4.29495e+06	0.0874708	1.97548e+06
206-1	0.0991224	1.6971e+06	0.0843904	1.72828e+06	0.129787	1.83631e+06	0.0539184	754659	0.108274	6.76432e+06	0.102501	1.07554e+06	0.0973337	1.13992e+06	0.0974944	3.91051e+06	0.0841331	1.44753e+06
206-10	0.1078	1.54576e+06	0.0881561	1.59161e+06	0.141146	1.48015e+06	-1	-1	0.0993772	5.0543e+06	0.116223	1.13066e+06	0.10996	1.15463e+06	0.0945399	3.58258e+06	0.0885265	1.20168e+06
206-11	0.112992	1.2873e+06	0.0809404	1.43845e+06	0.15255	1.24111e+06	0.0680683	1.10834e+06	0.11772	3.39946e+06	0.124091	1.28633e+06	0.114339	832696	0.0983836	3.09972e+06	0.0929371	1.48445e+06
206-120	0.133128	821734	0.0871936	1.47701e+06	0.135991	1.19907e+06	0.0691973	626233	0.111172	4.22169e+06	0.12286	898398	0.121938	1.01257e+06	0.0978457	2.88895e+06	0.0779893	953264
206-121	0.0975856	1.5425e+06	0.0977303	1.31503e+06	0.119383	1.73746e+06	0.0483154	585482	0.0935073	4.48867e+06	0.115608	1.6398e+06	0.105807	1.4021e+06	0.0980255	4.53564e+06	0.0932378	1.58974e+06
206-122	0.0958327	1.34832e+06	0.0923066	2.33792e+06	0.120266	1.99132e+06	0.0663011	1.10476e+06	0.100187	5.81242e+06	0.109649	1.45516e+06	0.105345	1.35389e+06	0.0972185	5.07503e+06	0.100923	2.74308e+06
206-123	0.104966	952646	0.083808	1.25796e+06	0.13182	1.30485e+06	0.0474774	621472	0.111047	4.96276e+06	0.120977	906067	0.119166	1.02535e+06	0.0982579	3.17525e+06	0.0867722	1.13957e+06
206-124	0.106011	1.45639e+06	0.0939542	2.23723e+06	0.12944	1.45342e+06	0.068994	964741	0.105978	4.58813e+06	0.122196	1.26745e+06	0.117797	1.17155e+06	0.0978201	3.91538e+06	0.0981676	1.74816e+06
206-126	0.0982815	1.71764e+06	0.105851	2.98555e+06	0.118939	1.86507e+06	0.0657277	843227	0.103053	7.51849e+06	0.119685	2.01253e+06	0.0981314	966973	0.0941838	5.04951e+06	0.0940883	1.47357e+06
206-127	0.0977584	1.71097e+06	0.086886	1.63774e+06	0.121361	1.70306e+06	0.0525772	1.07029e+06	0.105093	6.92251e+06	0.11501	1.75821e+06	0.107073	1.3514e+06	0.0913145	4.94348e+06	0.0801781	1.43683e+06
206-128	0.106077	1.31565e+06	0.0864827	1.11677e+06	0.132568	1.37106e+06	0.049602	353882	0.109901	3.26627e+06	0.120516	968167	0.117752	1.0365e+06	0.0983305	3.30849e+06	0.085576	1.03006e+06
206-129	0.104164	1.53964e+06	0.0921163	1.93127e+06	0.128676	1.32668e+06	0.0643634	895865	0.110829	4.88853e+06	0.127501	987202	0.116783	1.21433e+06	0.0967861	3.36239e+06	0.103367	1.978e+06
206-13	0.126488	1.12666e+06	0.0734358	1.78551e+06	0.145268	1.30193e+06	0.0538915	1.96683e+06	0.118306	4.48263e+06	0.122004	1.27777e+06	0.110736	994381	0.109058	2.88247e+06	0.0910809	1.45663e+06
206-130	0.109433	1.40547e+06	0.0926367	1.56883e+06	0.129075	1.42131e+06	0.0602053	852982	0.107186	3.60116e+06	0.11013	871832	0.113205	1.29941e+06	0.0977045	3.33321e+06	0.10507	2.02048e+06
206-131	0.100932	1.43616e+06	0.0908957	1.93274e+06	0.130426	1.57606e+06	0.0605452	654979	0.112604	4.65955e+06	0.117933	1.05099e+06	0.11377	1.2546e+06	0.0983675	3.38661e+06	0.083217	1.06059e+06
206-132	0.114056	1.48e+06	0.0887332	1.65292e+06	0.135924	1.30437e+06	0.0726542	732546	0.120792	3.87559e+06	0.12269	957100	0.120264	760582	0.101976	3.78528e+06	0.0973243	1.38603e+06
206-133	0.115642	997792	0.0894351	1.91958e+06	0.142129	1.28493e+06	0.0659329	862323	0.121391	4.04882e+06	0.134848	1.21563e+06	0.114469	696895	0.105619	2.97005e+06	0.0872533	1.02499e+06
206-14	0.0940774	976549	0.0877795	3.77467e+06	0.138888	2.02795e+06	0.0614704	594001	0.102167	7.22954e+06	0.104065	1.08972e+06	0.103316	1.24006e+06	0.0970811	4.7172e+06	0.0977071	1.80703e+06
206-15	0.0949672	1.42246e+06	0.0882579	1.95529e+06	0.127526	2.21046e+06	0.0485015	860928	0.0983965	6.67796e+06	0.108705	1.4886e+06	0.102049	1.17462e+06	0.0953417	4.42774e+06	0.101396	1.86997e+06
206-16	0.112543	1.18296e+06	0.0861653	1.65125e+06	0.140155	1.3771e+06	0.0656724	555991	0.110913	3.83457e+06	0.116938	832258	0.119009	1.17402e+06	0.102377	3.07744e+06	0.0949546	1.17655e+06
206-17	0.108972	940070	0.085761	1.51078e+06	0.144914	1.48927e+06	0.0702148	552035	0.111524	4.20491e+06	0.116324	996604	0.115393	1.04672e+06	0.096538	2.8128e+06	0.0839844	992760
206-18	0.0941629	1.58069e+06	0.0830136	1.74281e+06	0.130721	2.33361e+06	0.0685789	786051	0.105432	6.3761e+06	0.107749	1.42081e+06	0.107449	1.61971e+06	0.0968462	4.01384e+06	0.0868799	1.53914e+06
206-19	0.0955894	1.71745e+06	0.0817009	1.53227e+06	0.126049	2.13263e+06	0.0567215	707036	0.0976721	4.59923e+06	0.107615	1.36509e+06	0.104395	1.29036e+06	0.0909293	4.87069e+06	0.0919821	1.72335e+06
206-21	0.109932	1.19041e+06	0.0802284	1.18001e+06	0.139582	1.33964e+06	0.0598038	349828	0.104444	3.38647e+06	0.121895	1.06651e+06	0.109217	702912	0.0932556	3.19828e+06	0.0848594	796269
206-22	0.102253	1.63515e+06	0.0756064	1.51325e+06	0.140756	1.4788e+06	0.0381722	1.944e+06	0.109935	3.8062e+06	0.114567	1.2681e+06	0.11644	1.282e+06	0.0959856	3.03118e+06	0.0855068	1.31741e+06
206-24	0.104482	912766	0.0706802	914752	0.147441	1.32899e+06	0.0699037	536524	0.112203	3.8832e+06	0.108071	971874	0.110029	1.19681e+06	0.0930066	2.54331e+06	0.102385	1.58507e+06
206-25	0.102263	1.31193e+06	0.0752582	1.43763e+06	0.142959	1.51179e+06	0.0462412	654677	0.110613	4.62087e+06	0.120653	1.53306e+06	0.0998706	971952	0.100021	3.28968e+06	0.0855063	1.20937e+06
206-26	0.112359	1.14835e+06	0.0926738	2.02208e+06	0.143323	1.23474e+06	0.0553142	502065	0.110406	4.50684e+06	0.1254	1.05438e+06	0.121882	972941	0.0987926	2.93598e+06	0.0845756	925687
206-27	0.11783	973291	0.0907282	1.52036e+06	0.146093	1.38474e+06	0.0711613	627249	0.116479	4.03416e+06	0.128932	1.20711e+06	0.120849	980474	0.103403	2.6324e+06	0.0958979	1.2948e+06
206-28	0.0976339	1.86866e+06	0.0885929	2.95861e+06	0.118268	1.90591e+06	0.0653926	730971	0.101303	6.12235e+06	0.117852	1.59538e+06	0.108002	1.61883e+06	0.101064	4.73533e+06	0.135497	1.18075e+06
206-29	0.10037	2.16075e+06	0.0970934	2.15868e+06	0.131837	1.83034e+06	0.0524362	607400	0.098206	4.961e+06	0.114947	1.00461e+06	0.10671	1.61437e+06	0.0935502	4.02997e+06	0.118095	934823
206-3	0.104943	1.40149e+06	0.0887769	1.21139e+06	0.159637	1.05265e+06	0.0736234	613455	0.11272	3.15154e+06	0.11513	932019	0.114203	1.05155e+06	0.107417	2.79214e+06	0.0979794	1.4044e+06
206-30	0.104927	1.0913e+06	0.0944487	1.80066e+06	0.149423	1.12416e+06	0.0666078	540913	0.112422	4.2919e+06	0.109618	601138	0.110999	882537	0.100403	2.69026e+06	0.120153	562576
206-32	0.109802	1.21404e+06	0.0885988	1.60489e+06	0.149774	1.16198e+06	0.0464855	667890	0.11058	2.94891e+06	0.119266	938292	0.109484	952095	0.0984841	2.85066e+06	0.126153	824236
206-33	0.0983565	1.25044e+06	0.0949341	2.15799e+06	0.133348	1.85308e+06	0.051146	1.25107e+06	0.110104	6.28483e+06	0.115674	1.59928e+06	0.102534	1.64455e+06	0.0957314	3.89496e+06	0.121521	854698
206-34	0.0948086	1.91659e+06	0.0878726	2.48272e+06	0.131286	1.81687e+06	0.0517758	967533	0.105599	6.95451e+06	0.113407	1.4162e+06	0.103591	1.72887e+06	0.0940556	5.0742e+06	0.124023	1.2107e+06
206-35	0.114029	820137	0.102756	2.02076e+06	0.158967	1.02172e+06	0.0521867	523739	0.108622	2.68571e+06	0.119661	751312	0.110731	852587	0.104267	2.10262e+06	0.138201	1.05088e+06
206-36	0.116411	1.12036e+06	0.0896775	1.60474e+06	0.148021	1.12516e+06	0.057128	1.0098e+06	0.1082	3.18388e+06	0.123187	909514	0.116293	1.04073e+06	0.0979319	2.56549e+06	0.122418	913134
206-37	0.114212	1.02356e+06	0.092544	1.72849e+06	0.154114	1.18531e+06	0.0481674	725430	0.118471	4.64546e+06	0.105457	736901	0.107711	1.20393e+06	0.107675	2.25765e+06	0.13545	1.23585e+06
206-38	0.0984325	1.36097e+06	0.0906211	1.57666e+06	0.13979	1.43618e+06	0.0512393	658589	0.107534	5.01331e+06	0.115214	876495	0.110379	1.33093e+06	0.0934487	3.21857e+06	0.124656	997514
206-39	0.115374	1.72453e+06	0.0969415	2.84335e+06	0.155353	1.08402e+06	0.0668407	760985	0.117259	4.74032e+06	0.112861	613352	0.118632	908616	0.102378	3.36228e+06	0.131069	1.07491e+06
206-4	0.104691	1.1245e+06	0.0906608	1.94167e+06	0.148213	1.10772e+06	0.0604951	863710	0.106175	4.54907e+06	0.123465	1.05118e+06	0.113781	868551	0.099007	3.37728e+06	0.096212	1.58696e+06
206-40	0.114538	762853	0.0887688	1.79415e+06	0.148736	1.18636e+06	0.0636606	608354	0.115484	3.85892e+06	0.126977	858535	0.12119	1.07028e+06	0.0938679	2.63311e+06	0.128131	990320
206-41	0.100248	1.21258e+06	0.0825897	1.67992e+06	0.132428	1.66531e+06	-1	-1	0.105824	5.00367e+06	0.0978752	898651	0.108431	1.29389e+06	0.0982961	3.82342e+06	0.122421	740445
206-42	0.101015	1.60001e+06	0.0822279	2.29831e+06	0.135201	1.6786e+06	0.0629417	768419	0.102176	5.88326e+06	0.115151	1.37938e+06	0.107294	1.32339e+06	0.0955014	4.36377e+06	0.123379	1.31091e+06
206-43	0.116531	662386	0.0849275	1.40864e+06	0.150378	1.08857e+06	0.0558202	444302	0.106696	2.90485e+06	0.122094	746885	0.118264	1.02913e+06	0.0992799	2.56105e+06	0.12868	838978
206-44	0.107489	1.04919e+06	0.0798533	2.43946e+06	0.138519	1.37629e+06	0.045807	1.09764e+06	0.108855	5.3103e+06	0.111658	1.52584e+06	0.112145	1.29002e+06	0.100183	3.42172e+06	0.124859	1.67719e+06
206-46	0.0967474	1.33282e+06	0.0853341	1.55283e+06	0.132445	1.89963e+06	0.0535813	557957	0.105715	6.38641e+06	0.113838	1.29352e+06	0.105398	1.31666e+06	0.0950212	4.42425e+06	0.114201	891022
206-5	0.0962307	1.43942e+06	0.0910352	1.98457e+06	0.1316	1.70933e+06	0.0565621	1.08417e+06	0.103531	5.84636e+06	0.112366	1.31712e+06	0.105628	1.42941e+06	0.100668	3.95955e+06	0.0751335	1.19329e+06
206-51	0.123193	898623	0.0830468	1.83662e+06	0.157012	937548	0.0668756	496926	0.106706	3.20374e+06	0.124534	744182	0.115669	673473	0.100562	2.9536e+06	0.1378	1.01909e+06
206-52	0.115917	1.17014e+06	0.0830889	1.87961e+06	0.155896	900428	0.0781069	840156	0.107812	3.75125e+06	0.124903	692816	0.127964	1.0144e+06	0.097086	3.15255e+06	0.125734	885617
206-53	0.101462	1.30166e+06	0.0887544	2.09992e+06	0.117591	1.85137e+06	0.0712372	866198	0.0964599	6.89829e+06	0.107995	1.31556e+06	0.110173	1.57335e+06	0.0989994	4.31368e+06	0.0909148	1.07764e+06
206-55	0.11344	931267	0.0923305	1.37694e+06	0.1434	1.00702e+06	0.0540781	515514	0.115468	3.14565e+06	0.119694	1.02795e+06	0.119529	1.08726e+06	0.106761	2.09092e+06	0.0949445	894829
206-56	0.115729	879155	0.090284	1.07328e+06	0.137675	1.0798e+06	0.0713629	722171	0.117874	3.73347e+06	0.116557	795035	0.110536	760199	0.100848	2.383e+06	0.100144	1.3079e+06
206-57	0.098326	1.59706e+06	0.0863549	1.45152e+06	0.12029	1.82316e+06	0.0624799	1.5729e+06	0.109367	4.78056e+06	0.113787	1.48304e+06	0.100101	1.02265e+06	0.0972445	4.11531e+06	0.0942201	1.29515e+06
206-59	0.109331	1.13432e+06	0.0938052	1.33183e+06	0.129876	1.27866e+06	0.0634466	978822	0.113944	4.17084e+06	0.121251	1.03483e+06	0.120704	1.15808e+06	0.10463	3.21824e+06	0.101664	1.25623e+06
206-6	0.0977579	1.45801e+06	0.0884692	1.473e+06	0.129128	1.84111e+06	0.0406976	681965	0.101078	4.48646e+06	0.112811	1.34074e+06	0.106179	1.61433e+06	0.106593	3.98986e+06	0.083741	1.45453e+06
206-60	0.112854	1.33946e+06	0.0972377	1.77105e+06	0.130448	1.19896e+06	0.076939	765573	0.111981	3.18584e+06	0.118592	951171	0.119842	982765	0.0989126	2.92451e+06	0.101519	1.26485e+06
206-61	0.109346	1.67548e+06	0.0872922	1.69514e+06	0.126701	1.24951e+06	0.0625767	552055	0.109757	3.45921e+06	0.121686	976178	0.10467	723871	0.0985699	3.02829e+06	0.101217	1.34684e+06
206-62	0.09758	955180	0.0933186	1.61084e+06	0.125618	1.42445e+06	0.0502435	546761	0.100971	4.37771e+06	0.118618	1.03245e+06	0.118818	1.27177e+06	0.0936881	4.02362e+06	0.0866733	1.00869e+06
206-63	0.113679	623373	0.096716	1.53014e+06	0.145808	959972	0.0704449	761048	0.117592	4.27055e+06	0.124077	839774	0.125822	834091	0.103426	2.57443e+06	0.0886735	662966
206-64	0.117125	864644	0.0813618	1.37132e+06	0.133457	1.19005e+06	0.051197	467577	0.11324	4.19574e+06	0.123711	926989	0.131277	1.12845e+06	0.093636	2.82162e+06	0.0942804	929251
206-65	0.087708	990004	0.0890645	2.2319e+06	0.104088	2.26458e+06	0.0484316	520547	0.106642	7.60182e+06	0.111404	1.64951e+06	0.104697	1.46636e+06	0.0992799	4.40641e+06	0.10284	2.02814e+06
206-66	0.0913849	1.19315e+06	0.0878865	2.21764e+06	0.118696	2.11593e+06	0.0552631	1.14472e+06	0.104096	6.04265e+06	0.110428	1.62033e+06	0.107775	1.65493e+06	0.096471	4.38636e+06	0.0965945	1.7007e+06
206-67	0.11747	972260	0.0883709	1.61186e+06	0.132684	1.15998e+06	0.0581698	718575	0.111326	4.11415e+06	0.114942	895160	0.115183	985552	0.0969971	3.39278e+06	0.104405	1.37475e+06
206-68	0.106344	1.38817e+06	0.0816905	1.24073e+06	0.126494	1.10319e+06	0.0648221	873249	0.113517	4.5483e+06	0.122548	1.08259e+06	0.118002	1.06805e+06	0.0972916	3.1403e+06	0.0971595	968234
206-69	0.0990998	1.93541e+06	0.0891456	2.10794e+06	0.114537	2.35348e+06	0.0506555	856437	0.105494	6.83646e+06	0.109377	1.38139e+06	0.102509	1.38364e+06	0.0957282	4.17701e+06	0.0944295	1.39042e+06
206-7	0.116499	973358	0.0955083	1.84804e+06	0.14635	1.11892e+06	0.0523255	810173	0.114774	3.88054e+06	0.114845	956091	0.116361	986244	0.106639	2.8453e+06	0.0737759	750872
206-70	0.0989118	1.82588e+06	0.0931734	2.21134e+06	0.11738	1.90635e+06	0.0528327	447096	0.101294	5.27994e+06	0.102257	1.24673e+06	0.102479	1.24162e+06	0.102542	5.06673e+06	0.107552	1.84491e+06
206-71	0.109756	1.70677e+06	0.0890857	2.08186e+06	0.127258	1.35103e+06	0.0590534	1.03075e+06	0.112338	5.2708e+06	0.118132	1.00292e+06	0.113821	1.17092e+06	0.105361	3.70788e+06	0.103469	1.84912e+06
206-72	0.111776	1.50571e+06	0.099002	3.48429e+06	0.121816	1.31886e+06	0.0379663	1.25783e+06	0.109614	4.33286e+06	0.106175	758278	0.107009	883957	0.103035	3.27878e+06	0.0829837	955346
206-73	0.0991638	1.07575e+06	0.0823182	1.85117e+06	0.123645	1.51383e+06	0.0548059	607983	0.111051	4.97261e+06	0.121085	1.30264e+06	0.104389	856011	0.101018	3.66124e+06	0.0828395	749591
206-74	0.0982404	1.17116e+06	0.0884889	2.07627e+06	0.123055	1.45551e+06	0.0548125	838114	0.109023	5.59702e+06	0.116842	1.18487e+06	0.109786	1.23528e+06	0.0987123	3.67662e+06	0.0991838	1.39737e+06
206-75	0.10318	1.4569e+06	0.0818879	1.6029e+06	0.132256	1.03292e+06	0.0607619	760579	0.116402	4.5377e+06	0.127349	888003	0.123647	918891	0.101182	3.35288e+06	0.110142	1.26002e+06
206-77	0.103301	1.96049e+06	0.0884776	2.15587e+06	0.124002	2.0212e+06	0.0522757	806911	0.0981914	5.6711e+06	0.108967	1.74388e+06	0.100392	1.31456e+06	0.0931184	4.68257e+06	0.087435	1.64606e+06
206-78	0.102248	1.83917e+06	0.0892372	1.83932e+06	0.116362	1.73454e+06	0.0501416	478020	0.100772	4.77756e+06	0.109704	1.72928e+06	0.108296	1.54652e+06	0.0959342	4.32962e+06	0.0865502	1.56755e+06
206-8	0.108596	1.34289e+06	0.0821678	1.70937e+06	0.152805	1.14903e+06	0.0571603	413549	0.118277	3.92945e+06	0.126439	1.17722e+06	0.116072	1.04927e+06	0.0973955	3.71716e+06	0.0790518	937478
206-80	0.111445	1.21886e+06	0.0892379	1.8416e+06	0.127459	1.40811e+06	0.0591074	1.39336e+06	0.111219	4.45823e+06	0.123127	1.35752e+06	0.114765	1.05862e+06	0.100206	2.95896e+06	0.0933619	1.75519e+06
206-81	0.104186	1.91945e+06	0.0939176	2.54681e+06	0.124479	1.86386e+06	0.0575289	670746	0.102513	5.88758e+06	0.109614	1.35404e+06	0.102626	1.20156e+06	0.106134	4.04573e+06	0.0956552	2.12672e+06
206-82	0.103605	1.68445e+06	0.094827	3.01363e+06	0.119417	1.89097e+06	0.0636267	793372	0.104593	5.53775e+06	0.109025	1.25944e+06	0.108313	1.70263e+06	0.0970536	3.85265e+06	0.0849943	1.38939e+06
206-83	0.116087	1.50843e+06	0.0905501	1.86797e+06	0.129042	1.43619e+06	0.0563636	1.23043e+06	0.109272	3.65451e+06	0.119238	1.31524e+06	0.114753	1.16152e+06	0.102453	3.46169e+06	0.0798078	1.35861e+06
206-84	0.106822	1.13863e+06	0.0892497	1.94389e+06	0.135737	1.36871e+06	0.0643595	598407	0.114226	4.07422e+06	0.126308	1.23422e+06	0.110061	808860	0.104292	3.0804e+06	0.0851051	1.4095e+06
206-85	0.10395	1.35848e+06	0.0879331	1.65819e+06	0.125292	1.42045e+06	0.0582938	822604	0.103238	3.32141e+06	0.121231	1.44999e+06	0.115235	1.31511e+06	0.10187	3.38035e+06	0.0885291	1.23432e+06
206-86	0.10402	1.38393e+06	0.0883532	1.58885e+06	0.124255	1.30565e+06	0.0614901	698952	0.108497	4.75536e+06	0.114249	1.14043e+06	0.112503	1.3329e+06	0.100773	3.25361e+06	0.0854358	1.41943e+06
206-9	0.0987221	996863	0.074773	1.21711e+06	0.144715	1.22635e+06	0.0539231	567651	0.113557	5.05757e+06	0.117956	1.02185e+06	0.110429	1.15522e+06	0.0981118	3.50693e+06	0.0827314	868952
207-1	0.103588	2.71246e+06	0.073493	3.3031e+06	0.128214	2.39981e+06	0.0652906	2.30253e+06	0.111627	8.09424e+06	0.104046	1.82497e+06	0.0944073	1.97791e+06	0.101329	5.97741e+06	0.0808328	2.45392e+06
207-10	0.123594	2.57056e+06	0.0692158	2.61144e+06	0.136881	1.93312e+06	0.0579675	2.11233e+06	0.102593	6.68022e+06	0.111919	1.89969e+06	0.105236	1.91839e+06	0.0973833	5.08599e+06	0.080461	1.98018e+06
207-11	0.123936	2.43944e+06	0.0720079	2.6394e+06	0.150099	1.86945e+06	0.0763183	2.12577e+06	0.11727	6.25789e+06	0.11947	1.75484e+06	0.112785	1.74901e+06	0.105869	4.64696e+06	0.0905713	2.1221e+06
207-120	0.131446	1.11845e+06	0.0769951	1.05383e+06	0.138957	1.08039e+06	0.0642704	1.39818e+06	0.113942	4.14897e+06	0.128324	1.02162e+06	0.12738	950029	0.10102	3.48587e+06	0.0822331	1.47308e+06
207-121	0.104585	3.19376e+06	0.0769922	2.87979e+06	0.113958	2.85537e+06	0.0539836	1.5633e+06	0.104014	7.07156e+06	0.110177	1.6901e+06	0.104215	2.14745e+06	0.0974849	6.48867e+06	0.0859935	2.16563e+06
207-122	0.100839	2.5106e+06	0.0766847	3.04221e+06	0.110479	3.20635e+06	0.0750713	2.02764e+06	0.0996722	7.82473e+06	0.109055	1.69225e+06	0.102106	2.10792e+06	0.100686	6.30276e+06	0.0874149	2.85557e+06
207-123	0.114206	1.7755e+06	0.0699826	1.94766e+06	0.131288	2.15811e+06	0.0474605	1.44474e+06	0.113394	5.78178e+06	0.122565	1.35304e+06	0.116279	1.75192e+06	0.104231	4.64927e+06	0.0797538	1.48801e+06
207-124	0.113884	2.25282e+06	0.0821463	2.57e+06	0.12777	1.67382e+06	0.0726352	1.71983e+06	0.109829	5.54687e+06	0.122494	1.19791e+06	0.118571	1.441e+06	0.0977404	4.65391e+06	0.0936566	2.09726e+06
207-126	0.0999198	2.43989e+06	0.0760329	1.95335e+06	0.118819	2.07131e+06	0.0716976	1.97312e+06	0.100689	7.9975e+06	0.121344	1.63606e+06	0.104488	1.43281e+06	0.0925882	6.86772e+06	0.0830518	1.42067e+06
207-127	0.101122	3.26822e+06	0.066819	2.37159e+06	0.110952	3.40521e+06	0.0562418	1.79903e+06	0.106117	8.49623e+06	0.110954	2.17777e+06	0.101448	2.36939e+06	0.0958739	6.53405e+06	0.0773733	2.0744e+06
207-128	0.118024	2.1226e+06	0.0730798	1.77155e+06	0.131554	1.97195e+06	0.0518004	911686	0.11199	5.17399e+06	0.11694	1.1e+06	0.116145	1.57551e+06	0.10071	4.15431e+06	0.0870718	1.5092e+06
207-129	0.110514	1.70843e+06	0.0901832	2.27757e+06	0.129086	1.20251e+06	0.0659374	1.79261e+06	0.109307	6.35207e+06	0.132067	1.25448e+06	0.123868	1.11348e+06	0.0980856	4.36514e+06	0.093344	1.85654e+06
207-13	0.131965	1.59673e+06	0.0716127	2.2e+06	0.144649	1.53378e+06	0.059281	2.19919e+06	0.12068	5.97398e+06	0.116592	1.53178e+06	0.111468	1.42197e+06	0.113122	4.25361e+06	0.079762	1.78722e+06
207-130	0.11382	2.5369e+06	0.0776775	2.44523e+06	0.126199	2.22936e+06	0.0669938	1.82265e+06	0.109271	5.72616e+06	0.106011	1.08723e+06	0.113335	1.77029e+06	0.102859	4.72783e+06	0.0936601	2.41972e+06
207-131	0.111338	2.59246e+06	0.0769962	2.14183e+06	0.122664	2.40817e+06	0.0577888	1.84662e+06	0.110622	6.18869e+06	0.113307	1.35122e+06	0.109785	1.71474e+06	0.104523	4.85332e+06	0.0796905	1.62846e+06
207-132	0.130814	2.78166e+06	0.0756426	2.51289e+06	0.135119	2.29385e+06	0.0666519	1.73329e+06	0.114757	5.99985e+06	0.122894	1.43933e+06	0.11771	2.04479e+06	0.105961	4.83866e+06	0.0895004	2.24235e+06
207-133	0.119272	1.49597e+06	0.0812739	2.70566e+06	0.140869	1.937e+06	0.0712486	1.69792e+06	0.118041	5.22427e+06	0.127697	1.15933e+06	0.114016	1.12387e+06	0.10936	4.10631e+06	0.085298	1.42702e+06
207-14	0.0989783	3.01987e+06	0.0826226	4.933e+06	0.130814	2.67769e+06	0.0635204	2.07421e+06	0.103877	8.11063e+06	0.107543	2.02289e+06	0.0983011	2.24733e+06	0.0995374	6.93047e+06	0.0766435	2.32455e+06
207-15	0.103678	2.20829e+06	0.084167	2.84e+06	0.129079	2.14385e+06	0.0582671	1.87008e+06	0.0958018	7.5879e+06	0.114172	1.45147e+06	0.107266	1.31998e+06	0.0946457	6.18067e+06	0.0911777	1.90726e+06
207-16	0.116466	1.82542e+06	0.0792899	2.204e+06	0.143199	1.53544e+06	0.0627464	1.20292e+06	0.110935	5.43942e+06	0.118286	1.15744e+06	0.118864	1.5658e+06	0.104849	4.32084e+06	0.0922738	1.93152e+06
207-17	0.12534	1.80978e+06	0.0746075	2.08879e+06	0.143957	1.72308e+06	0.0609778	1.42879e+06	0.112337	6.02565e+06	0.110259	1.13159e+06	0.111154	1.68178e+06	0.106833	4.26251e+06	0.0803283	1.9306e+06
207-18	0.101987	2.59975e+06	0.0754614	2.28602e+06	0.127445	2.68961e+06	0.0604701	1.847e+06	0.102924	8.27819e+06	0.104578	1.78997e+06	0.0999961	2.4341e+06	0.101759	6.03658e+06	0.0782362	2.28149e+06
207-19	0.106411	2.45425e+06	0.0714683	1.89895e+06	0.126769	2.30204e+06	0.062829	1.81396e+06	0.10237	7.5136e+06	0.111038	1.61431e+06	0.10359	1.71291e+06	0.0940036	6.04629e+06	0.0860428	2.21538e+06
207-21	0.112563	1.70799e+06	0.0798547	1.24429e+06	0.139708	1.34126e+06	0.051798	628411	0.0981936	4.46753e+06	0.123521	1.08667e+06	0.105812	904381	0.0920563	4.55303e+06	0.0750311	815685
207-22	0.119394	2.65374e+06	0.0670829	2.15037e+06	0.139822	2.04077e+06	0.0663457	1.90014e+06	0.115474	6.99508e+06	0.113514	1.65085e+06	0.110497	2.2561e+06	0.101374	4.62133e+06	0.0795484	2.41382e+06
207-24	0.103389	1.11003e+06	0.0688762	1.15276e+06	0.138451	1.62623e+06	0.0599624	1.69744e+06	0.10369	5.70953e+06	0.114471	1.3073e+06	0.114689	1.36075e+06	0.0955423	4.07157e+06	0.0863752	1.29847e+06
207-25	0.102925	1.7829e+06	0.0646026	1.92451e+06	0.13523	1.8967e+06	0.0581372	1.36102e+06	0.105015	6.46463e+06	0.118119	1.4892e+06	0.100581	1.55942e+06	0.0999295	4.50173e+06	0.0756697	1.63327e+06
207-26	0.112478	1.69231e+06	0.0870113	2.89211e+06	0.146525	1.35282e+06	0.0670554	1.08872e+06	0.112367	5.86931e+06	0.119982	946163	0.121939	1.2733e+06	0.103755	4.36198e+06	0.0825068	1.43921e+06
207-27	0.121448	1.85095e+06	0.0729609	2.24737e+06	0.148389	1.65705e+06	0.0705345	1.51296e+06	0.118084	5.70782e+06	0.119787	1.30817e+06	0.116812	1.64836e+06	0.108374	4.35876e+06	0.0877873	2.17158e+06
207-28	0.1056	2.61044e+06	0.0864571	3.42329e+06	0.137696	1.93332e+06	0.0725771	1.58133e+06	0.0987969	7.56112e+06	0.117136	1.74063e+06	0.108272	1.82009e+06	0.0951917	6.60914e+06	0.133287	1.37648e+06
207-29	0.106408	2.65188e+06	0.0847963	2.69995e+06	0.132234	2.05582e+06	0.0649073	1.21092e+06	0.0920375	7.30403e+06	0.112729	1.4384e+06	0.109491	1.82892e+06	0.0931206	5.72228e+06	0.126516	1.36686e+06
207-3	0.114814	2.45954e+06	0.0774838	2.10838e+06	0.145209	1.60528e+06	0.0694782	1.80357e+06	0.112257	5.60185e+06	0.117932	1.26207e+06	0.113835	1.63032e+06	0.108813	4.19902e+06	0.087867	2.24423e+06
207-30	0.113941	1.96088e+06	0.0868222	2.48493e+06	0.144982	1.53344e+06	0.0464414	1.28844e+06	0.114265	5.04172e+06	0.11077	1.08869e+06	0.109448	1.32116e+06	0.111163	3.77881e+06	0.100983	1.07986e+06
207-32	0.120445	1.86488e+06	0.079729	2.22877e+06	0.14371	1.64978e+06	0.0582732	1.39442e+06	0.10772	4.92217e+06	0.116164	1.33464e+06	0.108577	1.33796e+06	0.102574	4.16932e+06	0.125006	1.54663e+06
207-33	0.0952573	2.21914e+06	0.0694137	2.9033e+06	0.124933	2.81729e+06	0.0499322	1.91615e+06	0.110411	7.98442e+06	0.101723	2.53461e+06	0.0977263	2.25119e+06	0.105096	6.01115e+06	0.113674	1.58762e+06
207-34	0.097803	3.90643e+06	0.0712135	3.40072e+06	0.121901	3.1611e+06	0.0642108	1.69878e+06	0.113691	8.74908e+06	0.0990088	2.62837e+06	0.0984054	2.57499e+06	0.0991636	6.75054e+06	0.12172	2.34674e+06
207-35	0.109603	1.7695e+06	0.0855342	2.78967e+06	0.147892	1.62954e+06	0.0736557	1.5322e+06	0.115179	5.3994e+06	0.119113	1.29467e+06	0.110074	1.30365e+06	0.106352	3.95474e+06	0.119439	1.44956e+06
207-36	0.122562	1.85465e+06	0.0764458	2.24431e+06	0.14066	1.72253e+06	0.0628124	1.75132e+06	0.122164	5.87217e+06	0.118454	1.3723e+06	0.114529	1.47172e+06	0.112945	3.84007e+06	0.116349	1.36297e+06
207-37	0.110677	2.42859e+06	0.0752599	2.93373e+06	0.135679	2.19874e+06	0.0575623	1.71557e+06	0.108496	6.60854e+06	0.109558	1.98978e+06	0.104805	1.89503e+06	0.111289	4.40075e+06	0.124551	1.97236e+06
207-38	0.105404	1.7893e+06	0.0765242	2.07141e+06	0.137629	1.67946e+06	0.0602255	1.19359e+06	0.103715	5.711e+06	0.115066	1.48226e+06	0.111156	1.5205e+06	0.0975491	4.41047e+06	0.129979	1.31059e+06
207-39	0.120722	3.28236e+06	0.0928185	4.51699e+06	0.145288	1.80611e+06	0.07286	1.79445e+06	0.118307	6.64945e+06	0.117399	1.69569e+06	0.114113	1.57082e+06	0.106788	5.08676e+06	0.126752	2.08251e+06
207-4	0.110355	2.06942e+06	0.0829477	3.15095e+06	0.144645	1.54993e+06	0.0558479	2.4858e+06	0.109287	6.00854e+06	0.119983	1.28222e+06	0.111509	1.43224e+06	0.105248	4.60768e+06	0.0888393	2.22257e+06
207-40	0.117819	929252	0.0855346	1.66639e+06	0.151581	1.04576e+06	0.0598737	1.13888e+06	0.11419	4.57771e+06	0.124763	992511	0.125233	1.06947e+06	0.0997518	3.14786e+06	0.124489	636594
207-41	0.0956744	1.57805e+06	0.0801635	2.23133e+06	0.136097	1.73679e+06	0.0603635	885471	0.103656	6.33911e+06	0.107716	930655	0.113705	1.31305e+06	0.101806	5.56207e+06	0.118577	615150
207-42	0.110476	3.24293e+06	0.0711009	3.32398e+06	0.128189	2.2614e+06	0.0706304	2.06729e+06	0.099954	8.01792e+06	0.105172	2.02586e+06	0.101083	2.01493e+06	0.0971436	5.88945e+06	0.11871	2.08892e+06
207-43	0.118077	1.83439e+06	0.0751876	3.02278e+06	0.141297	1.81586e+06	0.0621186	1.57375e+06	0.110338	5.93766e+06	0.11324	1.90956e+06	0.109903	1.77973e+06	0.110023	4.20359e+06	0.103668	1.38074e+06
207-44	0.105841	1.87491e+06	0.0662649	3.03007e+06	0.142681	2.04747e+06	0.0585659	1.51636e+06	0.108118	6.5176e+06	0.113275	1.96277e+06	0.110615	2.02132e+06	0.100957	4.77828e+06	0.121488	2.03683e+06
207-46	0.0979605	2.63577e+06	0.0655	2.66147e+06	0.12679	2.67815e+06	0.0615895	1.89941e+06	0.107586	8.26745e+06	0.102466	2.68684e+06	0.0977696	2.40144e+06	0.101907	6.27727e+06	0.103612	1.40831e+06
207-5	0.0991665	2.36124e+06	0.0699001	2.64461e+06	0.129951	2.28871e+06	0.0696409	2.34988e+06	0.10267	7.78456e+06	0.108019	2.02436e+06	0.0991717	2.30329e+06	0.10099	6.09842e+06	0.0776655	1.96287e+06
207-51	0.125759	1.17926e+06	0.0738258	1.46154e+06	0.161292	981126	0.077378	726880	0.109143	4.52949e+06	0.127633	681087	0.125797	756158	0.0988611	3.8253e+06	0.138134	1.05038e+06
207-52	0.124615	1.83963e+06	0.0800885	2.61038e+06	0.153221	1.09488e+06	0.0797678	1.68179e+06	0.105366	5.42027e+06	0.11893	1.07467e+06	0.127918	1.22956e+06	0.102018	3.80111e+06	0.116717	1.06459e+06
207-53	0.096428	1.70811e+06	0.0801938	3.06696e+06	0.117427	2.26866e+06	0.0881902	1.64008e+06	0.0939481	7.18917e+06	0.110155	1.25771e+06	0.113831	1.89003e+06	0.0932478	6.38865e+06	0.093751	1.5506e+06
207-55	0.113237	2.25229e+06	0.0792639	2.70666e+06	0.130073	2.02194e+06	0.0620408	1.68584e+06	0.112445	6.05444e+06	0.117933	1.98415e+06	0.115445	1.97545e+06	0.106277	4.45377e+06	0.0871411	1.82759e+06
207-56	0.124122	1.59337e+06	0.0764502	2.1405e+06	0.123568	2.10694e+06	0.0660977	1.99282e+06	0.1114	5.91301e+06	0.109269	1.64465e+06	0.107109	1.6881e+06	0.108715	4.07776e+06	0.0926001	2.08717e+06
207-57	0.103831	2.59884e+06	0.0769165	2.44831e+06	0.117122	2.55321e+06	0.0714077	1.96544e+06	0.102313	7.02019e+06	0.111581	1.91033e+06	0.0997849	1.76531e+06	0.0978304	5.98497e+06	0.0946051	2.02133e+06
207-59	0.115803	1.39209e+06	0.0893949	2.05012e+06	0.130167	1.46815e+06	0.0794315	1.50468e+06	0.10935	4.45058e+06	0.123248	1.11127e+06	0.123158	1.20774e+06	0.102857	4.02034e+06	0.0999654	1.34046e+06
207-6	0.108366	2.80483e+06	0.0723305	2.80129e+06	0.127889	2.36198e+06	0.0671656	1.99397e+06	0.101513	8.1669e+06	0.109027	2.16106e+06	0.10053	2.44197e+06	0.0903947	6.28546e+06	0.0786992	2.13641e+06
207-60	0.114885	1.8129e+06	0.0834525	2.1431e+06	0.130194	1.61209e+06	0.0830968	1.74065e+06	0.112695	5.14854e+06	0.121984	1.07352e+06	0.124496	1.12278e+06	0.102298	4.24106e+06	0.0973058	1.90551e+06
207-61	0.116453	2.3989e+06	0.0831061	2.53922e+06	0.122747	1.83069e+06	0.0672676	1.57794e+06	0.107048	6.19875e+06	0.113934	1.38916e+06	0.107411	1.48168e+06	0.0996564	4.83324e+06	0.1	2.24362e+06
207-62	0.112393	1.86558e+06	0.0794485	2.28812e+06	0.122038	1.8863e+06	0.0587437	1.5114e+06	0.105595	6.14435e+06	0.11491	1.38849e+06	0.116472	1.86396e+06	0.102948	4.65252e+06	0.0905526	1.7489e+06
207-63	0.117971	1.14165e+06	0.0946891	2.46465e+06	0.139438	1.23498e+06	0.0677024	1.33924e+06	0.11328	4.81025e+06	0.124028	982462	0.134424	1.05938e+06	0.105948	3.69736e+06	0.0841228	976841
207-64	0.124838	896046	0.0808056	1.39116e+06	0.137111	1.0692e+06	0.0570216	1.0544e+06	0.111533	4.27101e+06	0.130682	915444	0.131875	1.00158e+06	0.100462	3.62532e+06	0.0848888	937952
207-65	0.100922	2.13634e+06	0.0799502	2.69312e+06	0.113359	2.29847e+06	0.0521303	1.89616e+06	0.107368	7.52559e+06	0.109892	1.78333e+06	0.105207	2.11313e+06	0.0991493	6.23085e+06	0.0907578	2.00944e+06
207-66	0.0987385	2.69487e+06	0.0738364	2.74266e+06	0.111226	2.91455e+06	0.0726708	1.97296e+06	0.104269	7.87409e+06	0.10965	2.03187e+06	0.102655	2.36854e+06	0.099079	6.34406e+06	0.0912775	2.05241e+06
207-67	0.116489	1.44181e+06	0.0869646	2.12451e+06	0.133054	1.29671e+06	0.0826935	1.43999e+06	0.105457	4.83318e+06	0.117842	997582	0.121446	1.2692e+06	0.0993832	4.23201e+06	0.0948385	1.62696e+06
207-68	0.112598	1.63382e+06	0.0782923	1.28317e+06	0.128112	1.14506e+06	0.0703368	1.21505e+06	0.108526	5.07234e+06	0.119366	1.08751e+06	0.123616	1.19073e+06	0.0990183	3.97955e+06	0.0910724	1.05051e+06
207-69	0.101132	2.56754e+06	0.0760257	2.5629e+06	0.114593	2.49603e+06	0.0723704	1.66244e+06	0.103678	7.3884e+06	0.110813	1.57105e+06	0.10441	1.82682e+06	0.103341	5.54091e+06	0.0905879	1.81652e+06
207-7	0.125237	1.80467e+06	0.0866016	3.07254e+06	0.144484	1.48105e+06	0.0655884	1.72914e+06	0.115602	5.27143e+06	0.114998	1.19353e+06	0.115255	1.49638e+06	0.111383	4.04379e+06	0.0747086	1.35814e+06
207-70	0.10831	2.89388e+06	0.0892163	3.32901e+06	0.112866	2.41743e+06	0.0661234	1.30035e+06	0.094425	7.99302e+06	0.109072	1.21508e+06	0.108714	1.70966e+06	0.0954435	6.64562e+06	0.10458	2.0658e+06
207-71	0.117779	2.34742e+06	0.076772	2.3329e+06	0.123921	1.82745e+06	0.0661656	1.80607e+06	0.111539	5.84719e+06	0.113425	1.20933e+06	0.112488	1.45793e+06	0.105662	4.65593e+06	0.0910083	2.45615e+06
207-72	0.122399	2.3593e+06	0.0773251	1.97496e+06	0.124665	1.89027e+06	0.0759068	1.66794e+06	0.114584	5.81313e+06	0.121626	1.52469e+06	0.115581	1.60986e+06	0.106633	4.21673e+06	0.0838491	1.5754e+06
207-73	0.104661	2.26741e+06	0.0706633	2.04572e+06	0.119921	2.10418e+06	0.0628765	1.71931e+06	0.106528	6.02222e+06	0.118351	1.60218e+06	0.104445	1.48481e+06	0.0994067	5.02901e+06	0.0847328	1.2873e+06
207-74	0.105681	2.55607e+06	0.0719177	2.70134e+06	0.115021	2.43681e+06	0.0600197	1.87279e+06	0.107329	7.14147e+06	0.112314	1.98355e+06	0.105344	2.05024e+06	0.104406	5.34498e+06	0.0894259	2.3218e+06
207-75	0.111695	2.0096e+06	0.0781563	1.92051e+06	0.134998	1.29835e+06	0.0790639	1.27745e+06	0.111229	5.17162e+06	0.129261	994703	0.126198	1.24226e+06	0.102878	4.39185e+06	0.107446	1.831e+06
207-77	0.106121	3.18996e+06	0.0775012	2.85881e+06	0.114563	3.07107e+06	0.0668693	2.06613e+06	0.103082	7.88129e+06	0.104652	2.06763e+06	0.0932612	2.17452e+06	0.0945488	6.87408e+06	0.0726764	3.0817e+06
207-78	0.112213	2.46763e+06	0.0841273	2.47801e+06	0.11351	2.5214e+06	0.0622082	1.67206e+06	0.103717	6.71969e+06	0.110838	1.65218e+06	0.104427	2.03268e+06	0.100387	5.61542e+06	0.0791177	2.68285e+06
207-8	0.11913	1.52693e+06	0.0797681	1.81373e+06	0.152907	1.19442e+06	0.0753724	1.2407e+06	0.109958	5.08244e+06	0.1288	1.25327e+06	0.120392	1.16658e+06	0.0955741	4.60403e+06	0.0794055	1.19809e+06
207-80	0.11537	1.97798e+06	0.0819497	2.57669e+06	0.127364	2.36173e+06	0.072714	1.93121e+06	0.110709	5.81088e+06	0.120546	1.81753e+06	0.111295	2.08789e+06	0.106924	4.63271e+06	0.0820665	2.92335e+06
207-81	0.109432	2.48624e+06	0.0887353	3.10325e+06	0.117808	2.24574e+06	0.0611765	1.48003e+06	0.098946	7.01004e+06	0.115432	1.47227e+06	0.104754	1.53791e+06	0.10432	5.49963e+06	0.0833525	2.82019e+06
207-82	0.110979	2.95036e+06	0.0896267	3.77992e+06	0.114867	2.70525e+06	0.065106	1.7613e+06	0.102437	7.74829e+06	0.106941	1.65687e+06	0.106287	2.21932e+06	0.0981124	6.27051e+06	0.0758633	2.47516e+06
207-83	0.120916	2.71337e+06	0.0864661	2.87048e+06	0.129175	2.39904e+06	0.0677606	1.74485e+06	0.106706	5.41224e+06	0.112861	1.56153e+06	0.111692	2.25594e+06	0.102601	5.04391e+06	0.0778458	2.49085e+06
207-84	0.114087	2.0442e+06	0.0867309	2.69245e+06	0.129707	1.94614e+06	0.0665955	1.34759e+06	0.110633	5.71413e+06	0.12417	1.31018e+06	0.109928	1.29001e+06	0.104558	4.45442e+06	0.078032	2.51186e+06
207-85	0.112076	2.17026e+06	0.0776946	1.70365e+06	0.122351	1.74847e+06	0.064918	1.69389e+06	0.106666	5.07502e+06	0.117799	1.36565e+06	0.112512	1.60496e+06	0.102602	4.3934e+06	0.0801033	2.13219e+06
207-86	0.112701	2.27313e+06	0.0879638	2.58579e+06	0.121788	1.94981e+06	0.0681075	1.8351e+06	0.106526	5.69941e+06	0.109663	1.274e+06	0.110796	1.65805e+06	0.102548	4.65169e+06	0.0763011	2.20748e+06
207-9	0.106182	1.88517e+06	0.0644314	1.79741e+06	0.139517	1.65306e+06	0.063768	1.50536e+06	0.107383	6.10849e+06	0.11697	1.57871e+06	0.109744	1.63384e+06	0.103902	4.78907e+06	0.0773066	1.6871e+06
208-1	0.100855	3.11452e+06	0.081422	2.69134e+06	0.124952	2.43201e+06	0.0585774	1.54373e+06	0.07592	3.1205e+06	0.110213	1.79361e+06	0.0986638	1.87351e+06	0.0965508	5.65245e+06	0.0876898	2.59008e+06
208-10	0.113316	2.04893e+06	0.0856084	1.60728e+06	0.1417	1.52458e+06	0.0553895	720644	0.0865262	2.25473e+06	0.125655	1.83605e+06	0.118789	1.30175e+06	0.0912294	4.42221e+06	0.0837814	1.2012e+06
208-11	0.101999	2.09256e+06	0.0800018	1.88892e+06	0.153987	1.27129e+06	0.0705024	1.42823e+06	0.0804237	2.37508e+06	0.130224	1.54064e+06	0.119032	1.14566e+06	0.100727	3.68694e+06	0.0944886	1.86696e+06
208-120	0.120618	1.06668e+06	0.0796559	1.27905e+06	-1	-1	0.0579724	850627	0.105342	4.25513e+06	0.134145	1.18611e+06	0.129391	1.04525e+06	0.0971439	3.42277e+06	0.0974524	1.39281e+06
208-121	0.0986745	2.66089e+06	0.0893449	2.33803e+06	-1	-1	0.0531786	768169	0.0815132	2.82623e+06	0.120581	1.86788e+06	0.112299	1.64955e+06	0.0922476	6.03854e+06	0.097056	2.15267e+06
208-122	0.0988857	2.38023e+06	0.0841171	2.85628e+06	0.111327	2.66466e+06	0.0688292	1.55255e+06	0.0770556	2.92449e+06	0.118032	1.84412e+06	0.107853	1.93358e+06	0.0944866	6.29335e+06	0.0952945	3.14241e+06
208-123	0.10656	1.20042e+06	0.0836563	1.27591e+06	0.127773	1.35189e+06	0.0482479	1.16878e+06	0.0859125	1.99745e+06	0.13278	1.37796e+06	0.125343	1.14898e+06	0.0989892	3.91172e+06	0.0899479	1.44084e+06
208-124	0.106865	2.35087e+06	0.0850582	2.55014e+06	0.123281	1.82012e+06	0.0631096	1.18632e+06	0.102282	5.87391e+06	0.12901	1.71679e+06	0.119348	1.53064e+06	0.0961973	4.49878e+06	0.098053	2.32455e+06
208-126	0.0954175	2.57824e+06	0.078629	2.23895e+06	-1	-1	0.0624311	1.29878e+06	0.0851719	3.99922e+06	0.122943	1.92765e+06	0.106279	1.63625e+06	0.0905203	6.58085e+06	0.0923393	2.00206e+06
208-127	0.0980712	2.68461e+06	0.0783313	1.68367e+06	0.112567	2.37179e+06	0.0469561	1.13833e+06	0.103912	7.63858e+06	0.121643	1.89642e+06	0.112464	1.61106e+06	0.0888562	6.01937e+06	0.0866721	1.67674e+06
208-128	0.109509	1.76624e+06	0.0883604	1.31681e+06	0.12669	1.48077e+06	0.0494134	503901	0.0823659	1.96316e+06	0.131145	1.2104e+06	0.125073	1.25816e+06	0.0974178	4.06687e+06	0.0963027	1.66409e+06
208-129	0.101995	1.75616e+06	0.0928963	2.27865e+06	-1	-1	0.0596185	733942	0.0906701	2.16233e+06	0.135383	1.35082e+06	0.125196	1.17939e+06	0.0972808	4.21031e+06	0.0999611	2.07533e+06
208-13	0.121599	1.12608e+06	0.0864361	1.33486e+06	0.151522	1.10984e+06	0.0617254	989065	0.0870842	1.64554e+06	0.132929	1.14005e+06	0.123661	896449	0.105562	3.14149e+06	0.0952404	1.32068e+06
208-130	0.10665	2.57862e+06	0.0862146	2.34955e+06	0.119518	1.90311e+06	0.0599485	1.2957e+06	0.0819387	2.24361e+06	0.123817	1.32425e+06	0.117299	1.62231e+06	0.0970378	4.69171e+06	0.101967	2.4711e+06
208-131	0.103934	1.7867e+06	0.0801617	1.35694e+06	0.12322	1.44937e+06	0.0519258	839132	0.0866285	1.88282e+06	0.127489	1.23948e+06	0.119257	1.05528e+06	0.0956685	4.44246e+06	0.0934649	1.61104e+06
208-132	0.11467	2.27776e+06	0.0838715	2.19421e+06	0.132502	1.35211e+06	0.0614779	1.16378e+06	0.0841195	2.18947e+06	0.13289	1.29604e+06	0.124175	1.30461e+06	0.103867	4.27136e+06	0.0980445	1.90996e+06
208-133	0.106052	1.59364e+06	0.084783	2.38408e+06	0.13413	1.48109e+06	0.0661126	1.43668e+06	0.116701	4.77764e+06	0.135439	1.31059e+06	0.119418	956523	0.104761	3.75022e+06	0.0919514	1.5014e+06
208-14	0.0945244	3.2823e+06	0.0849349	3.60384e+06	0.127807	2.72971e+06	0.0566489	1.32234e+06	0.076845	4.23875e+06	0.116037	1.84966e+06	0.102147	2.07695e+06	0.0980485	6.36781e+06	0.0869448	2.27664e+06
208-15	0.0959271	2.37703e+06	0.082339	2.27442e+06	-1	-1	0.0463331	1.17438e+06	0.0794746	3.70847e+06	0.119725	1.48555e+06	0.105078	1.63678e+06	0.0935368	6.08745e+06	0.0965397	2.32388e+06
208-16	0.103616	2.0437e+06	0.0813208	2.20737e+06	0.136178	1.66196e+06	0.0526893	744584	0.0763688	2.44155e+06	0.127144	1.26021e+06	0.116778	1.61004e+06	0.100078	4.12057e+06	0.0985318	2.05774e+06
208-17	0.111336	1.94649e+06	0.089724	1.761e+06	0.138634	1.68509e+06	0.0553062	998762	0.0838152	2.31459e+06	0.125863	1.26644e+06	0.117339	1.40418e+06	0.0980259	4.12159e+06	0.0870432	1.26869e+06
208-18	0.100861	2.91396e+06	0.0849409	2.1275e+06	0.124385	2.66305e+06	0.0519946	1.30108e+06	0.0782392	3.57227e+06	0.117931	1.54425e+06	0.106912	2.04114e+06	0.0925106	5.93073e+06	0.0849888	1.34794e+06
208-19	0.0989604	2.90382e+06	0.0759516	1.99009e+06	-1	-1	0.0546329	1.24331e+06	0.0764047	3.26879e+06	0.118526	1.59439e+06	0.104452	1.76599e+06	0.0889185	6.12105e+06	0.0888477	2.31676e+06
208-21	0.103138	1.61836e+06	0.0866081	1.29298e+06	-1	-1	0.0535117	528857	0.0980986	4.69029e+06	0.127646	1.27094e+06	0.114481	1.05822e+06	0.0923969	4.36292e+06	0.0854043	1.02106e+06
208-22	0.111965	2.2561e+06	0.0734992	1.65946e+06	0.137411	1.7189e+06	0.0467584	1.13562e+06	0.1032	5.12883e+06	0.124845	1.29937e+06	0.116517	1.56635e+06	0.0995324	3.80127e+06	0.0905319	1.97506e+06
208-24	0.101198	1.38033e+06	0.0739818	1.00373e+06	0.130879	1.81866e+06	0.0547228	887559	0.0840813	2.70287e+06	0.121099	1.46623e+06	0.111887	1.49101e+06	0.0952227	3.6545e+06	0.0983831	1.66272e+06
208-25	0.0983016	1.5164e+06	0.0770791	1.16967e+06	0.128424	1.96583e+06	0.0456041	885502	0.0995168	5.79379e+06	0.124095	1.85127e+06	0.110856	1.09207e+06	0.0926779	4.17981e+06	0.0807127	1.06864e+06
208-26	0.103873	1.77024e+06	0.0849693	2.35383e+06	-1	-1	0.0618063	691304	0.0841773	2.45542e+06	0.131724	1.21162e+06	0.122397	1.29656e+06	0.101585	4.02264e+06	0.0864352	1.39858e+06
208-27	0.112645	1.6381e+06	0.0829455	1.71233e+06	-1	-1	0.07569	1.02662e+06	0.110704	4.87391e+06	0.131751	1.42393e+06	0.123376	1.26903e+06	0.100824	3.87551e+06	0.0987211	1.6309e+06
208-28	0.094336	3.30345e+06	0.0806389	3.5319e+06	-1	-1	0.0633301	1.58662e+06	0.0946295	7.9414e+06	0.119066	1.97116e+06	0.105514	2.16475e+06	0.0950211	6.36584e+06	0.136034	1.72439e+06
208-29	0.0995977	2.84311e+06	0.0825603	2.9857e+06	-1	-1	0.0478998	1.12908e+06	0.0755568	3.05678e+06	0.120895	1.54032e+06	0.107689	1.8971e+06	0.0907572	5.47977e+06	0.133676	1.61954e+06
208-3	0.104738	2.16636e+06	0.083651	1.68095e+06	0.146036	1.31442e+06	0.0742145	1.20293e+06	0.0802256	2.36188e+06	0.127796	1.4429e+06	0.119218	1.35227e+06	0.102818	3.96603e+06	0.0987845	1.85228e+06
208-30	0.0985828	1.92702e+06	0.0882101	2.12221e+06	0.140619	1.46344e+06	0.0429632	693583	0.0836635	1.8859e+06	0.119601	993763	0.115086	1.26167e+06	0.105689	3.6319e+06	0.116064	1.02408e+06
208-32	0.107336	1.83386e+06	0.0873869	1.9554e+06	0.138045	1.39052e+06	0.0539463	1.46807e+06	0.102247	3.94935e+06	0.123085	1.11793e+06	0.116858	1.10398e+06	0.0984907	3.82602e+06	0.134049	1.18157e+06
208-33	0.100291	1.74575e+06	0.0887545	2.2943e+06	0.124259	2.38906e+06	0.0472707	1.45693e+06	0.0806875	2.61171e+06	0.11667	1.88434e+06	0.1091	1.6617e+06	0.0973103	4.57311e+06	0.117122	1.10387e+06
208-34	0.0973495	3.00076e+06	0.0825517	2.9013e+06	-1	-1	0.0605191	1.08605e+06	0.0842335	3.37806e+06	0.115269	1.9084e+06	0.108458	1.99216e+06	0.0942315	5.74304e+06	0.140373	1.98026e+06
208-35	0.0992307	1.25691e+06	0.0898028	2.05234e+06	0.14727	1.31015e+06	0.0670044	1.20357e+06	0.0877458	1.66455e+06	0.13366	976918	0.11991	997632	0.0984173	3.21255e+06	0.134233	1.10341e+06
208-36	0.112454	1.73912e+06	0.0851067	2.14434e+06	0.134858	1.57453e+06	0.0598912	1.38332e+06	0.0794456	2.10467e+06	0.123861	1.48957e+06	0.120216	1.24237e+06	0.103094	3.76793e+06	0.122606	1.45676e+06
208-37	0.106242	1.98125e+06	0.0858407	2.20409e+06	0.133004	1.7143e+06	0.0470816	1.33457e+06	0.0821561	2.22172e+06	0.117883	1.4695e+06	0.114268	1.47953e+06	0.103881	3.63398e+06	0.135199	1.57041e+06
208-38	0.0988227	2.10347e+06	0.0795922	2.1262e+06	-1	-1	0.0538881	1.04862e+06	0.081644	2.19421e+06	0.124133	1.42699e+06	0.111248	1.58257e+06	0.0942726	4.21303e+06	0.134093	1.51731e+06
208-39	0.107682	2.50324e+06	0.0962022	3.29705e+06	0.148908	1.31882e+06	0.0592282	1.05101e+06	0.0833615	2.31972e+06	0.126944	1.04738e+06	0.122347	1.22947e+06	0.103968	4.12691e+06	0.138971	1.66859e+06
208-4	0.100726	2.13665e+06	0.0844785	2.44999e+06	0.143354	1.44058e+06	0.0561109	1.08205e+06	0.104953	6.29947e+06	0.12549	1.43423e+06	0.115505	1.32295e+06	0.10053	4.42338e+06	0.0974813	2.27402e+06
208-40	0.114528	1.01804e+06	0.0874178	1.65835e+06	-1	-1	0.0653898	940748	0.0892958	1.60772e+06	0.139796	943412	0.127056	1.14486e+06	0.0952747	3.11485e+06	0.132128	856739
208-41	0.097739	1.65862e+06	0.0832356	1.8332e+06	0.13265	1.72195e+06	0.0588721	390260	0.0812064	2.36894e+06	0.118376	948032	0.114323	1.32874e+06	0.0983863	4.90916e+06	0.121681	1.06986e+06
208-42	0.103301	2.469e+06	0.0835024	2.20462e+06	0.131589	1.71783e+06	0.0704909	1.36584e+06	0.0825097	2.84829e+06	0.118235	1.62954e+06	0.113677	1.46894e+06	0.0901993	6.16482e+06	0.130063	1.84595e+06
208-43	0.114985	1.1077e+06	0.0864405	1.66177e+06	0.143145	1.18328e+06	0.0603541	622718	0.0857333	1.61761e+06	0.131244	884558	0.125052	1.01079e+06	0.103324	3.29977e+06	0.121933	961061
208-44	0.100293	1.79844e+06	0.0744306	2.41297e+06	-1	-1	0.0445898	1.10983e+06	0.0796462	2.50718e+06	0.12107	1.494e+06	0.11302	1.55383e+06	0.101348	4.10624e+06	0.134564	1.89011e+06
208-46	0.100388	1.8886e+06	0.0803512	1.71149e+06	0.132198	2.05898e+06	0.050176	1.10788e+06	0.0805066	3.04748e+06	0.117817	1.76357e+06	0.111395	1.53884e+06	0.0967473	5.3075e+06	0.1103	1.03459e+06
208-5	0.0980825	2.42379e+06	0.0779891	2.10702e+06	-1	-1	0.068874	1.65023e+06	0.0787501	2.96697e+06	0.115579	2.16432e+06	0.105445	2.04697e+06	0.0949133	5.56029e+06	0.0870207	1.73116e+06
208-51	0.113352	1.3665e+06	0.074583	1.68884e+06	-1	-1	0.0795342	688095	0.100959	4.43654e+06	0.133002	701678	0.12165	915449	0.0993843	3.51627e+06	0.137995	1.32893e+06
208-52	0.106199	2.21314e+06	0.0810188	2.48912e+06	-1	-1	0.0764346	1.55018e+06	0.0845386	2.31802e+06	0.126885	1.01636e+06	0.119448	1.29495e+06	0.0995248	3.81378e+06	0.124308	1.18114e+06
208-53	0.0933512	1.86164e+06	0.0826923	2.95318e+06	-1	-1	0.0787155	1.25182e+06	0.0910599	7.62549e+06	0.124207	1.62732e+06	0.107533	2.27188e+06	0.0898556	5.84269e+06	0.0993206	1.88781e+06
208-55	0.108586	1.57561e+06	0.0869776	1.77017e+06	0.124728	1.38454e+06	0.0425865	1.48017e+06	0.0827921	2.04202e+06	0.137729	1.21133e+06	0.125975	1.25072e+06	0.1019	3.52989e+06	0.0964711	1.26065e+06
208-56	0.114657	1.23877e+06	0.0965385	1.24307e+06	0.120523	1.5095e+06	0.0594848	1.16851e+06	0.0873143	2.19443e+06	0.13876	1.05131e+06	0.116829	808473	0.102067	3.20391e+06	0.105331	1.44581e+06
208-57	0.100026	2.14983e+06	0.087298	2.2842e+06	0.114859	2.38797e+06	0.0612774	1.62502e+06	0.0809687	2.68276e+06	0.131089	1.57184e+06	0.107925	1.47259e+06	0.0916518	5.53731e+06	0.100347	1.65975e+06
208-59	0.111985	1.77639e+06	0.0950256	1.83459e+06	-1	-1	0.0736487	1.44982e+06	0.0911337	1.9746e+06	0.144067	1.34125e+06	0.123378	1.42189e+06	0.100532	3.97296e+06	0.107148	1.75176e+06
208-6	0.101145	2.934e+06	0.0782817	2.44907e+06	0.127661	2.24076e+06	0.0511828	2.05209e+06	0.0731976	3.08897e+06	0.115461	1.98125e+06	0.104344	2.22227e+06	0.0912508	5.9065e+06	0.0846626	1.94846e+06
208-60	0.114363	1.84668e+06	0.0957438	1.7879e+06	-1	-1	0.0838935	1.05625e+06	0.0866368	2.13843e+06	0.145445	1.01041e+06	0.128005	1.19924e+06	0.101879	3.8221e+06	0.107427	1.71021e+06
208-61	0.103346	2.44305e+06	0.0847015	2.24018e+06	-1	-1	0.0564733	1.18535e+06	0.101178	4.5692e+06	0.126763	1.31357e+06	0.115265	1.29553e+06	0.0950441	4.55899e+06	0.108304	1.9068e+06
208-62	0.103136	1.66751e+06	0.0855539	2.09193e+06	0.119437	1.88535e+06	0.0472281	1.40682e+06	0.0841108	2.29983e+06	0.137825	1.30575e+06	0.119995	1.612e+06	0.0975746	4.6517e+06	0.0988766	1.47138e+06
208-63	0.109073	1.31544e+06	0.0913653	2.02805e+06	-1	-1	0.0568546	1.17442e+06	0.0847886	2.25508e+06	0.1375	1.13971e+06	0.127178	1.29097e+06	0.104589	3.53374e+06	0.0963681	1.17391e+06
208-64	0.113345	1.05617e+06	0.0836429	1.40616e+06	-1	-1	0.0475223	824467	0.0893117	2.12676e+06	0.148909	1.08333e+06	0.131329	1.07894e+06	0.0983178	3.53298e+06	0.0971982	1.16437e+06
208-65	0.0970521	2.09338e+06	0.0799592	2.05468e+06	-1	-1	0.0452023	673912	0.0798443	3.27596e+06	0.117276	1.55856e+06	0.106538	2.06778e+06	0.0961	5.36507e+06	0.0971199	2.2138e+06
208-66	0.0982618	2.40934e+06	0.0788917	2.40259e+06	0.105743	3.1636e+06	0.0590932	1.415e+06	0.0837616	3.14937e+06	0.117686	2.14379e+06	0.107543	2.26837e+06	0.0943599	6.23412e+06	0.0977465	2.15986e+06
208-67	0.111377	1.7085e+06	0.0877349	1.91385e+06	0.124647	1.26397e+06	0.0602542	694610	0.0968873	1.7192e+06	0.127273	1.04671e+06	0.122944	1.20309e+06	0.0982307	3.7053e+06	0.108009	1.69159e+06
208-68	0.101938	1.83549e+06	0.0831286	1.45171e+06	-1	-1	0.0586071	820534	0.0893987	2.38705e+06	0.12913	1.27104e+06	0.124206	1.32419e+06	0.094388	3.92032e+06	0.100941	1.39976e+06
208-69	0.0984143	3.24419e+06	0.0796934	2.69048e+06	-1	-1	0.0641186	1.31464e+06	0.0845388	3.35876e+06	0.115821	1.72942e+06	0.103934	2.06076e+06	0.0949565	5.56529e+06	0.0968882	2.27601e+06
208-7	0.118832	1.94997e+06	0.0921071	2.48187e+06	0.143043	1.41463e+06	0.0560482	935589	0.0802286	2.21509e+06	0.124109	1.23844e+06	0.120247	1.3987e+06	0.102396	3.9718e+06	0.0814885	1.29344e+06
208-70	0.100049	3.26604e+06	0.0882836	3.32189e+06	-1	-1	0.0507406	954456	0.0857042	3.42385e+06	0.117177	1.52371e+06	0.108075	1.87143e+06	0.0913129	6.89348e+06	0.110011	2.28018e+06
208-71	0.11055	2.38157e+06	0.0831304	2.28252e+06	0.12044	1.82857e+06	0.0604615	1.25662e+06	0.108919	6.03709e+06	0.128624	1.37931e+06	0.118573	1.39538e+06	0.10374	4.60488e+06	0.107758	2.27408e+06
208-72	0.105519	2.47711e+06	0.0831231	1.7937e+06	0.119075	1.83147e+06	0.0642425	1.49689e+06	0.0861786	2.54074e+06	0.128332	1.57953e+06	0.121352	1.4363e+06	0.100078	4.13568e+06	0.0950347	1.60635e+06
208-73	0.0956934	1.80639e+06	0.0755211	1.43963e+06	0.116585	1.85819e+06	0.0480551	1.85976e+06	0.103327	5.82373e+06	0.12762	1.73297e+06	0.114868	1.2892e+06	0.0944298	4.6495e+06	0.0938065	1.17198e+06
208-74	0.100192	1.72941e+06	0.082857	1.97044e+06	0.112197	1.92409e+06	0.0537064	895465	0.103047	6.47767e+06	0.123552	1.40832e+06	0.114314	1.45795e+06	0.0968899	4.59437e+06	0.104326	1.96569e+06
208-75	0.101338	2.15033e+06	0.0789253	1.77419e+06	-1	-1	0.0596276	776149	0.091086	2.00516e+06	0.13517	1.32737e+06	0.126636	1.20727e+06	0.103158	3.83795e+06	0.112121	2.10504e+06
208-77	0.106838	2.70538e+06	0.0848442	2.51904e+06	0.115535	2.38661e+06	0.0558692	1.07946e+06	0.0906481	6.40911e+06	0.116328	1.95818e+06	0.107472	1.5486e+06	0.0917821	5.95907e+06	0.0887544	2.08822e+06
208-78	0.106753	2.61866e+06	0.0884674	2.02462e+06	-1	-1	0.0577587	1.05127e+06	0.079014	2.92212e+06	0.116514	1.92348e+06	0.110061	1.81715e+06	0.0926098	5.74919e+06	0.0916382	1.96374e+06
208-8	0.109554	1.7682e+06	0.082693	2.05683e+06	-1	-1	0.0652345	829734	0.0955975	1.76692e+06	0.134092	1.38565e+06	0.123709	1.27306e+06	0.09838	4.36526e+06	0.0922605	1.38569e+06
208-80	0.106727	2.0047e+06	0.0887314	2.01238e+06	0.119702	1.78879e+06	0.0656685	1.3643e+06	0.0809158	2.39699e+06	0.127794	1.52942e+06	0.117062	1.37205e+06	0.102967	3.90148e+06	0.0888676	2.67377e+06
208-81	0.104563	2.97641e+06	0.0897607	3.14963e+06	-1	-1	0.0572532	989030	0.0783546	3.43448e+06	0.119966	1.8307e+06	0.1071	1.67102e+06	0.10369	5.28861e+06	0.0891045	3.13201e+06
208-82	0.103879	2.9889e+06	0.0872877	3.28819e+06	0.108488	2.68179e+06	0.0578919	1.78446e+06	0.080174	3.12535e+06	0.112802	1.66419e+06	0.107193	2.10881e+06	0.0934744	6.09097e+06	0.0874791	2.72303e+06
208-83	0.12722	2.38614e+06	0.0921941	2.45532e+06	-1	-1	0.0575587	1.5494e+06	0.102888	4.99504e+06	0.123853	1.42154e+06	0.116814	1.52808e+06	0.100827	4.09658e+06	0.0854001	2.28873e+06
208-84	0.107858	1.89722e+06	0.0887301	2.56996e+06	0.124689	1.72041e+06	0.0573444	891204	0.0919397	2.43165e+06	0.130936	1.52256e+06	0.115744	1.07809e+06	0.102484	4.06879e+06	0.0883338	2.01407e+06
208-85	0.100541	2.39201e+06	0.0836117	2.09492e+06	0.117599	1.84228e+06	0.0547276	996697	0.0799339	2.17306e+06	0.124459	1.614e+06	0.114941	1.59607e+06	0.095645	4.41927e+06	0.0917988	2.24496e+06
208-86	0.104305	2.00131e+06	0.0947475	2.07835e+06	-1	-1	0.0603712	1.26205e+06	0.086517	2.18501e+06	0.120959	1.52388e+06	0.118568	1.47174e+06	0.0973707	3.98453e+06	0.0912483	1.72032e+06
208-9	0.0977097	1.62706e+06	0.0732387	1.3668e+06	0.140294	1.43514e+06	0.0469208	778948	0.0830611	2.08071e+06	0.124111	1.48597e+06	0.115561	1.30401e+06	0.0966674	4.15652e+06	0.0890409	1.29372e+06
209-1	0.108318	2.71995e+06	0.0809641	2.21971e+06	0.122849	2.2336e+06	0.0608875	1.75875e+06	0.108544	7.78954e+06	0.108067	1.61544e+06	0.101544	2.16022e+06	0.101445	5.44584e+06	0.0909307	2.63107e+06
209-10	0.123156	2.13268e+06	0.0897401	1.43655e+06	0.135368	1.35248e+06	0.0498255	493312	0.0950054	5.26432e+06	0.123215	1.56391e+06	0.116115	1.99059e+06	0.0916698	4.31466e+06	0.0908411	1.20816e+06
209-11	0.11518	1.99869e+06	0.0800715	1.43575e+06	0.149687	1.29718e+06	0.0795634	1.5356e+06	0.116364	4.81298e+06	0.127754	1.57322e+06	0.124132	1.35343e+06	0.102244	3.44733e+06	0.0963425	1.84723e+06
209-120	0.133518	1.25472e+06	0.0761696	886823	-1	-1	0.0630741	810466	0.111592	4.16785e+06	0.123265	1.19447e+06	0.127788	1.60428e+06	0.105209	3.38327e+06	0.0906894	1.4956e+06
209-121	0.10766	2.92149e+06	0.091295	1.54025e+06	-1	-1	0.0490881	996385	0.0982814	6.69184e+06	0.112951	1.68753e+06	0.108332	2.30788e+06	0.0967874	5.66898e+06	0.0953557	2.15746e+06
209-122	0.112208	2.42645e+06	0.0828854	2.10882e+06	0.108487	2.06015e+06	0.0715726	1.51127e+06	0.0958028	7.41841e+06	0.110113	1.6726e+06	0.10951	2.39378e+06	0.100864	5.82071e+06	0.0962614	2.99423e+06
209-123	0.121879	1.35422e+06	0.0922812	1.03512e+06	0.123578	1.31129e+06	0.053838	975089	0.119789	4.96279e+06	0.12514	1.18356e+06	0.126582	1.66928e+06	0.108493	3.42472e+06	0.08907	1.42758e+06
209-124	0.115715	2.34965e+06	0.0896446	1.95723e+06	0.118687	1.639e+06	0.0818547	1.11266e+06	0.109118	5.52508e+06	0.120404	1.37858e+06	0.119695	1.94557e+06	0.100227	4.24696e+06	0.102224	2.54279e+06
209-126	0.101957	2.86486e+06	0.085408	2.58832e+06	-1	-1	0.0702248	1.37052e+06	0.103376	8.07575e+06	0.117917	1.89119e+06	0.108337	1.84931e+06	0.0943846	6.29525e+06	0.0956898	1.98327e+06
209-127	0.103212	3.13876e+06	0.0686051	1.32479e+06	0.109201	1.9222e+06	0.0512855	822053	0.104943	7.55249e+06	0.11677	1.8753e+06	0.1119	2.15851e+06	0.0928682	5.83686e+06	0.0864131	1.63372e+06
209-128	0.117507	1.89102e+06	0.0905773	853005	0.121492	1.38107e+06	0.0531936	911737	0.109827	4.63968e+06	0.122438	1.33332e+06	0.124991	1.57183e+06	0.100755	3.81427e+06	0.0951561	1.46843e+06
209-129	0.116882	1.92417e+06	0.0981613	1.90042e+06	-1	-1	0.0670657	744562	0.109607	5.6403e+06	0.128877	1.3287e+06	0.126909	1.61449e+06	0.0989161	3.94859e+06	0.10178	2.11442e+06
209-13	0.132206	1.20762e+06	0.0878011	1.10121e+06	0.146759	1.09565e+06	0.0657903	1.18788e+06	0.121861	4.22641e+06	0.130804	1.13937e+06	0.12684	1.08461e+06	0.117414	3.14104e+06	0.0945116	1.19837e+06
209-130	0.116172	2.46572e+06	0.0859926	1.51691e+06	0.117361	1.66974e+06	0.0759169	1.28074e+06	0.109823	5.60267e+06	0.114686	1.18803e+06	0.118714	2.00569e+06	0.101312	4.21982e+06	0.101899	2.47634e+06
209-131	0.114868	2.10347e+06	0.081335	1.07193e+06	0.118354	1.31921e+06	0.0651032	648497	0.109113	5.39237e+06	0.118644	1.10617e+06	0.118751	1.55433e+06	0.0989948	4.0396e+06	0.0934056	1.5349e+06
209-132	0.129155	1.89204e+06	0.0884349	1.47174e+06	0.124918	1.01507e+06	0.0704922	926408	0.113852	4.97081e+06	0.12387	1.13946e+06	0.128319	1.54834e+06	0.106077	3.86031e+06	0.102891	2.03503e+06
209-133	0.114824	1.76695e+06	0.0858425	2.07192e+06	0.130632	1.45448e+06	0.072274	1.80508e+06	0.125068	4.59927e+06	0.131229	1.44646e+06	0.12599	1.15453e+06	0.111808	3.65239e+06	0.0887219	1.4338e+06
209-14	0.106471	2.56302e+06	0.0887355	3.18903e+06	0.123174	2.5635e+06	0.0596132	1.31479e+06	0.10211	7.79998e+06	0.110423	1.71216e+06	0.108705	1.96685e+06	0.103716	5.82517e+06	0.0893563	2.10868e+06
209-15	0.107522	2.21417e+06	0.0848422	1.72442e+06	-1	-1	0.0488728	1.27691e+06	0.0969723	6.67058e+06	0.115217	1.54198e+06	0.110511	1.71346e+06	0.0996977	5.2664e+06	0.101546	2.32595e+06
209-16	0.119446	1.91486e+06	0.0778022	1.74581e+06	0.127966	1.61226e+06	0.0624329	890521	0.109167	5.04395e+06	0.111661	956864	0.117763	1.76639e+06	0.107073	3.8443e+06	0.100105	1.92468e+06
209-17	0.128024	1.77926e+06	0.08158	1.48165e+06	0.128918	1.60079e+06	0.0656025	1.10408e+06	0.110552	4.95626e+06	0.11284	1.03919e+06	0.120549	1.68671e+06	0.103592	3.63771e+06	0.093473	1.50082e+06
209-18	0.107541	2.63201e+06	0.0892244	1.60905e+06	0.116034	2.60622e+06	0.0523792	1.75513e+06	0.102918	7.01701e+06	0.105302	1.61766e+06	0.108852	2.44391e+06	0.0988022	5.07596e+06	0.0913693	1.79656e+06
209-19	0.103381	2.99935e+06	0.0734415	1.18649e+06	-1	-1	0.0613224	1.31284e+06	0.100449	6.6969e+06	0.114633	1.54106e+06	0.10809	2.00132e+06	0.0935892	5.8557e+06	0.0948749	2.23151e+06
209-21	0.118659	1.96811e+06	0.075456	1.06549e+06	-1	-1	0.0471002	654214	0.0985437	4.10186e+06	0.117775	1.32275e+06	0.116003	1.22309e+06	0.0959948	3.71101e+06	0.0884336	1.16749e+06
209-22	0.119918	2.00114e+06	0.0676751	1.16935e+06	0.126759	1.52895e+06	0.0532113	1.39176e+06	0.116283	4.55208e+06	0.115912	1.20525e+06	0.119927	1.76746e+06	0.10535	3.34277e+06	0.0933038	1.74063e+06
209-24	0.115247	1.33907e+06	0.0699656	1.33338e+06	0.122216	1.80161e+06	0.0632977	823448	0.100841	6.22589e+06	0.109684	1.22997e+06	0.112987	1.9458e+06	0.0965672	3.3961e+06	0.10003	2.03516e+06
209-25	0.11145	1.58887e+06	0.0723001	1.21061e+06	0.123954	2.00645e+06	0.0522463	1.24579e+06	0.10667	5.12649e+06	0.121295	1.70574e+06	0.113455	1.24341e+06	0.0969975	3.85937e+06	0.0800792	1.13676e+06
209-26	0.119217	1.76524e+06	0.0844887	2.16498e+06	-1	-1	0.0568044	903829	0.114006	5.29447e+06	0.119306	1.0945e+06	0.122143	1.69302e+06	0.106865	3.80889e+06	0.0947775	1.49169e+06
209-27	0.129569	1.55892e+06	0.0834194	1.47167e+06	-1	-1	0.0661036	884867	0.116429	4.32779e+06	0.124404	1.46029e+06	0.127524	1.50522e+06	0.108894	3.53087e+06	0.0998909	1.65082e+06
209-28	0.107399	3.4587e+06	0.0882347	3.04437e+06	-1	-1	0.0739261	1.08541e+06	0.0995023	6.74954e+06	0.116337	1.89449e+06	0.107084	2.66238e+06	0.101331	5.65304e+06	0.148256	1.73199e+06
209-29	0.104467	3.14184e+06	0.0869417	2.43239e+06	-1	-1	0.0472542	968338	0.104577	6.8608e+06	0.115965	1.39726e+06	0.108304	2.41412e+06	0.0943426	4.99436e+06	0.141156	1.63319e+06
209-3	0.119121	2.0778e+06	0.096851	1.67085e+06	0.141034	1.34317e+06	0.0712407	978385	0.112853	5.29068e+06	0.120789	1.46555e+06	0.12171	1.84482e+06	0.108258	3.51912e+06	0.103169	2.00829e+06
209-30	0.111722	1.88524e+06	0.093019	1.6718e+06	0.134424	1.39467e+06	0.0500461	726866	0.116161	4.42143e+06	0.123596	985034	0.118739	1.28967e+06	0.109155	3.20771e+06	0.128978	975446
209-32	0.118433	1.52633e+06	0.0918105	1.59196e+06	0.133791	1.33776e+06	0.0690402	907879	0.107878	3.62574e+06	0.126239	1.09548e+06	0.118846	1.26124e+06	0.101616	3.48958e+06	0.142303	1.19654e+06
209-33	0.106575	1.71587e+06	0.0859693	1.68112e+06	0.119026	2.18873e+06	0.0613769	2.01574e+06	0.111674	6.33566e+06	0.112494	1.77147e+06	0.10832	2.2717e+06	0.104122	4.17732e+06	0.126466	947569
209-34	0.103274	3.18521e+06	0.0875982	2.44364e+06	-1	-1	0.0536387	1.21069e+06	0.10669	7.32475e+06	0.110202	1.71138e+06	0.107677	2.62297e+06	0.0979687	5.2731e+06	0.147473	1.93835e+06
209-35	0.115011	1.25336e+06	0.0929099	1.86834e+06	0.140607	1.32819e+06	0.0715372	1.24801e+06	0.109192	4.05619e+06	0.125356	982020	0.121415	1.28192e+06	0.105371	2.90821e+06	0.137644	1.01399e+06
209-36	0.123803	1.80705e+06	0.0880162	1.89582e+06	0.125402	1.36321e+06	0.0612172	1.30177e+06	0.121888	4.89262e+06	0.116543	1.35524e+06	0.119815	1.6932e+06	0.114759	3.13746e+06	0.137926	1.44553e+06
209-37	0.117495	1.75303e+06	0.0886998	1.7793e+06	0.122048	1.68307e+06	0.0494769	1.44817e+06	0.115059	5.55189e+06	0.107428	1.09838e+06	0.115374	2.08415e+06	0.112004	3.06121e+06	0.143451	1.58392e+06
209-38	0.104333	2.0883e+06	0.0793223	1.66024e+06	-1	-1	0.0515201	1.11029e+06	0.106819	5.50317e+06	0.113358	1.16288e+06	0.110804	2.19292e+06	0.0976391	3.91025e+06	0.13689	1.43174e+06
209-39	0.118796	2.30973e+06	0.0987392	3.16448e+06	0.139061	1.2471e+06	0.0680249	1.12987e+06	0.115723	5.29424e+06	0.123537	935538	0.125873	1.23184e+06	0.10714	3.82362e+06	0.156553	1.70652e+06
209-4	0.112216	1.71786e+06	0.0877712	1.85409e+06	0.14301	1.39106e+06	0.0677636	1.04399e+06	0.106496	5.61965e+06	0.128112	1.40656e+06	0.120804	1.25532e+06	0.103155	4.12558e+06	0.0983603	1.95206e+06
209-40	0.124829	1.18118e+06	0.0885017	1.44841e+06	-1	-1	0.0696643	1.17309e+06	0.122758	4.183e+06	0.130164	932907	0.124753	1.72473e+06	0.101982	2.89633e+06	0.137743	934810
209-41	0.101666	1.75604e+06	0.0887146	1.76958e+06	0.122173	1.69805e+06	0.0583867	680164	0.107366	6.5151e+06	0.102909	1.03634e+06	0.111985	2.06384e+06	0.104614	4.24165e+06	0.122579	1.14918e+06
209-42	0.113651	2.32068e+06	0.0878648	1.92962e+06	0.124248	1.45317e+06	0.0696319	1.30281e+06	0.100249	6.72446e+06	0.114247	1.45416e+06	0.112741	2.04666e+06	0.0983058	5.15902e+06	0.136849	1.94315e+06
209-43	0.125448	1.27145e+06	0.0855303	1.33193e+06	0.139299	1.13316e+06	0.0596786	732503	0.108488	4.23962e+06	0.121059	761532	0.123904	1.36881e+06	0.104674	3.07612e+06	0.127396	697929
209-44	0.109228	1.60124e+06	0.0679993	1.99577e+06	-1	-1	0.062573	1.43183e+06	0.111805	5.75287e+06	0.110584	1.32638e+06	0.116427	1.93441e+06	0.102716	3.74088e+06	0.137982	1.7649e+06
209-46	0.104816	2.05631e+06	0.075327	1.41164e+06	0.123981	1.86465e+06	0.0702552	1.34307e+06	0.107315	6.52138e+06	0.116369	1.37066e+06	0.112656	2.1573e+06	0.100299	4.87493e+06	0.121316	984238
209-5	0.109043	2.33018e+06	0.0844591	1.96527e+06	-1	-1	0.0660114	1.78332e+06	0.102438	7.07979e+06	0.11428	1.76167e+06	0.109278	2.47227e+06	0.102324	5.19686e+06	0.0913279	1.8581e+06
209-51	0.131561	1.54972e+06	0.0731807	1.42045e+06	-1	-1	0.0640612	567368	0.109009	4.91534e+06	0.124561	1.17879e+06	0.126101	1.09827e+06	0.102762	3.42616e+06	0.142076	1.07792e+06
209-52	0.123402	1.99529e+06	0.0811327	2.21239e+06	-1	-1	0.0783324	1.33021e+06	0.111355	4.55143e+06	0.118224	744955	0.12842	1.32669e+06	0.104333	3.27601e+06	0.130403	1.08379e+06
209-53	0.109076	2.07805e+06	0.0873211	2.23044e+06	-1	-1	0.0731654	1.09112e+06	0.0964487	7.72799e+06	0.113035	1.59203e+06	0.110398	2.63997e+06	0.0934351	5.78249e+06	0.100375	1.62972e+06
209-55	0.125374	1.73828e+06	0.0909197	1.5553e+06	0.11785	1.31279e+06	0.0479944	2.15222e+06	0.117797	4.58781e+06	0.128296	1.01865e+06	0.125325	1.64384e+06	0.10676	3.29361e+06	0.102536	1.36986e+06
209-56	0.121493	1.22886e+06	0.09191	932281	0.118311	1.50958e+06	0.0747593	998923	0.112127	4.19676e+06	0.136403	1.04455e+06	0.120776	1.00957e+06	0.103783	3.04073e+06	0.107446	1.64263e+06
209-57	0.108967	2.25134e+06	0.0899397	1.75258e+06	0.111444	2.3046e+06	0.0668921	1.38854e+06	0.103426	5.07511e+06	0.128035	1.47835e+06	0.114844	1.59487e+06	0.0945429	5.30328e+06	0.102555	1.78489e+06
209-59	0.124676	2.05316e+06	0.0977449	1.35664e+06	-1	-1	0.07848	1.37826e+06	0.117142	4.74556e+06	0.12934	1.04923e+06	0.124176	1.81814e+06	0.108844	3.51658e+06	0.110931	1.74791e+06
209-6	0.109816	3.09347e+06	0.0880667	1.75836e+06	0.127171	1.85513e+06	0.0491301	2.20279e+06	0.0976244	6.01761e+06	0.127265	1.47628e+06	0.107388	2.54073e+06	0.104474	5.38018e+06	0.0922041	2.00674e+06
209-60	0.122769	1.90545e+06	0.0948743	1.29917e+06	-1	-1	0.0881947	949676	0.110837	4.58823e+06	0.139008	1.07227e+06	0.126815	1.57509e+06	0.0999096	3.66945e+06	0.113362	1.91233e+06
209-61	0.117227	2.2465e+06	0.0902116	1.77756e+06	-1	-1	0.0631484	1.43701e+06	0.106857	5.25603e+06	0.130721	1.20574e+06	0.120292	1.43808e+06	0.0987992	4.17098e+06	0.111641	2.02749e+06
209-62	0.112799	1.79379e+06	0.0868791	1.89545e+06	0.114301	1.73722e+06	0.0642104	1.40448e+06	0.104695	5.57459e+06	0.12635	1.15509e+06	0.120005	2.00727e+06	0.101022	4.49725e+06	0.103464	1.54795e+06
209-63	0.120244	1.52498e+06	0.0988574	1.92583e+06	-1	-1	0.0757568	1.11151e+06	0.112924	4.78391e+06	0.134224	1.1329e+06	0.130492	1.60517e+06	0.106111	3.51904e+06	0.103704	1.32234e+06
209-64	0.122876	1.03941e+06	0.0863219	1.09395e+06	-1	-1	0.054982	1.25399e+06	0.113141	4.32437e+06	0.138057	955706	0.131893	1.4995e+06	0.0997203	3.1079e+06	0.101169	1.23007e+06
209-65	0.104586	2.306e+06	0.0835809	1.89893e+06	-1	-1	0.0554632	705979	0.107618	7.30222e+06	0.111042	1.29809e+06	0.106839	2.38336e+06	0.0995719	5.47287e+06	0.10173	2.29837e+06
209-66	0.107338	2.37079e+06	0.0798242	1.79115e+06	0.101881	2.48441e+06	0.0626512	1.32645e+06	0.102786	7.20332e+06	0.109545	1.73109e+06	0.110471	2.75172e+06	0.100338	5.2809e+06	0.100847	2.0958e+06
209-67	0.131142	1.64844e+06	0.0909363	1.6345e+06	0.117136	1.09728e+06	0.0617818	1.0838e+06	0.109498	4.79389e+06	0.118009	1.10326e+06	0.125506	1.64119e+06	0.0997225	3.47163e+06	0.107535	1.65457e+06
209-68	0.114823	1.97089e+06	0.0836971	804272	-1	-1	0.0633828	737120	0.109133	5.12125e+06	0.122121	1.22326e+06	0.124624	1.66047e+06	0.0972471	3.59263e+06	0.102268	1.4098e+06
209-69	0.107477	2.92533e+06	0.0799252	2.42766e+06	-1	-1	0.0682201	1.29365e+06	0.10881	7.1234e+06	0.111723	1.96007e+06	0.105219	2.34867e+06	0.0987091	5.2095e+06	0.100893	2.24147e+06
209-7	0.12936	1.7103e+06	0.0972478	2.3317e+06	0.139025	1.28536e+06	0.0622127	1.10005e+06	0.114966	4.71902e+06	0.114754	995630	0.122973	1.64948e+06	0.111918	3.70983e+06	0.0887195	1.30534e+06
209-70	0.109094	3.27542e+06	0.0932898	2.79994e+06	-1	-1	0.0459981	1.30146e+06	0.0968338	5.69288e+06	0.112049	1.51838e+06	0.107954	2.18731e+06	0.100838	6.13542e+06	0.110541	2.17862e+06
209-71	0.121463	2.30467e+06	0.0863068	1.83084e+06	0.11482	1.78338e+06	0.0676101	1.13696e+06	0.117296	5.25512e+06	0.122351	1.24036e+06	0.120944	1.48266e+06	0.111132	4.18923e+06	0.112253	2.3825e+06
209-72	0.118436	2.41429e+06	0.0845055	1.38814e+06	0.113084	1.5516e+06	0.0719527	1.40351e+06	0.111849	5.04582e+06	0.12061	1.41265e+06	0.125169	1.79811e+06	0.105971	4.00729e+06	0.096819	1.69816e+06
209-73	0.111253	1.68076e+06	0.0760373	976519	0.111658	1.88335e+06	0.0608653	972859	0.106528	5.38728e+06	0.122156	1.68899e+06	0.11742	1.46411e+06	0.101646	4.20273e+06	0.0955647	1.10788e+06
209-74	0.109684	1.77765e+06	0.0829321	1.26898e+06	0.108184	1.7569e+06	0.0512709	907649	0.106815	5.72823e+06	0.115217	1.3876e+06	0.115972	2.0203e+06	0.100665	4.2582e+06	0.104616	2.02708e+06
209-75	0.117138	2.10998e+06	0.084244	1.25276e+06	-1	-1	0.0620768	1.28908e+06	0.123107	4.47913e+06	0.125317	1.12428e+06	0.128439	1.68407e+06	0.110579	3.48092e+06	0.115039	2.00563e+06
209-77	0.120521	2.41599e+06	0.0863865	1.75009e+06	0.112152	2.22502e+06	0.0602293	651390	0.0962023	5.20171e+06	0.109573	2.09942e+06	0.107925	1.91542e+06	0.0984413	5.00804e+06	0.0928245	2.05797e+06
209-78	0.112466	1.96854e+06	0.089946	1.44736e+06	-1	-1	0.0586948	903694	0.0967835	4.71189e+06	0.111514	1.52729e+06	0.111086	2.09012e+06	0.101308	5.14522e+06	0.0951656	1.99783e+06
209-8	0.12674	1.94403e+06	0.0843836	1.80202e+06	-1	-1	0.0718812	796517	0.112562	4.9268e+06	0.134926	1.76413e+06	0.123448	1.57142e+06	0.10089	4.39646e+06	0.095633	1.44511e+06
209-80	0.119999	1.65983e+06	0.0911736	1.55998e+06	0.115913	1.52905e+06	0.0734051	1.34537e+06	0.116441	4.52137e+06	0.122343	1.43859e+06	0.12205	1.70567e+06	0.107984	3.5106e+06	0.0942369	2.34052e+06
209-81	0.111392	2.74219e+06	0.0946618	3.03191e+06	-1	-1	0.0605898	891891	0.102275	7.0336e+06	0.114356	2.04015e+06	0.108999	1.87138e+06	0.111236	4.80752e+06	0.0909945	3.26246e+06
209-82	0.108694	3.07892e+06	0.092625	3.29895e+06	0.103433	2.15758e+06	0.0614345	1.17479e+06	0.10193	7.06896e+06	0.109117	1.30699e+06	0.108316	2.3854e+06	0.10032	5.5661e+06	0.0931052	2.37675e+06
209-83	0.122675	2.21049e+06	0.0944035	1.75301e+06	-1	-1	0.0625487	1.28003e+06	0.104561	4.06785e+06	0.116696	1.22354e+06	0.123263	1.73702e+06	0.104121	3.83452e+06	0.0880468	1.84904e+06
209-84	0.117439	1.85666e+06	0.0908593	1.90423e+06	0.121911	1.76498e+06	0.0751118	866422	0.114212	5.09312e+06	0.125268	1.52994e+06	0.121674	1.25954e+06	0.109071	3.61947e+06	0.0908796	2.18373e+06
209-85	0.110441	2.23172e+06	0.0839247	1.43126e+06	0.112432	1.74255e+06	0.0638019	1.10592e+06	0.106281	5.0878e+06	0.11665	1.5285e+06	0.114599	2.11253e+06	0.10054	3.9258e+06	0.0918154	2.11958e+06
209-86	0.113862	1.96959e+06	0.109035	1.47636e+06	-1	-1	0.0651319	832596	0.107885	4.53644e+06	0.11458	1.31638e+06	0.117198	1.83134e+06	0.10302	3.86229e+06	0.0930464	1.77646e+06
209-9	0.111294	1.57641e+06	0.0720747	1.10702e+06	0.138511	1.35362e+06	0.0537553	1.07142e+06	0.106435	5.28264e+06	0.123948	1.67258e+06	0.118751	1.42583e+06	0.103383	3.98162e+06	0.0910161	1.29628e+06
210-1	0.101303	2.12088e+06	0.0737088	1.33412e+06	0.12123	2.47037e+06	0.0578436	1.28921e+06	0.103001	7.22067e+06	0.118974	1.42522e+06	0.100933	2.01669e+06	0.0943543	5.33555e+06	0.0868784	1.95423e+06
210-10	0.110696	1.44258e+06	0.0801186	1.11001e+06	0.134892	1.35007e+06	0.0455634	608192	0.0912949	5.25525e+06	0.133417	1.02955e+06	0.117352	1.85321e+06	0.0911971	3.88033e+06	0.0796148	1.06434e+06
210-11	0.100615	1.62089e+06	0.075545	1.03123e+06	0.14927	1.14701e+06	0.064027	1.35806e+06	0.10614	4.20044e+06	0.131964	1.25878e+06	0.124795	1.22052e+06	0.0984004	3.31396e+06	0.0927197	1.31616e+06
210-120	0.120219	1.08793e+06	0.0626103	597347	-1	-1	0.0660201	915568	0.0971043	4.10114e+06	0.120805	855741	0.130606	1.5042e+06	0.0967637	3.46e+06	0.0851102	1.45203e+06
210-121	0.0957493	2.23029e+06	0.0764071	1.3784e+06	-1	-1	0.0564318	1.14383e+06	0.0928379	4.9877e+06	0.111189	1.57803e+06	0.112854	2.01112e+06	0.0923988	5.46446e+06	0.0877589	1.55824e+06
210-122	0.0954042	1.91491e+06	0.0697972	1.43335e+06	0.106552	2.48504e+06	0.067039	1.18064e+06	0.0901382	7.13264e+06	0.108381	1.68608e+06	0.108411	2.37814e+06	0.095916	6.0603e+06	0.0911464	2.80186e+06
210-123	0.105393	848210	0.0674434	705978	0.12292	1.41063e+06	0.0466039	1.15367e+06	0.105378	4.58074e+06	0.126561	1.2523e+06	0.127259	1.41831e+06	0.0983743	3.48369e+06	0.0797622	1.01591e+06
210-124	0.106653	1.95236e+06	0.0734755	1.31548e+06	0.117362	1.68614e+06	0.0590565	855101	0.100775	5.4979e+06	0.118165	1.47075e+06	0.119386	1.92091e+06	0.0964319	4.26402e+06	0.0964276	2.06511e+06
210-126	0.094	2.09675e+06	0.069016	1.37946e+06	-1	-1	0.0590121	1.16922e+06	0.101581	8.13952e+06	0.117007	1.85792e+06	0.108227	1.78185e+06	0.0926618	5.81578e+06	0.0869457	1.56331e+06
210-127	0.0923921	2.11327e+06	0.0650321	1.11689e+06	0.109431	1.91224e+06	0.0530749	1.34045e+06	0.0997765	7.3049e+06	0.115049	1.83501e+06	0.111766	1.88894e+06	0.0878494	4.96037e+06	0.0800875	1.60734e+06
210-128	0.108374	1.45839e+06	0.0716977	776649	0.122602	1.48612e+06	0.0463117	842812	0.0963944	3.83866e+06	0.120858	1.12477e+06	0.126828	1.54151e+06	0.096116	3.60468e+06	0.0899527	1.19151e+06
210-129	0.101595	1.73176e+06	0.0802877	1.22e+06	-1	-1	0.0582155	730294	0.104437	6.06137e+06	0.127081	1.33707e+06	0.124876	1.51381e+06	0.0957023	3.77918e+06	0.094943	1.68724e+06
210-13	0.118711	856524	0.0683639	725915	0.146429	1.04746e+06	0.0516485	1.523e+06	0.110387	3.99107e+06	0.139631	1.08654e+06	0.124628	1.06696e+06	0.103848	3.02719e+06	0.0794794	982044
210-130	0.106134	1.90481e+06	0.0783311	1.38537e+06	0.114919	1.81666e+06	0.0567022	976512	0.0958946	4.05678e+06	0.111511	1.13879e+06	0.118186	1.9612e+06	0.0960433	4.09377e+06	0.0976636	2.08542e+06
210-131	0.102882	1.49585e+06	0.068789	768091	0.118197	1.26099e+06	0.0623074	761869	0.097655	5.27402e+06	0.117306	999751	0.117687	1.54384e+06	0.0907487	4.0809e+06	0.0767027	936473
210-132	0.114084	1.71228e+06	0.0705603	957658	0.12688	1.12e+06	0.0582183	730574	0.102312	4.71905e+06	0.123709	1.1822e+06	0.129374	1.5133e+06	0.100569	3.91186e+06	0.0911185	1.5316e+06
210-133	0.100982	1.64631e+06	0.0749185	1.46596e+06	0.13166	1.43251e+06	0.0634629	1.02321e+06	0.110808	4.81421e+06	0.130768	1.27647e+06	0.125621	1.10996e+06	0.102164	3.51937e+06	0.0881349	1.05297e+06
210-14	0.0953619	2.61814e+06	0.0801398	1.74738e+06	0.119667	2.76304e+06	0.0492051	1.26731e+06	0.0955799	7.75033e+06	0.108924	1.57682e+06	0.107278	2.07007e+06	0.0958986	6.23536e+06	0.0832773	1.98008e+06
210-15	0.0971311	2.19976e+06	0.0667858	1.74205e+06	-1	-1	0.0456163	1.19094e+06	0.0943966	7.20003e+06	0.113655	1.46879e+06	0.109169	1.69334e+06	0.0945198	5.56967e+06	0.0922415	1.73558e+06
210-16	0.107805	1.71599e+06	0.0709215	1.26373e+06	0.127924	1.67602e+06	0.0398071	812721	0.100054	4.42824e+06	0.117119	1.19581e+06	0.116675	1.83616e+06	0.103881	3.70369e+06	0.0935298	1.52683e+06
210-17	0.111088	1.52801e+06	0.0815309	961236	0.131233	1.52448e+06	0.0514008	813325	0.105927	4.86444e+06	0.114334	1.10201e+06	0.124904	1.58734e+06	0.0976694	3.57513e+06	0.0812796	1.00828e+06
210-18	0.0963203	2.02363e+06	0.0831762	1.29433e+06	0.117398	2.36243e+06	0.0475891	1.01603e+06	0.0980863	6.45321e+06	0.105382	1.3052e+06	0.10913	2.28856e+06	0.0911549	5.0026e+06	0.0792837	1.24368e+06
210-19	0.0974723	2.54726e+06	0.0607562	1.34407e+06	-1	-1	0.0511209	947914	0.0898864	6.45779e+06	0.10956	1.71048e+06	0.107821	2.00327e+06	0.0875226	5.70616e+06	0.086015	1.85025e+06
210-21	0.106031	1.66561e+06	0.0657518	1.01396e+06	-1	-1	0.0389665	509396	0.0912727	3.94378e+06	0.120117	1.20221e+06	0.11662	1.15228e+06	0.0922956	3.70335e+06	0.0775997	824830
210-22	0.10783	1.86626e+06	0.0656522	720440	0.12773	1.498e+06	0.0458416	1.16084e+06	0.0997965	4.44335e+06	0.112839	1.20153e+06	0.132637	1.52589e+06	0.0974131	3.32342e+06	0.0841694	1.50354e+06
210-24	0.0962215	1.07527e+06	0.0589292	1.05573e+06	0.120747	1.85902e+06	0.0514058	899674	0.0918925	5.34274e+06	0.106179	1.26183e+06	0.11595	1.69242e+06	0.0927411	3.44338e+06	0.0871493	1.29127e+06
210-25	0.0969153	1.28033e+06	0.0605816	950416	0.124724	1.7813e+06	0.0409639	1.43374e+06	0.101495	4.80558e+06	0.118375	1.78355e+06	0.115466	1.06415e+06	0.0929049	3.78811e+06	0.0723984	735610
210-26	0.10504	1.71976e+06	0.0721669	1.43206e+06	-1	-1	0.0552497	735149	0.10507	5.1505e+06	0.118659	924987	0.124371	1.64218e+06	0.102538	3.75985e+06	0.086889	1.21424e+06
210-27	0.114593	1.5244e+06	0.0689025	1.00396e+06	-1	-1	0.0623776	799409	0.107577	4.21304e+06	0.123053	1.09074e+06	0.133001	1.52108e+06	0.104049	3.49067e+06	0.096444	1.52767e+06
210-28	0.0945104	3.31572e+06	0.0787906	2.35529e+06	-1	-1	0.0615291	1.15802e+06	0.0890566	7.19509e+06	0.111848	1.85903e+06	0.106387	2.4953e+06	0.0928688	5.8286e+06	0.136702	1.59874e+06
210-29	0.0972568	2.60007e+06	0.0849289	2.21988e+06	-1	-1	0.04885	1.52174e+06	0.0868005	6.05078e+06	0.112695	1.28564e+06	0.107863	2.26394e+06	0.0924678	5.03127e+06	0.12584	1.32055e+06
210-3	0.104669	1.86577e+06	0.076954	881426	0.141212	1.33417e+06	0.0617471	865164	0.0990974	4.37514e+06	0.130082	1.37861e+06	0.122281	1.62982e+06	0.10145	3.46993e+06	0.0937789	1.64131e+06
210-30	0.102439	1.44575e+06	0.0762189	1.13083e+06	0.134013	1.43844e+06	0.0515959	991028	0.104378	4.07072e+06	0.117624	1.05853e+06	0.118854	1.33522e+06	0.104728	3.24683e+06	0.121274	771696
210-32	0.111496	1.6919e+06	0.0880358	1.47797e+06	0.132943	1.29846e+06	0.0571597	1.2581e+06	0.0934809	3.43067e+06	0.118438	1.12312e+06	0.117047	1.25858e+06	0.0948675	3.49769e+06	0.140102	1.28831e+06
210-33	0.0972207	1.26137e+06	0.0829369	1.47309e+06	0.118607	2.16981e+06	0.0514228	2.69909e+06	0.10244	5.72449e+06	0.11227	1.45182e+06	0.110226	2.01458e+06	0.0974671	3.99497e+06	0.116252	868051
210-34	0.0935977	2.09946e+06	0.0799291	1.92511e+06	-1	-1	0.0598754	1.331e+06	0.101026	7.33367e+06	0.10793	1.37028e+06	0.108417	2.40725e+06	0.0900051	5.25195e+06	0.13101	1.3644e+06
210-35	0.0963367	1.26108e+06	0.0809265	1.36735e+06	0.136529	1.35258e+06	0.0782285	1.20489e+06	0.0948069	3.8092e+06	0.123151	1.01346e+06	0.122495	1.1211e+06	0.0978699	2.90338e+06	0.130787	996329
210-36	0.10906	1.45229e+06	0.076845	1.23067e+06	0.127926	1.22817e+06	0.0547002	1.0092e+06	0.102945	4.11395e+06	0.115436	1.20407e+06	0.122065	1.62182e+06	0.103018	3.09084e+06	0.123942	1.06464e+06
210-37	0.105877	1.4478e+06	0.0785943	1.23985e+06	0.123245	1.65295e+06	0.0570919	1.64705e+06	0.107619	4.97472e+06	0.107064	1.10411e+06	0.116916	1.88099e+06	0.102095	3.06865e+06	0.126871	1.21955e+06
210-38	0.0952075	1.74843e+06	0.0724529	1.24316e+06	-1	-1	0.0543879	1.46164e+06	0.0989012	5.80299e+06	0.110806	1.2329e+06	0.112591	2.00732e+06	0.094037	3.88897e+06	0.129448	1.20313e+06
210-39	0.107929	2.12249e+06	0.0908729	2.60747e+06	0.138363	1.30883e+06	0.0555874	858674	0.109837	4.75159e+06	0.119453	868368	0.128806	1.21376e+06	0.102569	3.84369e+06	0.145417	1.58821e+06
210-4	0.0992245	1.64002e+06	0.0723282	1.49056e+06	0.144084	1.24485e+06	0.0472024	926193	0.100744	5.62911e+06	0.138132	1.1398e+06	0.119929	1.28296e+06	0.0987788	4.10559e+06	0.0883395	1.60293e+06
210-40	0.108315	888113	0.0829947	1.25963e+06	-1	-1	0.0671463	1.08598e+06	0.103749	4.03471e+06	0.126171	952903	0.125982	1.63978e+06	0.0941444	3.00373e+06	0.126287	741251
210-41	0.0910926	1.25026e+06	0.0766904	1.27231e+06	0.122788	1.68552e+06	0.0592366	394123	0.0988334	4.51151e+06	0.0986648	741468	0.114156	1.81567e+06	0.100021	4.16147e+06	0.11501	763732
210-42	0.104733	1.9935e+06	0.0717053	1.21215e+06	0.122014	1.51653e+06	0.0652589	965798	0.0893074	7.29591e+06	0.111897	1.25712e+06	0.11319	1.74678e+06	0.0888358	5.26654e+06	0.1204	1.29288e+06
210-43	0.111229	768970	0.0651283	1.00513e+06	0.14071	1.10654e+06	0.0577034	539257	0.0963218	2.91276e+06	0.121994	707862	0.125223	1.27004e+06	0.101079	2.85034e+06	0.118799	567651
210-44	0.10125	1.37104e+06	0.0608143	1.57876e+06	-1	-1	0.0420148	927454	0.105035	5.75015e+06	0.109454	1.45346e+06	0.117215	1.89958e+06	0.100275	3.62511e+06	0.125491	1.66686e+06
210-46	0.0922212	1.06226e+06	0.0678652	1.14262e+06	0.126302	1.80242e+06	0.0654821	1.3763e+06	0.101972	6.38939e+06	0.113307	1.38136e+06	0.114001	1.96807e+06	0.0950004	4.47292e+06	0.108893	665568
210-5	0.0978301	1.80466e+06	0.0765339	1.40366e+06	-1	-1	0.0597419	2.01856e+06	0.0971917	6.35645e+06	0.120079	1.53866e+06	0.109234	2.36063e+06	0.0996428	5.02707e+06	0.0860386	1.6396e+06
210-51	0.118133	1.13672e+06	0.0615817	1.02627e+06	-1	-1	0.0731948	705287	0.0943932	4.10594e+06	0.121552	1.12958e+06	0.124212	980841	0.0967397	3.31157e+06	0.130671	825495
210-52	0.112869	2.0685e+06	0.0676252	1.70619e+06	-1	-1	0.0680412	1.20214e+06	0.102552	4.75009e+06	0.115497	748720	0.126702	1.46843e+06	0.101187	3.51589e+06	0.115909	941877
210-53	0.095237	1.37767e+06	0.0803453	1.66206e+06	-1	-1	0.0752886	1.11121e+06	0.0920989	7.07962e+06	0.115246	1.24438e+06	0.110913	2.47593e+06	0.0907902	5.4589e+06	0.0910753	1.5114e+06
210-55	0.104232	1.26392e+06	0.0736272	1.05215e+06	0.116933	1.03222e+06	0.04701	1.28228e+06	0.101213	3.46992e+06	0.133767	852233	0.127431	1.27201e+06	0.10211	3.24069e+06	0.0910502	1.09693e+06
210-56	0.109862	857080	0.0721194	682564	0.116006	1.48307e+06	0.0582361	1.25289e+06	0.107463	3.85755e+06	0.128252	786381	0.120439	897726	0.101376	2.77518e+06	0.0972929	1.32535e+06
210-57	0.0981051	1.69749e+06	0.074795	963828	0.111372	2.1881e+06	0.0584145	1.46523e+06	0.0934878	5.32047e+06	0.126336	1.30863e+06	0.113991	1.3801e+06	0.090129	4.58276e+06	0.0949384	1.38967e+06
210-59	0.111705	1.55769e+06	0.0868227	1.15666e+06	-1	-1	0.0696475	1.50916e+06	0.0984525	4.59247e+06	0.127621	1.09276e+06	0.123603	1.74651e+06	0.0998439	3.45828e+06	0.0974846	1.55489e+06
210-6	0.103199	2.72724e+06	0.0723001	1.28046e+06	0.12538	1.9777e+06	0.0467745	1.82051e+06	0.0871702	6.60471e+06	0.122983	1.7071e+06	0.107847	2.56731e+06	0.101315	5.30319e+06	0.0837892	1.75052e+06
210-60	0.108953	1.67298e+06	0.079547	840601	-1	-1	0.0822951	888780	0.101674	3.99272e+06	0.137513	883545	0.126527	1.49825e+06	0.0975485	3.5854e+06	0.101806	1.78162e+06
210-61	0.102838	1.78661e+06	0.0765534	1.23972e+06	-1	-1	0.0524068	1.17383e+06	0.0945532	4.23151e+06	0.130931	1.16299e+06	0.118112	1.2192e+06	0.0941527	4.10362e+06	0.0996097	1.42102e+06
210-62	0.100894	1.31735e+06	0.075524	1.34119e+06	0.114427	1.63907e+06	0.0502004	1.93491e+06	0.0927124	5.10915e+06	0.125542	1.03061e+06	0.120296	1.85062e+06	0.0948419	4.48458e+06	0.095152	1.31673e+06
210-63	0.106936	1.18568e+06	0.0796814	1.11282e+06	-1	-1	0.0553653	1.09012e+06	0.103143	5.04742e+06	0.132743	1.14455e+06	0.130542	1.58106e+06	0.0991193	3.61227e+06	0.0899827	1.08286e+06
210-64	0.110141	873794	0.0689372	818658	-1	-1	0.0443289	666353	0.104193	4.33357e+06	0.133383	977118	0.131904	1.35798e+06	0.0949402	3.10796e+06	0.089206	1.06751e+06
210-65	0.0946442	1.79779e+06	0.0716819	1.09718e+06	-1	-1	0.0479241	862078	0.103501	6.62659e+06	0.109917	1.30687e+06	0.105691	2.40646e+06	0.0941386	5.17511e+06	0.0933018	1.76154e+06
210-66	0.0928831	1.7791e+06	0.0687123	1.06213e+06	0.101476	2.70129e+06	0.0551177	939745	0.0932589	6.87369e+06	0.109001	1.62419e+06	0.109895	2.70572e+06	0.0908494	5.70031e+06	0.093401	1.69561e+06
210-67	0.110886	1.26382e+06	0.0849084	1.16856e+06	0.113926	1.07463e+06	0.0647026	713485	0.10242	4.16829e+06	0.113531	971081	0.12452	1.58272e+06	0.0975535	3.24672e+06	0.0962209	1.22901e+06
210-68	0.101203	1.64515e+06	0.0714229	665962	-1	-1	0.0496512	672265	0.0999888	4.78737e+06	0.120597	1.06998e+06	0.126325	1.59565e+06	0.092449	3.33611e+06	0.0923255	1.01752e+06
210-69	0.0968274	2.60431e+06	0.0730795	1.6874e+06	-1	-1	0.0584517	1.04606e+06	0.101953	7.1181e+06	0.108623	1.82106e+06	0.104535	2.19781e+06	0.0907712	5.03239e+06	0.0942621	1.88712e+06
210-7	0.119488	1.5039e+06	0.085529	1.56607e+06	0.140451	1.27399e+06	0.0452746	867303	0.104523	4.55161e+06	0.12312	878650	0.120537	1.66391e+06	0.102439	3.69417e+06	0.0767708	899078
210-70	0.0999801	2.75243e+06	0.0837336	1.93274e+06	-1	-1	0.0479772	954701	0.0916153	6.07035e+06	0.1067	1.28048e+06	0.106068	2.11737e+06	0.0977061	5.51206e+06	0.104537	1.90702e+06
210-71	0.112172	1.92112e+06	0.0776582	1.72044e+06	0.113549	1.80822e+06	0.0540332	797884	0.10619	5.32487e+06	0.119985	1.33306e+06	0.121879	1.47113e+06	0.103768	4.19936e+06	0.103715	2.10631e+06
210-72	0.110845	2.00919e+06	0.0687535	885704	0.114403	1.58479e+06	0.0596615	930787	0.103499	5.28662e+06	0.117498	1.3317e+06	0.125921	1.73502e+06	0.097434	3.80005e+06	0.089663	1.45483e+06
210-73	0.0984299	1.28976e+06	0.0712485	794329	0.112866	1.79321e+06	0.0493577	700802	0.0934674	5.14054e+06	0.122807	1.48556e+06	0.118148	1.32748e+06	0.0955084	4.08772e+06	0.0901788	1.01523e+06
210-74	0.100061	1.26304e+06	0.074358	735699	0.108545	1.49905e+06	0.0553842	1.00065e+06	0.0971943	6.21797e+06	0.11574	1.14025e+06	0.116842	1.76413e+06	0.0928182	4.04186e+06	0.0905758	1.49303e+06
210-75	0.101658	1.98893e+06	0.0696373	1.04627e+06	-1	-1	0.0527654	809105	0.103952	4.81762e+06	0.124384	994822	0.129507	1.649e+06	0.0995133	3.73386e+06	0.105903	1.86905e+06
210-77	0.106578	1.9906e+06	0.0771771	1.06989e+06	0.111025	2.12703e+06	0.0506367	843493	0.0908348	5.75792e+06	0.109424	1.59933e+06	0.109235	1.59992e+06	0.0885965	5.3166e+06	0.0841778	1.64012e+06
210-78	0.10031	1.46906e+06	0.0756789	790010	-1	-1	0.0545201	970054	0.0924859	5.10954e+06	0.107915	1.73113e+06	0.109802	2.07005e+06	0.0903899	4.8927e+06	0.0830045	1.62339e+06
210-8	0.107432	1.50652e+06	0.0715345	1.12973e+06	-1	-1	0.0595192	594694	0.0917405	5.27697e+06	0.139279	1.51947e+06	0.12164	1.53299e+06	0.0919655	4.2918e+06	0.0810344	948824
210-80	0.103425	1.48555e+06	0.0769162	1.15296e+06	0.115133	1.61715e+06	0.0600042	987050	0.105398	4.53497e+06	0.122408	1.45276e+06	0.121711	1.69011e+06	0.0991691	3.5564e+06	0.0862058	2.07825e+06
210-81	0.100399	2.31475e+06	0.0844763	1.90104e+06	-1	-1	0.0534441	804908	0.100767	6.09797e+06	0.114244	1.76547e+06	0.108275	1.88294e+06	0.105836	4.82575e+06	0.0883135	2.66e+06
210-82	0.102786	2.01129e+06	0.078546	1.87423e+06	0.103312	2.11507e+06	0.0559196	847399	0.0954561	6.46064e+06	0.105674	1.31688e+06	0.10714	2.37586e+06	0.0928671	5.59066e+06	0.0850024	1.94058e+06
210-83	0.108533	2.11114e+06	0.0916287	1.70435e+06	-1	-1	0.0682396	1.30309e+06	0.0989913	3.76497e+06	0.116194	1.03262e+06	0.124509	1.68539e+06	0.10161	3.64896e+06	0.0822285	1.6449e+06
210-84	0.101718	1.43761e+06	0.0794999	1.29439e+06	0.119621	1.6174e+06	0.0533203	732533	0.101744	5.20884e+06	0.123591	1.48173e+06	0.118648	1.21648e+06	0.0992148	3.67776e+06	0.0811051	1.90415e+06
210-85	0.10183	2.00488e+06	0.072269	1.03339e+06	0.110096	1.81044e+06	0.0515968	775730	0.093293	3.93273e+06	0.115983	1.41986e+06	0.114632	1.97664e+06	0.0969504	3.97316e+06	0.0854872	1.78568e+06
210-86	0.104982	1.65565e+06	0.0920224	1.39205e+06	-1	-1	0.0564345	780480	0.101343	4.63631e+06	0.112124	1.17874e+06	0.117282	1.83481e+06	0.0976582	3.77631e+06	0.0847968	1.65745e+06
210-9	0.0967399	1.29731e+06	0.0628955	940587	0.136611	1.41153e+06	0.0389819	823393	0.0965632	4.92923e+06	0.136314	1.20434e+06	0.118337	1.3339e+06	0.0944027	4.06357e+06	0.0804138	916533
211-1	0.0970373	2.24985e+06	0.0806738	2.2236e+06	0.126141	2.43589e+06	0.0595367	1.60439e+06	0.0768207	3.32014e+06	0.118291	1.57309e+06	0.106565	1.8548e+06	0.0957692	5.44592e+06	0.0854837	2.37816e+06
211-10	0.101502	1.27671e+06	0.081049	1.67783e+06	0.142655	1.54268e+06	0.0494679	690289	0.0752206	4.20076e+06	0.12779	1.48925e+06	0.121318	1.92954e+06	0.084677	4.18006e+06	0.0843252	1.2612e+06
211-11	0.102264	1.84869e+06	0.0766361	1.91296e+06	0.149464	1.58827e+06	0.0664366	1.8255e+06	0.0810163	2.45261e+06	0.131698	1.70544e+06	0.117988	1.4565e+06	0.0980655	3.80704e+06	0.0915878	2.12669e+06
211-120	0.111464	928734	0.0746095	1.09375e+06	-1	-1	0.0724865	1.07597e+06	0.11041	5.33987e+06	0.120498	1.30826e+06	0.124986	1.62213e+06	0.0950458	3.67936e+06	0.0880782	1.65629e+06
211-121	0.087966	1.90433e+06	0.0814015	1.8748e+06	-1	-1	0.0502762	809050	0.0849779	3.02778e+06	0.111447	1.85783e+06	0.110332	2.33466e+06	0.0904884	5.81175e+06	0.090239	1.99789e+06
211-122	0.0834097	1.35042e+06	0.0773869	2.34473e+06	0.105649	2.64016e+06	0.0671289	1.26122e+06	0.0828903	3.30699e+06	0.106426	1.88525e+06	0.104689	2.61438e+06	0.0915067	6.5187e+06	0.0891525	2.53604e+06
211-123	0.100578	893075	0.0745436	1.32867e+06	0.123133	1.56948e+06	0.0440179	903868	0.0907306	2.24078e+06	0.126251	1.55555e+06	0.127301	1.6901e+06	0.101102	3.42038e+06	0.0847731	1.26357e+06
211-124	0.101631	1.65512e+06	0.0780253	2.46939e+06	0.119541	1.73747e+06	0.0625356	1.17629e+06	0.110173	6.4403e+06	0.118498	1.56338e+06	0.117796	2.05534e+06	0.0941344	4.26135e+06	0.0931959	2.30957e+06
211-126	0.0882472	1.95097e+06	0.0766872	1.62526e+06	-1	-1	0.0611855	1.1849e+06	0.0942496	4.43195e+06	0.114766	2.01231e+06	0.104832	1.87944e+06	0.0858972	6.25424e+06	0.0861721	1.98258e+06
211-127	0.0841626	1.80723e+06	0.0741577	1.51815e+06	0.10282	2.77228e+06	0.0627432	1.64256e+06	0.109694	8.97655e+06	0.105963	2.45306e+06	0.100214	2.89994e+06	0.084081	5.56674e+06	0.0810522	1.87673e+06
211-128	0.104832	1.53871e+06	0.0792011	1.30487e+06	0.122811	1.4843e+06	0.0557091	1.00639e+06	0.0844371	2.09142e+06	0.122703	1.3628e+06	0.1265	1.70261e+06	0.0951092	3.58138e+06	0.0899895	1.38377e+06
211-129	0.0929213	1.38021e+06	0.0831702	1.77045e+06	-1	-1	0.0575606	855960	0.0930103	2.56278e+06	0.123267	1.74332e+06	0.119049	1.78684e+06	0.0925976	3.87869e+06	0.0975942	2.02149e+06
211-13	0.113042	728754	0.0753755	1.35159e+06	0.146388	1.14413e+06	0.0571	1.28399e+06	0.0828989	1.79286e+06	0.136006	1.22177e+06	0.119167	1.14765e+06	0.102327	3.50986e+06	0.0891183	1.17774e+06
211-130	0.0984324	1.76681e+06	0.0800941	2.13113e+06	0.115099	2.15294e+06	0.061467	1.21427e+06	0.084229	2.4063e+06	0.114254	1.43643e+06	0.116708	2.11296e+06	0.0959253	4.12155e+06	0.0966321	2.40788e+06
211-131	0.0944708	1.49829e+06	0.076074	1.28107e+06	0.117438	1.4536e+06	0.051403	839525	0.0917115	2.28103e+06	0.117383	1.57379e+06	0.116749	1.81744e+06	0.0891605	4.17082e+06	0.0873415	1.49308e+06
211-132	0.109434	2.03651e+06	0.075714	2.0279e+06	0.128118	1.45242e+06	0.0586782	1.25937e+06	0.0854121	2.44869e+06	0.123389	1.51859e+06	0.127433	1.89659e+06	0.101843	4.46331e+06	0.0913221	1.93765e+06
211-133	0.0937788	1.12397e+06	0.0817973	1.98997e+06	0.132883	1.62181e+06	0.0609363	1.15548e+06	0.123567	5.50315e+06	0.128769	1.44873e+06	0.120287	1.19011e+06	0.109157	3.3701e+06	0.0875121	1.41074e+06
211-14	0.0861358	1.9708e+06	0.0817483	3.07296e+06	0.1186	2.94931e+06	0.0522563	1.60077e+06	0.0809696	4.75641e+06	0.107436	1.89886e+06	0.105198	2.18101e+06	0.093161	6.81508e+06	0.0792574	2.1273e+06
211-15	0.0881342	2.06208e+06	0.0780147	1.94382e+06	0.134857	363878	0.0482995	2.18457e+06	0.082235	4.64122e+06	0.105828	2.00396e+06	0.103111	1.94764e+06	0.0868965	6.95381e+06	0.0889935	2.37993e+06
211-16	0.106213	1.87984e+06	0.0777896	1.74033e+06	0.129283	1.77622e+06	0.0516367	1.40115e+06	0.076893	2.8005e+06	0.116467	1.33661e+06	0.126905	1.80374e+06	0.100422	4.12396e+06	0.0948347	1.97397e+06
211-17	0.0994523	1.16102e+06	0.0871184	1.30386e+06	0.129692	1.63471e+06	0.0551496	1.5279e+06	0.0880415	2.28228e+06	0.112754	1.31186e+06	0.125941	1.69503e+06	0.091949	3.66597e+06	0.0842077	1.33198e+06
211-18	0.0851486	1.65693e+06	0.0814763	1.63003e+06	0.115098	2.53705e+06	0.0494498	1.22526e+06	0.0799466	3.73124e+06	0.103634	1.80518e+06	0.111836	2.31519e+06	0.0877826	4.99415e+06	0.0826136	1.49276e+06
211-19	0.0934519	2.84186e+06	0.0706425	1.27239e+06	-1	-1	0.0468467	1.33297e+06	0.0696782	4.50714e+06	0.103533	2.12188e+06	0.0988033	2.27258e+06	0.083618	6.54957e+06	0.0814771	2.29757e+06
211-21	0.0969196	1.47463e+06	0.0816858	1.1756e+06	-1	-1	0.0457491	722735	0.0961606	6.13509e+06	0.117376	1.51102e+06	0.119724	1.2081e+06	0.0897693	4.35465e+06	0.0805322	1.13961e+06
211-22	0.103451	2.05952e+06	0.0734977	1.31697e+06	0.126777	1.87046e+06	0.0489084	1.68429e+06	0.105649	6.26312e+06	0.109139	1.90205e+06	0.123435	1.86689e+06	0.0934784	3.71063e+06	0.0839206	1.88808e+06
211-24	0.0922465	1.24492e+06	0.0717865	982398	0.124782	2.12198e+06	0.0433874	1.85604e+06	0.0832233	2.93741e+06	0.110169	1.55976e+06	0.118347	2.01531e+06	0.0896574	3.7694e+06	0.0892521	1.69768e+06
211-25	0.089559	1.17516e+06	0.0740708	1.44314e+06	0.122828	1.99755e+06	0.0448595	1.5925e+06	0.0987641	7.18755e+06	0.113231	1.84428e+06	0.117434	1.13565e+06	0.0865498	4.15519e+06	0.0733251	1.2137e+06
211-26	0.104681	1.83202e+06	0.0803821	2.15077e+06	-1	-1	0.0505051	1.07996e+06	0.0899303	2.56819e+06	0.120493	1.16045e+06	0.13055	1.72796e+06	0.104418	4.0134e+06	0.0874308	1.54079e+06
211-27	0.106405	1.21503e+06	0.0769017	1.50013e+06	-1	-1	0.0544514	1.34588e+06	0.115115	5.05907e+06	0.120249	1.47452e+06	0.131146	1.6556e+06	0.100065	3.98775e+06	0.0927295	1.5917e+06
211-28	0.0886185	2.31835e+06	0.0803984	2.86308e+06	-1	-1	0.0614765	1.55541e+06	0.102318	8.22702e+06	0.110702	2.03921e+06	0.102573	2.69597e+06	0.0914933	6.3531e+06	0.138142	1.75727e+06
211-29	0.0906535	2.36804e+06	0.0804975	2.35496e+06	-1	-1	0.0435552	1.19909e+06	0.0748826	3.75894e+06	0.11253	1.71198e+06	0.10458	2.57159e+06	0.0855439	5.4156e+06	0.133773	1.58567e+06
211-3	0.101442	1.78301e+06	0.0828595	1.48212e+06	0.142866	1.4456e+06	0.0629865	1.20387e+06	0.0828441	2.40138e+06	0.130534	1.29546e+06	0.122991	1.78961e+06	0.0987984	3.76486e+06	0.0956772	1.83832e+06
211-30	0.100284	1.40508e+06	0.0845239	1.79664e+06	0.117389	1.54864e+06	0.0463129	3.17636e+06	0.0899651	1.97918e+06	0.116959	1.15544e+06	0.116094	1.23685e+06	0.106965	3.32784e+06	0.11259	1.07944e+06
211-32	0.101453	1.42216e+06	0.083795	1.69265e+06	0.131476	1.57199e+06	0.0584937	1.62042e+06	0.105758	4.92649e+06	0.116966	1.38466e+06	0.113231	1.35674e+06	0.0949988	3.5693e+06	0.137823	1.36296e+06
211-33	0.0922236	1.15224e+06	0.0790438	1.82281e+06	0.0996031	2.39957e+06	0.0551048	2.16674e+06	0.0862345	4.03411e+06	0.105104	2.07302e+06	0.1047	2.42172e+06	0.0976489	4.56483e+06	0.116839	1.20722e+06
211-34	0.0860609	1.95242e+06	0.0758713	2.35603e+06	-1	-1	0.055786	1.11259e+06	0.0873147	4.60307e+06	0.108676	2.09777e+06	0.0991143	2.99134e+06	0.0887788	5.8829e+06	0.130773	2.03008e+06
211-35	0.0959319	1.17803e+06	0.0854082	1.87717e+06	0.138019	1.34053e+06	0.0770139	1.46212e+06	0.087856	1.84778e+06	0.120599	1.12294e+06	0.118137	1.18658e+06	0.0960606	3.3623e+06	0.131786	1.16699e+06
211-36	0.10416	1.49294e+06	0.0790356	1.68467e+06	0.127233	1.4952e+06	0.0552943	1.16513e+06	0.0773477	2.44301e+06	0.113144	1.66622e+06	0.11656	1.95613e+06	0.0995801	3.62968e+06	0.125364	1.278e+06
211-37	0.10181	1.7096e+06	0.0809916	1.92888e+06	0.121727	2.05013e+06	0.0474758	1.39131e+06	0.083402	2.76814e+06	0.105348	1.81313e+06	0.112428	2.09032e+06	0.104665	3.46732e+06	0.131465	1.73665e+06
211-38	0.090097	1.67802e+06	0.0790586	1.89761e+06	-1	-1	0.0509373	989333	0.0797711	2.98417e+06	0.112938	1.65417e+06	0.108883	2.19896e+06	0.092447	4.06124e+06	0.134232	1.53573e+06
211-39	0.106934	2.47948e+06	0.0908042	3.44901e+06	0.138535	1.54989e+06	0.0537718	1.24895e+06	0.0869307	2.61884e+06	0.119024	1.54479e+06	0.121765	1.34319e+06	0.104249	4.37038e+06	0.13747	2.0073e+06
211-4	0.096544	1.46632e+06	0.0811861	2.52701e+06	0.141859	1.48886e+06	0.0572768	1.41704e+06	0.108204	7.00752e+06	0.13097	1.42722e+06	0.119246	1.36788e+06	0.0971633	4.52559e+06	0.0883168	2.15432e+06
211-40	0.105168	910645	0.0811332	1.63895e+06	-1	-1	0.0648951	1.46686e+06	0.0895397	2.07462e+06	0.125612	1.14094e+06	0.121913	1.77608e+06	0.0923344	3.24432e+06	0.123226	1.15943e+06
211-41	0.0910401	1.37636e+06	0.075938	1.93989e+06	0.120648	1.76369e+06	0.0615075	1.20719e+06	0.0773505	3.14977e+06	0.102668	1.3909e+06	0.109689	2.11316e+06	0.093443	5.27372e+06	0.108498	1.20552e+06
211-42	0.0978863	1.90684e+06	0.0740197	2.12046e+06	0.119096	1.85617e+06	0.064895	1.36668e+06	0.0886279	4.33138e+06	0.106314	1.8723e+06	0.106815	2.2435e+06	0.0870963	5.92498e+06	0.118537	1.50692e+06
211-43	0.107344	877816	0.0752164	1.58297e+06	0.137259	1.2629e+06	0.0711007	1.18115e+06	0.0919358	1.47702e+06	0.116842	1.02086e+06	0.124518	1.40782e+06	0.102906	3.46677e+06	0.111786	964335
211-44	0.0979941	1.4453e+06	0.064871	2.44132e+06	0.135019	352341	0.0497994	1.30388e+06	0.0826269	3.03249e+06	0.106186	2.17458e+06	0.112165	2.25821e+06	0.0978477	4.38953e+06	0.121286	1.96103e+06
211-46	0.0890648	1.119e+06	0.0753496	1.47549e+06	0.120819	2.1015e+06	0.0586281	1.4294e+06	0.0802099	3.95255e+06	0.104758	2.04808e+06	0.108764	2.17056e+06	0.0926869	5.10823e+06	0.108432	933940
211-5	0.0928	1.58562e+06	0.0755418	1.58599e+06	-1	-1	0.0605394	1.89272e+06	0.0768495	3.76147e+06	0.119508	1.90826e+06	0.114447	2.33541e+06	0.0889764	5.19761e+06	0.0841439	1.52456e+06
211-51	0.112917	1.06284e+06	0.0684581	1.41381e+06	-1	-1	0.0631376	611462	0.10537	4.73409e+06	0.12394	1.02694e+06	0.123973	1.01669e+06	0.0980429	3.70788e+06	0.12829	1.14863e+06
211-52	0.110241	2.20313e+06	0.0732533	2.29057e+06	-1	-1	0.0696692	1.70257e+06	0.0833356	2.57736e+06	0.116074	1.10029e+06	0.123505	1.54083e+06	0.0985316	3.9523e+06	0.11314	1.20921e+06
211-53	0.0959992	1.6328e+06	0.0787085	2.71302e+06	-1	-1	0.0763651	1.7104e+06	0.101059	8.1619e+06	0.122511	1.51247e+06	0.10518	2.90228e+06	0.0895044	6.1634e+06	0.0960127	1.89664e+06
211-55	0.105675	1.3985e+06	0.0817181	1.78881e+06	0.11704	1.54268e+06	0.0549843	1.74227e+06	0.0792981	2.2122e+06	0.133418	1.32562e+06	0.127008	1.61138e+06	0.0978486	3.64384e+06	0.0957754	1.499e+06
211-56	0.106146	850293	0.0843331	1.24112e+06	0.114166	1.6161e+06	0.0534191	1.76299e+06	0.0920315	2.18134e+06	0.131448	1.19927e+06	0.115664	1.13587e+06	0.0938922	3.22529e+06	0.101568	1.67813e+06
211-57	0.0984808	1.85005e+06	0.0852375	1.58358e+06	0.109094	2.60192e+06	0.0568875	1.48623e+06	0.0870677	2.87331e+06	0.13008	1.6768e+06	0.106594	1.67899e+06	0.0839852	4.77708e+06	0.100004	1.72193e+06
211-59	0.100552	1.10959e+06	0.0907549	1.68667e+06	-1	-1	0.0653893	1.57961e+06	0.0970406	1.92655e+06	0.138905	1.17165e+06	0.123835	1.66611e+06	0.102519	3.81941e+06	0.10637	1.65597e+06
211-6	0.0919222	1.98497e+06	0.0760733	1.94062e+06	0.141879	2.14055e+06	0.0491323	1.97095e+06	0.0681004	5.08272e+06	0.12032	2.15837e+06	0.108262	2.66367e+06	0.09325	5.92303e+06	0.0831126	2.09016e+06
211-60	0.105845	1.71189e+06	0.0865113	1.79082e+06	-1	-1	0.0740089	1.33966e+06	0.0898728	2.23721e+06	0.135449	1.21023e+06	0.118201	1.73582e+06	0.0947407	3.92666e+06	0.105407	1.93001e+06
211-61	0.105218	2.0602e+06	0.0822129	2.09451e+06	-1	-1	0.0531546	2.02929e+06	0.105422	5.13563e+06	0.129925	1.33001e+06	0.114408	1.43939e+06	0.0925192	4.32096e+06	0.105692	2.1701e+06
211-62	0.0953275	1.42181e+06	0.0813576	2.1759e+06	0.113971	1.94049e+06	0.0607279	1.62047e+06	0.0836263	2.54186e+06	0.127371	1.3095e+06	0.116294	2.12433e+06	0.0934826	4.90708e+06	0.100833	1.6693e+06
211-63	0.106638	828417	0.0895337	1.9762e+06	-1	-1	0.0601383	1.79223e+06	0.0907635	2.19888e+06	0.138282	1.08074e+06	0.130065	1.60409e+06	0.103454	3.79523e+06	0.0927608	1.19937e+06
211-64	0.108256	991418	0.0776722	1.36972e+06	-1	-1	0.0467956	1.07003e+06	0.0903234	2.29781e+06	0.137683	1.1435e+06	0.128371	1.49795e+06	0.0921799	3.6878e+06	0.096229	1.4383e+06
211-65	0.0879844	1.52999e+06	0.0753597	2.0097e+06	-1	-1	0.0452413	1.0548e+06	0.0850486	3.80269e+06	0.105052	1.86672e+06	0.0997819	2.69319e+06	0.0944137	5.54438e+06	0.093264	2.40698e+06
211-66	0.0839995	1.58778e+06	0.0739075	1.92349e+06	0.0972702	3.00495e+06	0.0573553	1.27205e+06	0.0835894	3.6897e+06	0.106042	2.13646e+06	0.102942	3.08184e+06	0.0888655	5.78109e+06	0.0945503	2.07318e+06
211-67	0.108438	1.26598e+06	0.0799166	2.18461e+06	0.116125	1.4376e+06	0.0654515	1.28705e+06	0.0934799	2.09702e+06	0.116515	1.41383e+06	0.12292	1.81688e+06	0.0958507	3.94966e+06	0.0961055	1.70047e+06
211-68	0.0965629	1.62273e+06	0.0773495	1.3234e+06	-1	-1	0.0468342	1.20608e+06	0.0865394	2.95665e+06	0.118067	1.26153e+06	0.12281	1.7901e+06	0.0877066	3.77482e+06	0.0917286	1.35593e+06
211-69	0.0912768	2.40749e+06	0.0782375	2.19321e+06	-1	-1	0.0575253	1.22277e+06	0.0881911	3.68634e+06	0.108684	1.77963e+06	0.101649	2.23704e+06	0.0892948	4.81469e+06	0.0929621	2.09188e+06
211-7	0.11271	1.46876e+06	0.0858588	2.40314e+06	0.140473	1.36532e+06	0.0488706	1.98168e+06	0.0829851	2.24558e+06	0.125399	1.15821e+06	0.125279	1.71206e+06	0.103666	3.85394e+06	0.0803848	1.30911e+06
211-70	0.0965435	2.87074e+06	0.0835708	2.53783e+06	-1	-1	0.053846	1.19244e+06	0.0840296	4.14271e+06	0.106299	1.68665e+06	0.101665	2.23784e+06	0.088092	6.88513e+06	0.10501	2.38109e+06
211-71	0.111254	2.13112e+06	0.0775509	2.03101e+06	0.114078	1.84522e+06	0.0559434	1.20129e+06	0.112419	6.48396e+06	0.119462	1.51962e+06	0.120245	1.45145e+06	0.106636	4.41878e+06	0.101715	2.16471e+06
211-72	0.110679	2.40959e+06	0.0753892	1.56357e+06	0.112084	1.78133e+06	0.061489	1.37124e+06	0.0887336	2.88189e+06	0.115484	1.79272e+06	0.117722	2.01573e+06	0.0951453	4.19333e+06	0.0893575	1.71027e+06
211-73	0.0914794	1.20262e+06	0.0734544	1.20389e+06	0.111418	1.86913e+06	0.0487467	925509	0.105697	6.57889e+06	0.122697	1.525e+06	0.115597	1.37751e+06	0.0920308	4.17007e+06	0.0873199	1.08232e+06
211-74	0.0918703	1.2558e+06	0.0766345	1.68565e+06	0.107351	1.81019e+06	0.0486378	877528	0.100481	7.62024e+06	0.112856	1.58788e+06	0.112469	2.03911e+06	0.0907975	4.54943e+06	0.0944406	1.94494e+06
211-75	0.10181	2.1993e+06	0.0760303	1.60764e+06	-1	-1	0.0602867	1.00227e+06	0.099776	2.259e+06	0.126413	1.38141e+06	0.13071	1.77188e+06	0.108431	3.70603e+06	0.106023	2.09964e+06
211-77	0.0978449	2.08741e+06	0.0788775	2.11747e+06	0.105614	2.79799e+06	0.0579906	1.25035e+06	0.0980361	7.39072e+06	0.104784	2.01752e+06	0.102093	1.88357e+06	0.08352	5.91867e+06	0.0796504	2.29035e+06
211-78	0.0966721	1.65267e+06	0.0835955	1.60345e+06	-1	-1	0.0537198	1.00571e+06	0.0815405	3.49225e+06	0.107094	1.95304e+06	0.104518	2.45994e+06	0.0857553	5.69196e+06	0.0868362	2.11091e+06
211-8	0.100793	1.51771e+06	0.0740929	2.01425e+06	-1	-1	0.0592781	999047	0.0893747	2.37589e+06	0.136656	1.67009e+06	0.117767	1.66462e+06	0.0942332	4.70006e+06	0.0858285	1.47744e+06
211-80	0.0990023	1.45356e+06	0.0834586	1.88687e+06	0.11225	2.12809e+06	0.0635741	1.58846e+06	0.0808485	2.64259e+06	0.115536	1.85987e+06	0.112806	2.1668e+06	0.0982613	3.78502e+06	0.0825183	2.58006e+06
211-81	0.0952856	2.27445e+06	0.0844443	2.80843e+06	-1	-1	0.0656696	1.39147e+06	0.0833429	3.67596e+06	0.111166	1.91203e+06	0.104907	1.82456e+06	0.0961432	5.59813e+06	0.0842558	3.12108e+06
211-82	0.0925305	2.29832e+06	0.0840774	2.73074e+06	0.0996099	2.69063e+06	0.0695467	1.4792e+06	0.0787939	3.19379e+06	0.10392	1.82929e+06	0.100117	2.75429e+06	0.0889642	6.48083e+06	0.0838528	2.3549e+06
211-83	0.101635	1.85686e+06	0.085738	2.12788e+06	-1	-1	0.05953	1.34385e+06	0.104892	5.42197e+06	0.109101	1.50993e+06	0.115326	2.01995e+06	0.0957357	4.09118e+06	0.0823443	2.30828e+06
211-84	0.094834	1.35339e+06	0.0844587	1.97467e+06	0.118797	1.80242e+06	0.0702311	1.29582e+06	0.0938913	2.90968e+06	0.120152	1.64172e+06	0.111271	1.33154e+06	0.0994147	4.05994e+06	0.0845755	2.07614e+06
211-85	0.0963159	1.81292e+06	0.0783468	1.60168e+06	0.110102	1.92324e+06	0.053276	1.15201e+06	0.0787817	2.16427e+06	0.116795	1.67826e+06	0.112482	2.08781e+06	0.0929518	4.11997e+06	0.0839553	2.21683e+06
211-86	0.096808	1.6829e+06	0.0891141	1.68412e+06	-1	-1	0.0569062	1.01576e+06	0.0895815	2.66112e+06	0.110598	1.43535e+06	0.114093	1.86492e+06	0.0961375	4.10133e+06	0.0858299	1.93967e+06
211-9	0.0958162	1.198e+06	0.0686119	1.31168e+06	0.138423	1.6276e+06	0.0482134	1.11199e+06	0.0853957	2.40487e+06	0.137082	1.51313e+06	0.123461	1.37462e+06	0.0963993	4.33281e+06	0.0870455	1.2194e+06
212-1	0.104277	2.28103e+06	0.0878118	3.59989e+06	0.129584	2.77007e+06	0.0485502	1.14021e+06	0.0776887	3.50331e+06	0.109339	1.757e+06	0.0982879	2.06346e+06	0.092252	5.44291e+06	0.0814236	3.03651e+06
212-10	0.105071	2.40007e+06	0.0832536	2.32625e+06	0.126271	2.31957e+06	0.040415	1.4334e+06	0.0701829	5.2012e+06	0.115431	1.69725e+06	0.0953851	2.95392e+06	0.0927106	5.64975e+06	0.0817093	2.34455e+06
212-11	0.115304	2.35763e+06	0.0889004	2.22053e+06	0.134727	1.76129e+06	0.0614351	1.66178e+06	0.0827231	2.53597e+06	0.121648	1.4369e+06	0.109977	1.69879e+06	0.11039	4.33093e+06	0.0912424	2.4541e+06
212-120	0.10477	1.41937e+06	0.0959776	2.15137e+06	0.106649	1.82549e+06	0.0591598	1.57743e+06	0.0992394	6.49983e+06	0.107564	1.35913e+06	0.102835	2.22694e+06	0.101453	4.81293e+06	0.08902	1.9902e+06
212-121	0.0880231	2.68636e+06	0.083299	3.09023e+06	0.101866	2.49152e+06	0.0447922	2.45588e+06	0.0810818	4.20227e+06	0.104576	1.88097e+06	0.100454	2.70304e+06	0.0948059	6.88023e+06	0.0852006	3.03357e+06
212-122	0.0794449	2.28939e+06	0.0800571	3.66066e+06	0.0978921	3.11397e+06	0.0769928	2.14591e+06	0.0801334	3.97912e+06	0.0991582	2.15463e+06	0.0931225	3.09689e+06	0.100914	6.95999e+06	0.0839974	4.24943e+06
212-123	0.0998704	1.30983e+06	0.0818972	2.01541e+06	0.114063	2.00753e+06	0.0390561	2.29317e+06	0.0935349	2.82545e+06	0.113684	1.36459e+06	0.113435	1.86314e+06	0.109346	3.8815e+06	0.0879782	1.82617e+06
212-124	0.0953911	2.35185e+06	0.0864487	3.42465e+06	0.106013	2.15139e+06	0.0726284	1.84658e+06	0.103758	7.33163e+06	0.105938	1.57722e+06	0.100711	2.38473e+06	0.0968949	5.64008e+06	0.0915363	3.30113e+06
212-126	0.0900338	2.51652e+06	0.0795084	3.2233e+06	0.101411	2.88413e+06	0.0708569	1.92942e+06	0.0900434	5.94315e+06	0.108896	2.17996e+06	0.0975459	2.23551e+06	0.0998414	7.39062e+06	0.0859264	2.64909e+06
212-127	0.0853316	3.98976e+06	0.0714154	2.87506e+06	0.0954212	3.77171e+06	0.0422337	2.81237e+06	0.113908	1.04429e+07	0.0993891	2.74231e+06	0.0901368	3.85793e+06	0.0963488	9.18934e+06	0.072953	2.81151e+06
212-128	0.102108	2.2838e+06	0.0801027	1.82276e+06	0.112123	2.18902e+06	0.0417434	2.06827e+06	0.0834105	2.42869e+06	0.109085	1.47794e+06	0.107639	2.2052e+06	0.100737	4.39049e+06	0.0907862	2.18401e+06
212-129	0.0877165	2.86705e+06	0.0870979	3.72094e+06	0.0978637	2.80745e+06	0.066046	1.73697e+06	0.0832108	5.40517e+06	0.108667	1.97816e+06	0.0962274	2.90888e+06	0.0981041	7.54047e+06	0.0897473	3.33527e+06
212-13	0.11556	1.37696e+06	0.0887668	2.61908e+06	0.113608	1.75534e+06	0.0463635	825555	0.0844218	2.35099e+06	0.106103	1.3298e+06	0.0964542	1.62699e+06	0.110406	3.83001e+06	0.083711	2.36334e+06
212-130	0.103139	2.17712e+06	0.08568	2.499e+06	0.111502	2.19449e+06	0.0612509	2.14736e+06	0.0852226	2.53126e+06	0.101672	1.27437e+06	0.108981	2.0755e+06	0.103753	4.7835e+06	0.0934888	3.22781e+06
212-131	0.0905426	2.65937e+06	0.0834475	2.37548e+06	0.106787	2.41757e+06	0.0570598	2.01795e+06	0.0915575	3.46016e+06	0.105733	1.60633e+06	0.102157	2.43882e+06	0.106131	5.19856e+06	0.0867167	2.52401e+06
212-132	0.113238	2.41105e+06	0.0876924	2.61852e+06	0.11972	1.84771e+06	0.0663125	1.68449e+06	0.0851601	2.44472e+06	0.109218	1.14754e+06	0.113778	1.96027e+06	0.106583	4.46142e+06	0.0924224	2.60073e+06
212-133	0.09023	1.46269e+06	0.0827446	3.15032e+06	0.110772	2.22129e+06	0.0615613	1.1975e+06	0.102975	6.58963e+06	0.112971	1.69736e+06	0.101806	1.62729e+06	0.100367	5.07677e+06	0.085953	2.16117e+06
212-14	0.101849	2.15521e+06	0.0854973	5.74529e+06	0.111752	2.72623e+06	0.051656	944835	0.0798044	4.5666e+06	0.0953808	2.09968e+06	0.0950777	2.1942e+06	0.0912855	6.51076e+06	0.0801221	2.89261e+06
212-15	0.0976942	2.44281e+06	0.085376	3.62348e+06	0.104422	2.68171e+06	0.0422269	636069	0.0756602	5.24968e+06	0.0994675	1.84235e+06	0.0925346	2.22259e+06	0.087085	7.22146e+06	0.0861408	3.18665e+06
212-16	0.119012	1.8959e+06	0.0854851	2.70504e+06	0.120468	1.70842e+06	0.0514734	753258	0.0738548	2.91581e+06	0.105674	1.16243e+06	0.114005	1.65493e+06	0.0994941	4.026e+06	0.0907819	2.43287e+06
212-17	0.107357	2.05142e+06	0.0808297	2.2729e+06	0.118833	2.2944e+06	0.0454728	1.36533e+06	0.0830658	3.58162e+06	0.0971877	1.61152e+06	0.0989611	2.76065e+06	0.102363	5.09261e+06	0.0812326	2.52893e+06
212-18	0.0933972	2.71053e+06	0.0812341	2.61083e+06	0.112796	3.00811e+06	0.042575	1.26028e+06	0.0815537	5.48754e+06	0.0945738	2.11377e+06	0.0941951	3.44052e+06	0.096436	6.90376e+06	0.0804558	2.78723e+06
212-19	0.0977107	2.70094e+06	0.0765457	2.47257e+06	0.10329	3.15585e+06	0.0502583	843556	0.0656199	6.38909e+06	0.0956528	2.34186e+06	0.0897707	2.85034e+06	0.0845799	8.10127e+06	0.0784756	2.91742e+06
212-21	0.105165	2.44116e+06	0.0805131	2.0693e+06	0.121418	1.86245e+06	-1	-1	0.0895569	7.14919e+06	0.111354	1.28461e+06	0.10427	1.82072e+06	0.100561	4.84101e+06	0.0797719	1.51688e+06
212-22	0.102052	3.15676e+06	0.073676	2.38711e+06	0.10753	2.82308e+06	0.0509541	1.57426e+06	0.0994234	9.04554e+06	0.0960085	2.00446e+06	0.0907521	3.39921e+06	0.0912343	6.66712e+06	0.0779389	2.64616e+06
212-24	0.0987109	1.49847e+06	0.0723137	1.29787e+06	0.117438	2.11869e+06	0.0532483	1.22962e+06	0.0809313	3.67927e+06	0.0994788	1.1767e+06	0.104317	2.39495e+06	0.0978246	4.33353e+06	0.0918207	2.70359e+06
212-25	0.0871213	2.04752e+06	0.0743916	1.6643e+06	0.113667	2.52072e+06	0.0375801	1.16489e+06	0.0979533	9.15972e+06	0.102831	2.22902e+06	0.0933889	2.27977e+06	0.0963329	5.62497e+06	0.0747145	2.10006e+06
212-26	0.118761	1.57618e+06	0.0900334	3.74919e+06	0.11844	1.4085e+06	0.0505048	672051	0.0846235	2.8972e+06	0.102936	1.02233e+06	0.117122	1.50709e+06	0.09995	3.98004e+06	0.0855284	1.94075e+06
212-27	0.10302	1.97304e+06	0.0772509	2.2856e+06	0.119497	2.12234e+06	0.0626703	1.39996e+06	0.103384	6.65902e+06	0.103073	1.86045e+06	0.0994059	2.64909e+06	0.100074	5.3544e+06	0.0874485	2.81829e+06
212-28	0.0964216	3.81585e+06	0.0863728	4.46992e+06	0.11605	2.70511e+06	0.072829	2.09091e+06	0.101704	9.34396e+06	0.121676	1.85166e+06	0.0989901	2.84707e+06	0.0965298	7.15679e+06	0.141627	2.01408e+06
212-29	0.0913652	3.76042e+06	0.0882502	2.93074e+06	0.110451	2.66338e+06	0.0485908	2.39798e+06	0.0757175	4.9301e+06	0.131438	1.6845e+06	0.0949784	3.02908e+06	0.0985586	6.95496e+06	0.133368	1.99731e+06
212-3	0.113016	2.53625e+06	0.092627	2.37511e+06	0.136624	1.78024e+06	0.0598441	1.2655e+06	0.0800012	2.58895e+06	0.116403	1.24887e+06	0.109999	2.17599e+06	0.108608	4.46033e+06	0.09347	2.90291e+06
212-30	0.115766	1.88078e+06	0.0996165	2.85988e+06	0.117314	1.74171e+06	0.0468114	1.3499e+06	0.0816127	2.55465e+06	0.102534	1.04343e+06	0.108099	1.37205e+06	0.106401	3.62503e+06	0.119755	1.54264e+06
212-32	0.105516	2.22992e+06	0.0896603	2.58511e+06	0.117849	2.08984e+06	0.0588238	2.22631e+06	0.0965637	6.63303e+06	0.108815	1.67261e+06	0.10106	1.80729e+06	0.101171	5.02164e+06	0.135132	1.9116e+06
212-33	0.0920143	1.86531e+06	0.0823999	2.73596e+06	0.111064	2.88801e+06	0.0531271	2.38113e+06	0.077729	5.80042e+06	0.116861	1.99332e+06	0.0959339	2.80559e+06	0.10243	6.27689e+06	0.124165	1.71075e+06
212-34	0.0931788	3.44551e+06	0.0785796	2.88647e+06	0.102791	3.14228e+06	0.0509044	2.46403e+06	0.0829176	7.63196e+06	0.130637	2.39233e+06	0.0883364	3.85718e+06	0.0956269	8.42512e+06	0.131379	2.42772e+06
212-35	0.105777	1.97713e+06	0.0929058	3.04606e+06	0.126478	1.96899e+06	0.0698059	2.0609e+06	0.0774255	2.95891e+06	0.110995	1.56712e+06	0.105634	1.61085e+06	0.10936	4.12972e+06	0.135344	2.04897e+06
212-36	0.0988423	2.38302e+06	0.0865004	2.56532e+06	0.105647	2.51194e+06	0.066388	2.12165e+06	0.0717734	5.2938e+06	0.105854	1.98632e+06	0.0948217	2.95628e+06	0.100649	5.8894e+06	0.122766	1.92327e+06
212-37	0.110406	1.73211e+06	0.0922467	2.6344e+06	0.116387	2.09045e+06	0.0538555	2.42439e+06	0.0923227	3.55442e+06	0.101684	1.33819e+06	0.10792	2.08685e+06	0.113349	3.84981e+06	0.138173	1.98622e+06
212-38	0.0923833	2.25399e+06	0.0878285	2.4854e+06	0.110633	2.19384e+06	0.0510029	1.98614e+06	0.073141	4.3965e+06	0.112223	1.70407e+06	0.099139	2.69419e+06	0.1013	5.29234e+06	0.134296	1.89386e+06
212-39	0.117963	2.46664e+06	0.0976942	4.1196e+06	0.108468	2.02358e+06	0.0708262	1.82259e+06	0.0868787	2.65125e+06	0.102687	995236	0.110268	1.25709e+06	0.100699	4.01562e+06	0.145051	2.14395e+06
212-4	0.110025	1.69007e+06	0.0897066	3.73133e+06	0.118896	1.88321e+06	0.0534743	1.06502e+06	0.0998472	7.49406e+06	0.112707	1.45222e+06	0.0960797	1.81579e+06	0.0945851	4.94693e+06	0.0856514	2.79101e+06
212-40	0.107548	1.46831e+06	0.091349	2.31336e+06	0.11668	1.60352e+06	0.0553775	1.61147e+06	0.0862814	2.91992e+06	0.109153	1.23967e+06	0.104341	2.22535e+06	0.104402	4.08088e+06	0.134476	1.39649e+06
212-41	0.0898616	1.62547e+06	0.0833083	2.81445e+06	0.114569	2.12674e+06	0.0673308	781347	0.0805749	3.1088e+06	0.0997136	881944	0.103228	2.29355e+06	0.103743	5.47191e+06	0.124075	1.31088e+06
212-42	0.0955059	2.74712e+06	0.0797341	3.32035e+06	0.110373	2.62162e+06	0.0698109	1.99696e+06	0.0886635	5.74239e+06	0.0973136	2.43266e+06	0.0916673	3.07783e+06	0.0978728	6.94031e+06	0.124647	2.23451e+06
212-43	0.134046	1.18073e+06	0.0908982	2.41867e+06	0.117394	1.70832e+06	0.0528927	1.21933e+06	0.0789166	2.3794e+06	0.0974389	1.28963e+06	0.106084	1.48157e+06	0.108804	3.58146e+06	0.12058	1.32829e+06
212-44	0.101842	1.33836e+06	0.082096	2.53351e+06	0.117122	2.041e+06	0.0508293	2.24463e+06	0.0858145	3.74479e+06	0.100236	1.74939e+06	0.1027	2.45195e+06	0.103099	5.05172e+06	0.136304	1.96139e+06
212-46	0.0918734	2.1813e+06	0.0723279	2.32971e+06	0.11058	3.12451e+06	0.0589878	2.00888e+06	0.0845845	6.15939e+06	0.0977801	2.64504e+06	0.0929852	3.38366e+06	0.101772	7.1576e+06	0.115248	1.45966e+06
212-5	0.0937901	2.3801e+06	0.0869652	3.17162e+06	0.13206	2.02808e+06	0.0537535	1.6164e+06	0.073842	5.32265e+06	0.108889	1.92095e+06	0.0988646	3.04802e+06	0.0994437	6.64914e+06	0.0800539	2.56942e+06
212-51	0.122153	1.4274e+06	0.0820162	1.90872e+06	0.131226	1.50236e+06	0.0646431	955213	0.0984795	5.70851e+06	0.115922	892608	0.111041	1.31516e+06	0.106132	4.006e+06	0.136999	1.40365e+06
212-52	0.124657	1.98968e+06	0.0875235	3.50351e+06	0.113261	1.56545e+06	0.0644875	1.16079e+06	0.0776775	3.42151e+06	0.0993144	1.22073e+06	0.102763	1.69289e+06	0.09857	4.34563e+06	0.119952	1.53861e+06
212-53	0.0929692	1.98844e+06	0.0894266	3.24381e+06	0.0993318	2.7066e+06	0.0707711	1.28691e+06	0.0979818	8.36695e+06	0.119691	1.12707e+06	0.100253	2.74417e+06	0.0902458	6.75401e+06	0.10251	2.135e+06
212-55	0.109989	1.82119e+06	0.09499	2.42173e+06	0.111511	1.91847e+06	0.047558	1.33601e+06	0.0779697	2.70713e+06	0.120135	1.36478e+06	0.113259	2.24988e+06	0.109779	4.00576e+06	0.102706	1.85451e+06
212-56	0.102938	1.55863e+06	0.0900969	2.22579e+06	0.100035	2.39431e+06	0.0626792	1.81517e+06	0.0877447	3.50231e+06	0.117428	1.85378e+06	0.0972861	2.15406e+06	0.108412	4.37606e+06	0.104482	2.30571e+06
212-57	0.10156	3.18707e+06	0.0902126	2.75372e+06	0.102318	3.03223e+06	0.0510214	1.05035e+06	0.0846163	3.12188e+06	0.126194	2.36704e+06	0.0981388	2.44417e+06	0.0954086	6.98166e+06	0.100592	2.26454e+06
212-59	0.106409	1.56566e+06	0.0986927	2.22102e+06	0.106581	1.77855e+06	0.0528758	1.0628e+06	0.0907845	2.57682e+06	0.119943	994447	0.108979	2.22605e+06	0.10801	4.13976e+06	0.10715	2.00207e+06
212-6	0.0987329	3.03249e+06	0.0844103	3.96125e+06	0.120455	2.41287e+06	0.0535875	1.14415e+06	0.0635187	9.34578e+06	0.104365	2.47971e+06	0.0873048	3.29625e+06	0.085608	8.93318e+06	0.0782995	3.14153e+06
212-60	0.0978194	3.10358e+06	0.0925509	2.66268e+06	0.0953293	2.57106e+06	0.0599073	1.71601e+06	0.0771762	4.40009e+06	0.123794	1.55095e+06	0.100994	2.90376e+06	0.0925879	6.61866e+06	0.103394	2.76213e+06
212-61	0.111288	2.55189e+06	0.0953315	2.74215e+06	0.107269	2.12258e+06	0.0637162	1.42269e+06	0.09957	6.36601e+06	0.12341	1.55774e+06	0.106598	1.90434e+06	0.0970036	5.03399e+06	0.106171	2.54e+06
212-62	0.107319	2.08137e+06	0.090495	2.68399e+06	0.102738	2.55123e+06	0.0498769	1.29505e+06	0.0795188	3.08626e+06	0.117849	1.85011e+06	0.105443	2.93462e+06	0.0991143	5.5643e+06	0.0999484	2.06472e+06
212-63	0.1261	1.08187e+06	0.104996	2.76799e+06	0.108991	1.33609e+06	0.0593185	1.1134e+06	0.0870239	2.59319e+06	0.113702	944629	0.110059	1.53627e+06	0.104335	3.55215e+06	0.104887	1.68913e+06
212-64	0.0998748	1.1603e+06	0.0895181	2.08679e+06	0.101052	1.74166e+06	0.0461635	1.2603e+06	0.0838082	2.92873e+06	0.117975	1.23846e+06	0.104444	2.41412e+06	0.101849	4.43693e+06	0.0980401	1.78315e+06
212-65	0.104623	1.74409e+06	0.0846324	3.75593e+06	0.0927715	2.44257e+06	0.0489514	706747	0.0816249	4.16701e+06	0.0951728	1.83995e+06	0.0937463	2.38968e+06	0.0920949	5.67748e+06	0.0942094	2.63798e+06
212-66	0.0817504	2.3945e+06	0.0797616	3.04953e+06	0.0945702	3.11421e+06	0.0575983	1.58565e+06	0.0753369	4.87901e+06	0.0967479	2.40995e+06	0.0936449	3.53791e+06	0.0958713	7.6387e+06	0.097747	2.70697e+06
212-67	0.11074	1.25187e+06	0.0912792	2.41084e+06	0.110386	1.51344e+06	0.0697332	1.27574e+06	0.0910482	2.30225e+06	0.107408	815211	0.113794	1.7397e+06	0.102593	3.7475e+06	0.107611	2.2167e+06
212-68	0.0992967	2.58889e+06	0.0833024	1.87882e+06	0.099167	1.84845e+06	0.0533578	1.27055e+06	0.0853345	3.593e+06	0.107178	1.68109e+06	0.103662	2.37519e+06	0.0956939	4.92002e+06	0.0933901	1.8048e+06
212-69	0.0907736	3.14965e+06	0.081403	2.86598e+06	0.0965955	2.90601e+06	0.0561923	1.48553e+06	0.0829786	5.05115e+06	0.102684	2.03148e+06	0.096187	2.52563e+06	0.0988308	6.31629e+06	0.0914175	2.25029e+06
212-7	0.120623	1.7066e+06	0.0959275	3.25217e+06	0.121653	1.69417e+06	-1	-1	0.0827153	2.55411e+06	0.100016	1.12386e+06	0.103453	1.73666e+06	0.105604	3.96386e+06	0.0787475	1.74767e+06
212-70	0.0937975	4.79698e+06	0.0846649	5.231e+06	0.093026	3.64134e+06	0.047265	1.54529e+06	0.0729509	5.8882e+06	0.0956883	2.63545e+06	0.0896756	3.35951e+06	0.0993434	9.28677e+06	0.100336	3.41126e+06
212-71	0.10892	2.47092e+06	0.0864811	2.76149e+06	0.106032	2.12178e+06	0.0501149	2.01476e+06	0.0982533	7.91881e+06	0.109337	1.5941e+06	0.106081	1.93141e+06	0.0991181	5.16456e+06	0.104922	2.61985e+06
212-72	0.108965	2.69859e+06	0.0815592	3.00461e+06	0.0941086	2.43433e+06	0.0674721	1.60899e+06	0.077565	4.79993e+06	0.0955339	2.2235e+06	0.0937755	2.6098e+06	0.0880061	6.04105e+06	0.0857007	2.2078e+06
212-73	0.10687	1.97176e+06	0.075271	1.89039e+06	0.105523	2.37782e+06	0.0622949	1.71208e+06	0.099059	7.84429e+06	0.111734	1.80181e+06	0.104707	1.92925e+06	0.100665	4.8682e+06	0.0904048	1.60052e+06
212-74	0.0943835	2.01173e+06	0.0782466	2.6422e+06	0.0972348	2.6754e+06	0.04586	1.21372e+06	0.0980038	9.23031e+06	0.0999854	2.01438e+06	0.0980076	2.84276e+06	0.098816	5.37692e+06	0.0956534	2.44844e+06
212-75	0.106804	2.51834e+06	0.0849914	2.32096e+06	0.113207	1.42393e+06	0.0663429	1.31084e+06	0.0907518	2.73613e+06	0.115766	1.0674e+06	0.118958	1.82547e+06	0.103426	4.34786e+06	0.112427	2.40353e+06
212-77	0.0945458	2.99293e+06	0.0882876	3.00304e+06	0.102775	2.86826e+06	0.0498529	1.15385e+06	0.0971561	8.9375e+06	0.102506	1.98942e+06	0.0962256	2.37488e+06	0.0962492	6.8899e+06	0.0789676	3.12949e+06
212-78	0.0986304	2.09497e+06	0.0945615	3.01804e+06	0.0965909	2.42203e+06	0.0498061	1.63266e+06	0.0727544	3.67735e+06	0.0936037	1.934e+06	0.0929705	2.76929e+06	0.0956659	5.77006e+06	0.0835944	2.71021e+06
212-8	0.100854	3.00045e+06	0.0863206	3.12083e+06	0.113742	2.74471e+06	0.0467018	924726	0.0727269	6.81599e+06	0.121118	1.78337e+06	0.095323	2.66643e+06	0.0903771	8.18363e+06	0.0828364	2.14402e+06
212-80	0.0944935	1.62541e+06	0.0925727	2.51164e+06	0.102688	2.23581e+06	0.0545699	1.28834e+06	0.0785753	3.1731e+06	0.106801	1.85726e+06	0.0981425	2.51186e+06	0.10582	4.75696e+06	0.0883578	2.86233e+06
212-81	0.0985964	2.53049e+06	0.0935745	4.32329e+06	0.0990925	2.48039e+06	0.0512144	1.84502e+06	0.0749758	3.90884e+06	0.102913	1.86359e+06	0.0974891	1.92235e+06	0.0942884	6.15499e+06	0.0872649	3.3589e+06
212-82	0.102255	2.77869e+06	0.0900961	4.78938e+06	0.0924373	3.2937e+06	0.0613918	1.85706e+06	0.0674524	6.3168e+06	0.0892837	2.39905e+06	0.0894115	3.14518e+06	0.0929678	7.88116e+06	0.0838491	2.80152e+06
212-83	0.112395	2.24941e+06	0.0962289	2.66117e+06	0.107819	2.00322e+06	0.0566148	2.18482e+06	0.0933623	6.6872e+06	0.104198	1.40911e+06	0.103571	2.35693e+06	0.101631	4.47906e+06	0.086931	2.19489e+06
212-84	0.0893727	2.4065e+06	0.0889005	3.91658e+06	0.0990959	3.07049e+06	0.0637822	1.7889e+06	0.0699461	6.48351e+06	0.10441	2.30407e+06	0.0905961	2.36757e+06	0.0894068	7.63962e+06	0.0847972	2.8005e+06
212-85	0.0932855	2.25691e+06	0.0899911	2.30134e+06	0.106518	2.14909e+06	0.0529994	2.20156e+06	0.076939	2.59147e+06	0.109134	1.57188e+06	0.104553	2.33108e+06	0.104836	4.55295e+06	0.0843606	2.72538e+06
212-86	0.099146	1.99767e+06	0.0944532	3.23881e+06	0.100604	2.10225e+06	0.0607507	1.67211e+06	0.0810729	3.50202e+06	0.09689	1.5414e+06	0.0972958	2.25423e+06	0.0958686	4.87183e+06	0.0829801	2.49811e+06
212-9	0.113985	1.76535e+06	0.0817737	2.44175e+06	0.134855	1.75544e+06	0.0426654	898907	0.0821691	2.81886e+06	0.116405	1.39235e+06	0.108419	1.66363e+06	0.0992254	4.51364e+06	0.0803263	2.17031e+06
213-1	0.0859559	2.37679e+06	0.0632222	2.33789e+06	0.112601	2.52015e+06	0.0555878	2.26111e+06	0.1014	9.11547e+06	0.0957194	1.88299e+06	0.0872546	2.3706e+06	0.0869112	5.96184e+06	0.0761881	1.97749e+06
213-10	0.107036	1.88682e+06	0.0679991	1.7113e+06	0.131287	1.44332e+06	0.0553861	1.35567e+06	0.103533	5.64739e+06	0.102077	1.25636e+06	0.107027	2.09131e+06	0.0920728	3.75984e+06	0.0801051	1.55385e+06
213-11	0.0881077	2.94114e+06	0.0681891	2.10099e+06	0.119172	2.47448e+06	0.0673351	2.11651e+06	0.0972273	8.68435e+06	0.100451	1.98079e+06	0.0933891	2.32563e+06	0.0895773	5.40992e+06	0.0804366	2.0906e+06
213-120	0.106062	1.36132e+06	0.0738467	1.21461e+06	0.124697	1.0083e+06	0.0674559	1.00999e+06	0.108503	4.91894e+06	0.125272	1.00336e+06	0.11612	1.60279e+06	0.0956476	3.8935e+06	0.0707921	912554
213-121	0.0951666	2.90228e+06	0.067658	2.41419e+06	0.0974285	2.44283e+06	0.0426711	1.79462e+06	0.0977099	8.31685e+06	0.0958824	1.74902e+06	0.0942314	3.00645e+06	0.0864225	6.33197e+06	0.0779666	1.92816e+06
213-122	0.11155	1.71866e+06	0.0718872	2.29006e+06	0.112208	1.93932e+06	0.0671887	1.66789e+06	0.102176	5.82609e+06	0.100381	1.27979e+06	0.103551	2.14734e+06	0.0983979	4.30466e+06	0.0853404	1.98001e+06
213-123	0.0880653	2.14893e+06	0.0631147	1.78823e+06	0.102973	2.57648e+06	0.0369473	2.81426e+06	0.0966302	8.33935e+06	0.104255	1.84401e+06	0.100283	2.75303e+06	0.0914242	5.72435e+06	0.067851	1.40451e+06
213-124	0.10123	1.92692e+06	0.0778032	2.01594e+06	0.119168	1.42892e+06	0.0607535	1.64687e+06	0.0990296	6.0681e+06	0.108741	1.14682e+06	0.123214	1.62043e+06	0.0910993	4.34097e+06	0.0861674	1.6659e+06
213-126	0.0921557	1.93037e+06	0.0697892	1.54517e+06	0.109506	1.52109e+06	0.0648526	1.35415e+06	0.0891687	7.46054e+06	0.110732	1.62063e+06	0.102068	1.36585e+06	0.0893472	4.79025e+06	0.0783234	1.19732e+06
213-127	0.112955	1.86021e+06	0.0645158	1.72164e+06	0.119579	1.84467e+06	0.050304	1.4221e+06	0.108584	5.98922e+06	0.112081	1.42855e+06	0.110026	2.11064e+06	0.0947991	3.80066e+06	0.0723595	1.26495e+06
213-128	0.100624	2.39206e+06	0.0646414	1.78735e+06	0.110657	2.04832e+06	0.0388928	1.93764e+06	0.0938824	6.56812e+06	0.102456	1.33607e+06	0.111787	2.18148e+06	0.0914568	4.46291e+06	0.0772346	1.43912e+06
213-129	0.100924	1.66124e+06	0.083749	1.83071e+06	0.127573	893663	0.0651002	1.26796e+06	0.108259	5.95659e+06	0.121419	1.06915e+06	0.133047	1.36535e+06	0.0958194	3.66435e+06	0.090156	1.42309e+06
213-13	0.103998	1.48536e+06	0.0637251	1.43731e+06	0.131911	1.37297e+06	0.060931	1.53353e+06	0.1122	5.67365e+06	0.109173	1.2904e+06	0.104256	1.47648e+06	0.106761	3.57607e+06	0.072124	1.3914e+06
213-130	0.0954974	2.98213e+06	0.0665642	2.32154e+06	0.103084	2.55119e+06	0.0619976	1.91915e+06	0.0940943	8.3933e+06	0.0949751	1.5449e+06	0.0968473	2.85609e+06	0.0882969	5.7738e+06	0.0833734	2.55334e+06
213-131	0.105322	2.07563e+06	0.0710362	1.54756e+06	0.11714	1.70648e+06	0.0466052	1.82274e+06	0.106756	5.86258e+06	0.104316	1.04226e+06	0.114372	1.8137e+06	0.0977615	3.93338e+06	0.0729036	1.19286e+06
213-132	0.0987234	3.50204e+06	0.0680437	2.47562e+06	0.103102	2.62885e+06	0.0562507	1.96153e+06	0.096112	8.75906e+06	0.102576	1.83654e+06	0.104302	2.98253e+06	0.0898663	6.92726e+06	0.0766999	2.07232e+06
213-133	0.0989854	1.48643e+06	0.0740947	2.30115e+06	0.123431	1.85198e+06	0.0614686	1.58287e+06	0.101979	6.13183e+06	0.116668	1.40146e+06	0.117295	1.28798e+06	0.0968616	4.06654e+06	0.0720837	1.28258e+06
213-14	0.0851353	3.11224e+06	0.0694246	3.59918e+06	0.114793	2.76495e+06	0.0557155	1.91931e+06	0.0963943	8.87547e+06	0.0978695	2.26879e+06	0.0924919	2.56934e+06	0.0949956	7.46221e+06	0.0681165	2.01192e+06
213-15	0.0980529	1.78219e+06	0.0749376	1.7443e+06	0.129317	1.42499e+06	0.0532496	1.26763e+06	0.0977161	5.58142e+06	0.11469	1.13481e+06	0.111401	1.13063e+06	0.0955088	4.20473e+06	0.0835628	1.55484e+06
213-16	0.0904567	3.00676e+06	0.0668831	1.96621e+06	0.116934	2.3634e+06	0.0541933	1.46826e+06	0.0982057	8.35452e+06	0.102025	1.5709e+06	0.100908	2.60042e+06	0.0948284	6.35579e+06	0.0799769	1.85583e+06
213-17	0.106201	1.82713e+06	0.0701861	2.03135e+06	0.129701	1.77186e+06	0.0541982	1.44049e+06	0.103674	6.33851e+06	0.0980755	1.19171e+06	0.108077	2.3015e+06	0.101153	4.06579e+06	0.0739228	1.74218e+06
213-18	0.0959935	2.18088e+06	0.0674826	1.96149e+06	0.1201	2.09335e+06	0.0520774	1.97318e+06	0.0944746	7.55305e+06	0.0953423	1.52456e+06	0.0992666	2.78148e+06	0.0960157	4.49881e+06	0.072861	1.84079e+06
213-19	0.101008	1.7559e+06	0.0628706	1.32001e+06	0.132036	1.40587e+06	0.057427	1.46189e+06	0.102276	5.35349e+06	0.112225	1.0949e+06	0.114097	1.18098e+06	0.0963729	3.82335e+06	0.0793218	1.45615e+06
213-21	0.0954255	2.49551e+06	0.0697921	1.13304e+06	0.124303	1.43456e+06	0.0467761	1.04605e+06	0.0927253	5.71187e+06	0.109505	1.36886e+06	0.105834	1.16746e+06	0.0918527	4.48597e+06	0.0706705	854338
213-22	0.101503	2.25963e+06	0.063127	1.5987e+06	0.1347	1.66032e+06	0.0531503	1.93028e+06	0.113133	6.2854e+06	0.104088	1.28158e+06	0.11354	2.23979e+06	0.0988757	3.51374e+06	0.0758597	1.70892e+06
213-24	0.0874691	1.79642e+06	0.0627253	1.06733e+06	0.113836	2.27949e+06	0.0507106	1.53049e+06	0.0989418	7.96323e+06	0.0995196	1.45078e+06	0.100784	2.44687e+06	0.0896784	4.88399e+06	0.0762004	1.40222e+06
213-25	0.0967543	1.83963e+06	0.0596228	1.57776e+06	0.127468	1.71106e+06	0.0526238	1.25776e+06	0.102584	6.26653e+06	0.11095	1.51516e+06	0.101103	1.62527e+06	0.0955982	3.91492e+06	0.0665538	1.40989e+06
213-26	0.0845832	3.13718e+06	0.0726926	2.57504e+06	0.113517	2.36021e+06	0.052768	1.6779e+06	0.100802	9.10616e+06	0.100305	1.58106e+06	0.100747	2.83454e+06	0.0942882	6.78777e+06	0.0720641	1.68895e+06
213-27	0.0952428	2.24976e+06	0.0656398	2.03831e+06	0.129721	1.76877e+06	0.0635259	1.61766e+06	0.106222	6.48496e+06	0.106258	1.56985e+06	0.108095	2.39712e+06	0.100782	4.42588e+06	0.0794358	1.9829e+06
213-28	0.0902139	2.93467e+06	0.0811218	2.515e+06	0.119983	2.06485e+06	0.0692858	1.45537e+06	0.101132	8.39408e+06	0.105239	1.85371e+06	0.0973566	2.71426e+06	0.0877835	6.71767e+06	0.118021	1.13547e+06
213-29	0.0930285	2.18046e+06	0.0809488	2.08899e+06	0.128973	1.32366e+06	0.0562271	918370	0.0960923	5.75014e+06	0.108438	1.00667e+06	0.111614	1.93451e+06	0.0884372	3.97896e+06	0.110999	1.17705e+06
213-3	0.088586	3.33106e+06	0.0689155	2.0351e+06	0.119398	2.31985e+06	0.0616598	1.78971e+06	0.0966493	8.67511e+06	0.0977418	1.824e+06	0.0937343	3.22164e+06	0.0925649	5.7247e+06	0.0798956	2.23659e+06
213-30	0.0921436	2.82589e+06	0.0771848	2.1649e+06	0.122751	2.17654e+06	0.0429797	1.29421e+06	0.0951627	7.74401e+06	0.103792	1.70282e+06	0.0961718	2.05944e+06	0.0983434	5.41141e+06	0.094594	998179
213-32	0.102153	1.83374e+06	0.0771989	1.87838e+06	0.13295	1.55352e+06	0.0530706	1.54509e+06	0.104473	5.24545e+06	0.110274	1.33749e+06	0.105405	1.57278e+06	0.0936336	3.88652e+06	0.115884	1.39057e+06
213-33	0.0979637	1.70615e+06	0.0716694	2.07187e+06	0.122447	1.88914e+06	0.0470769	1.69077e+06	0.0979577	6.62589e+06	0.10354	1.5846e+06	0.100447	2.50519e+06	0.100353	4.27844e+06	0.103134	1.03236e+06
213-34	0.0965072	2.20881e+06	0.0754911	2.19734e+06	0.131176	1.57748e+06	0.0604035	1.35099e+06	0.109633	6.05092e+06	0.105539	1.24339e+06	0.111218	2.23936e+06	0.0986388	3.91742e+06	0.118438	1.47425e+06
213-35	0.0906521	2.24287e+06	0.0798548	2.51858e+06	0.130755	1.76175e+06	0.0684409	1.51636e+06	0.106424	6.19196e+06	0.105917	1.44216e+06	0.102468	1.73815e+06	0.097629	4.33919e+06	0.106699	1.26568e+06
213-36	0.105948	1.96163e+06	0.073741	1.89196e+06	0.136798	1.44491e+06	0.0693824	1.41681e+06	0.120111	5.67588e+06	0.111942	1.25862e+06	0.116393	2.09778e+06	0.104342	3.39389e+06	0.105393	1.15777e+06
213-37	0.0877839	2.32202e+06	0.0738048	2.1793e+06	0.115729	2.39261e+06	0.052264	1.83906e+06	0.0989422	8.3219e+06	0.0974365	1.75017e+06	0.0961681	3.0674e+06	0.0996378	5.19555e+06	0.114652	1.56117e+06
213-38	0.092387	1.73246e+06	0.0730547	1.59918e+06	0.130801	1.37301e+06	0.0508661	1.74442e+06	0.101674	5.59236e+06	0.108488	1.06333e+06	0.111693	1.88213e+06	0.0933167	3.88364e+06	0.121059	1.15119e+06
213-39	0.0908425	4.15284e+06	0.0822603	4.62334e+06	0.121106	2.31378e+06	0.0689	1.82644e+06	0.102637	8.67198e+06	0.106903	1.76621e+06	0.0997673	2.19918e+06	0.0948257	7.02637e+06	0.119367	1.85694e+06
213-4	0.0931804	1.87028e+06	0.0735186	2.58349e+06	0.133729	1.50308e+06	0.0596985	1.63706e+06	0.101304	6.3083e+06	0.109224	1.37968e+06	0.103834	1.59006e+06	0.097531	4.4525e+06	0.0827714	2.0085e+06
213-40	0.0991529	1.21172e+06	0.0718663	1.32553e+06	0.136068	1.05523e+06	0.0560197	1.42423e+06	0.108668	5.36973e+06	0.115417	890875	0.116156	1.7339e+06	0.0927219	3.10318e+06	0.117239	550205
213-41	0.0864755	2.18019e+06	0.0715285	1.86857e+06	0.117364	1.95627e+06	0.0467648	598542	0.0920317	7.62271e+06	0.0967992	1.04815e+06	0.102241	2.36508e+06	0.0964019	5.68948e+06	0.105766	598528
213-42	0.104184	1.99788e+06	0.0700552	2.24726e+06	0.126337	1.59066e+06	0.0658362	1.6003e+06	0.102508	5.95795e+06	0.105834	1.38939e+06	0.109401	1.95109e+06	0.0954262	3.97e+06	0.11318	1.30802e+06
213-43	0.0884224	1.96484e+06	0.0650052	2.25107e+06	0.114838	2.38309e+06	0.0464135	2.45067e+06	0.0990708	8.29589e+06	0.0975972	1.85918e+06	0.0997677	2.74212e+06	0.0965742	5.94246e+06	0.0983793	1.1013e+06
213-44	0.0968028	1.67648e+06	0.0630102	2.27058e+06	0.130662	1.75559e+06	0.0516233	1.41712e+06	0.102537	5.92848e+06	0.106282	1.52434e+06	0.111365	2.11141e+06	0.096784	4.14318e+06	0.117287	1.47597e+06
213-46	0.105205	1.7698e+06	0.0642445	1.71954e+06	0.123805	1.87312e+06	0.0533289	1.46622e+06	0.106434	6.16475e+06	0.104379	1.62655e+06	0.106828	2.19699e+06	0.0981401	3.91796e+06	0.100998	795339
213-5	0.0906164	1.88384e+06	0.0629405	1.99148e+06	0.117453	1.54347e+06	0.0662787	1.83549e+06	0.0950927	6.90116e+06	0.098496	1.59211e+06	0.096053	2.63295e+06	0.095113	4.37756e+06	0.0740049	1.4621e+06
213-51	0.0958376	2.35969e+06	0.0657408	1.60194e+06	0.120462	2.0246e+06	0.0551303	1.13181e+06	0.095586	8.42662e+06	0.107327	1.22282e+06	0.103242	1.81906e+06	0.0884521	6.24067e+06	0.117552	885670
213-52	0.104251	2.29891e+06	0.0727448	2.1372e+06	0.132156	1.21358e+06	0.074373	1.43689e+06	0.10306	5.62243e+06	0.102452	1.00937e+06	0.116081	1.63072e+06	0.105783	4.10494e+06	0.109035	767738
213-53	0.0853447	2.06633e+06	0.0735153	2.80197e+06	0.102253	2.05995e+06	0.0769642	1.27903e+06	0.0933513	8.36928e+06	0.0988354	1.2715e+06	0.0982808	2.85305e+06	0.0869675	6.90845e+06	0.0883814	1.2502e+06
213-55	0.089591	3.01731e+06	0.0678155	2.31658e+06	0.101962	2.54146e+06	0.0498335	1.73442e+06	0.0959153	8.27386e+06	0.101172	2.04111e+06	0.0964149	3.20777e+06	0.0959247	5.58055e+06	0.0827754	1.61376e+06
213-56	0.102361	1.45108e+06	0.0700832	1.75982e+06	0.112968	1.75621e+06	0.0640583	1.69891e+06	0.106098	5.50743e+06	0.105699	1.5033e+06	0.104415	1.73319e+06	0.097784	3.64409e+06	0.0904268	1.66296e+06
213-57	0.095044	2.0194e+06	0.0720632	1.80512e+06	0.107603	1.99811e+06	0.0613519	1.66348e+06	0.0913344	6.74064e+06	0.104082	1.88599e+06	0.0976447	1.88935e+06	0.0902937	4.33135e+06	0.0873564	1.52079e+06
213-59	0.0943081	1.87376e+06	0.0792506	1.91962e+06	0.110061	1.45415e+06	0.0685727	1.39762e+06	0.0988889	5.75864e+06	0.107627	1.1472e+06	0.107427	1.94804e+06	0.0963091	4.16725e+06	0.0924763	1.3992e+06
213-6	0.0974369	1.93222e+06	0.0657676	1.78258e+06	0.139221	1.68551e+06	0.0566421	1.60096e+06	0.112341	5.56635e+06	0.109271	1.4259e+06	0.107016	2.08156e+06	0.106061	3.70671e+06	0.0773134	1.46527e+06
213-60	0.104729	1.79435e+06	0.0793139	1.66807e+06	0.126619	1.18443e+06	0.0772684	1.26576e+06	0.111367	4.98829e+06	0.116868	903199	0.126204	1.47097e+06	0.101209	3.60359e+06	0.0913176	1.45032e+06
213-61	0.0925052	3.18951e+06	0.0729806	2.57059e+06	0.101152	2.39443e+06	0.0553849	1.81856e+06	0.0915314	8.60097e+06	0.100349	1.85079e+06	0.0962913	2.18354e+06	0.0923467	5.99053e+06	0.0903359	2.21512e+06
213-62	0.098654	1.79524e+06	0.0702204	1.98854e+06	0.116156	1.69202e+06	0.0512151	1.68055e+06	0.104447	5.9438e+06	0.106474	1.38043e+06	0.11284	2.22734e+06	0.0991045	4.27101e+06	0.0841659	1.34971e+06
213-63	0.0847647	2.22805e+06	0.0769371	2.67993e+06	0.106288	1.95207e+06	0.0582319	1.82596e+06	0.0892814	8.35685e+06	0.105078	1.57459e+06	0.102535	2.49507e+06	0.0936122	6.26102e+06	0.0786684	1.2365e+06
213-64	0.0985131	1.21687e+06	0.0755266	1.6709e+06	0.120074	1.04323e+06	0.0508655	1.14786e+06	0.104424	5.24033e+06	0.114801	938106	0.119329	1.54262e+06	0.0929069	3.78014e+06	0.0821152	932989
213-65	0.0885049	1.96392e+06	0.0704537	2.40314e+06	0.0996067	2.17499e+06	0.0478366	1.93001e+06	0.102238	8.04176e+06	0.100748	1.54308e+06	0.0980964	2.73075e+06	0.0918181	6.15843e+06	0.0836969	1.79967e+06
213-66	0.0989217	1.68426e+06	0.0697048	2.12108e+06	0.11368	1.84956e+06	0.0614697	1.47123e+06	0.104677	6.0997e+06	0.102013	1.29241e+06	0.108363	2.46684e+06	0.0992249	4.45732e+06	0.0855454	1.35241e+06
213-67	0.0948996	1.99234e+06	0.0772013	2.40541e+06	0.106699	1.85424e+06	0.0755626	1.56287e+06	0.0921629	7.63695e+06	0.10174	1.51204e+06	0.100269	2.57598e+06	0.0929636	5.80638e+06	0.0866958	1.63814e+06
213-68	0.0944324	1.86933e+06	0.0718958	1.22418e+06	0.119113	927379	0.0539945	1.66464e+06	0.104997	5.25992e+06	0.109469	931032	0.114358	1.70524e+06	0.0919152	3.71929e+06	0.0887639	755579
213-69	0.090864	2.14265e+06	0.0684646	1.8669e+06	0.109233	1.88811e+06	0.0655773	1.33932e+06	0.099849	6.52303e+06	0.1061	1.30255e+06	0.103523	1.7755e+06	0.0906106	4.25816e+06	0.085294	1.30601e+06
213-7	0.100062	1.89456e+06	0.0737801	2.54416e+06	0.125047	1.63688e+06	0.0561578	1.45078e+06	0.1005	6.27407e+06	0.0986299	1.38064e+06	0.102285	2.16689e+06	0.099479	4.3847e+06	0.0664047	1.27806e+06
213-70	0.099843	1.83548e+06	0.0868693	1.94283e+06	0.121497	1.23774e+06	0.0606329	1.33038e+06	0.100608	5.39609e+06	0.112971	990175	0.113016	1.27981e+06	0.0952838	4.36389e+06	0.099874	1.32071e+06
213-71	0.0959127	2.88454e+06	0.0713054	2.4528e+06	0.111476	2.04752e+06	0.0613387	1.65337e+06	0.0986045	6.83799e+06	0.105285	1.39048e+06	0.102141	1.91303e+06	0.0971175	5.5852e+06	0.0904403	2.07265e+06
213-72	0.106574	2.31219e+06	0.0700095	1.84453e+06	0.124491	1.6234e+06	0.0720156	1.73087e+06	0.11346	5.65629e+06	0.111333	1.58832e+06	0.114268	2.21119e+06	0.104201	4.04559e+06	0.0805199	1.30182e+06
213-73	0.0935594	2.58231e+06	0.063173	2.01958e+06	0.102043	2.62351e+06	0.0540283	2.0616e+06	0.0978493	8.22182e+06	0.10153	2.03759e+06	0.0933648	2.28008e+06	0.0885802	6.21924e+06	0.0774835	1.18015e+06
213-74	0.0991597	1.79811e+06	0.0688188	2.11573e+06	0.114484	1.82935e+06	0.0549863	1.61694e+06	0.107181	6.09186e+06	0.10682	1.39092e+06	0.107296	2.31663e+06	0.104476	4.36352e+06	0.0823688	1.60292e+06
213-75	0.0895972	3.60963e+06	0.0706772	2.05902e+06	0.104382	2.13856e+06	0.0656038	1.56918e+06	0.0952164	8.55158e+06	0.103495	1.72393e+06	0.101665	2.73698e+06	0.0916862	6.78962e+06	0.0929241	1.92865e+06
213-77	0.102093	2.89202e+06	0.0702159	2.44226e+06	0.101029	2.68241e+06	0.0561738	1.79936e+06	0.0924682	8.48304e+06	0.113304	1.68998e+06	0.0899136	2.33992e+06	0.0872741	6.2651e+06	0.0738193	1.97642e+06
213-78	0.115102	1.76655e+06	0.072519	1.65678e+06	0.111584	1.74614e+06	0.0524356	1.59715e+06	0.11006	5.18595e+06	0.118372	1.27589e+06	0.105493	2.0311e+06	0.0994307	3.74837e+06	0.0850332	1.70871e+06
213-8	0.10057	1.51614e+06	0.0719567	1.4217e+06	0.150554	1.18732e+06	0.0593217	1.28221e+06	0.107792	5.2184e+06	0.12225	1.07933e+06	0.119475	1.10601e+06	0.093615	4.30281e+06	0.0731208	884147
213-80	0.0990037	1.75808e+06	0.0764324	2.04856e+06	0.118003	1.97322e+06	0.0682716	1.69289e+06	0.110766	5.20768e+06	0.122066	1.4165e+06	0.10891	2.16958e+06	0.102652	3.77407e+06	0.086482	1.88889e+06
213-81	0.0966567	2.12861e+06	0.0804853	2.30153e+06	0.109065	1.68264e+06	0.0630423	1.20837e+06	0.103621	5.55128e+06	0.121491	1.27984e+06	0.101739	1.47702e+06	0.100466	4.1402e+06	0.0873214	1.80668e+06
213-82	0.112852	1.85943e+06	0.0826085	2.33221e+06	0.121886	1.66329e+06	0.0607559	1.48743e+06	0.10892	5.57485e+06	0.114025	1.04111e+06	0.112454	1.98343e+06	0.101394	3.9898e+06	0.0762335	1.38612e+06
213-83	0.101408	2.12198e+06	0.0797546	2.53586e+06	0.110067	2.1489e+06	0.0607518	1.62702e+06	0.101665	5.30412e+06	0.108378	1.24189e+06	0.101826	2.45463e+06	0.0961127	4.3738e+06	0.0807627	1.66698e+06
213-84	0.105554	1.7999e+06	0.0782584	2.37115e+06	0.127527	1.74655e+06	0.0538878	1.45181e+06	0.113042	5.35323e+06	0.129062	1.27129e+06	0.110598	1.38404e+06	0.104146	3.883e+06	0.0809696	1.89815e+06
213-85	0.0927514	2.66229e+06	0.0688513	1.83453e+06	0.103357	2.12218e+06	0.0550583	1.90196e+06	0.0995185	7.02208e+06	0.113455	1.67335e+06	0.0990039	2.70227e+06	0.0912548	5.41298e+06	0.0778976	1.59606e+06
213-86	0.101245	1.96247e+06	0.077532	2.11422e+06	0.113882	1.63566e+06	0.0599816	1.60002e+06	0.106205	5.3518e+06	0.111355	1.0835e+06	0.107954	1.96349e+06	0.0985668	3.88797e+06	0.0814752	1.76976e+06
213-9	0.0860621	2.51591e+06	0.0575811	1.91521e+06	0.117278	2.19372e+06	0.0514289	1.3907e+06	0.0938176	8.64247e+06	0.102736	1.98546e+06	0.0935893	2.30413e+06	0.0899665	6.04989e+06	0.0682874	1.78432e+06
214-1	0.118751	1.41362e+06	0.0805977	1.40198e+06	0.135638	1.17683e+06	0.0465988	705991	0.075107	2.0454e+06	0.112996	838707	0.114801	1.03731e+06	0.099813	2.99982e+06	0.0833628	1.30442e+06
214-10	0.126131	1.59308e+06	0.0747183	991919	0.152389	940400	0.0415387	1.02781e+06	0.086515	1.7449e+06	0.124145	1.07502e+06	0.128904	1.34821e+06	0.0941954	3.42222e+06	0.082769	846660
214-11	0.107992	1.59232e+06	0.0754324	1.13865e+06	0.15302	1.1819e+06	0.0546274	1.47679e+06	0.0800675	2.09231e+06	0.123447	1.06342e+06	0.123548	1.08079e+06	0.101275	3.43648e+06	0.0868111	1.17922e+06
214-120	0.133451	993545	0.0763589	904425	-1	-1	0.0568389	1.16322e+06	0.104943	3.04559e+06	0.141971	782480	0.137295	1.16769e+06	0.100087	3.30788e+06	0.0851811	879852
214-121	0.113236	1.46918e+06	0.0849883	1.21343e+06	-1	-1	0.0430568	851643	0.0854276	1.85736e+06	0.122467	1.07265e+06	0.123941	1.34363e+06	0.0953936	3.69808e+06	0.0895921	1.12518e+06
214-122	0.123979	1.29445e+06	0.083704	1.53465e+06	0.132071	906349	0.0711455	1.13062e+06	0.0826018	1.81955e+06	0.123276	1.04438e+06	0.129036	1.3013e+06	0.0993758	3.60559e+06	0.0938889	1.55912e+06
214-123	0.120634	958172	0.0697556	877114	0.136974	860973	-1	-1	0.0859247	1.71391e+06	0.131047	972785	0.144101	1.26042e+06	0.103615	3.40125e+06	0.0779445	845875
214-124	0.12256	1.58113e+06	0.0814614	1.63656e+06	0.137359	994876	0.0539694	1.16069e+06	0.106822	4.9895e+06	0.130206	996773	0.138608	1.28194e+06	0.101805	3.45439e+06	0.0981272	1.67617e+06
214-126	0.107809	1.25547e+06	0.0697786	1.13845e+06	-1	-1	0.050427	1.09118e+06	0.0886143	2.37332e+06	0.131014	1.15766e+06	0.12153	1.05475e+06	0.0966068	3.79949e+06	0.085183	904792
214-127	0.123814	1.34594e+06	0.0652339	921769	0.13632	890917	0.042241	1.23543e+06	0.113387	4.43063e+06	0.130159	1.08629e+06	0.132303	1.14987e+06	0.102781	3.35695e+06	0.0795665	867698
214-128	0.119192	1.56251e+06	0.0762638	963602	0.141613	889611	-1	-1	0.0844405	1.6884e+06	0.128368	997975	0.146285	1.24839e+06	0.0985982	3.50214e+06	0.0876682	1.08805e+06
214-129	0.11751	1.52187e+06	0.0894594	1.46192e+06	-1	-1	0.0542186	1.18252e+06	0.0910268	1.67181e+06	0.142925	865729	0.14015	1.15752e+06	0.100669	3.55295e+06	0.0931657	1.19405e+06
214-13	0.140029	868866	0.0721428	820329	0.154918	880341	0.0500273	420660	0.0797162	1.5441e+06	0.131122	707368	0.132007	861546	0.10063	2.72309e+06	0.0779464	812024
214-130	0.120945	1.67139e+06	0.0823826	1.30041e+06	0.131195	960322	0.069277	1.14729e+06	0.0846504	1.66785e+06	0.119727	1.00126e+06	0.130796	1.3166e+06	0.101945	3.43587e+06	0.0990272	1.85334e+06
214-131	0.125576	1.30145e+06	0.0693834	876340	0.143139	811754	0.0457536	748673	0.0850648	1.60872e+06	0.128299	856365	0.13565	1.16465e+06	0.0934794	3.91499e+06	0.083051	831840
214-132	0.119718	1.97847e+06	0.0762661	1.30568e+06	0.132692	763485	0.058826	1.02723e+06	0.0821255	2.25242e+06	0.126708	1.02806e+06	0.140154	1.3563e+06	0.0969456	3.93297e+06	0.0889048	1.18572e+06
214-133	0.113531	1.34857e+06	0.082422	1.63809e+06	0.149866	1.04631e+06	0.0557999	1.0281e+06	0.130276	4.30998e+06	0.140091	1.08446e+06	0.145958	876707	0.121987	3.12859e+06	0.0846212	979432
214-14	0.12337	1.41221e+06	0.0854716	2.32286e+06	0.146843	1.16502e+06	0.0469158	532324	0.0799062	2.76439e+06	0.121259	1.02998e+06	0.12203	970620	0.096881	3.57457e+06	0.0800883	1.11199e+06
214-15	0.122704	1.05319e+06	0.0783361	1.24063e+06	-1	-1	0.0364198	528279	0.0784785	2.0263e+06	0.131415	900609	0.126979	926850	0.0996165	3.18882e+06	0.090532	1.31951e+06
214-16	0.119111	1.46202e+06	0.0758042	1.31512e+06	0.13886	1.18192e+06	0.0490743	562195	0.0738597	1.80613e+06	0.117377	794054	0.126362	1.1562e+06	0.0990175	3.23593e+06	0.0847451	1.33217e+06
214-17	0.133835	1.13549e+06	0.076304	1.04176e+06	0.153804	1.18787e+06	0.0537799	507679	0.0887108	1.75087e+06	0.127085	756444	0.135651	1.28139e+06	0.100872	3.45186e+06	0.0830131	959770
214-18	0.130107	1.39283e+06	0.0746845	1.06269e+06	0.148158	1.18577e+06	0.0483293	514509	0.0853573	2.12352e+06	0.120949	897856	0.127151	1.33091e+06	0.0992945	3.70007e+06	0.0816319	941715
214-19	0.126591	1.30237e+06	0.0667443	939938	-1	-1	0.0528952	554634	0.0764343	1.7801e+06	0.126282	858044	0.126743	1.02037e+06	0.0991715	2.96573e+06	0.0819811	1.19932e+06
214-21	0.120077	1.56072e+06	0.0688826	771621	-1	-1	0.0405222	571807	0.0978632	3.04191e+06	0.130603	1.06247e+06	0.128478	1.02157e+06	0.097306	3.88558e+06	0.0785641	789916
214-22	0.125852	1.44856e+06	0.0653054	841221	0.153376	998238	0.0436188	958311	0.119685	3.98867e+06	0.124793	851457	0.140488	1.31437e+06	0.114665	2.84199e+06	0.0832217	1.19109e+06
214-24	0.115321	907175	0.0594144	706999	0.142109	1.19203e+06	0.0427053	688897	0.0877598	2.1893e+06	0.121286	1.05792e+06	0.123188	1.43727e+06	0.0948372	3.43057e+06	0.0900476	1.48616e+06
214-25	0.113232	1.09181e+06	0.0643756	813697	0.151832	1.11117e+06	0.0458152	690307	0.107132	4.07635e+06	0.133884	1.19922e+06	0.130157	878530	0.0988879	2.97104e+06	0.0751801	676121
214-26	0.111391	1.54984e+06	0.0837296	1.70287e+06	-1	-1	0.0499744	529029	0.0830752	1.88068e+06	0.119669	811714	0.124929	1.127e+06	0.100804	3.47391e+06	0.0807544	1.07746e+06
214-27	0.12534	1.41471e+06	0.0738631	1.01065e+06	-1	-1	0.0701461	911307	0.104845	3.96149e+06	0.13361	1.04264e+06	0.137227	1.24661e+06	0.101439	3.43932e+06	0.0935289	1.20546e+06
214-28	0.106473	1.80499e+06	0.0879553	1.83679e+06	-1	-1	0.0641683	1.01887e+06	0.0981319	3.86045e+06	0.1264	1.07358e+06	0.121053	1.44608e+06	0.0997479	3.74806e+06	0.127969	824545
214-29	0.109491	1.63835e+06	0.0840106	1.51302e+06	-1	-1	0.0519031	783165	0.0810167	2.03758e+06	0.131494	873573	0.13225	1.43881e+06	0.0944453	3.15658e+06	0.115724	675175
214-3	0.107951	1.72271e+06	0.0779787	907222	0.151122	1.08305e+06	0.0612232	641672	0.0819206	1.91148e+06	0.121688	971390	0.12358	1.36767e+06	0.101061	3.36931e+06	0.0908619	1.24144e+06
214-30	0.114114	1.15866e+06	0.0870017	1.46287e+06	0.150493	974232	0.0521182	347656	0.0789567	1.60785e+06	0.121917	793782	0.123384	1.074e+06	0.102371	2.83596e+06	0.106511	622723
214-32	0.128135	1.30979e+06	0.0800143	1.11076e+06	0.159247	1.04385e+06	0.0558864	1.08477e+06	0.106557	2.9762e+06	0.131459	835723	0.133979	1.00528e+06	0.109348	3.04223e+06	0.118168	811978
214-33	0.130375	1.04992e+06	0.0788662	987402	0.1496	1.08567e+06	0.0450084	1.54619e+06	0.082921	1.80711e+06	0.127002	892095	0.126853	1.33664e+06	0.100522	3.00743e+06	0.1168	521100
214-34	0.10762	1.70328e+06	0.0882708	1.42534e+06	-1	-1	0.0515935	610382	0.0946926	1.89243e+06	0.125839	925181	0.130266	1.45986e+06	0.10717	3.34603e+06	0.121533	819273
214-35	0.113998	1.1294e+06	0.0928174	1.59215e+06	0.162323	944769	0.0603577	993381	0.0835968	1.60382e+06	0.134409	923889	0.130677	1.04236e+06	0.0997612	3.00403e+06	0.117199	716404
214-36	0.130976	1.24537e+06	0.0773602	1.16869e+06	0.152747	847145	0.0515748	1.43039e+06	0.0802519	1.45781e+06	0.130293	792196	0.139583	1.27724e+06	0.111178	2.95857e+06	0.110472	777694
214-37	0.124774	1.27822e+06	0.079637	1.1333e+06	0.147482	925004	0.0482954	1.61757e+06	0.0889272	1.51673e+06	0.117755	752501	0.128832	1.3991e+06	0.109211	2.82538e+06	0.119526	920959
214-38	0.111309	1.39805e+06	0.0738835	1.13911e+06	-1	-1	0.0500016	1.59428e+06	0.0867247	1.48917e+06	0.13138	1.06762e+06	0.131504	1.4971e+06	0.101466	3.07227e+06	0.118212	884829
214-39	0.108975	1.8663e+06	0.102826	3.11035e+06	0.150117	861956	0.0529767	607179	0.0796839	1.93161e+06	0.116077	681539	0.126189	928425	0.10052	3.26945e+06	0.121622	1.35825e+06
214-4	0.108863	1.19129e+06	0.0854796	1.79215e+06	0.156578	961969	0.0477772	849189	0.108354	4.55697e+06	0.125803	781237	0.128963	853001	0.102446	3.13023e+06	0.0868554	1.37298e+06
214-40	0.127389	989502	0.0769634	1.00533e+06	-1	-1	0.0569687	780616	0.0879133	1.55566e+06	0.133538	1.14723e+06	0.135977	1.40819e+06	0.0968656	3.03579e+06	0.11826	625923
214-41	0.112707	1.04516e+06	0.0751202	1.33076e+06	0.149181	707201	0.0506699	369456	0.0818195	1.76915e+06	0.120975	831555	0.128522	1.27092e+06	0.0967496	3.25358e+06	0.11697	567471
214-42	0.121666	858294	0.0807121	1.20969e+06	0.157011	676356	0.0739152	925253	0.0855715	1.59716e+06	0.125746	860855	0.132361	1.15699e+06	0.0948402	3.60019e+06	0.118034	886336
214-43	0.142197	856575	0.0859071	1.23122e+06	0.148627	771297	0.0513661	384478	0.0844765	1.43798e+06	0.125302	654721	0.125537	971021	0.101062	2.80953e+06	0.109321	833451
214-44	0.11681	1.30702e+06	0.072708	1.4622e+06	-1	-1	0.0445916	1.64271e+06	0.0836386	1.86919e+06	0.122165	978545	0.134427	1.35376e+06	0.107845	3.40704e+06	0.122846	1.39657e+06
214-46	0.12847	913685	0.0676557	884040	0.154809	777506	0.0461739	636445	0.0827402	1.7156e+06	0.130919	719056	0.130241	1.33223e+06	0.0978634	3.41301e+06	0.114319	488691
214-5	0.117217	1.1527e+06	0.0676859	1.00067e+06	-1	-1	0.0645299	922991	0.0801428	1.78883e+06	0.120363	864961	0.123312	1.32408e+06	0.100583	3.31889e+06	0.0779192	838570
214-51	0.122514	1.09906e+06	0.0688421	1.16914e+06	-1	-1	0.0568882	491690	0.102181	4.24663e+06	0.126892	1.02529e+06	0.127076	1.00738e+06	0.0961811	3.73572e+06	0.12412	759494
214-52	0.13251	1.55577e+06	0.0834556	1.88578e+06	-1	-1	0.0641701	837014	0.0800025	1.70907e+06	0.124801	603338	0.136984	941674	0.0991669	3.07182e+06	0.109812	717449
214-53	0.111324	1.16867e+06	0.0809532	1.51539e+06	-1	-1	0.0639837	576610	0.110926	4.38317e+06	0.121341	1.11708e+06	0.124474	1.54482e+06	0.103287	3.47095e+06	0.0842133	960174
214-55	0.121784	1.34908e+06	0.0828258	1.12068e+06	0.131948	912491	0.0444076	531263	0.0852739	1.45998e+06	0.130551	803232	0.134133	1.23621e+06	0.0985431	2.83183e+06	0.0893659	757062
214-56	0.130061	1.06686e+06	0.0821143	745337	0.133617	1.08484e+06	0.0652777	968234	0.0889153	1.65038e+06	0.132516	812290	0.130943	967296	0.10445	2.77006e+06	0.0931941	918115
214-57	0.116766	1.13299e+06	0.0821286	844939	0.135113	987605	0.0543223	999669	0.0886102	1.4177e+06	0.130988	1.09515e+06	0.128432	859830	0.0975153	3.37396e+06	0.0928878	948140
214-59	0.127131	1.63952e+06	0.0935833	1.19261e+06	-1	-1	0.0730159	1.02238e+06	0.0983172	1.62832e+06	0.13015	1.19379e+06	0.131742	1.26958e+06	0.105856	3.42052e+06	0.0906798	1.03642e+06
214-6	0.13394	1.1388e+06	0.0749534	980875	0.148858	906413	0.0424803	601338	0.0828624	1.395e+06	0.117724	747718	0.125387	1.09088e+06	0.11023	2.57915e+06	0.0819661	1.04341e+06
214-60	0.123368	1.53269e+06	0.0974931	1.31218e+06	-1	-1	0.0838876	915243	0.0938279	1.49545e+06	0.134831	841439	0.138308	1.22019e+06	0.109657	3.40271e+06	0.103469	1.39927e+06
214-61	0.118417	1.54671e+06	0.0823806	1.2387e+06	-1	-1	0.0478325	776677	0.103009	3.98849e+06	0.127223	912143	0.126882	905921	0.0979316	3.43006e+06	0.0989201	1.20792e+06
214-62	0.118067	1.10373e+06	0.0870679	1.2563e+06	0.134405	944709	0.0406611	552304	0.0870698	1.62216e+06	0.126343	970848	0.138291	1.1906e+06	0.10194	3.52252e+06	0.094664	884635
214-63	0.120614	1.08423e+06	0.0917604	1.76084e+06	-1	-1	0.0442391	445900	0.0818999	1.80452e+06	0.126416	868863	0.128988	1.04197e+06	0.102585	3.01128e+06	0.0900378	735021
214-64	0.123356	985126	0.0819671	903447	-1	-1	0.0411908	481865	0.0929359	1.80789e+06	0.134992	993211	0.141163	1.27364e+06	0.0999882	3.36285e+06	0.0901716	831485
214-65	0.131205	1.12608e+06	0.0812892	1.28214e+06	-1	-1	0.0444783	659882	0.0821984	1.9566e+06	0.11321	909910	0.115897	1.17446e+06	0.101884	2.96679e+06	0.092699	1.01763e+06
214-66	0.121739	1.19402e+06	0.0834261	1.08356e+06	0.134682	1.11028e+06	0.05309	1.18085e+06	0.0974997	1.75816e+06	0.127112	1.03135e+06	0.131565	1.38845e+06	0.109567	3.1952e+06	0.09193	915698
214-67	0.121719	1.63715e+06	0.0885584	1.49712e+06	0.133574	1.02807e+06	0.0562358	1.02495e+06	0.0953009	1.71405e+06	0.125101	946880	0.129213	1.31618e+06	0.102065	3.47796e+06	0.0952744	1.17569e+06
214-68	0.118094	1.46632e+06	0.0751925	877221	-1	-1	0.0469316	1.23866e+06	0.0884923	1.91138e+06	0.127558	1.01652e+06	0.138529	1.30015e+06	0.099843	3.47987e+06	0.0948785	835332
214-69	0.116058	1.59325e+06	0.0797231	1.33226e+06	-1	-1	0.0561418	972560	0.0941933	1.82636e+06	0.125409	1.05961e+06	0.123849	1.15442e+06	0.110937	3.08989e+06	0.0931595	1.1709e+06
214-7	0.127947	1.08232e+06	0.0903782	1.77386e+06	0.14449	964674	0.0475596	525809	0.0794785	1.57832e+06	0.110442	595473	0.127837	995151	0.107315	2.70297e+06	0.0719202	648781
214-70	0.116342	1.70183e+06	0.0906222	1.67836e+06	-1	-1	0.0568165	1.07412e+06	0.0873795	1.86286e+06	0.124739	886465	0.129165	1.12802e+06	0.0982538	3.77215e+06	0.101141	1.1122e+06
214-71	0.12327	1.73543e+06	0.0825211	1.52977e+06	0.139129	1.16675e+06	0.0501945	1.61055e+06	0.130614	4.46678e+06	0.126774	901199	0.131449	1.12958e+06	0.123098	3.4005e+06	0.0989788	1.563e+06
214-72	0.121442	1.50988e+06	0.0843908	1.07005e+06	0.143092	918602	0.0513253	958081	0.089713	1.69657e+06	0.12323	921499	0.136338	1.06057e+06	0.111584	2.77936e+06	0.0850212	883895
214-73	0.111593	1.16121e+06	0.0709193	893229	0.135292	1.00035e+06	0.0519886	999580	0.104273	3.46651e+06	0.13026	1.20842e+06	0.126998	1.01751e+06	0.100546	3.44774e+06	0.0883932	706928
214-74	0.122739	1.26208e+06	0.079995	1.06831e+06	0.13449	980411	0.0516722	1.3252e+06	0.10914	4.80965e+06	0.127317	972169	0.129405	1.33515e+06	0.101685	3.58535e+06	0.0949135	1.05531e+06
214-75	0.107602	2.1331e+06	0.0774895	1.21388e+06	-1	-1	0.0490302	1.28617e+06	0.103606	1.60275e+06	0.129564	1.00442e+06	0.13038	1.38607e+06	0.109862	3.62069e+06	0.102772	1.42579e+06
214-77	0.127303	1.45567e+06	0.0826005	1.38746e+06	0.132472	1.07499e+06	-1	-1	0.0980094	3.58501e+06	0.135946	1.09055e+06	0.119784	1.13235e+06	0.0953744	3.70472e+06	0.0778425	877243
214-78	0.138003	998578	0.0856855	1.09889e+06	-1	-1	0.0408174	537421	0.0760998	1.92866e+06	0.1329	895392	0.125769	998970	0.0996401	2.83764e+06	0.0722797	910067
214-8	0.121426	1.24741e+06	0.0774833	1.2143e+06	-1	-1	0.0580735	552760	0.102403	1.20465e+06	0.140679	1.25382e+06	0.135592	1.01948e+06	0.109575	3.45734e+06	0.0822421	948490
214-80	0.118725	1.4818e+06	0.0833054	1.35125e+06	0.138196	1.00499e+06	0.0714946	961032	0.0906131	1.69185e+06	0.144354	1.11224e+06	0.135042	1.26016e+06	0.118205	3.10991e+06	0.0958399	1.56046e+06
214-81	0.126118	1.18634e+06	0.0927785	1.89338e+06	-1	-1	0.0475764	348255	0.0819118	1.91745e+06	0.139424	1.03187e+06	0.12282	895690	0.102193	2.88129e+06	0.0851959	1.108e+06
214-82	0.135922	1.07898e+06	0.0928008	1.58315e+06	0.13531	893887	0.0437271	714962	0.0820533	1.51603e+06	0.133814	786687	0.129228	1.03177e+06	0.104803	2.9533e+06	0.0746854	681685
214-83	0.119491	1.76171e+06	0.0917868	1.54816e+06	-1	-1	0.0538657	1.38746e+06	0.102549	3.46468e+06	0.134081	1.00315e+06	0.130628	1.27142e+06	0.106177	3.34916e+06	0.0857408	1.30699e+06
214-84	0.115426	1.33256e+06	0.0890372	1.77806e+06	0.146141	1.13675e+06	0.0537875	704858	0.10551	1.73007e+06	0.151785	1.02768e+06	0.134102	917791	0.122708	2.98884e+06	0.0802429	962567
214-85	0.115144	1.59335e+06	0.0737187	1.11497e+06	0.128715	952023	0.0460298	736614	0.081722	1.55184e+06	0.1372	1.10949e+06	0.124956	1.34524e+06	0.0968946	3.3463e+06	0.0862379	1.04722e+06
214-86	0.123694	1.39483e+06	0.0923015	1.40859e+06	-1	-1	0.0527505	505925	0.0867827	1.42013e+06	0.136205	914103	0.129704	1.1262e+06	0.105986	2.79035e+06	0.0751835	758300
214-9	0.10705	928420	0.0677342	920291	0.146796	1.01836e+06	-1	-1	0.0807894	1.60374e+06	0.123321	921007	0.121632	932200	0.094032	3.10549e+06	0.0745389	747935
215-1	0.109672	1.93232e+06	0.0725211	1.46259e+06	0.142963	1.4086e+06	0.0652511	1.63326e+06	0.114035	5.37472e+06	0.111426	957146	0.118713	1.25721e+06	0.104632	3.61494e+06	0.0902558	1.47048e+06
215-10	0.126842	1.68995e+06	0.0715742	1.30639e+06	0.152553	1.24078e+06	0.055614	1.1531e+06	0.116535	4.40719e+06	0.12177	888346	0.130479	1.1509e+06	0.106463	3.36786e+06	0.0880469	1.25993e+06
215-11	0.106217	1.94275e+06	0.0730105	1.33473e+06	0.154759	1.46826e+06	0.0754663	1.62007e+06	0.122668	4.65575e+06	0.125365	1.0364e+06	0.128921	1.19138e+06	0.106014	3.19854e+06	0.0994556	1.396e+06
215-120	0.140348	944223	0.0701329	636810	-1	-1	0.0527415	1.14442e+06	0.10898	3.54863e+06	0.133304	631637	0.143158	787963	0.106132	2.79519e+06	0.072734	758372
215-121	0.114799	1.90982e+06	0.0751672	1.30175e+06	-1	-1	0.0497637	1.1538e+06	0.111988	4.4933e+06	0.116977	952583	0.125386	1.16604e+06	0.104959	3.40184e+06	0.0931019	1.43366e+06
215-122	0.125829	1.72355e+06	0.0720215	1.47055e+06	0.136976	1.6956e+06	0.0754123	1.63745e+06	0.116764	4.70785e+06	0.116752	1.02193e+06	0.124482	1.28352e+06	0.108799	3.70679e+06	0.0964338	1.84159e+06
215-123	0.119889	1.42736e+06	0.0686847	910721	0.143784	1.36928e+06	0.0413615	1.08679e+06	0.129884	4.34459e+06	0.127866	878965	0.135521	1.03367e+06	0.123341	3.00354e+06	0.0835818	941412
215-124	0.115119	1.80002e+06	0.0755733	1.30314e+06	0.141402	1.1459e+06	0.0745958	1.37062e+06	0.116327	4.64483e+06	0.126837	932232	0.134804	1.0678e+06	0.104821	3.35187e+06	0.0958129	1.35672e+06
215-126	0.101256	1.43392e+06	0.0668313	860967	-1	-1	0.0699855	1.19466e+06	0.107856	5.15832e+06	0.1321	1.00647e+06	0.12732	824314	0.0976267	3.67703e+06	0.0917468	906423
215-127	0.11549	1.9333e+06	0.0652751	981363	0.139086	1.55742e+06	0.049425	1.09325e+06	0.119735	5.08016e+06	0.124548	1.19145e+06	0.123839	1.33896e+06	0.103442	3.31425e+06	0.0826538	1.15026e+06
215-128	0.120942	1.88886e+06	0.0694715	1.03772e+06	0.143433	1.49376e+06	0.0442365	989338	0.11891	4.14145e+06	0.120276	933621	0.132108	1.22823e+06	0.107594	3.22819e+06	0.0942313	1.1772e+06
215-129	0.112512	1.63811e+06	0.0795307	1.16494e+06	-1	-1	0.0652808	1.18019e+06	0.118329	4.51708e+06	0.138209	690472	0.143243	759135	0.104451	2.90814e+06	0.0954649	1.13877e+06
215-13	0.129282	1.30226e+06	0.0689049	1.14501e+06	0.153825	1.19477e+06	0.0524995	1.62494e+06	0.12347	4.34856e+06	0.124422	864924	0.13023	923925	0.115179	3.13592e+06	0.0861851	1.04493e+06
215-130	0.119618	2.0222e+06	0.0757273	1.37866e+06	0.141142	1.54133e+06	0.0643491	1.5274e+06	0.118123	4.48612e+06	0.110356	810632	0.130637	1.24122e+06	0.109607	3.29768e+06	0.102228	1.90054e+06
215-131	0.118545	1.69873e+06	0.0729466	1.0011e+06	0.139279	1.19471e+06	0.0495646	1.20422e+06	0.117264	4.33248e+06	0.122236	724670	0.132023	971379	0.107245	3.13702e+06	0.0842791	904436
215-132	0.12259	2.18908e+06	0.0696644	1.24825e+06	0.143382	1.50852e+06	0.0589544	1.34519e+06	0.124944	4.54129e+06	0.119973	826143	0.131797	1.20215e+06	0.11419	3.44747e+06	0.0924826	1.49071e+06
215-133	0.113541	1.8101e+06	0.0795001	1.57309e+06	0.149988	1.47061e+06	0.0715045	1.37717e+06	0.137987	4.08555e+06	0.130481	1.05693e+06	0.12857	919697	0.131205	2.85415e+06	0.0919539	932455
215-14	0.103499	2.28436e+06	0.0739072	2.16952e+06	0.142549	1.77419e+06	0.0588627	1.68968e+06	0.111377	5.51101e+06	0.115272	1.28353e+06	0.120635	1.41797e+06	0.108683	4.20278e+06	0.0819946	1.54082e+06
215-15	0.105153	1.57818e+06	0.0716114	1.0779e+06	-1	-1	0.0555524	1.37231e+06	0.107775	4.47223e+06	0.124581	725427	0.133334	873426	0.101644	3.53405e+06	0.0950078	1.37622e+06
215-16	0.114808	1.72809e+06	0.0748075	1.2463e+06	0.148056	1.30667e+06	0.0584725	1.09394e+06	0.109118	4.54153e+06	0.122553	878523	0.134348	1.25369e+06	0.103355	3.55836e+06	0.0972604	1.32184e+06
215-17	0.126577	1.73268e+06	0.0770237	1.22604e+06	0.153194	1.45054e+06	0.0600388	1.2376e+06	0.115382	4.91882e+06	0.11783	853495	0.130709	1.3429e+06	0.105742	3.33955e+06	0.0878849	1.47355e+06
215-18	0.119084	1.98521e+06	0.0724569	1.3128e+06	0.145095	1.60521e+06	0.0579559	1.34625e+06	0.110379	5.21614e+06	0.114298	968031	0.12522	1.41239e+06	0.104048	3.52431e+06	0.0872624	1.53942e+06
215-19	0.109287	1.66143e+06	0.0600575	765688	-1	-1	0.0661186	1.03412e+06	0.0970095	4.46211e+06	0.123788	910794	0.12892	1.02841e+06	0.0973955	3.44721e+06	0.0878217	1.0641e+06
215-21	0.118783	1.50048e+06	0.0699762	735680	-1	-1	0.046202	944340	0.0992331	3.36421e+06	0.127851	930735	0.135366	781326	0.102519	3.16817e+06	0.0834295	698826
215-22	0.11566	1.87325e+06	0.0664917	929292	0.152168	1.43972e+06	0.0625051	1.29687e+06	0.13074	4.67834e+06	0.11999	891004	0.132951	1.35409e+06	0.119126	2.96922e+06	0.0862845	1.35858e+06
215-24	0.127811	1.00277e+06	0.0626185	661656	0.144096	1.37271e+06	0.0547393	1.68333e+06	0.113416	4.60568e+06	0.121464	898967	0.133636	994829	0.101712	2.68473e+06	0.0935499	1.25433e+06
215-25	0.11417	1.54954e+06	0.064093	900745	0.146023	1.46902e+06	0.0510134	1.23809e+06	0.11138	4.92503e+06	0.129285	1.172e+06	0.122212	1.08129e+06	0.101164	3.31693e+06	0.0802837	1.01617e+06
215-26	0.108078	1.76148e+06	0.0805249	1.44059e+06	-1	-1	0.0632311	907878	0.1197	4.52028e+06	0.121498	740581	0.136057	1.14154e+06	0.108449	3.56672e+06	0.0842052	1.08667e+06
215-27	0.124614	1.94576e+06	0.0760902	1.29826e+06	-1	-1	0.069891	1.42932e+06	0.121087	4.68835e+06	0.126214	1.0658e+06	0.131227	1.34789e+06	0.111244	3.55536e+06	0.0922097	1.70188e+06
215-28	0.102321	1.8309e+06	0.0808605	1.6904e+06	-1	-1	0.0667563	1.19035e+06	0.107788	4.49162e+06	0.132347	929387	0.129974	1.13412e+06	0.109517	3.32521e+06	0.129813	1.00478e+06
215-29	0.108098	1.83988e+06	0.0775085	1.50899e+06	-1	-1	0.0496305	1.30827e+06	0.106569	4.41006e+06	0.124353	820361	0.133784	1.14757e+06	0.0958072	3.25547e+06	0.122018	939301
215-3	0.115733	2.0068e+06	0.0732168	1.30739e+06	0.153935	1.40254e+06	0.0651379	1.62498e+06	0.11769	4.85792e+06	0.118328	933986	0.128246	1.3434e+06	0.112126	3.40287e+06	0.0909972	1.67424e+06
215-30	0.106258	1.76726e+06	0.0770983	1.18127e+06	0.149182	1.39587e+06	0.0504102	938476	0.123149	4.33971e+06	0.115968	798731	0.126781	1.14091e+06	0.115706	2.89558e+06	0.100367	968693
215-32	0.120489	1.63132e+06	0.078297	1.28841e+06	0.15154	1.25777e+06	0.0607988	1.10204e+06	0.129567	3.27984e+06	0.124327	924987	0.130588	1.06113e+06	0.121372	2.84592e+06	0.123073	1.29035e+06
215-33	0.124368	1.59369e+06	0.0748906	1.2919e+06	0.141192	1.63351e+06	0.0441047	1.40685e+06	0.118792	5.06964e+06	0.121559	1.15425e+06	0.124483	1.27415e+06	0.107913	3.36773e+06	0.107784	1.08239e+06
215-34	0.10637	2.09076e+06	0.0731184	1.55538e+06	-1	-1	0.0574905	1.21122e+06	0.123952	5.38945e+06	0.115706	1.15141e+06	0.125029	1.40164e+06	0.115867	3.41968e+06	0.125381	1.5327e+06
215-35	0.110917	1.58643e+06	0.0770445	1.58155e+06	0.155195	1.31407e+06	0.073907	1.35786e+06	0.116872	4.43922e+06	0.124495	939016	0.130862	1.03281e+06	0.107546	3.11132e+06	0.113196	1.25134e+06
215-36	0.125697	1.52444e+06	0.0713073	1.24109e+06	0.15125	1.26272e+06	0.0601071	1.78432e+06	0.125523	4.70676e+06	0.127236	1.04368e+06	0.131367	1.16493e+06	0.110093	3.05076e+06	0.108378	959831
215-37	0.117901	1.69859e+06	0.0777876	1.39211e+06	0.145849	1.37151e+06	0.0584967	1.25974e+06	0.12421	4.68829e+06	0.117811	847299	0.129293	1.24254e+06	0.115939	2.82437e+06	0.118321	1.2898e+06
215-38	0.103198	1.51467e+06	0.0695644	1.05826e+06	-1	-1	0.0544255	831339	0.116303	4.25354e+06	0.127921	919398	0.134627	1.06066e+06	0.106349	2.96898e+06	0.12199	931816
215-39	0.112855	2.54676e+06	0.0901401	2.58593e+06	0.15522	1.26976e+06	0.0654142	1.43792e+06	0.122972	5.0949e+06	0.121919	814744	0.132115	1.13912e+06	0.10914	3.65162e+06	0.119844	1.49573e+06
215-4	0.106275	1.7646e+06	0.0723019	1.58675e+06	0.156575	1.34461e+06	0.0567191	1.51773e+06	0.115855	4.75989e+06	0.123514	943047	0.130971	1.09626e+06	0.109106	3.62281e+06	0.0899069	1.62173e+06
215-40	0.121114	923102	0.0712029	859821	-1	-1	0.0568943	788091	0.114247	3.55805e+06	0.139108	747561	0.142079	869543	0.0984762	2.58578e+06	0.120249	529136
215-41	0.106512	1.01197e+06	0.0668418	1.06551e+06	0.155166	814382	0.0537744	465744	0.106758	4.05879e+06	0.109321	446088	0.137901	880093	0.0959751	3.22297e+06	0.117514	625584
215-42	0.119975	1.9243e+06	0.0698776	1.45131e+06	0.145819	1.29285e+06	0.0739618	1.42961e+06	0.112198	4.56975e+06	0.122853	1.0677e+06	0.128056	1.11201e+06	0.105551	3.22435e+06	0.118241	1.30854e+06
215-43	0.134194	1.47399e+06	0.0700059	1.42347e+06	0.153116	1.37624e+06	0.0554162	1.14664e+06	0.117918	4.19168e+06	0.123667	946578	0.132647	1.12937e+06	0.113807	3.02378e+06	0.102227	867770
215-44	0.112098	1.48365e+06	0.0682778	1.42099e+06	0.159345	1.29134e+06	0.0553209	1.13062e+06	0.121043	4.42653e+06	0.122274	920401	0.132932	1.22052e+06	0.110922	3.15865e+06	0.121898	1.30355e+06
215-46	0.125098	1.49781e+06	0.0665635	1.09507e+06	0.145945	1.38747e+06	0.0534505	1.13018e+06	0.113282	4.90985e+06	0.122685	1.02563e+06	0.12643	1.15596e+06	0.104721	3.2136e+06	0.103612	712640
215-5	0.109932	1.59902e+06	0.0666869	1.26591e+06	-1	-1	0.0693879	1.51857e+06	0.113672	4.9581e+06	0.11848	1.07624e+06	0.12469	1.41162e+06	0.104558	3.6354e+06	0.0853763	1.15398e+06
215-51	0.126696	1.30512e+06	0.0668217	962359	-1	-1	0.0685229	699988	0.114539	4.07843e+06	0.12588	601718	0.135832	796821	0.105911	3.1162e+06	0.128393	840238
215-52	0.121716	1.82214e+06	0.0728717	1.49521e+06	-1	-1	0.0812345	1.30147e+06	0.11487	4.06596e+06	0.11373	569909	0.140806	1.04139e+06	0.106083	3.29118e+06	0.114833	769714
215-53	0.11493	1.03058e+06	0.0776002	1.15034e+06	-1	-1	0.082758	984649	0.121473	3.97319e+06	0.120963	870417	0.136997	1.05207e+06	0.110663	3.24163e+06	0.0836656	748352
215-55	0.119694	1.60645e+06	0.072223	1.21791e+06	0.133385	1.44554e+06	0.0490904	1.40959e+06	0.119588	4.66587e+06	0.12541	1.08829e+06	0.136082	1.24222e+06	0.108466	3.09924e+06	0.0937096	1.07922e+06
215-56	0.132317	1.31766e+06	0.0716279	1.05603e+06	0.133307	1.5139e+06	0.0606917	1.3692e+06	0.116896	4.27506e+06	0.11901	991727	0.126321	1.1296e+06	0.108482	2.97294e+06	0.10162	1.44786e+06
215-57	0.109396	1.75224e+06	0.0727874	1.04298e+06	0.130994	1.59095e+06	0.0639108	1.32739e+06	0.119043	4.14252e+06	0.124459	1.09475e+06	0.126527	1.16494e+06	0.106084	3.26721e+06	0.0985857	1.21088e+06
215-59	0.12142	1.46358e+06	0.0839194	1.21534e+06	-1	-1	0.0759652	1.27332e+06	0.129269	3.76849e+06	0.130647	885646	0.139849	1.01022e+06	0.118083	3.02996e+06	0.0998023	1.11977e+06
215-6	0.114612	1.90371e+06	0.0642429	1.05179e+06	0.14545	1.29153e+06	0.0557013	1.49794e+06	0.125226	4.49175e+06	0.120602	1.03493e+06	0.124503	1.32918e+06	0.115484	3.27024e+06	0.0860295	1.17451e+06
215-60	0.117405	1.53349e+06	0.0785098	932854	-1	-1	0.085594	1.14367e+06	0.120303	3.79798e+06	0.130176	737667	0.141072	854943	0.108375	2.96502e+06	0.100024	1.0668e+06
215-61	0.116209	2.15532e+06	0.0728102	1.33196e+06	-1	-1	0.0604694	1.34325e+06	0.11767	4.53627e+06	0.121662	1.09195e+06	0.125346	1.14862e+06	0.104962	3.45811e+06	0.101363	1.5881e+06
215-62	0.116689	1.57034e+06	0.0748527	1.33575e+06	0.136184	1.51106e+06	0.0532464	1.3424e+06	0.119131	4.52652e+06	0.122006	1.08012e+06	0.13697	1.35301e+06	0.11311	3.39372e+06	0.0952382	1.28826e+06
215-63	0.114097	1.01326e+06	0.0814902	1.20939e+06	-1	-1	0.0681518	1.08025e+06	0.117423	4.25033e+06	0.128761	750994	0.140044	973864	0.109494	3.2706e+06	0.0886029	664114
215-64	0.117231	955293	0.0669874	836382	-1	-1	0.0524956	911355	0.117596	3.49869e+06	0.133806	760342	0.145458	840867	0.103696	2.86995e+06	0.0906662	657674
215-65	0.118637	1.17146e+06	0.0716558	916210	-1	-1	0.0473013	970587	0.116237	4.50876e+06	0.12177	899534	0.128253	1.15909e+06	0.106131	3.28902e+06	0.0967181	1.11094e+06
215-66	0.113434	1.68838e+06	0.0709919	1.21692e+06	0.134307	1.62765e+06	0.066035	1.33324e+06	0.125313	4.79392e+06	0.118677	1.00958e+06	0.127223	1.44171e+06	0.119345	3.42334e+06	0.0949028	1.1565e+06
215-67	0.12642	1.43448e+06	0.0794513	1.21926e+06	0.142282	1.15323e+06	0.0786995	1.27878e+06	0.120308	3.91729e+06	0.11973	722893	0.138458	947674	0.108599	3.10051e+06	0.0979323	995537
215-68	0.11178	1.41557e+06	0.0737288	723794	-1	-1	0.0656375	1.09643e+06	0.1126	3.93492e+06	0.127679	788362	0.142669	881462	0.100491	3.15946e+06	0.0957112	755500
215-69	0.110924	1.85613e+06	0.0760904	1.29775e+06	-1	-1	0.0726701	1.10898e+06	0.126931	4.29154e+06	0.123225	922604	0.129051	1.12497e+06	0.117261	3.03945e+06	0.0963913	1.01662e+06
215-7	0.13222	1.66946e+06	0.0785126	1.69368e+06	0.153472	1.28705e+06	0.0561819	1.38959e+06	0.120306	4.22473e+06	0.119207	884954	0.133	1.2468e+06	0.113472	3.33533e+06	0.080537	925824
215-70	0.109018	1.55606e+06	0.0866752	1.40172e+06	-1	-1	0.0640293	998066	0.1106	3.9021e+06	0.113867	606487	0.13177	989255	0.105056	3.56796e+06	0.1068	1.19055e+06
215-71	0.120097	1.963e+06	0.0742762	1.38131e+06	0.142006	1.40367e+06	0.0717101	1.38122e+06	0.13843	4.48344e+06	0.122061	899620	0.132003	1.19292e+06	0.133383	3.39932e+06	0.098769	1.64152e+06
215-72	0.116293	2.28175e+06	0.0736135	1.12956e+06	0.143672	1.36482e+06	0.0752337	1.4183e+06	0.124872	4.43033e+06	0.128315	1.19988e+06	0.130873	1.43409e+06	0.113441	3.36565e+06	0.0900554	1.18467e+06
215-73	0.111195	1.63486e+06	0.06942	1.05837e+06	0.137245	1.49054e+06	0.0576259	1.45986e+06	0.132883	4.18109e+06	0.12443	1.24218e+06	0.124236	1.11142e+06	0.124981	3.33209e+06	0.0935174	959892
215-74	0.116539	1.62941e+06	0.0743258	1.30719e+06	0.131899	1.42124e+06	0.0588666	1.24272e+06	0.122375	4.67884e+06	0.120027	981224	0.125361	1.27935e+06	0.117192	3.34085e+06	0.0931097	1.4587e+06
215-75	0.107361	1.95858e+06	0.0721415	1.0441e+06	-1	-1	0.0771874	1.25312e+06	0.139319	3.72364e+06	0.133724	941423	0.137872	1.08386e+06	0.127843	3.19605e+06	0.104405	1.57438e+06
215-77	0.131327	2.0426e+06	0.0738558	1.34773e+06	0.134232	1.67513e+06	0.0630695	1.41972e+06	0.11229	4.42719e+06	0.128136	881770	0.120233	1.18457e+06	0.107082	3.47848e+06	0.0884057	1.65479e+06
215-78	0.133768	1.71221e+06	0.0718585	1.11413e+06	-1	-1	0.0584407	1.16077e+06	0.109791	3.95615e+06	0.125969	1.0096e+06	0.126028	1.24369e+06	0.103196	3.41607e+06	0.0923025	1.6645e+06
215-8	0.112522	1.42209e+06	0.0696669	956744	-1	-1	0.0632891	672700	0.128008	3.37345e+06	0.135758	817595	0.138594	847927	0.117444	2.99492e+06	0.0850358	770205
215-80	0.115461	1.74962e+06	0.0759055	1.36396e+06	0.140473	1.69159e+06	0.0725481	1.35498e+06	0.131882	3.83616e+06	0.132912	1.13743e+06	0.130777	1.3012e+06	0.125039	2.97214e+06	0.0944206	1.73005e+06
215-81	0.115289	1.61146e+06	0.0821195	1.46925e+06	-1	-1	0.0645001	1.33961e+06	0.109042	4.23342e+06	0.138925	769267	0.126243	885956	0.105507	3.37551e+06	0.089145	1.54603e+06
215-82	0.131919	1.73192e+06	0.0743609	1.42197e+06	0.132876	1.54207e+06	0.062531	1.13306e+06	0.11308	4.39996e+06	0.119213	975083	0.124141	1.37787e+06	0.107313	3.34458e+06	0.084837	1.33253e+06
215-83	0.114974	2.19977e+06	0.0808163	1.60865e+06	-1	-1	0.0676184	1.38373e+06	0.117101	3.9894e+06	0.122909	931997	0.128833	1.39695e+06	0.110626	3.29492e+06	0.0917462	1.52723e+06
215-84	0.111536	1.66561e+06	0.0804041	1.70597e+06	0.145554	1.51853e+06	0.0671348	1.06907e+06	0.135046	4.14045e+06	0.132807	1.08053e+06	0.129047	964162	0.134354	3.01888e+06	0.0836811	1.70209e+06
215-85	0.117899	1.69972e+06	0.0713536	1.00811e+06	0.133596	1.19041e+06	0.0607157	1.30324e+06	0.11868	3.84396e+06	0.137764	930695	0.131839	1.1013e+06	0.109088	3.06072e+06	0.0887992	1.40515e+06
215-86	0.117974	1.99493e+06	0.0811125	1.47132e+06	-1	-1	0.0661029	1.47835e+06	0.122537	3.99989e+06	0.118957	986554	0.127288	1.23202e+06	0.1156	3.24114e+06	0.0870975	1.51228e+06
215-9	0.108584	1.53131e+06	0.0603317	1.13059e+06	0.151387	1.24499e+06	0.0440957	1.29923e+06	0.11038	4.73221e+06	0.123403	1.02749e+06	0.127348	1.18618e+06	0.105239	3.51777e+06	0.0851507	1.16496e+06
216-1	0.134492	1.47347e+06	0.0782947	1.75517e+06	0.143198	1.2123e+06	0.0429881	788919	0.0811894	2.01385e+06	0.115629	891003	0.122447	1.1687e+06	0.110325	2.90816e+06	0.0914276	2.04312e+06
216-10	0.144621	1.98318e+06	0.0674937	1.74586e+06	0.153745	1.50003e+06	0.0416163	1.57504e+06	0.0853355	2.50445e+06	0.122563	1.53983e+06	0.130967	1.94449e+06	0.108464	3.70187e+06	0.0928244	1.95596e+06
216-11	0.134455	2.05662e+06	0.0702819	1.73752e+06	0.157796	1.6018e+06	0.0694013	1.83e+06	0.0872924	2.58836e+06	0.133994	1.63032e+06	0.134701	1.67431e+06	0.114275	3.75276e+06	0.0936038	2.26879e+06
216-120	0.169376	815630	0.0729453	696856	0.158712	710333	0.0593026	578414	0.128882	2.93239e+06	0.136633	533466	0.150299	929969	0.10661	2.19533e+06	0.0914993	1.00833e+06
216-121	0.128415	1.87091e+06	0.0782668	1.58869e+06	0.137611	1.29364e+06	0.0374857	2.22693e+06	0.0908704	2.23868e+06	0.121647	1.00813e+06	0.130209	1.46166e+06	0.105786	3.24427e+06	0.0979671	1.90849e+06
216-122	0.139241	1.56713e+06	0.0781013	1.75599e+06	0.143879	1.49353e+06	0.0718223	1.31334e+06	0.092187	1.9492e+06	0.119399	984620	0.130663	1.46737e+06	0.111805	3.15184e+06	0.0983751	2.32052e+06
216-123	0.141534	1.46045e+06	0.0684315	1.27973e+06	0.151055	1.5326e+06	0.0375135	1.88826e+06	0.088399	1.91619e+06	0.127148	1.11546e+06	0.139072	1.60665e+06	0.115427	3.25758e+06	0.0906908	1.56674e+06
216-124	0.131209	1.6077e+06	0.0835071	1.55064e+06	0.149057	1.02206e+06	0.0625854	1.22485e+06	0.124518	4.8263e+06	0.124201	798286	0.140133	1.08175e+06	0.108828	3.0038e+06	0.102664	1.99902e+06
216-126	0.120775	1.33168e+06	0.0714128	1.09274e+06	0.142189	935284	0.060866	961844	0.090965	2.0385e+06	0.136356	1.18105e+06	0.133927	885591	0.104712	3.21242e+06	0.0974467	1.45583e+06
216-127	0.131359	2.2144e+06	0.0629097	1.3162e+06	0.143203	1.79923e+06	0.0494207	1.19815e+06	0.118006	5.71888e+06	0.125678	1.49266e+06	0.127415	2.1642e+06	0.106781	3.51719e+06	0.0862589	1.70493e+06
216-128	0.131846	1.71868e+06	0.0716169	1.14621e+06	0.14943	1.37123e+06	0.0378837	746667	0.0877994	1.79227e+06	0.121904	820927	0.137684	1.43406e+06	0.1091	2.96834e+06	0.0969688	1.5395e+06
216-129	0.12572	1.3893e+06	0.0877612	1.31263e+06	0.151459	721538	0.050964	997040	0.101387	1.65199e+06	0.136594	793086	0.1463	946133	0.107646	2.82117e+06	0.103909	1.88036e+06
216-13	0.154174	1.50843e+06	0.0696718	1.37169e+06	0.16927	1.23078e+06	0.0500421	1.24295e+06	0.0823676	2.26079e+06	0.12653	1.30036e+06	0.12983	1.29746e+06	0.125176	3.0398e+06	0.0882978	1.92984e+06
216-130	0.137615	1.85528e+06	0.0786652	1.52635e+06	0.144198	1.38069e+06	0.0568966	1.21394e+06	0.0925288	1.9479e+06	0.114347	803122	0.132829	1.41558e+06	0.110363	3.09042e+06	0.103217	2.24626e+06
216-131	0.135414	1.67827e+06	0.070397	1.19113e+06	0.145629	1.54851e+06	0.0466833	1.27024e+06	0.0867493	2.21468e+06	0.11482	961476	0.132924	1.64583e+06	0.11755	3.31737e+06	0.0953112	1.52226e+06
216-132	0.139749	2.0965e+06	0.0689718	1.64641e+06	0.148654	1.69623e+06	0.0614391	1.40646e+06	0.0899244	2.05138e+06	0.12221	1.1304e+06	0.13419	2.05477e+06	0.11584	3.57737e+06	0.0958457	2.09035e+06
216-133	0.131846	1.44181e+06	0.0819682	1.65928e+06	0.156071	1.39788e+06	0.0632714	1.21341e+06	0.125446	4.60416e+06	0.139513	1.07344e+06	0.137322	1.06573e+06	0.114818	2.94602e+06	0.0943093	1.48697e+06
216-14	0.137781	1.68409e+06	0.085698	2.86165e+06	0.147101	1.43269e+06	0.0545282	961593	0.0850533	2.3918e+06	0.113396	997480	0.121393	1.21526e+06	0.112825	3.26395e+06	0.0869953	1.972e+06
216-15	0.133985	1.22451e+06	0.0761824	1.54765e+06	0.1464	1.09121e+06	0.0504417	875968	0.0809861	2.035e+06	0.126251	981420	0.130872	828712	0.102993	3.057e+06	0.0991563	1.98787e+06
216-16	0.147912	1.31797e+06	0.0793495	1.52236e+06	0.152822	1.088e+06	0.0468657	721844	0.0823633	1.6875e+06	0.117494	739276	0.138481	1.04298e+06	0.110714	2.78507e+06	0.0990257	1.86898e+06
216-17	0.150165	1.46675e+06	0.0747905	1.29012e+06	0.159079	1.35016e+06	0.0478961	1.10092e+06	0.0879434	2.07192e+06	0.118574	779839	0.136225	1.37637e+06	0.113454	3.13304e+06	0.0925496	1.75774e+06
216-18	0.136574	1.68074e+06	0.0727389	1.42379e+06	0.151651	1.40248e+06	0.0483903	1.26016e+06	0.0875788	2.43548e+06	0.11604	919982	0.129695	1.53626e+06	0.111853	3.28309e+06	0.0924098	1.86116e+06
216-19	0.130746	1.35325e+06	0.0673299	1.07281e+06	0.147128	1.13413e+06	0.0547809	716913	0.079696	1.93528e+06	0.12216	818003	0.127993	933021	0.103307	3.04358e+06	0.0920929	1.71768e+06
216-21	0.130316	1.09087e+06	0.0714817	693595	0.159504	898112	0.0490196	635414	0.117957	3.44903e+06	0.138748	814364	0.141707	745843	0.100505	2.59204e+06	0.0898698	922827
216-22	0.13357	2.28111e+06	0.0646541	1.26504e+06	0.159012	1.56073e+06	0.0451857	1.2794e+06	0.136265	5.39702e+06	0.121197	1.25726e+06	0.135069	1.97037e+06	0.116216	3.45249e+06	0.0873391	2.11113e+06
216-24	0.151873	705931	0.0609503	649311	0.156788	1.11209e+06	0.0481417	913613	0.0848189	1.73576e+06	0.122293	921130	0.139402	1.05191e+06	0.106361	2.06423e+06	0.101728	1.7212e+06
216-25	0.129832	1.24597e+06	0.0616075	1.02299e+06	0.15792	1.25432e+06	0.0419253	1.62899e+06	0.124789	4.93942e+06	0.134202	1.08118e+06	0.128241	1.0563e+06	0.1071	2.82541e+06	0.0856183	1.29129e+06
216-26	0.135312	1.3399e+06	0.086889	2.05495e+06	0.147361	1.15735e+06	0.0538396	730310	0.0891184	1.91514e+06	0.117499	695403	0.139221	971682	0.110009	3.13504e+06	0.0915595	1.55675e+06
216-27	0.141839	1.69938e+06	0.0712179	1.34549e+06	0.161282	1.38176e+06	0.0697595	1.22918e+06	0.124093	4.58116e+06	0.125523	945840	0.138048	1.50331e+06	0.109875	3.53964e+06	0.0966459	2.09369e+06
216-28	0.116493	1.63519e+06	0.0947218	2.1212e+06	0.160254	885343	0.0604639	897585	0.114116	4.81434e+06	0.133033	735857	0.139244	1.20125e+06	0.105383	2.90438e+06	0.14212	1.202e+06
216-29	0.121415	1.4558e+06	0.0927924	1.80566e+06	0.155848	869819	0.0434338	865281	0.0877599	1.99567e+06	0.126457	846288	0.137378	1.31774e+06	0.100663	2.82249e+06	0.131677	1.28117e+06
216-3	0.131715	1.5174e+06	0.0755681	1.23182e+06	0.159498	1.27748e+06	0.058747	1.95345e+06	0.0866746	1.93989e+06	0.119955	833004	0.135623	1.47031e+06	0.119905	2.79813e+06	0.095672	1.98492e+06
216-30	0.131146	1.37338e+06	0.0867729	1.73224e+06	0.154219	1.14973e+06	0.0428373	659494	0.0887681	1.69892e+06	0.116377	742472	0.131108	1.12295e+06	0.115377	2.52849e+06	0.110087	1.23553e+06
216-32	0.142892	1.42158e+06	0.0793031	1.42608e+06	0.161114	1.19649e+06	0.0452383	1.078e+06	0.123714	4.68377e+06	0.128494	949256	0.134117	1.18405e+06	0.111751	2.86043e+06	0.131815	1.54438e+06
216-33	0.141954	1.71381e+06	0.0725122	1.71895e+06	0.147258	1.64185e+06	0.04439	1.26378e+06	0.0854646	2.48463e+06	0.121704	1.99331e+06	0.127081	1.95682e+06	0.115447	3.50658e+06	0.116693	1.57323e+06
216-34	0.113389	2.67527e+06	0.0724585	2.19933e+06	0.145276	1.72548e+06	0.0493271	1.21207e+06	0.0922485	2.65947e+06	0.118398	1.99467e+06	0.123498	2.17384e+06	0.108627	4.08689e+06	0.132268	2.09475e+06
216-35	0.142792	1.21637e+06	0.0860666	1.77279e+06	0.166422	1.15192e+06	0.0738301	1.2661e+06	0.0847534	1.97608e+06	0.132713	1.05917e+06	0.133176	1.08188e+06	0.118517	2.2373e+06	0.128682	1.46542e+06
216-36	0.142688	1.43972e+06	0.0753009	1.37336e+06	0.158351	1.15783e+06	0.0569086	917726	0.0840138	1.64717e+06	0.128314	1.02029e+06	0.138052	1.43698e+06	0.122335	2.69731e+06	0.122695	1.47836e+06
216-37	0.149682	1.61043e+06	0.0789772	1.78692e+06	0.153413	1.43564e+06	0.0419717	1.24997e+06	0.0865742	2.05535e+06	0.120585	1.52911e+06	0.131949	1.82257e+06	0.129624	2.56148e+06	0.132889	1.85524e+06
216-38	0.11757	1.2861e+06	0.0724009	1.04681e+06	0.158112	905973	0.0493526	947115	0.0920575	1.70769e+06	0.123286	779224	0.13986	1.24327e+06	0.105362	2.75921e+06	0.134317	1.20032e+06
216-39	0.124232	2.40269e+06	0.102293	3.55473e+06	0.147158	1.27965e+06	0.0554718	944390	0.0877147	2.11264e+06	0.121289	1.18549e+06	0.129122	1.2482e+06	0.109553	3.73298e+06	0.13727	2.00938e+06
216-4	0.129066	1.4169e+06	0.0830455	1.91176e+06	0.156711	1.17729e+06	0.0440493	973795	0.118482	4.89355e+06	0.126341	836689	0.131133	967585	0.110797	2.97552e+06	0.0933054	1.92837e+06
216-40	0.142019	911941	0.0739211	998202	0.164867	742304	0.0441865	868338	0.0895582	1.51015e+06	0.128354	607629	0.145099	1.15988e+06	0.105694	2.07833e+06	0.132245	959172
216-41	0.131468	948848	0.0716307	1.11861e+06	0.162827	702974	0.0510483	433503	0.0882384	1.42774e+06	0.101146	382287	0.14267	996752	0.101411	2.64087e+06	0.129068	1.06224e+06
216-42	0.129858	1.83798e+06	0.0715705	1.52782e+06	0.152468	1.12344e+06	0.0682018	1.16271e+06	0.0863563	2.1098e+06	0.123503	940960	0.132953	1.37162e+06	0.106696	2.98753e+06	0.133344	1.68101e+06
216-43	0.160425	1.61712e+06	0.0761334	1.83826e+06	0.151131	1.36674e+06	0.0474324	703856	0.095621	2.44928e+06	0.116829	1.12478e+06	0.130191	1.34825e+06	0.116122	2.92068e+06	0.114883	1.47725e+06
216-44	0.125343	1.73154e+06	0.0682971	1.8094e+06	0.162789	1.5203e+06	0.0470809	1.00173e+06	0.084144	2.25042e+06	0.124936	1.48792e+06	0.13575	1.69771e+06	0.109167	3.70677e+06	0.133866	1.85695e+06
216-46	0.138242	1.75438e+06	0.0680115	1.31939e+06	0.151455	1.57581e+06	0.0487122	1.05371e+06	0.0838822	2.51512e+06	0.121184	1.46937e+06	0.127882	1.77144e+06	0.111643	3.48478e+06	0.115399	1.41263e+06
216-5	0.131385	1.44499e+06	0.0687934	1.52767e+06	0.147401	1.11389e+06	0.0563402	1.59844e+06	0.0874613	2.07606e+06	0.119785	978778	0.129619	1.55114e+06	0.110173	3.1391e+06	0.0894528	1.58663e+06
216-51	0.154812	1.06313e+06	0.0677868	873870	0.172947	677426	0.0598997	558358	0.112451	3.49663e+06	0.131692	486983	0.145558	730534	0.10612	2.69054e+06	0.14212	1.128e+06
216-52	0.149149	1.36344e+06	0.0845373	1.74957e+06	0.162352	696475	0.073884	968329	0.0874777	1.68884e+06	0.105847	537487	0.14481	839209	0.109079	2.60952e+06	0.130562	1.24418e+06
216-53	0.135456	1.12272e+06	0.0872052	1.46997e+06	0.135317	992042	0.0757785	904871	0.119946	3.97019e+06	0.122203	778312	0.141712	1.15994e+06	0.106581	2.94346e+06	0.10326	1.18853e+06
216-55	0.152156	1.56118e+06	0.0745125	1.59423e+06	0.145383	1.64775e+06	0.0431178	1.33207e+06	0.0794775	2.15636e+06	0.124543	1.42903e+06	0.138466	1.75992e+06	0.125851	2.684e+06	0.0973566	1.82376e+06
216-56	0.155005	1.46738e+06	0.0732121	1.46941e+06	0.142989	1.76084e+06	0.0635174	1.57152e+06	0.0896952	2.50143e+06	0.12592	1.56908e+06	0.12873	1.5308e+06	0.117814	2.98803e+06	0.0996256	2.10599e+06
216-57	0.123928	1.62953e+06	0.0794023	1.2071e+06	0.13737	1.31279e+06	0.0542606	1.26669e+06	0.0848873	1.99033e+06	0.130396	1.12398e+06	0.130934	1.18868e+06	0.106596	3.113e+06	0.100364	1.65666e+06
216-59	0.14235	1.32648e+06	0.0938135	1.18356e+06	0.144134	799236	0.0728015	1.16842e+06	0.0942296	1.52743e+06	0.127934	717975	0.145532	1.06411e+06	0.116079	2.75636e+06	0.108112	1.29912e+06
216-6	0.130483	1.57403e+06	0.0730938	1.4726e+06	0.132363	1.16638e+06	0.0367074	982234	0.08419	1.98066e+06	0.114584	848230	0.125424	1.40654e+06	0.114312	2.83869e+06	0.0903169	1.75956e+06
216-60	0.132165	1.4378e+06	0.0863903	1.35668e+06	0.143599	992916	0.0776419	1.28729e+06	0.0893488	1.77485e+06	0.127819	807092	0.142515	1.18154e+06	0.113328	2.94845e+06	0.10553	1.83748e+06
216-61	0.134255	1.63545e+06	0.0825611	1.66962e+06	0.138458	1.31189e+06	0.0457914	1.30607e+06	0.120234	5.12455e+06	0.128243	1.05828e+06	0.133377	1.20418e+06	0.109829	3.03668e+06	0.105859	1.98852e+06
216-62	0.138492	1.56717e+06	0.0800348	1.45212e+06	0.140326	1.29778e+06	0.046057	1.27821e+06	0.0880753	1.91447e+06	0.122246	920106	0.140473	1.50425e+06	0.111238	3.17913e+06	0.0990067	1.6542e+06
216-63	0.153464	923809	0.0990596	1.80285e+06	0.144539	733132	0.0600458	782137	0.0887199	1.67646e+06	0.118857	630297	0.146199	854586	0.117257	2.43286e+06	0.107019	1.19218e+06
216-64	0.143232	816436	0.0722823	811266	0.149002	761638	0.0407755	824357	0.0915515	1.51145e+06	0.125384	527808	0.149962	967550	0.108122	2.54088e+06	0.0998932	1.08089e+06
216-65	0.140019	1.21893e+06	0.0831164	1.63713e+06	0.128411	1.06639e+06	0.0467731	655594	0.0845017	2.08361e+06	0.115293	1.12273e+06	0.125927	1.22018e+06	0.110335	3.13767e+06	0.102156	1.92717e+06
216-66	0.126757	1.4292e+06	0.0759891	1.33805e+06	0.140367	1.4e+06	0.0567029	1.19586e+06	0.0950043	2.14834e+06	0.121183	883592	0.132373	1.64403e+06	0.115285	3.14258e+06	0.100416	1.58464e+06
216-67	0.144773	1.15715e+06	0.0909165	1.3878e+06	0.151634	896809	0.0593044	1.06618e+06	0.0876395	1.78781e+06	0.118136	677319	0.146241	996935	0.109507	2.79879e+06	0.104466	1.47838e+06
216-68	0.127237	1.21439e+06	0.0767594	880034	0.149026	700716	0.0479552	1.92783e+06	0.0892714	1.82798e+06	0.127294	828995	0.145201	1.04184e+06	0.111255	2.69839e+06	0.101091	1.21095e+06
216-69	0.135545	1.22446e+06	0.083294	1.39668e+06	0.143592	1.03541e+06	0.0641439	1.0489e+06	0.0936305	1.90857e+06	0.12631	903930	0.132889	1.04969e+06	0.120796	2.58413e+06	0.103308	1.50681e+06
216-7	0.14947	1.30256e+06	0.0932774	1.99355e+06	0.152037	1.10682e+06	0.0407132	819436	0.0828705	1.72309e+06	0.111453	736629	0.134981	1.11816e+06	0.117438	2.55985e+06	0.0868342	1.30934e+06
216-70	0.122653	1.47441e+06	0.0953719	1.58531e+06	0.141704	859762	0.0639367	959537	0.0891434	1.90439e+06	0.122472	639544	0.134847	1.03744e+06	0.106328	3.28673e+06	0.110869	1.58705e+06
216-71	0.132848	1.69919e+06	0.0813839	1.48336e+06	0.151473	1.25252e+06	0.0591835	1.26943e+06	0.125758	4.71541e+06	0.134036	877136	0.139272	1.17109e+06	0.118228	3.25921e+06	0.106226	2.01726e+06
216-72	0.136074	1.918e+06	0.0810118	1.28543e+06	0.144886	1.16876e+06	0.0644113	1.10578e+06	0.0932781	2.02068e+06	0.123831	875527	0.135511	1.36895e+06	0.115669	2.80937e+06	0.094852	1.43185e+06
216-73	0.124981	1.53073e+06	0.0705633	1.27981e+06	0.144459	1.27408e+06	0.0528865	1.511e+06	0.10599	5.03607e+06	0.130202	1.17826e+06	0.131614	1.2517e+06	0.111814	3.31948e+06	0.0976073	1.39992e+06
216-74	0.134439	2.00967e+06	0.0734337	1.65463e+06	0.139991	1.81739e+06	0.0521977	1.61027e+06	0.121302	5.90854e+06	0.122855	1.56499e+06	0.128042	1.93967e+06	0.117453	3.49225e+06	0.0977041	2.03674e+06
216-75	0.124928	1.42232e+06	0.0740588	1.09482e+06	0.152479	682944	0.0586264	1.21645e+06	0.105213	1.78008e+06	0.130312	661286	0.149495	1.1678e+06	0.113833	3.01712e+06	0.111622	1.81059e+06
216-77	0.145448	1.90404e+06	0.0723566	1.58101e+06	0.141942	1.68556e+06	0.0527014	1.18522e+06	0.11805	5.18864e+06	0.126027	1.42913e+06	0.124843	1.59403e+06	0.110172	3.59172e+06	0.085574	2.3003e+06
216-78	0.149041	1.54585e+06	0.0829713	1.33292e+06	0.133749	1.21213e+06	0.0449095	686999	0.0815369	1.85935e+06	0.116273	897218	0.127765	1.26965e+06	0.110843	2.69468e+06	0.0867386	1.91339e+06
216-8	0.139022	1.08746e+06	0.0723181	874230	0.171836	865824	0.0611262	780831	0.0886312	1.24189e+06	0.141965	751171	0.144197	886373	0.106814	3.03297e+06	0.0918501	1.2161e+06
216-80	0.137824	1.75368e+06	0.0808474	1.60984e+06	0.151427	1.66236e+06	0.0686236	1.44713e+06	0.0906249	2.07089e+06	0.132406	1.58431e+06	0.137737	1.94866e+06	0.122862	3.56665e+06	0.0934332	2.63479e+06
216-81	0.137397	1.3291e+06	0.102099	2.06529e+06	0.136166	907391	0.0516814	653483	0.0867341	1.78976e+06	0.122262	823547	0.12687	753460	0.117757	2.36926e+06	0.0954289	2.05856e+06
216-82	0.150539	1.5289e+06	0.0949856	2.12145e+06	0.137232	1.36359e+06	0.0562183	865406	0.0891592	1.95933e+06	0.108192	827178	0.125822	1.39888e+06	0.109675	2.8669e+06	0.0902072	1.74994e+06
216-83	0.132905	2.11156e+06	0.0874722	1.96944e+06	0.146046	1.80856e+06	0.0600722	1.30899e+06	0.121828	4.55692e+06	0.124121	1.56529e+06	0.133721	2.07899e+06	0.113331	3.73781e+06	0.0876652	2.34274e+06
216-84	0.119926	1.73794e+06	0.0841161	1.74467e+06	0.153132	1.43264e+06	0.0557375	815798	0.0998225	2.0825e+06	0.138379	1.09787e+06	0.133757	1.09482e+06	0.11826	3.06062e+06	0.0868947	2.11346e+06
216-85	0.126996	1.5843e+06	0.0743649	1.27772e+06	0.13946	1.20302e+06	0.0533901	1.04733e+06	0.0809452	1.7286e+06	0.129518	1.02161e+06	0.135347	1.34824e+06	0.111884	2.88906e+06	0.0912686	1.83769e+06
216-86	0.135319	1.66634e+06	0.0908992	1.75945e+06	0.138727	1.20118e+06	0.0626424	1.05273e+06	0.0862167	1.71546e+06	0.116448	932678	0.130086	1.232e+06	0.114253	2.77695e+06	0.0855817	1.86962e+06
216-9	0.134703	1.23737e+06	0.0676529	1.20197e+06	0.149319	1.20152e+06	0.0392697	692679	0.0864828	1.96612e+06	0.123399	943533	0.129463	1.07065e+06	0.110057	2.87864e+06	0.0881001	1.65744e+06
217-1	0.132229	1.38953e+06	0.0847869	1.82982e+06	0.147405	1.18252e+06	0.0686596	1.37765e+06	0.121651	5.43452e+06	0.120033	984037	0.119778	1.13795e+06	0.113479	3.06641e+06	0.091528	1.90909e+06
217-10	0.132296	1.07198e+06	0.0813841	1.43863e+06	0.157512	876383	0.0590804	741873	0.119445	4.04961e+06	0.133026	870566	0.135142	1.26284e+06	0.103972	2.82092e+06	0.0879132	1.29242e+06
217-11	0.129859	1.34355e+06	0.0846017	1.6358e+06	0.164656	1.19398e+06	0.0861906	1.50299e+06	0.127777	4.3663e+06	0.13452	1.0886e+06	0.135634	1.01707e+06	0.111563	3.04151e+06	0.0950187	1.80252e+06
217-120	0.155927	841500	0.0835352	1.37396e+06	-1	-1	0.0690479	1.53873e+06	0.134208	3.49403e+06	0.132114	686617	0.141286	1.11817e+06	0.115764	2.60299e+06	0.100536	1.49023e+06
217-121	0.123474	1.35687e+06	0.0891757	1.88713e+06	-1	-1	0.055147	799601	0.117175	4.19681e+06	0.127454	988746	0.1306	1.28042e+06	0.106382	3.28323e+06	0.0983926	1.91507e+06
217-122	0.134782	1.1945e+06	0.0884031	2.27727e+06	0.138734	1.34208e+06	0.0806897	1.32788e+06	0.124972	4.15268e+06	0.121345	1.02065e+06	0.126397	1.54313e+06	0.113575	3.23379e+06	0.104099	2.6415e+06
217-123	0.135693	877208	0.085028	1.33848e+06	0.149202	946033	0.0513899	952780	0.137307	4.12738e+06	0.133004	854855	0.141925	1.075e+06	0.112868	2.816e+06	0.089637	1.26872e+06
217-124	0.124932	1.47785e+06	0.0917332	2.27163e+06	0.145054	1.15095e+06	0.0802368	1.33947e+06	0.126312	4.5916e+06	0.131028	1.05672e+06	0.134847	1.30133e+06	0.109758	3.23139e+06	0.105217	2.30438e+06
217-126	0.116921	1.29476e+06	0.0833566	1.85847e+06	-1	-1	0.0772855	1.3647e+06	0.104165	5.38884e+06	0.134025	1.37957e+06	0.125441	1.05838e+06	0.102093	3.64725e+06	0.0971555	1.65558e+06
217-127	0.12031	1.57559e+06	0.0789468	1.45985e+06	0.142505	1.23725e+06	0.0628851	1.19814e+06	0.125152	5.01679e+06	0.130952	1.20286e+06	0.130582	1.45887e+06	0.105365	3.29221e+06	0.0879512	1.67838e+06
217-128	0.127919	1.43771e+06	0.0853438	1.38832e+06	0.146544	1.09511e+06	0.0509765	889241	0.121936	3.98634e+06	0.130151	891802	0.136715	1.19783e+06	0.108317	2.95803e+06	0.0980725	1.57036e+06
217-129	0.121513	1.31248e+06	0.0930457	1.8611e+06	-1	-1	0.0719286	1.15141e+06	0.125153	4.85052e+06	0.140146	992856	0.142138	1.1034e+06	0.108751	2.9569e+06	0.103209	2.06212e+06
217-13	0.141959	760834	0.0845527	1.36125e+06	0.161698	861369	0.0730534	1.02912e+06	0.133754	3.66165e+06	0.133516	864312	0.135321	830697	0.122525	2.5741e+06	0.102701	1.49865e+06
217-130	0.131207	1.47422e+06	0.0869246	1.71356e+06	0.142701	1.22139e+06	0.0736917	1.21563e+06	0.128039	3.93653e+06	0.121107	865620	0.133412	1.32103e+06	0.116715	2.96536e+06	0.104834	2.26268e+06
217-131	0.129836	1.21042e+06	0.0849608	1.49068e+06	0.144911	952194	0.0574808	1.30586e+06	0.125603	4.25427e+06	0.124827	755660	0.13876	1.13294e+06	0.107769	3.08371e+06	0.0996387	1.51754e+06
217-132	0.13473	1.63005e+06	0.0868224	2.04911e+06	0.145532	1.03967e+06	0.0729715	1.35177e+06	0.126152	4.57381e+06	0.129004	877129	0.138639	1.37472e+06	0.11724	3.43974e+06	0.100059	1.97426e+06
217-133	0.128809	1.14463e+06	0.0879562	2.03294e+06	0.153602	1.25268e+06	0.0823991	1.587e+06	0.130191	4.56874e+06	0.140381	1.05126e+06	0.135503	937041	0.117722	3.2426e+06	0.0888781	1.57082e+06
217-14	0.118664	1.32109e+06	0.0898769	3.0537e+06	0.153241	1.40722e+06	0.0729012	1.29357e+06	0.11513	5.36516e+06	0.124816	1.06833e+06	0.123779	1.17639e+06	0.10632	3.7724e+06	0.0922821	1.80623e+06
217-15	0.121215	1.06446e+06	0.0851062	1.84786e+06	-1	-1	0.0614347	1.20197e+06	0.117654	4.54319e+06	0.131841	1.02592e+06	0.125739	1.00948e+06	0.103124	3.29598e+06	0.10499	1.94909e+06
217-16	0.140859	1.17129e+06	0.0855397	1.75877e+06	0.153309	1.20495e+06	0.0671759	876880	0.122429	4.23976e+06	0.129729	976935	0.134384	1.28585e+06	0.11211	3.00738e+06	0.103115	1.8624e+06
217-17	0.139918	1.10944e+06	0.0879403	1.67174e+06	0.153946	1.31468e+06	0.0713804	1.14046e+06	0.122123	4.69036e+06	0.124422	760558	0.133115	1.43529e+06	0.110307	3.10786e+06	0.0917434	1.58239e+06
217-18	0.12894	1.25574e+06	0.0849709	1.7669e+06	0.148399	1.37091e+06	0.0694398	1.20784e+06	0.116368	4.95234e+06	0.119585	838903	0.126436	1.58004e+06	0.108511	3.27918e+06	0.0910419	1.67697e+06
217-19	0.127717	1.20873e+06	0.0764115	1.23798e+06	-1	-1	0.0738843	1.24071e+06	0.114626	4.32788e+06	0.129328	1.05169e+06	0.124979	1.13236e+06	0.102598	3.38211e+06	0.0930999	1.6972e+06
217-21	0.123031	1.14236e+06	0.0804433	1.39593e+06	-1	-1	0.0558981	824761	0.112329	3.99098e+06	0.134369	1.05561e+06	0.132279	898972	0.100887	3.21437e+06	0.0894309	1.06902e+06
217-22	0.126193	1.49243e+06	0.0775448	1.3892e+06	0.151177	1.26248e+06	0.0641274	1.09334e+06	0.131585	4.57259e+06	0.126557	960341	0.133574	1.47053e+06	0.111621	2.9341e+06	0.0912481	1.69092e+06
217-24	0.136122	775047	0.0717331	955546	0.148832	1.22894e+06	0.068825	1.12183e+06	0.118826	4.16945e+06	0.125998	912377	0.131339	1.38139e+06	0.100407	2.50732e+06	0.104103	1.85131e+06
217-25	0.117625	906628	0.0761761	1.29019e+06	0.150399	1.3436e+06	0.0575906	890106	0.119826	4.53106e+06	0.135384	1.19935e+06	0.124613	990374	0.100634	2.91189e+06	0.0816608	1.21898e+06
217-26	0.130495	1.00763e+06	0.0881575	1.88365e+06	-1	-1	0.0669	720819	0.119793	4.4932e+06	0.130841	858137	0.137692	1.21093e+06	0.109033	3.1616e+06	0.0922937	1.42723e+06
217-27	0.132635	1.07233e+06	0.0860276	1.67467e+06	-1	-1	0.0851444	1.19759e+06	0.128517	4.27597e+06	0.133103	980749	0.136191	1.39145e+06	0.111086	3.07609e+06	0.102636	1.81055e+06
217-28	0.110019	1.82522e+06	0.0904529	2.63812e+06	-1	-1	0.0793092	1.29355e+06	0.116063	5.32758e+06	0.136562	973551	0.12881	1.50319e+06	0.101559	3.47383e+06	0.142964	1.34467e+06
217-29	0.116496	1.41111e+06	0.0889936	2.04995e+06	-1	-1	0.059525	926208	0.109882	4.46484e+06	0.129002	733284	0.130875	1.48883e+06	0.0980287	3.08566e+06	0.142775	1.30313e+06
217-3	0.12319	1.39606e+06	0.0858176	1.42511e+06	0.160743	1.00152e+06	0.0832194	1.23539e+06	0.123297	4.32874e+06	0.132223	921909	0.136048	1.36544e+06	0.110691	2.94766e+06	0.0990885	1.91347e+06
217-30	0.124182	1.19329e+06	0.093642	2.07309e+06	0.160589	1.08458e+06	0.0536481	898336	0.125119	4.14136e+06	0.126567	752392	0.131378	1.00473e+06	0.115834	2.68626e+06	0.12556	1.01777e+06
217-32	0.132208	1.10653e+06	0.0903491	1.68276e+06	0.157342	1.13496e+06	0.0577429	864147	0.121295	3.93293e+06	0.135547	808461	0.131604	1.02326e+06	0.106597	2.88775e+06	0.143389	1.17306e+06
217-33	0.135988	847935	0.088345	1.87554e+06	0.150772	1.24335e+06	0.0620503	1.55514e+06	0.131463	4.44995e+06	0.128475	1.04627e+06	0.130364	1.395e+06	0.114102	2.8875e+06	0.125062	1.00967e+06
217-34	0.110566	1.63837e+06	0.0906922	2.47426e+06	-1	-1	0.0665043	1.04774e+06	0.125733	5.18939e+06	0.123281	1.19008e+06	0.126127	1.69741e+06	0.11046	3.43798e+06	0.150681	1.79755e+06
217-35	0.121088	992446	0.0943478	2.12696e+06	0.162627	1.05906e+06	0.0912895	1.06512e+06	0.118476	3.76082e+06	0.137941	814929	0.13244	972310	0.103978	2.76026e+06	0.140024	1.1831e+06
217-36	0.130566	1.24419e+06	0.0859886	1.74645e+06	0.152234	1.07678e+06	0.0662614	2.1621e+06	0.133207	4.13171e+06	0.131154	1.0694e+06	0.134702	1.41552e+06	0.113981	2.84586e+06	0.127077	1.34819e+06
217-37	0.138168	1.02966e+06	0.0905623	1.77669e+06	0.150492	1.05493e+06	0.0599859	1.0024e+06	0.124848	4.56316e+06	0.120855	902225	0.132274	1.37325e+06	0.112197	2.70795e+06	0.140824	1.47615e+06
217-38	0.118621	1.19098e+06	0.0840023	1.62008e+06	-1	-1	0.0647629	888414	0.120382	4.57512e+06	0.128223	941912	0.130083	1.49499e+06	0.104918	2.89878e+06	0.138443	1.34226e+06
217-39	0.129582	1.7433e+06	0.1031	3.14398e+06	0.163267	1.04888e+06	0.0708382	1.20306e+06	0.124859	4.78671e+06	0.129385	827449	0.134906	987367	0.113071	3.5045e+06	0.151169	1.6886e+06
217-4	0.122508	1.23898e+06	0.0881854	2.27991e+06	0.158657	1.18988e+06	0.0684381	1.23804e+06	0.119972	5.02651e+06	0.131487	1.00634e+06	0.130797	1.04402e+06	0.113211	3.4903e+06	0.0977889	2.08976e+06
217-40	0.136056	772123	0.0890404	1.61691e+06	-1	-1	0.0650205	852424	0.130497	4.08437e+06	0.13853	755618	0.140068	1.3066e+06	0.107069	2.4519e+06	0.131969	871912
217-41	0.130038	896944	0.0848178	1.53673e+06	0.155443	761521	0.0553066	420516	0.116129	3.67515e+06	0.111857	447424	0.136553	1.04002e+06	0.100635	2.93351e+06	0.142468	955252
217-42	0.121791	1.2476e+06	0.0835023	1.81149e+06	0.151707	973222	0.0823227	1.20506e+06	0.115267	4.61214e+06	0.128234	730592	0.133075	1.29955e+06	0.1017	3.2539e+06	0.145786	1.36898e+06
217-43	0.149648	809292	0.0913932	1.66965e+06	0.159705	877607	0.0651281	937828	0.123821	3.25074e+06	0.123419	574942	0.140455	1.0404e+06	0.112427	2.6261e+06	0.132296	906317
217-44	0.123208	1.10372e+06	0.0799009	1.68217e+06	-1	-1	0.0604455	1.05973e+06	0.123462	4.72129e+06	0.125521	950648	0.134394	1.45296e+06	0.112181	3.04173e+06	0.143902	1.57845e+06
217-46	0.129192	1.07428e+06	0.0783727	1.4185e+06	0.152065	1.05802e+06	0.0655568	1.03995e+06	0.126194	4.37924e+06	0.127746	921095	0.132061	1.28438e+06	0.107001	2.98281e+06	0.130251	1.05088e+06
217-5	0.126002	1.19117e+06	0.0808092	1.78402e+06	-1	-1	0.0741816	1.27365e+06	0.124227	4.74787e+06	0.122906	1.01123e+06	0.128044	1.57431e+06	0.109017	3.13743e+06	0.0875178	1.52239e+06
217-51	0.14613	999759	0.080434	1.5217e+06	-1	-1	0.0678044	499737	0.120452	3.68511e+06	0.13645	681575	0.138614	880552	0.108999	2.9064e+06	0.14981	1.26922e+06
217-52	0.138036	1.44348e+06	0.0877778	1.99231e+06	-1	-1	0.0973622	1.4413e+06	0.124616	4.11685e+06	0.125854	654116	0.142409	1.17608e+06	0.111885	3.10018e+06	0.134093	1.21295e+06
217-53	0.128023	855106	0.0884913	1.79991e+06	-1	-1	0.0929144	1.06008e+06	0.118334	4.38678e+06	0.129592	911927	0.13275	1.42673e+06	0.104224	3.28866e+06	0.106461	1.22912e+06
217-55	0.132278	1.0893e+06	0.0911519	1.69695e+06	0.138959	1.04904e+06	0.0592493	1.09081e+06	0.127773	4.16525e+06	0.126822	826014	0.139637	1.3117e+06	0.110769	3.00721e+06	0.101832	1.31556e+06
217-56	0.144277	800463	0.0920577	1.44346e+06	0.136911	1.18216e+06	0.0804903	1.18238e+06	0.125724	3.98008e+06	0.130393	826024	0.13082	932717	0.1106	2.55141e+06	0.104647	1.38627e+06
217-57	0.117087	1.18113e+06	0.0867299	1.39326e+06	0.135677	1.21386e+06	0.0778611	1.21753e+06	0.119497	4.40939e+06	0.134186	1.03894e+06	0.128666	1.0132e+06	0.101638	3.16497e+06	0.102828	1.31971e+06
217-59	0.134813	1.07317e+06	0.0973995	1.56902e+06	-1	-1	0.0908753	1.29384e+06	0.129314	4.02557e+06	0.131093	843765	0.137932	1.41843e+06	0.112964	3.07901e+06	0.10931	1.5091e+06
217-6	0.125317	1.30722e+06	0.0828728	1.51786e+06	0.148474	1.03745e+06	0.0592795	1.21388e+06	0.129989	4.25167e+06	0.122974	981099	0.125353	1.50631e+06	0.120313	2.9726e+06	0.0869771	1.48847e+06
217-60	0.125515	1.2263e+06	0.0846132	1.61843e+06	-1	-1	0.0939396	1.10614e+06	0.130592	3.7729e+06	0.137914	774438	0.14143	1.27743e+06	0.111762	3.19057e+06	0.0923056	1.73237e+06
217-61	0.125842	1.35431e+06	0.0858123	1.73117e+06	-1	-1	0.0694636	1.05033e+06	0.120629	4.37084e+06	0.128595	968567	0.131495	1.04515e+06	0.104855	3.20759e+06	0.11251	1.7599e+06
217-62	0.125597	1.16242e+06	0.0881611	1.89058e+06	0.138891	1.19145e+06	0.0625867	1.13786e+06	0.120515	4.2504e+06	0.126213	921418	0.137565	1.57443e+06	0.112452	3.41839e+06	0.100209	1.45752e+06
217-63	0.13512	794554	0.101467	1.97888e+06	-1	-1	0.0756565	1.05125e+06	0.125033	4.3775e+06	0.134031	782496	0.143804	1.17261e+06	0.111417	2.81885e+06	0.118832	1.3532e+06
217-64	0.146419	770184	0.0871194	1.42993e+06	-1	-1	0.0651923	935789	0.126444	3.78454e+06	0.132006	680085	0.144949	1.21796e+06	0.109419	2.77863e+06	0.104015	1.17082e+06
217-65	0.130082	889764	0.0864871	1.66024e+06	-1	-1	0.0568435	1.1893e+06	0.124701	4.68523e+06	0.122369	882046	0.125172	1.4379e+06	0.115565	3.18403e+06	0.108279	1.70486e+06
217-66	0.123218	1.02541e+06	0.0866581	1.81517e+06	0.135281	1.32773e+06	0.0784446	1.33873e+06	0.123099	4.37921e+06	0.123321	957728	0.129996	1.60853e+06	0.112896	3.36241e+06	0.107691	1.69669e+06
217-67	0.144426	937385	0.090851	1.78771e+06	0.143444	923610	0.0861263	1.26459e+06	0.124742	3.97792e+06	0.127134	781862	0.139151	1.23134e+06	0.112711	2.99565e+06	0.111749	1.35479e+06
217-68	0.12391	1.1553e+06	0.0856325	1.24822e+06	-1	-1	0.0750847	1.11936e+06	0.122838	4.21067e+06	0.135868	993876	0.140495	1.2996e+06	0.106219	2.96424e+06	0.103548	1.08872e+06
217-69	0.125613	1.30047e+06	0.0837861	1.71279e+06	-1	-1	0.0851359	1.27937e+06	0.124565	4.80403e+06	0.128733	1.00395e+06	0.126837	1.2468e+06	0.112782	3.04744e+06	0.104888	1.61706e+06
217-7	0.144398	1.02769e+06	0.0959782	2.12998e+06	0.155385	1.01237e+06	0.0632324	1.26667e+06	0.130193	4.00512e+06	0.123818	767591	0.137656	1.23595e+06	0.117384	2.98358e+06	0.0829988	1.26749e+06
217-70	0.120377	1.50059e+06	0.0919624	2.12998e+06	-1	-1	0.0655038	976571	0.115215	4.68517e+06	0.128263	919106	0.126947	1.25841e+06	0.105103	3.86536e+06	0.11578	1.72382e+06
217-71	0.131352	1.53721e+06	0.0874957	1.90041e+06	0.145501	1.35718e+06	0.074005	1.40862e+06	0.126925	4.6189e+06	0.133878	982708	0.132856	1.17429e+06	0.12077	3.65992e+06	0.111389	2.22051e+06
217-72	0.135043	1.51759e+06	0.0858841	1.53244e+06	0.143286	1.2546e+06	0.0862078	1.53359e+06	0.124987	4.67788e+06	0.132254	1.10221e+06	0.136446	1.49018e+06	0.116845	3.37314e+06	0.0999357	1.57964e+06
217-73	0.121272	1.12681e+06	0.0798429	1.45587e+06	0.14126	1.07816e+06	0.0777939	1.12674e+06	0.120649	4.59372e+06	0.138239	1.15929e+06	0.133436	970433	0.109856	3.23817e+06	0.097877	903745
217-74	0.127647	1.15947e+06	0.0856268	1.63967e+06	0.137868	1.23668e+06	0.0683222	1.20075e+06	0.124154	4.65152e+06	0.12593	890455	0.130556	1.46456e+06	0.116328	3.27224e+06	0.105145	1.75124e+06
217-75	0.123176	1.39643e+06	0.0846046	1.63558e+06	-1	-1	0.0777187	1.19859e+06	0.125989	4.18312e+06	0.136413	844931	0.140109	1.32537e+06	0.114219	3.29337e+06	0.117853	1.89446e+06
217-77	0.142051	1.28117e+06	0.0879322	1.86114e+06	0.138766	1.1902e+06	0.0735372	1.35013e+06	0.119078	4.356e+06	0.128159	929907	0.126392	1.02223e+06	0.10681	3.25084e+06	0.0918528	1.67512e+06
217-78	0.142867	1.27304e+06	0.0854561	1.67894e+06	-1	-1	0.0613969	964511	0.12002	4.06416e+06	0.125711	963400	0.130203	1.34276e+06	0.109376	3.04193e+06	0.0913228	1.91447e+06
217-8	0.132575	1.16294e+06	0.0849883	1.73806e+06	-1	-1	0.0790055	843119	0.126977	3.74725e+06	0.141247	1.08258e+06	0.13839	1.04075e+06	0.108655	3.32866e+06	0.0896894	1.24868e+06
217-80	0.138452	1.12206e+06	0.092432	1.65142e+06	0.144338	1.38067e+06	0.0802735	1.28226e+06	0.133103	3.82453e+06	0.13429	1.13248e+06	0.135816	1.42857e+06	0.122708	2.92473e+06	0.098077	2.22192e+06
217-81	0.13404	1.34733e+06	0.0978194	2.12064e+06	-1	-1	0.0597146	1.01482e+06	0.121123	4.05205e+06	0.133145	1.10486e+06	0.126289	1.01765e+06	0.114535	2.94957e+06	0.10127	2.30031e+06
217-82	0.1407	1.49008e+06	0.0981849	2.80589e+06	0.138346	1.26849e+06	0.0871054	1.29816e+06	0.119498	4.41332e+06	0.119574	863446	0.129432	1.41223e+06	0.110556	3.19737e+06	0.0946984	1.96756e+06
217-83	0.133684	1.54031e+06	0.0955614	2.25121e+06	-1	-1	0.0669075	1.34884e+06	0.122348	3.98558e+06	0.129522	986805	0.134495	1.43375e+06	0.116134	3.15662e+06	0.0846281	1.84918e+06
217-84	0.123129	1.35461e+06	0.0913777	2.16299e+06	0.148278	1.40628e+06	0.0820794	1.06639e+06	0.125406	4.29941e+06	0.139413	1.17553e+06	0.117668	1.00539e+06	0.117773	3.02563e+06	0.0880761	2.12123e+06
217-85	0.130407	1.29382e+06	0.0747971	1.89198e+06	0.137946	1.14595e+06	0.0813491	1.10161e+06	0.119968	3.52699e+06	0.130992	998356	0.132125	1.37039e+06	0.109579	2.86324e+06	0.0975053	1.84368e+06
217-86	0.134771	1.23325e+06	0.09325	1.82622e+06	-1	-1	0.0778793	1.24661e+06	0.120652	3.81988e+06	0.129799	751718	0.135168	1.16816e+06	0.112668	2.69559e+06	0.092019	1.58636e+06
217-9	0.126782	951553	0.0709958	1.16894e+06	0.159623	966901	0.0545034	1.39222e+06	0.122621	4.05854e+06	0.133657	862318	0.13437	966529	0.108949	3.09619e+06	0.087765	1.34341e+06
218-1	0.110329	2.05306e+06	0.0833921	1.9228e+06	0.138696	1.16302e+06	0.0672282	1.28528e+06	0.080158	2.15116e+06	0.109613	831334	0.114238	1.108e+06	0.105544	3.06207e+06	0.0939181	2.26224e+06
218-10	0.12589	1.36982e+06	0.0777691	1.35626e+06	0.157629	962685	0.0693111	949221	0.087962	1.81823e+06	0.131886	823185	0.132586	978546	0.105071	2.81699e+06	0.096005	1.59893e+06
218-11	0.114838	2.07847e+06	0.0790268	1.62424e+06	0.159758	1.30312e+06	0.0886241	1.65214e+06	0.0862897	2.3466e+06	0.130371	1.05701e+06	0.129597	964432	0.113128	3.43979e+06	0.0981509	2.13409e+06
218-120	0.139915	1.2114e+06	0.0831402	1.23763e+06	-1	-1	0.0721696	1.231e+06	0.121972	3.62664e+06	0.138297	735046	0.138711	802878	0.108653	2.53578e+06	0.0906838	1.49194e+06
218-121	0.116163	1.87973e+06	0.0879816	1.74124e+06	-1	-1	0.0629267	1.1385e+06	0.0863069	2.10336e+06	0.123813	1.02336e+06	0.12514	1.16837e+06	0.105163	3.40873e+06	0.0983996	2.21721e+06
218-122	0.12405	1.72199e+06	0.0875283	2.23232e+06	0.139174	1.44122e+06	0.0831565	1.57851e+06	0.0855111	1.85526e+06	0.125879	1.10333e+06	0.123973	1.33539e+06	0.109948	3.5797e+06	0.102806	2.92559e+06
218-123	0.12184	1.28458e+06	0.0778223	1.10956e+06	0.148394	998384	0.0527181	981438	0.0874941	1.83159e+06	0.133385	818937	0.138579	872978	0.114277	2.95951e+06	0.0962552	1.58782e+06
218-124	0.112181	1.97345e+06	0.0905712	2.17461e+06	0.144164	1.30088e+06	0.0787965	1.31239e+06	0.123439	5.11429e+06	0.134914	1.09472e+06	0.132801	1.12641e+06	0.109725	3.27412e+06	0.106204	2.71224e+06
218-126	0.106744	1.78926e+06	0.0831351	1.77597e+06	-1	-1	0.0765425	1.26364e+06	0.0902308	2.2309e+06	0.133636	1.19714e+06	0.122489	1.02732e+06	0.103938	3.51457e+06	0.102759	1.98046e+06
218-127	0.112769	1.96399e+06	0.0765275	1.38673e+06	0.140833	1.29536e+06	0.0607087	1.33746e+06	0.123132	5.35809e+06	0.130034	1.1799e+06	0.127165	1.18637e+06	0.108245	3.5717e+06	0.0943918	1.8852e+06
218-128	0.117892	1.78768e+06	0.0782032	1.18418e+06	0.145612	1.16544e+06	0.0544338	984209	0.0867687	1.93896e+06	0.129897	958228	0.133375	1.05741e+06	0.108322	3.17267e+06	0.100236	1.82611e+06
218-129	0.112688	1.50282e+06	0.0930294	1.7821e+06	-1	-1	0.0772211	1.33905e+06	0.0892471	1.91197e+06	0.141112	844232	0.140873	767017	0.109751	2.92913e+06	0.104712	2.2043e+06
218-13	0.136036	1.09856e+06	0.0817479	1.36005e+06	0.152819	946807	0.0636885	993291	0.080142	1.9101e+06	0.120693	784626	0.128597	709907	0.115424	2.71777e+06	0.0950417	1.63172e+06
218-130	0.113814	1.95833e+06	0.0851987	1.61929e+06	0.140881	1.21322e+06	0.0806244	1.47637e+06	0.0862472	1.89573e+06	0.124261	852623	0.127629	1.20161e+06	0.112002	3.14106e+06	0.105424	2.63534e+06
218-131	0.119857	1.66839e+06	0.0831703	1.37246e+06	0.142282	922741	0.0633733	1.15204e+06	0.0828505	1.85361e+06	0.129422	925640	0.133782	894066	0.107025	3.11337e+06	0.100886	1.59135e+06
218-132	0.120954	2.11736e+06	0.0845919	1.6974e+06	0.144817	1.04874e+06	0.0771748	1.51912e+06	0.0919908	2.08135e+06	0.129712	892722	0.133486	1.15265e+06	0.116384	3.5538e+06	0.103104	2.29132e+06
218-133	0.113858	1.78733e+06	0.0861936	1.93427e+06	0.14819	1.23021e+06	0.0859819	1.73601e+06	0.12945	4.61579e+06	0.129677	1.11106e+06	0.125434	867958	0.116778	3.34748e+06	0.100553	1.76975e+06
218-14	0.112311	1.85452e+06	0.100287	3.48505e+06	0.142643	1.41112e+06	0.0712707	1.18545e+06	0.0824526	2.37839e+06	0.116336	1.08256e+06	0.114025	1.14923e+06	0.103462	3.83201e+06	0.0942506	2.24125e+06
218-15	0.111464	1.53101e+06	0.0884946	2.09475e+06	-1	-1	0.0560964	724143	0.0797788	2.19266e+06	0.121036	822117	0.116763	921288	0.101332	3.27569e+06	0.105251	2.35897e+06
218-16	0.113207	1.89559e+06	0.083897	1.85498e+06	0.146392	1.18956e+06	0.0641058	836171	0.0775292	1.86756e+06	0.122672	900299	0.126555	1.09445e+06	0.105425	3.14813e+06	0.102282	2.21028e+06
218-17	0.128324	1.59438e+06	0.0820207	1.72362e+06	0.156466	1.39605e+06	0.0773021	1.31885e+06	0.0863213	2.09222e+06	0.12634	877950	0.131111	1.19962e+06	0.110383	3.15145e+06	0.0956495	1.95457e+06
218-18	0.117675	1.83613e+06	0.0842453	1.68948e+06	0.14956	1.43342e+06	0.0753153	1.37428e+06	0.0860257	2.2872e+06	0.121606	944309	0.123876	1.35751e+06	0.109562	3.33009e+06	0.0950879	1.96373e+06
218-19	0.106863	1.7646e+06	0.0766305	1.39313e+06	-1	-1	0.0706175	1.06174e+06	0.0782279	2.0583e+06	0.119129	893185	0.118497	1.04399e+06	0.0986406	3.20607e+06	0.0964719	2.06996e+06
218-21	0.119406	1.40113e+06	0.0787898	1.22552e+06	-1	-1	0.0603483	1.01308e+06	0.113311	3.99439e+06	0.134433	965466	0.129326	756794	0.103319	3.04465e+06	0.0964753	1.28396e+06
218-22	0.114869	1.97665e+06	0.0705018	1.26509e+06	0.152102	1.40013e+06	0.0729455	1.304e+06	0.129272	5.16216e+06	0.12766	987727	0.131372	1.27495e+06	0.11446	3.36437e+06	0.0939162	2.19678e+06
218-24	0.129246	1.16051e+06	0.0731626	994506	0.148753	1.4135e+06	0.0733811	1.1859e+06	0.0820349	2.35579e+06	0.127885	1.05359e+06	0.126964	1.18854e+06	0.104906	2.8018e+06	0.10315	1.90079e+06
218-25	0.116262	1.43026e+06	0.070906	1.39295e+06	0.148116	1.36276e+06	0.0609543	1.12582e+06	0.11664	4.97547e+06	0.13311	1.06898e+06	0.12199	933532	0.103018	3.13018e+06	0.0929961	1.52769e+06
218-26	0.110001	1.83119e+06	0.0915663	2.56302e+06	-1	-1	0.0711847	853894	0.0861625	2.00699e+06	0.119214	701459	0.128059	966639	0.104724	3.42331e+06	0.0970799	1.88242e+06
218-27	0.122786	1.57727e+06	0.0813734	1.62996e+06	-1	-1	0.0872765	1.41717e+06	0.123356	4.33996e+06	0.133328	1.03868e+06	0.132642	1.09049e+06	0.111351	3.24382e+06	0.101661	2.19584e+06
218-28	0.104605	2.17388e+06	0.0906573	2.61634e+06	-1	-1	0.0820653	1.46671e+06	0.115281	4.94987e+06	0.13353	917829	0.123013	1.36301e+06	0.107225	3.3295e+06	0.152078	1.79546e+06
218-29	0.107047	1.81627e+06	0.0851063	2.0262e+06	-1	-1	0.0578602	925320	0.0851773	2.05622e+06	0.128108	808489	0.126865	1.32095e+06	0.10043	3.01968e+06	0.147075	1.66041e+06
218-3	0.113981	1.83643e+06	0.0829059	1.5615e+06	0.155337	1.23293e+06	0.0853153	1.4716e+06	0.0851712	2.14971e+06	0.123716	896004	0.130571	1.1252e+06	0.116371	3.07587e+06	0.100375	2.32684e+06
218-30	0.107221	1.89452e+06	0.0994087	2.20155e+06	0.1449	1.10376e+06	0.0647955	643438	0.0833109	1.70795e+06	0.115241	789716	0.12061	1.02346e+06	0.10973	2.87636e+06	0.118512	1.29154e+06
218-32	0.122855	1.52643e+06	0.0832678	1.67214e+06	0.155762	1.09874e+06	0.0677961	1.12189e+06	0.122375	4.18794e+06	0.125951	873753	0.126781	1.02601e+06	0.10914	2.86127e+06	0.144526	1.5016e+06
218-33	0.126334	1.33417e+06	0.0846053	1.79725e+06	0.150177	1.26036e+06	0.0632569	1.56633e+06	0.0857342	1.95949e+06	0.122468	1.30599e+06	0.124239	1.14677e+06	0.111516	3.0225e+06	0.13251	1.28773e+06
218-34	0.105722	2.08722e+06	0.0871194	2.22833e+06	-1	-1	0.0638504	1.05383e+06	0.0882046	2.19481e+06	0.12187	1.27715e+06	0.123109	1.45762e+06	0.108597	3.52872e+06	0.147796	1.97924e+06
218-35	0.119551	1.26789e+06	0.0933667	2.10988e+06	0.160851	1.02443e+06	0.0896277	1.27982e+06	0.0846278	1.81387e+06	0.131826	863375	0.128726	870622	0.107915	2.47268e+06	0.148397	1.52358e+06
218-36	0.123908	1.54068e+06	0.0825939	1.77695e+06	0.154069	1.16249e+06	0.0763175	1.44527e+06	0.0836281	1.86763e+06	0.130547	1.08715e+06	0.128277	1.15709e+06	0.119965	2.89359e+06	0.139807	1.55006e+06
218-37	0.122759	1.52276e+06	0.0880898	1.82774e+06	0.152693	1.13281e+06	0.0672793	1.26782e+06	0.0868994	1.80691e+06	0.123787	942524	0.126472	1.14392e+06	0.114193	2.71569e+06	0.150591	1.74024e+06
218-38	0.10316	1.87797e+06	0.0803578	1.75906e+06	-1	-1	0.0669675	1.36576e+06	0.0852399	1.86787e+06	0.131603	1.0787e+06	0.125241	1.37663e+06	0.104906	2.95072e+06	0.142566	1.65688e+06
218-39	0.112796	2.17044e+06	0.103655	3.33898e+06	0.139746	1.1044e+06	0.0732612	973356	0.0835737	1.87565e+06	0.110157	724672	0.122178	924800	0.107158	3.22751e+06	0.15007	1.93322e+06
218-4	0.108859	1.64519e+06	0.087755	2.24946e+06	0.153108	1.13514e+06	0.0657587	1.22102e+06	0.118585	5.08187e+06	0.121016	878700	0.124819	968668	0.107875	3.34026e+06	0.0977041	2.34018e+06
218-40	0.125228	1.03362e+06	0.0839659	1.54741e+06	-1	-1	0.065647	973308	0.0832382	1.658e+06	0.133789	649825	0.137289	969343	0.10358	2.39736e+06	0.142016	1.19231e+06
218-41	0.117361	1.24371e+06	0.0810905	1.54826e+06	0.149266	725084	0.0674138	647940	0.0849678	1.75509e+06	0.103086	407480	0.13085	746761	0.102458	2.78524e+06	0.130724	1.0263e+06
218-42	0.108448	1.89217e+06	0.0805943	1.87189e+06	0.153412	901075	0.0836428	1.43017e+06	0.0830307	1.83848e+06	0.126843	788675	0.13045	955911	0.103563	3.2593e+06	0.148341	1.65673e+06
218-43	0.138919	1.31833e+06	0.0928127	1.74274e+06	0.146875	817869	0.0691953	767733	0.0809372	1.54776e+06	0.11459	652118	0.13072	757394	0.109055	2.62539e+06	0.13065	1.19711e+06
218-44	0.111862	1.61788e+06	0.0765512	1.78945e+06	-1	-1	0.0632987	1.17152e+06	0.08914	2.1233e+06	0.12723	979483	0.129136	1.24139e+06	0.109339	3.26655e+06	0.146675	1.85595e+06
218-46	0.11699	1.57654e+06	0.0750636	1.498e+06	0.153606	1.07299e+06	0.0653831	1.26096e+06	0.0832773	1.984e+06	0.125572	1.00596e+06	0.126132	1.074e+06	0.106179	3.25083e+06	0.125495	1.23957e+06
218-5	0.111273	1.65481e+06	0.0768102	1.78194e+06	-1	-1	0.0812133	1.60258e+06	0.0841132	2.12721e+06	0.124567	1.07673e+06	0.123956	1.31495e+06	0.10871	3.36856e+06	0.0917588	1.90323e+06
218-51	0.130879	1.36615e+06	0.076204	1.39912e+06	-1	-1	0.076564	735135	0.114543	3.99385e+06	0.125957	567359	0.133047	726294	0.106961	3.08241e+06	0.149725	1.36519e+06
218-52	0.118913	1.87992e+06	0.0853911	2.27644e+06	-1	-1	0.0869189	1.33917e+06	0.085078	1.85222e+06	0.111592	640198	0.129397	968405	0.104905	2.77232e+06	0.132402	1.49061e+06
218-53	0.114518	1.36777e+06	0.0863815	1.90735e+06	-1	-1	0.0950387	1.20118e+06	0.118108	4.24885e+06	0.117856	631384	0.136703	1.27177e+06	0.105067	3.16473e+06	0.107332	1.46365e+06
218-55	0.124441	1.75319e+06	0.0890626	1.64468e+06	0.140251	1.17825e+06	0.0621891	1.14442e+06	0.0839912	1.90752e+06	0.13026	1.0215e+06	0.140945	1.074e+06	0.112902	2.93282e+06	0.105275	1.75114e+06
218-56	0.138365	1.18716e+06	0.0858469	1.28286e+06	0.137437	1.20393e+06	0.082535	1.36857e+06	0.0910063	1.92405e+06	0.124005	845667	0.135982	885408	0.116654	2.72938e+06	0.10644	1.95745e+06
218-57	0.108256	1.84927e+06	0.0867557	1.62639e+06	0.136322	1.19234e+06	0.0806804	1.28237e+06	0.087537	1.83796e+06	0.129685	986042	0.134903	971309	0.103539	3.41421e+06	0.109371	1.83434e+06
218-59	0.123457	1.48226e+06	0.0971577	1.51652e+06	-1	-1	0.097643	1.4804e+06	0.0894684	1.65333e+06	0.133807	871435	0.143641	1.0526e+06	0.11801	2.90843e+06	0.111012	1.67176e+06
218-6	0.112863	1.85209e+06	0.0795978	1.74102e+06	0.143273	1.11552e+06	0.0526182	1.07126e+06	0.0838948	1.96089e+06	0.116432	933673	0.120838	1.28361e+06	0.111322	3.04987e+06	0.0954465	1.97776e+06
218-60	0.119312	1.62549e+06	0.092612	1.64867e+06	-1	-1	0.0932677	1.23919e+06	0.0894527	1.78957e+06	0.132694	638376	0.146586	913974	0.112681	2.9486e+06	0.111578	1.94594e+06
218-61	0.111793	2.06703e+06	0.0856886	1.80719e+06	-1	-1	0.0801196	1.31167e+06	0.116958	4.4965e+06	0.124538	933951	0.13305	920652	0.104415	3.32489e+06	0.11271	2.26722e+06
218-62	0.115812	1.58754e+06	0.0862941	1.67471e+06	0.137141	1.17285e+06	0.0679118	1.19108e+06	0.0844805	1.83804e+06	0.12507	950676	0.142756	1.25829e+06	0.110022	3.3643e+06	0.104353	1.69612e+06
218-63	0.122512	1.48796e+06	0.10276	2.28065e+06	-1	-1	0.0742925	945696	0.084748	1.84869e+06	0.120857	716429	0.129133	906268	0.108102	2.89703e+06	0.105583	1.37114e+06
218-64	0.120905	1.08337e+06	0.0813577	1.3476e+06	-1	-1	0.0658821	1.02366e+06	0.0888442	1.77265e+06	0.130286	639563	0.147354	943296	0.109517	2.73958e+06	0.0994753	1.37057e+06
218-65	0.120994	1.53427e+06	0.0896822	1.89601e+06	-1	-1	0.0605128	1.04246e+06	0.0798101	2.22216e+06	0.11558	886507	0.119603	1.1858e+06	0.109278	3.07678e+06	0.108077	2.1709e+06
218-66	0.113022	1.83496e+06	0.0874366	1.92564e+06	0.136587	1.50279e+06	0.0848981	1.43246e+06	0.0936828	2.19764e+06	0.126731	1.08375e+06	0.125934	1.39181e+06	0.111111	3.48408e+06	0.109256	1.96744e+06
218-67	0.127238	1.35048e+06	0.0894851	1.60772e+06	0.141734	940357	0.0877706	1.30829e+06	0.0906318	1.68195e+06	0.126475	798020	0.135142	1.00472e+06	0.112886	2.94391e+06	0.108643	1.66533e+06
218-68	0.111639	1.44679e+06	0.0835155	1.13207e+06	-1	-1	0.0771323	1.25032e+06	0.0870823	2.02376e+06	0.130715	805852	0.138749	1.02929e+06	0.111109	2.86268e+06	0.106682	1.45642e+06
218-69	0.108787	1.95457e+06	0.0824476	1.71474e+06	-1	-1	0.083854	1.34976e+06	0.0913338	2.06572e+06	0.124843	944110	0.124845	1.23522e+06	0.120028	3.09236e+06	0.107804	1.95991e+06
218-7	0.123193	1.58128e+06	0.0975929	2.44486e+06	0.146345	1.01817e+06	0.0596147	895949	0.0785266	1.97596e+06	0.111896	684880	0.126352	941066	0.11153	2.84299e+06	0.0895991	1.40352e+06
218-70	0.111944	1.84036e+06	0.0911921	2.25247e+06	-1	-1	0.0765562	1.11152e+06	0.0885837	2.20993e+06	0.121471	776389	0.125986	1.18709e+06	0.108667	3.47608e+06	0.116153	1.9913e+06
218-71	0.11832	2.05625e+06	0.0885634	1.73925e+06	0.145899	1.34305e+06	0.083823	1.55853e+06	0.126527	4.88606e+06	0.129829	863971	0.131256	1.09901e+06	0.120562	3.46089e+06	0.11268	2.35286e+06
218-72	0.112287	2.21482e+06	0.0899224	1.59118e+06	0.141482	1.22075e+06	0.0860099	1.52023e+06	0.0876501	2.01942e+06	0.125002	976914	0.128182	1.18185e+06	0.112116	3.22469e+06	0.0982212	1.60354e+06
218-73	0.107475	1.37699e+06	0.0771951	1.175e+06	0.137592	1.06885e+06	0.0768171	1.18659e+06	0.121222	4.24644e+06	0.133553	1.01253e+06	0.126128	887866	0.112204	3.26278e+06	0.105147	1.39568e+06
218-74	0.117238	1.38909e+06	0.085352	1.59461e+06	0.136001	1.13642e+06	0.0713237	1.27912e+06	0.122069	4.88766e+06	0.126762	922839	0.128235	1.11813e+06	0.115138	3.0823e+06	0.106271	2.03067e+06
218-75	0.107361	1.93348e+06	0.0853022	1.62582e+06	-1	-1	0.0849912	1.29712e+06	0.0949911	1.73824e+06	0.136656	871444	0.136232	1.051e+06	0.114374	3.30447e+06	0.115966	2.35393e+06
218-77	0.125949	1.87405e+06	0.087268	1.71801e+06	0.138835	1.27303e+06	0.0775795	1.23684e+06	0.114571	4.36509e+06	0.126272	989812	0.123937	953526	0.107313	3.23822e+06	0.0927781	2.07596e+06
218-78	0.119624	1.72342e+06	0.0897013	1.62353e+06	-1	-1	0.0710087	985124	0.0799889	1.88763e+06	0.120658	900587	0.121362	1.19017e+06	0.105153	2.88115e+06	0.0903209	2.44371e+06
218-8	0.11885	1.54927e+06	0.0830434	1.77784e+06	-1	-1	0.0855668	1.22162e+06	0.0872069	1.67297e+06	0.139143	1.00481e+06	0.134625	1.07886e+06	0.11139	3.19198e+06	0.0972661	1.52642e+06
218-80	0.117787	1.84779e+06	0.0899965	1.66446e+06	0.144435	1.59389e+06	0.0812118	1.56731e+06	0.0922175	1.81705e+06	0.13512	1.15029e+06	0.131202	1.20811e+06	0.121268	3.24804e+06	0.0985807	2.80116e+06
218-81	0.116576	1.84781e+06	0.101671	2.4894e+06	-1	-1	0.0726724	1.05574e+06	0.0832334	1.87695e+06	0.122681	839230	0.112593	866418	0.108796	2.89433e+06	0.0962225	2.72268e+06
218-82	0.118203	1.86748e+06	0.0991347	2.55829e+06	0.131354	1.39476e+06	0.0793962	1.13912e+06	0.0829421	1.82948e+06	0.115593	949046	0.119794	1.23882e+06	0.106689	3.04722e+06	0.0934829	2.23902e+06
218-83	0.120243	2.10488e+06	0.0934181	2.02549e+06	0.0860229	449205	0.0748322	1.56802e+06	0.118752	3.81851e+06	0.126115	1.00591e+06	0.128909	1.23667e+06	0.114894	3.33674e+06	0.0879399	2.40271e+06
218-84	0.11338	1.779e+06	0.0946933	2.20067e+06	0.146872	1.54073e+06	0.0773418	1.22266e+06	0.09857	2.10554e+06	0.137866	1.14679e+06	0.126127	958417	0.120587	3.16897e+06	0.0914721	2.53411e+06
218-85	0.109492	1.914e+06	0.0778431	1.50814e+06	0.135044	1.30673e+06	0.0700196	1.37284e+06	0.0821991	1.74218e+06	0.130271	1.06646e+06	0.128124	1.1991e+06	0.109716	2.88292e+06	0.0927694	2.05698e+06
218-86	0.114942	1.76146e+06	0.0956492	1.79966e+06	-1	-1	0.0767961	1.04321e+06	0.0862256	1.5903e+06	0.120814	823896	0.125639	1.00152e+06	0.109607	2.70141e+06	0.0881376	2.04359e+06
218-9	0.109504	1.42725e+06	0.0739226	1.41821e+06	0.147019	1.02101e+06	0.0540385	778552	0.0807516	1.9883e+06	0.118387	809265	0.125254	946056	0.103333	2.93061e+06	0.0918646	1.65493e+06
219-1	0.131197	1.65667e+06	0.0943371	2.0274e+06	0.141563	1.03709e+06	0.0627664	948770	0.0787252	2.21865e+06	0.109036	768782	0.120189	1.01207e+06	0.110335	3.01111e+06	0.0977975	1.98056e+06
219-10	0.145003	1.40321e+06	0.0925089	1.31305e+06	0.163739	869649	0.0685271	791422	0.0883301	1.38433e+06	0.138723	922860	0.136842	970634	0.10767	2.79693e+06	0.0919309	1.24415e+06
219-11	0.130561	1.68608e+06	0.091079	1.75136e+06	0.165096	1.01979e+06	0.0892484	1.30518e+06	0.0841587	1.93002e+06	0.129524	921273	0.137227	857172	0.117028	3.26304e+06	0.0987361	1.67416e+06
219-120	0.169689	935288	0.093626	1.33376e+06	-1	-1	0.074153	1.08929e+06	0.117665	2.58491e+06	0.135408	555911	0.145376	759767	0.111985	2.43056e+06	0.100524	1.24188e+06
219-121	0.132136	1.60225e+06	0.100745	1.78253e+06	-1	-1	0.0631253	688073	0.0816919	1.7166e+06	0.132681	909454	0.134668	917603	0.106775	3.22203e+06	0.1019	1.83178e+06
219-122	0.143998	1.60646e+06	0.0993191	2.2819e+06	0.140711	1.06203e+06	0.086801	1.18747e+06	0.083444	1.61261e+06	0.129734	1.02057e+06	0.131116	1.02804e+06	0.110908	3.31168e+06	0.108977	2.59335e+06
219-123	0.143383	1.21618e+06	0.093904	1.17894e+06	0.151437	828919	0.0519177	1.30951e+06	0.0866837	1.46605e+06	0.133067	674640	0.146803	768995	0.113503	2.77357e+06	0.0955033	1.22786e+06
219-124	0.133721	1.65465e+06	0.101329	2.29619e+06	0.145143	989648	0.0783997	989413	0.120637	4.74136e+06	0.138439	909833	0.137642	974857	0.10884	3.11204e+06	0.107623	2.29668e+06
219-126	0.121655	1.64259e+06	0.0946875	1.897e+06	-1	-1	0.0771622	980439	0.0868039	1.81175e+06	0.136798	1.28125e+06	0.131188	916651	0.104553	3.60713e+06	0.103563	1.63138e+06
219-127	0.134754	1.69087e+06	0.0905019	1.49865e+06	0.142421	995943	0.0622665	1.35442e+06	0.125153	4.53765e+06	0.133805	1.03631e+06	0.136721	976230	0.110583	3.36988e+06	0.0924112	1.48937e+06
219-128	0.138749	1.44396e+06	0.0983085	983135	0.149972	871072	0.0568125	546639	0.0854968	1.49202e+06	0.131446	719254	0.145609	789673	0.109504	2.76315e+06	0.103343	1.39044e+06
219-129	0.134252	1.38255e+06	0.102272	1.76354e+06	-1	-1	0.0892122	1.03865e+06	0.0867782	1.48476e+06	0.141576	671562	0.145201	767382	0.110067	3.02014e+06	0.110416	2.11889e+06
219-13	0.156512	985131	0.0958114	1.33727e+06	0.158892	689049	0.0643471	679192	0.0804764	1.4844e+06	0.120681	691088	0.135656	674230	0.118436	2.26579e+06	0.106994	1.22247e+06
219-130	0.13829	1.72893e+06	0.100442	1.8649e+06	0.146316	1.00485e+06	0.0826071	1.25234e+06	0.0863053	1.52756e+06	0.128584	715980	0.13746	981825	0.112698	3.06091e+06	0.110271	2.2915e+06
219-131	0.14822	1.46558e+06	0.0951592	1.38381e+06	0.146494	760356	0.074514	890440	0.0837107	1.5531e+06	0.12665	571201	0.142412	809402	0.109585	2.89496e+06	0.100794	1.34917e+06
219-132	0.149586	1.87354e+06	0.097207	2.08823e+06	0.148231	896714	0.0766682	1.20884e+06	0.0861672	1.89783e+06	0.129402	666832	0.139732	1.00971e+06	0.118048	3.51554e+06	0.108911	2.01392e+06
219-133	0.138798	1.40591e+06	0.0966619	2.20405e+06	0.153987	982439	0.0838419	1.73295e+06	0.130233	4.10772e+06	0.141693	938061	0.136467	763116	0.117637	3.16619e+06	0.0981447	1.48294e+06
219-14	0.125376	1.71216e+06	0.0979394	3.21867e+06	0.146078	1.15399e+06	0.0627061	763681	0.0808955	2.38942e+06	0.107428	733603	0.122223	1.02026e+06	0.104547	3.53672e+06	0.0965807	1.61543e+06
219-15	0.13534	1.4e+06	0.091185	2.26745e+06	-1	-1	0.0438325	871713	0.0792887	2.13317e+06	0.114461	646230	0.122955	841151	0.103346	2.98876e+06	0.107206	1.92123e+06
219-16	0.142316	1.46018e+06	0.0938234	2.10407e+06	0.146594	1.02727e+06	0.0730254	645715	0.075113	1.77517e+06	0.119788	623804	0.131752	972414	0.108725	2.92449e+06	0.104688	1.80839e+06
219-17	0.155802	1.37393e+06	0.103967	1.5118e+06	0.158848	1.08748e+06	0.0722025	1.2546e+06	0.0864486	1.80055e+06	0.128714	603779	0.138631	982246	0.114677	2.91291e+06	0.093018	1.2257e+06
219-18	0.141993	1.57292e+06	0.092105	1.77586e+06	0.15024	1.25481e+06	0.0719447	1.19985e+06	0.0841076	1.95123e+06	0.119	695855	0.127315	1.13735e+06	0.115231	3.00889e+06	0.0948814	1.38288e+06
219-19	0.13257	1.46066e+06	0.0858558	1.84518e+06	-1	-1	0.0648033	795491	0.0767181	2.06092e+06	0.114247	670018	0.124633	914574	0.102487	2.96407e+06	0.099573	1.62383e+06
219-21	0.131896	1.33292e+06	0.0908942	1.29032e+06	-1	-1	0.0650623	389188	0.110883	2.81665e+06	0.132122	816518	0.135288	747971	0.105304	2.84483e+06	0.0909379	887523
219-22	0.141829	1.59534e+06	0.0888206	1.21104e+06	0.154187	1.02323e+06	0.0608742	1.19315e+06	0.124204	3.9513e+06	0.126531	800193	0.139168	995280	0.115089	2.72725e+06	0.0961359	1.53034e+06
219-24	0.147032	953895	0.0741243	1.08684e+06	0.149152	1.11353e+06	0.0755222	803113	0.0887835	1.77563e+06	0.118351	694101	0.131511	1.02045e+06	0.106808	2.34272e+06	0.112749	1.76596e+06
219-25	0.130968	1.18324e+06	0.0868322	1.20587e+06	0.152661	1.12103e+06	0.0648412	1.00503e+06	0.119123	3.64552e+06	0.137649	1.02152e+06	0.134772	723073	0.103994	2.68899e+06	0.0850574	823924
219-26	0.127501	1.45378e+06	0.0984834	2.55238e+06	-1	-1	0.0642027	578221	0.0849021	1.90562e+06	0.122165	591307	0.133481	805254	0.107821	2.95564e+06	0.0985811	1.47263e+06
219-27	0.152317	1.22418e+06	0.0966324	1.52634e+06	-1	-1	0.0903446	1.1315e+06	0.125834	3.42584e+06	0.136019	909512	0.141835	889537	0.110656	2.88258e+06	0.104116	1.4026e+06
219-28	0.11692	1.92025e+06	0.0971036	2.65782e+06	-1	-1	0.0872023	1.1784e+06	0.105844	3.7569e+06	0.138455	878935	0.130965	1.16038e+06	0.102497	3.30952e+06	0.155387	1.43913e+06
219-29	0.123643	1.74499e+06	0.0978568	1.94127e+06	-1	-1	0.0592521	775090	0.0832674	1.79242e+06	0.133801	543945	0.131773	1.23103e+06	0.101527	2.89378e+06	0.147983	1.15766e+06
219-3	0.126216	1.4991e+06	0.0980815	1.47232e+06	0.163865	963425	0.0904569	1.07678e+06	0.081739	1.78276e+06	0.126393	717385	0.137512	981622	0.116789	2.73532e+06	0.107539	1.71885e+06
219-30	0.129735	1.43005e+06	0.106752	2.07841e+06	0.150971	829724	0.0698903	668585	0.0841986	1.36329e+06	0.101082	505528	0.133681	816928	0.111003	2.40319e+06	0.126439	973031
219-32	0.150878	1.05917e+06	0.0976972	1.62968e+06	0.165301	854317	0.0658134	886529	0.107809	2.79065e+06	0.132226	456312	0.137737	899598	0.106126	2.70933e+06	0.147754	1.05547e+06
219-33	0.141726	1.09161e+06	0.096573	1.60009e+06	0.152447	1.05266e+06	0.0722237	1.20675e+06	0.0836295	1.55811e+06	0.12536	784872	0.130304	1.04221e+06	0.11446	2.5734e+06	0.13372	942713
219-34	0.117823	1.9135e+06	0.097533	2.21927e+06	-1	-1	0.0592222	1.02552e+06	0.0868758	1.8347e+06	0.123525	835819	0.130217	1.22255e+06	0.110246	3.1038e+06	0.154485	1.56539e+06
219-35	0.133186	1.11682e+06	0.104485	1.96896e+06	0.166786	869596	0.0864097	937265	0.0862155	1.3066e+06	0.135245	553920	0.139335	787225	0.108953	2.56798e+06	0.145541	1.01129e+06
219-36	0.148653	1.29574e+06	0.0993934	1.79885e+06	0.159101	852471	0.0794853	1.02022e+06	0.0781174	1.44892e+06	0.129525	834680	0.137367	956146	0.125301	2.40158e+06	0.13893	1.24623e+06
219-37	0.143691	1.22282e+06	0.101448	1.92984e+06	0.154435	998226	0.0626335	940858	0.0853114	1.46857e+06	0.11717	688552	0.133011	1.00871e+06	0.11495	2.6043e+06	0.149819	1.47932e+06
219-38	0.125814	1.44231e+06	0.0966845	1.78966e+06	-1	-1	0.0693472	963200	0.0819024	1.38696e+06	0.131205	553985	0.131495	1.16686e+06	0.106422	2.86162e+06	0.145663	1.21786e+06
219-39	0.12709	1.78574e+06	0.105065	3.27078e+06	0.140246	1.34126e+06	0.0754914	866475	0.0838664	1.8325e+06	0.093241	544822	0.129682	759471	0.108861	2.97978e+06	0.160676	1.75558e+06
219-4	0.128639	1.50168e+06	0.0966956	2.25669e+06	0.158485	890627	0.0586216	912766	0.120771	4.63519e+06	0.118948	718789	0.13108	805070	0.111975	3.09102e+06	0.103292	2.04271e+06
219-40	0.146826	1.03186e+06	0.0977842	1.56294e+06	-1	-1	0.0661928	1.1107e+06	0.0858906	1.42548e+06	0.141111	619484	0.139595	972545	0.109871	2.56986e+06	0.143576	1.02369e+06
219-41	0.138586	1.16306e+06	0.090389	1.48685e+06	0.156443	709468	0.072763	482206	0.0879066	1.42962e+06	0.116153	437788	0.137874	837760	0.107636	2.67694e+06	0.139521	793334
219-42	0.145772	1.48734e+06	0.0956027	1.8875e+06	0.162286	784506	0.0838051	1.1413e+06	0.0896635	1.56649e+06	0.132416	634625	0.139714	761408	0.104591	3.17629e+06	0.14724	1.40365e+06
219-43	0.161239	1.10965e+06	0.101349	1.61591e+06	0.150393	659744	0.0649754	499886	0.0838154	1.20032e+06	0.115403	371463	0.141754	581934	0.111348	2.37159e+06	0.133512	784195
219-44	0.133591	1.50328e+06	0.0877975	1.87949e+06	-1	-1	0.0589036	1.2063e+06	0.0842531	1.96112e+06	0.117921	736699	0.13237	1.22255e+06	0.113592	3.18743e+06	0.147906	1.72595e+06
219-46	0.142266	1.47326e+06	0.0847513	1.31249e+06	0.156657	813269	0.0621196	976879	0.0852721	1.53346e+06	0.119253	605492	0.134514	825069	0.109996	2.9446e+06	0.127439	899858
219-5	0.139481	1.42292e+06	0.0906014	1.70603e+06	-1	-1	0.0893565	1.15045e+06	0.080118	1.75883e+06	0.126103	897137	0.128953	1.11063e+06	0.11249	3.09726e+06	0.0901725	1.32496e+06
219-51	0.159097	1.29718e+06	0.0847693	1.49973e+06	-1	-1	0.074583	567649	0.114946	3.08062e+06	0.133505	497138	0.143096	627604	0.10934	2.84817e+06	0.153789	1.14797e+06
219-52	0.139032	1.55482e+06	0.0954755	2.30776e+06	-1	-1	0.0838355	1.04535e+06	0.0834118	1.71463e+06	0.104907	422307	0.133316	806128	0.110771	2.71483e+06	0.141552	1.28269e+06
219-53	0.133775	1.10101e+06	0.0943921	1.87347e+06	-1	-1	0.0924292	881446	0.115684	3.33925e+06	0.131324	1.14226e+06	0.150825	1.0983e+06	0.105507	3.38418e+06	0.106169	1.04814e+06
219-55	0.144721	1.3982e+06	0.103642	1.49886e+06	0.144813	879577	0.0601961	790756	0.0789851	1.48707e+06	0.129266	666469	0.153611	822578	0.114004	2.78786e+06	0.104404	1.07418e+06
219-56	0.162232	1.04967e+06	0.104575	1.1651e+06	0.142692	973288	0.0878549	1.07295e+06	0.0919526	1.63054e+06	0.130744	666125	0.136425	655696	0.118163	2.5269e+06	0.105534	1.11725e+06
219-57	0.12685	1.51859e+06	0.09723	1.56934e+06	0.142195	1.08935e+06	0.0875644	1.07258e+06	0.0908023	1.43582e+06	0.137024	898556	0.138617	783309	0.106647	3.32195e+06	0.106172	1.1427e+06
219-59	0.143794	1.63555e+06	0.104159	1.5093e+06	-1	-1	0.0979077	1.23371e+06	0.095197	1.43677e+06	0.134331	776404	0.141771	1.004e+06	0.118953	2.84051e+06	0.116737	1.33365e+06
219-6	0.132039	1.55044e+06	0.0958344	1.63081e+06	0.135775	791432	0.0514527	805795	0.0805049	1.88583e+06	0.113206	714823	0.126056	1.01227e+06	0.113506	2.7357e+06	0.100891	1.6531e+06
219-60	0.138366	1.49193e+06	0.104587	1.47315e+06	-1	-1	0.100226	905847	0.0922106	1.45376e+06	0.139412	716947	0.141812	880897	0.111831	2.77392e+06	0.116383	1.55163e+06
219-61	0.13853	1.58349e+06	0.0984347	1.82702e+06	-1	-1	0.0775411	981168	0.115042	3.41317e+06	0.128335	675771	0.14366	849906	0.107061	3.20187e+06	0.115269	1.65389e+06
219-62	0.137478	1.42077e+06	0.0990346	1.78589e+06	0.142787	1.00489e+06	0.0643996	1.05887e+06	0.0830714	1.7329e+06	0.128161	730573	0.141947	1.21066e+06	0.111766	3.29169e+06	0.104716	1.27783e+06
219-63	0.142702	1.27211e+06	0.108905	2.05745e+06	-1	-1	0.0636776	686866	0.0827443	1.80383e+06	0.117131	548986	0.137543	795388	0.110431	2.60371e+06	0.114558	1.14571e+06
219-64	0.142203	945475	0.0957309	1.32885e+06	-1	-1	0.0605386	788830	0.0909448	1.56825e+06	0.136473	591607	0.147152	898496	0.11226	2.78723e+06	0.105633	1.00631e+06
219-65	0.142495	1.4292e+06	0.0942853	1.88297e+06	-1	-1	0.0551244	671354	0.0820948	1.99368e+06	0.114316	692479	0.125376	998689	0.110437	3.0507e+06	0.112442	1.8051e+06
219-66	0.136862	1.35487e+06	0.0974463	1.76351e+06	0.138326	1.08984e+06	0.0813039	1.05447e+06	0.08993	1.76267e+06	0.130403	901988	0.134672	1.1361e+06	0.113157	3.28423e+06	0.10916	1.26427e+06
219-67	0.154229	1.15729e+06	0.0991366	1.47842e+06	0.14583	722037	0.0775065	868809	0.0972846	1.49289e+06	0.127174	607522	0.140682	863066	0.115548	2.7269e+06	0.117713	1.39909e+06
219-68	0.130723	1.43744e+06	0.0962329	1.07169e+06	-1	-1	0.0751068	941781	0.0880218	1.77718e+06	0.139404	844643	0.144144	928282	0.108671	2.92941e+06	0.108498	1.09436e+06
219-69	0.139414	1.56392e+06	0.0921082	1.87946e+06	-1	-1	0.0860789	1.06099e+06	0.0910763	1.75243e+06	0.131994	851516	0.131754	1.13707e+06	0.11514	3.10656e+06	0.108107	1.45454e+06
219-7	0.145973	1.33347e+06	0.103301	2.24946e+06	0.15304	773738	0.0586817	674053	0.078357	1.69853e+06	0.10863	577494	0.131392	838936	0.116405	2.67601e+06	0.0920563	1.06018e+06
219-70	0.132572	1.87036e+06	0.0998551	2.05171e+06	-1	-1	0.0724861	848313	0.0893069	2.01921e+06	0.124864	583615	0.133454	1.10768e+06	0.104347	3.50146e+06	0.117168	1.59745e+06
219-71	0.136169	1.79618e+06	0.0968183	1.93328e+06	0.146823	1.09284e+06	0.0792972	1.26167e+06	0.126242	4.4824e+06	0.127036	699259	0.138854	992950	0.121014	3.47045e+06	0.113247	2.07385e+06
219-72	0.133613	1.65053e+06	0.0992403	1.61065e+06	0.139632	829909	0.0760519	1.07362e+06	0.0845445	1.80734e+06	0.120969	745192	0.133929	949228	0.116051	2.85916e+06	0.101932	1.20828e+06
219-73	0.126711	1.1857e+06	0.0891808	1.40865e+06	0.147226	842413	0.0748452	930498	0.114636	3.4876e+06	0.13707	811841	0.139932	872407	0.110259	3.15455e+06	0.103472	989518
219-74	0.141142	1.36724e+06	0.093576	1.72204e+06	0.13941	1.01953e+06	0.068112	1.16314e+06	0.122158	4.37453e+06	0.125338	667063	0.134482	1.06241e+06	0.11774	3.13846e+06	0.112275	1.60335e+06
219-75	0.125398	1.66691e+06	0.0915041	1.64681e+06	-1	-1	0.0798581	979277	0.0904532	1.63715e+06	0.140739	763568	0.144061	935054	0.111327	3.21825e+06	0.117454	1.6385e+06
219-77	0.150928	1.59842e+06	0.0992987	1.62994e+06	0.143608	956138	0.0784331	868391	0.106906	3.25575e+06	0.128552	758138	0.130546	864140	0.107824	2.95697e+06	0.0908513	1.32639e+06
219-78	0.149949	1.28997e+06	0.101117	1.54292e+06	-1	-1	0.0724527	797198	0.078236	1.67146e+06	0.121434	652283	0.130968	873803	0.107306	2.54641e+06	0.0930411	1.5739e+06
219-8	0.145444	1.26334e+06	0.0945878	1.71047e+06	-1	-1	0.0815789	870445	0.0929526	1.31323e+06	0.14136	891996	0.142906	903380	0.107328	3.19543e+06	0.0936792	1.15439e+06
219-80	0.143313	1.57852e+06	0.103736	1.65302e+06	0.145774	1.19825e+06	0.0800405	1.53874e+06	0.0883206	1.69156e+06	0.136355	971545	0.135592	1.02482e+06	0.123416	2.96734e+06	0.101991	2.40356e+06
219-81	0.135841	1.62578e+06	0.106207	2.29092e+06	-1	-1	0.0660189	748185	0.0827066	1.83834e+06	0.127389	713658	0.123549	751938	0.109956	2.62397e+06	0.103091	2.05326e+06
219-82	0.146363	1.4557e+06	0.107055	2.13199e+06	0.132982	906388	0.0693212	695743	0.0822526	1.64285e+06	0.114202	617779	0.126738	916365	0.111166	2.62585e+06	0.0934926	1.6017e+06
219-83	0.141907	2.06122e+06	0.102122	2.10941e+06	-1	-1	0.0815096	1.31038e+06	0.113392	3.15561e+06	0.131545	875276	0.134452	1.05624e+06	0.118188	3.23748e+06	0.089685	2.05851e+06
219-84	0.129928	1.4943e+06	0.103506	2.12637e+06	0.152063	1.10603e+06	0.0782103	936323	0.0979857	1.79894e+06	0.140989	946479	0.137699	805657	0.117878	2.84337e+06	0.0932291	1.86235e+06
219-85	0.136947	1.58666e+06	0.0907188	1.69958e+06	0.140575	1.04133e+06	0.0811724	1.0467e+06	0.0803668	1.50588e+06	0.134765	989660	0.13508	1.08991e+06	0.109834	2.75941e+06	0.0930921	1.57908e+06
219-86	0.14057	1.43029e+06	0.103295	1.78545e+06	-1	-1	0.0770446	866571	0.0860511	1.47813e+06	0.127168	700863	0.135106	868011	0.110884	2.3917e+06	0.0872135	1.14445e+06
219-9	0.135715	1.12814e+06	0.0874942	1.50313e+06	0.154795	842844	0.045694	522979	0.0799401	1.72976e+06	0.117823	715557	0.131068	843182	0.107968	2.7427e+06	0.0915734	1.16322e+06
220-1	0.114307	2.50964e+06	0.0841031	2.55669e+06	0.151449	1.47122e+06	0.0723833	1.57712e+06	0.089297	2.51599e+06	0.125625	1.24102e+06	0.117485	1.26515e+06	0.111288	3.90674e+06	0.0940086	2.44535e+06
220-10	0.125756	2.99573e+06	0.0765409	2.53233e+06	0.156857	1.47153e+06	0.0625106	1.73896e+06	0.0930995	2.67662e+06	0.130248	1.68961e+06	0.126419	1.41135e+06	0.109438	4.05436e+06	0.0900567	2.12922e+06
220-11	0.116269	3.20334e+06	0.080304	2.34684e+06	0.164765	1.78914e+06	0.0865053	2.0235e+06	0.0928432	2.86038e+06	0.133847	1.79698e+06	0.128892	1.47055e+06	0.115039	4.12146e+06	0.0949822	2.34639e+06
220-120	0.120977	1.47816e+06	0.0825512	1.38004e+06	0.15522	839704	0.0745133	970645	0.116475	3.97897e+06	0.141048	1.02145e+06	0.141871	726564	0.103604	2.64191e+06	0.0837519	1.21324e+06
220-121	0.117626	2.68632e+06	0.0853254	2.32892e+06	0.141478	1.54911e+06	0.0565556	1.03992e+06	0.0920768	2.17256e+06	0.127504	1.18868e+06	0.126032	1.33797e+06	0.109363	3.86829e+06	0.0980273	2.28999e+06
220-122	0.124975	2.3746e+06	0.0843794	2.62011e+06	0.141257	1.77407e+06	0.0785132	1.39576e+06	0.0895385	1.95915e+06	0.128662	1.19535e+06	0.123848	1.33237e+06	0.111819	3.91545e+06	0.0993706	2.84473e+06
220-123	0.123244	2.30167e+06	0.0801208	1.83151e+06	0.153146	1.67454e+06	0.0521737	1.34502e+06	0.100992	2.22469e+06	0.13677	1.38864e+06	0.135405	1.44432e+06	0.131957	3.75891e+06	0.0880556	1.79361e+06
220-124	0.112997	2.38695e+06	0.0871971	2.27238e+06	0.148214	1.18495e+06	0.0786809	1.31095e+06	0.125573	5.14789e+06	0.138409	1.14125e+06	0.13728	1.00861e+06	0.110342	3.53906e+06	0.100274	2.17295e+06
220-126	0.0978123	2.02835e+06	0.0762813	1.75817e+06	0.13931	1.03152e+06	0.079588	1.26135e+06	0.0912425	2.18889e+06	0.138537	1.32539e+06	0.126752	813996	0.102268	3.87521e+06	0.0968958	1.60737e+06
220-127	0.118069	2.87354e+06	0.0741201	2.01383e+06	0.142775	2.00972e+06	0.0589523	1.45763e+06	0.123044	5.94824e+06	0.13165	1.6206e+06	0.12454	1.53538e+06	0.107888	3.89627e+06	0.0905247	2.17228e+06
220-128	0.121109	2.35192e+06	0.0803339	1.71592e+06	0.152214	1.4397e+06	0.054706	977400	0.0923636	2.04796e+06	0.134096	1.07191e+06	0.133603	1.20156e+06	0.113422	3.45049e+06	0.0964216	1.81324e+06
220-129	0.110945	2.06395e+06	0.0910629	2.09225e+06	0.152996	972681	0.0738276	1.25431e+06	0.092918	1.74151e+06	0.144942	1.25119e+06	0.142408	854855	0.107262	3.18642e+06	0.10114	2.16715e+06
220-13	0.135598	2.51161e+06	0.07909	2.11095e+06	0.16042	1.43073e+06	0.0730189	1.72692e+06	0.0832316	2.44054e+06	0.131909	1.42395e+06	0.127552	1.18507e+06	0.12022	4.08585e+06	0.0898003	2.01563e+06
220-130	0.118041	2.57358e+06	0.0851337	2.16593e+06	0.14905	1.52602e+06	0.0718843	1.38288e+06	0.0929225	1.9229e+06	0.128123	973984	0.132637	1.32707e+06	0.114949	3.54821e+06	0.101734	2.66226e+06
220-131	0.120517	2.78947e+06	0.0774704	2.04824e+06	0.147776	1.51434e+06	0.0591199	1.96807e+06	0.0912602	2.30977e+06	0.12926	1.17954e+06	0.129216	1.28777e+06	0.109985	3.86493e+06	0.0908243	2.01719e+06
220-132	0.126789	3.28736e+06	0.0801722	2.27206e+06	0.153214	1.87505e+06	0.0755488	1.74632e+06	0.0974354	2.46256e+06	0.134735	1.53361e+06	0.133051	1.88776e+06	0.122901	4.48528e+06	0.09708	2.47244e+06
220-133	0.12453	2.32512e+06	0.0907454	2.2409e+06	0.161252	1.4059e+06	0.0795317	1.53251e+06	0.148505	4.60042e+06	0.142088	1.1968e+06	0.131276	888968	0.142724	3.33565e+06	0.0924802	1.70868e+06
220-14	0.106122	2.9407e+06	0.0894024	3.54379e+06	0.154643	1.72364e+06	0.0706259	1.51667e+06	0.0899323	2.92291e+06	0.126304	1.28422e+06	0.117479	1.36788e+06	0.108864	4.33628e+06	0.0876503	2.37491e+06
220-15	0.0976142	2.08718e+06	0.080896	2.44872e+06	0.151498	1.29501e+06	0.0638084	1.25038e+06	0.0859083	2.54827e+06	0.134921	1.19442e+06	0.128774	887204	0.0998125	4.08799e+06	0.101982	1.887e+06
220-16	0.112081	1.87369e+06	0.0874025	1.85526e+06	0.162025	1.17773e+06	0.0675401	933727	0.0847245	2.10417e+06	0.136444	1.02353e+06	0.136567	1.11966e+06	0.107365	3.57642e+06	0.102637	1.74072e+06
220-17	0.126408	2.27164e+06	0.0814729	1.95292e+06	0.164107	1.31684e+06	0.0685338	1.32959e+06	0.092306	2.3876e+06	0.131344	1.05341e+06	0.127593	1.23821e+06	0.111236	3.72041e+06	0.0931295	2.09174e+06
220-18	0.118726	2.60907e+06	0.0825881	2.10843e+06	0.153538	1.55024e+06	0.067598	1.41331e+06	0.0907603	2.66349e+06	0.125915	1.1421e+06	0.120829	1.44514e+06	0.106797	3.98564e+06	0.0926783	2.27658e+06
220-19	0.0985557	2.14721e+06	0.0708477	1.6691e+06	0.150686	1.37848e+06	0.0725153	1.32432e+06	0.0849775	2.31105e+06	0.133796	1.07261e+06	0.126086	956454	0.10049	3.6553e+06	0.0973157	1.71421e+06
220-21	0.107945	1.93266e+06	0.078898	1.43317e+06	0.159785	1.04761e+06	0.0607889	636503	0.10943	3.65047e+06	0.13898	1.11468e+06	0.132353	659855	0.103213	3.56906e+06	0.0856688	1.00254e+06
220-22	0.121505	3.05284e+06	0.0707757	1.89425e+06	0.160601	1.6849e+06	0.0692845	1.63904e+06	0.137439	6.09352e+06	0.129288	1.54673e+06	0.12827	1.6769e+06	0.125501	3.60772e+06	0.0891732	2.50844e+06
220-24	0.106553	1.80742e+06	0.0721154	1.2393e+06	0.155121	1.36334e+06	0.0662647	1.46449e+06	0.0901306	2.17921e+06	0.131745	1.41724e+06	0.131373	999653	0.100672	3.31509e+06	0.0981045	1.61909e+06
220-25	0.113932	2.14341e+06	0.0697578	1.60314e+06	0.155575	1.41487e+06	0.0557852	1.19246e+06	0.117882	5.84882e+06	0.135145	1.24811e+06	0.11766	1.0819e+06	0.104543	3.57682e+06	0.0859982	1.78886e+06
220-26	0.104588	2.01996e+06	0.0900875	2.26688e+06	0.162455	1.08576e+06	0.0729231	940228	0.0960106	2.14046e+06	0.139184	990122	0.137122	1.00587e+06	0.113352	3.62035e+06	0.0943551	1.43815e+06
220-27	0.122876	2.48457e+06	0.0794623	1.96472e+06	0.164543	1.33964e+06	0.0800309	1.53031e+06	0.125469	5.47257e+06	0.136954	1.22784e+06	0.131809	1.25289e+06	0.114378	3.85556e+06	0.0981353	2.38591e+06
220-28	0.106016	2.32225e+06	0.0950946	3.07129e+06	0.161238	976323	0.0800799	954109	0.120258	4.7723e+06	0.139032	1.28801e+06	0.127931	1.10415e+06	0.113707	3.67772e+06	0.152597	1.53934e+06
220-29	0.109066	2.12108e+06	0.0878908	2.29331e+06	0.157615	892755	0.0644886	769360	0.0879216	2.02765e+06	0.139975	869440	0.130612	1.0802e+06	0.0981666	3.3876e+06	0.144709	1.15786e+06
220-3	0.116968	2.86063e+06	0.0836986	1.93014e+06	0.165301	1.42153e+06	0.0806897	1.50571e+06	0.0919431	2.44127e+06	0.135356	1.29479e+06	0.130339	1.21699e+06	0.118785	3.67412e+06	0.0951406	2.32253e+06
220-30	0.106807	2.46576e+06	0.0922971	2.19536e+06	0.165078	1.38059e+06	0.056276	917705	0.0942128	1.86798e+06	0.13145	1.07857e+06	0.124753	1.04153e+06	0.123745	3.31878e+06	0.1202	1.21056e+06
220-32	0.122799	2.17605e+06	0.0894077	1.88545e+06	0.163924	1.23957e+06	0.0603553	1.06412e+06	0.137018	4.40415e+06	0.132482	1.16083e+06	0.124967	960219	0.125226	3.23802e+06	0.142925	1.5951e+06
220-33	0.124281	2.44695e+06	0.0810215	2.63771e+06	0.14991	1.83067e+06	0.0564067	1.61305e+06	0.0867444	2.64892e+06	0.122895	1.85553e+06	0.117796	1.54408e+06	0.110396	4.02249e+06	0.123147	1.60078e+06
220-34	0.112405	3.4976e+06	0.0850456	2.92354e+06	0.149286	1.87349e+06	0.0689622	1.2218e+06	0.0994685	2.58264e+06	0.120436	1.943e+06	0.118573	1.65294e+06	0.119812	4.27718e+06	0.13983	2.22383e+06
220-35	0.114489	2.241e+06	0.089111	2.66041e+06	0.168116	1.27553e+06	0.0769479	1.47224e+06	0.0884973	2.23478e+06	0.133964	1.15603e+06	0.124225	959190	0.110758	3.44597e+06	0.134187	1.44861e+06
220-36	0.122419	2.20017e+06	0.0857995	2.03907e+06	0.162985	1.32454e+06	0.0728938	1.26308e+06	0.0868657	1.93882e+06	0.13488	1.2667e+06	0.129473	1.13494e+06	0.115171	3.34984e+06	0.128898	1.39512e+06
220-37	0.12334	2.97581e+06	0.0879839	2.66839e+06	0.157725	1.71914e+06	0.0639835	1.33315e+06	0.0942283	2.32362e+06	0.125208	1.78641e+06	0.121236	1.51167e+06	0.123904	3.65401e+06	0.138172	1.98377e+06
220-38	0.105304	1.92276e+06	0.0824789	1.73492e+06	0.159202	1.06358e+06	0.0640429	1.01652e+06	0.0956157	1.55041e+06	0.136757	1.04049e+06	0.129417	928804	0.111262	3.11407e+06	0.144329	1.24733e+06
220-39	0.117557	3.6189e+06	0.0966838	3.9053e+06	0.16883	1.65263e+06	0.0751457	1.60609e+06	0.0971798	2.64072e+06	0.131745	1.61023e+06	0.129143	1.43503e+06	0.114739	4.61583e+06	0.145419	2.12553e+06
220-4	0.108827	2.39206e+06	0.0882389	2.45723e+06	0.16772	1.24973e+06	0.0666947	1.44957e+06	0.123046	6.01961e+06	0.134854	1.12951e+06	0.127058	1.10525e+06	0.115424	3.82173e+06	0.0982045	2.46294e+06
220-40	0.114988	1.29005e+06	0.0873305	1.62014e+06	0.168365	794661	0.0669762	749232	0.0926213	1.5569e+06	0.146422	1.00575e+06	0.138968	853752	0.100187	2.87046e+06	0.137678	858715
220-41	0.108398	2.00596e+06	0.0806009	1.92088e+06	0.162696	930996	0.0634229	479234	0.0894416	1.96109e+06	0.134282	730021	0.136768	806230	0.0985132	3.23649e+06	0.125474	771150
220-42	0.113961	2.63816e+06	0.0788673	2.45471e+06	0.150178	1.33691e+06	0.0798357	1.51598e+06	0.0876111	2.25749e+06	0.1254	1.27821e+06	0.121588	1.11336e+06	0.105774	3.53049e+06	0.138876	1.79027e+06
220-43	0.135221	2.40035e+06	0.0836798	2.59741e+06	0.165952	1.57594e+06	0.0691867	1.45552e+06	0.0861291	2.0525e+06	0.128457	1.55746e+06	0.128011	1.447e+06	0.11769	3.64081e+06	0.118587	1.50941e+06
220-44	0.116858	2.40996e+06	0.0772959	2.43059e+06	0.165524	1.61598e+06	0.062988	1.27759e+06	0.0935519	2.56639e+06	0.128074	1.65945e+06	0.127196	1.68691e+06	0.114648	3.90567e+06	0.139925	1.93143e+06
220-46	0.121096	2.78863e+06	0.0711068	2.49203e+06	0.151344	1.88158e+06	0.062162	1.48226e+06	0.0849011	2.70036e+06	0.122604	1.82756e+06	0.116842	1.44377e+06	0.105259	4.06852e+06	0.114566	1.4559e+06
220-5	0.111602	2.41369e+06	0.0789348	2.38444e+06	0.156076	1.31599e+06	0.0768504	1.64141e+06	0.0873549	2.34369e+06	0.130688	1.37723e+06	0.123622	1.32643e+06	0.108349	3.97373e+06	0.0900564	1.85165e+06
220-51	0.11503	1.66415e+06	0.0780005	1.52374e+06	0.171093	798424	0.0745932	509626	0.120486	3.53415e+06	0.143599	753835	0.138412	636433	0.106831	3.3745e+06	0.140719	963948
220-52	0.112445	2.2372e+06	0.0871591	2.40405e+06	0.169527	791056	0.0906648	1.57826e+06	0.0917367	1.92724e+06	0.134843	852139	0.140907	910711	0.108353	3.40995e+06	0.127959	1.23879e+06
220-53	0.101117	1.68916e+06	0.0908788	1.90488e+06	0.136071	1.21115e+06	0.0904694	917659	0.115231	3.98704e+06	0.134729	1.23692e+06	0.135527	1.18543e+06	0.117395	3.47428e+06	0.102144	930318
220-55	0.11892	2.92941e+06	0.0852651	2.30982e+06	0.147511	1.91916e+06	0.0683675	1.51475e+06	0.0837109	2.51883e+06	0.131753	1.68573e+06	0.131464	1.50936e+06	0.111526	3.92795e+06	0.0993173	2.11161e+06
220-56	0.134136	2.40228e+06	0.0834834	1.88717e+06	0.141248	1.8823e+06	0.0759475	1.7802e+06	0.0928619	2.67371e+06	0.126711	1.48425e+06	0.122074	1.32244e+06	0.111955	3.60231e+06	0.102746	2.47676e+06
220-57	0.112149	2.38851e+06	0.0850567	1.92696e+06	0.1365	1.54605e+06	0.0737006	1.41643e+06	0.0907887	2.063e+06	0.139858	1.27286e+06	0.122247	1.1415e+06	0.108281	3.56316e+06	0.10604	1.98576e+06
220-59	0.11188	1.9803e+06	0.0973561	1.83698e+06	0.145043	1.03686e+06	0.088629	1.34229e+06	0.10804	1.40253e+06	0.140509	1.00063e+06	0.138538	907085	0.120709	3.22158e+06	0.111192	1.46631e+06
220-6	0.110874	2.57025e+06	0.0818254	2.17139e+06	0.151446	1.43554e+06	0.0629215	2.08395e+06	0.096027	2.1672e+06	0.128854	1.32926e+06	0.12257	1.43441e+06	0.124212	3.79781e+06	0.0874979	2.018e+06
220-60	0.115369	2.14482e+06	0.0929529	1.80349e+06	0.148085	1.15888e+06	0.0887728	1.21361e+06	0.095634	1.71716e+06	0.143582	948281	0.14314	765804	0.110634	3.42768e+06	0.108243	1.81874e+06
220-61	0.118181	2.86113e+06	0.0859291	2.06813e+06	0.139895	1.40892e+06	0.0683954	1.2348e+06	0.121431	5.21222e+06	0.132031	1.17073e+06	0.123361	1.06008e+06	0.109538	3.68253e+06	0.110258	2.26107e+06
220-62	0.110993	2.30283e+06	0.0881926	2.0339e+06	0.139885	1.38265e+06	0.0637232	1.3063e+06	0.0916434	1.97485e+06	0.137378	1.16372e+06	0.133169	1.35446e+06	0.114606	3.69357e+06	0.102397	1.83302e+06
220-63	0.104603	1.45928e+06	0.0981041	2.09932e+06	0.15337	878411	0.0726088	1.14e+06	0.0944593	1.78498e+06	0.137012	842546	0.144026	819743	0.113636	3.24025e+06	0.0973299	1.1162e+06
220-64	0.112089	1.5406e+06	0.0835979	1.39357e+06	0.152749	931562	0.0651552	946132	0.0972703	1.70176e+06	0.140333	1.07125e+06	0.142969	847596	0.104455	3.21538e+06	0.0992909	1.11316e+06
220-65	0.110131	1.88105e+06	0.0831228	1.91959e+06	0.131714	1.34291e+06	0.0592226	1.27452e+06	0.0890878	2.30088e+06	0.12879	1.10523e+06	0.123498	1.27286e+06	0.108709	3.73629e+06	0.104562	1.77869e+06
220-66	0.115247	2.36701e+06	0.0842333	2.15145e+06	0.137446	1.61306e+06	0.0771241	1.43044e+06	0.104091	2.09114e+06	0.133377	1.29042e+06	0.126782	1.32977e+06	0.125416	3.57361e+06	0.106852	1.93356e+06
220-67	0.112344	1.86478e+06	0.0869901	1.94582e+06	0.153014	966509	0.0847399	1.16238e+06	0.0992668	1.89369e+06	0.140072	1.12992e+06	0.140336	1.00927e+06	0.111497	3.34733e+06	0.106695	1.54489e+06
220-68	0.10692	1.98683e+06	0.0808686	1.24281e+06	0.149019	800564	0.0751268	1.12268e+06	0.0949443	2.23871e+06	0.138562	900328	0.144563	873137	0.104195	3.3119e+06	0.101147	1.16587e+06
220-69	0.109139	2.18464e+06	0.0830621	1.92195e+06	0.138046	1.2946e+06	0.0849977	1.15346e+06	0.102524	1.94453e+06	0.131868	1.08752e+06	0.130082	1.05785e+06	0.11977	3.20517e+06	0.103404	1.57724e+06
220-7	0.133073	2.20348e+06	0.0929365	2.40781e+06	0.165419	1.26652e+06	0.0621352	1.37028e+06	0.0868885	1.98869e+06	0.131516	1.08374e+06	0.134269	1.17204e+06	0.117643	3.60488e+06	0.0867995	1.61605e+06
220-70	0.1092	2.29657e+06	0.0914552	2.33616e+06	0.132871	1.12963e+06	0.0686127	717809	0.0967732	2.09944e+06	0.133197	960608	0.129471	1.02947e+06	0.102589	4.18583e+06	0.115608	1.64397e+06
220-71	0.124393	2.62359e+06	0.0886094	1.88396e+06	0.146988	1.29996e+06	0.0745425	1.4669e+06	0.143335	4.87565e+06	0.137946	1.07843e+06	0.132724	1.07498e+06	0.141348	3.48599e+06	0.112643	2.29853e+06
220-72	0.117745	2.6895e+06	0.0834161	1.75778e+06	0.147602	1.36721e+06	0.0820891	1.54476e+06	0.0993756	2.20599e+06	0.13882	1.3804e+06	0.132876	1.26343e+06	0.118473	3.63554e+06	0.0988651	1.77725e+06
220-73	0.106985	2.17605e+06	0.0772208	1.67748e+06	0.140102	1.3564e+06	0.0669259	1.36088e+06	0.13905	4.67028e+06	0.13646	1.27629e+06	0.126053	968261	0.129364	3.41535e+06	0.0949339	1.42797e+06
220-74	0.119	2.88567e+06	0.0805875	2.29936e+06	0.137443	1.87184e+06	0.0669314	1.70054e+06	0.124722	5.84024e+06	0.129458	1.68436e+06	0.123552	1.41404e+06	0.119106	4.25176e+06	0.101763	2.36439e+06
220-75	0.107187	2.34137e+06	0.0844463	1.64931e+06	0.152117	852192	0.0800992	1.02292e+06	0.112207	1.57112e+06	0.143392	925914	0.141941	906948	0.130149	3.28262e+06	0.117268	1.89761e+06
220-77	0.12295	3.05018e+06	0.0859083	2.37532e+06	0.143407	2.1408e+06	0.0689975	1.66704e+06	0.113998	5.64703e+06	0.126266	1.62398e+06	0.119073	1.63475e+06	0.108525	4.38895e+06	0.0875764	2.84314e+06
220-78	0.115182	2.42243e+06	0.0856103	1.90632e+06	0.136495	1.58578e+06	0.0650509	1.11784e+06	0.0850381	2.25145e+06	0.129638	1.1222e+06	0.1237	1.30513e+06	0.108141	3.51726e+06	0.0858961	2.71094e+06
220-8	0.10882	1.9507e+06	0.092071	1.73273e+06	0.170344	1.04232e+06	0.0837647	1.09076e+06	0.107819	1.27443e+06	0.143425	1.31489e+06	0.135887	922938	0.11952	3.3047e+06	0.088583	1.48547e+06
220-80	0.118464	2.57015e+06	0.0917424	2.0248e+06	0.149438	1.89556e+06	0.0786206	1.59897e+06	0.102045	2.15589e+06	0.135446	1.63e+06	0.130997	1.66479e+06	0.133181	3.91419e+06	0.0934487	2.89191e+06
220-81	0.118833	2.12113e+06	0.0970858	2.46904e+06	0.139166	1.24072e+06	0.066352	961005	0.0883234	2.36184e+06	0.13529	1.09724e+06	0.122515	834928	0.108837	3.25794e+06	0.0904311	2.62235e+06
220-82	0.119176	2.31723e+06	0.09467	2.66034e+06	0.140605	1.66391e+06	0.0828378	1.33383e+06	0.0889353	2.09645e+06	0.125596	1.10225e+06	0.126187	1.41395e+06	0.111369	3.5814e+06	0.0865605	2.29336e+06
220-83	0.124304	3.18524e+06	0.0944548	2.6452e+06	0.149571	2.08989e+06	0.0705923	1.60798e+06	0.11777	5.04626e+06	0.127715	1.63193e+06	0.129863	1.82933e+06	0.117574	4.48809e+06	0.0846256	2.78539e+06
220-84	0.119161	2.53993e+06	0.0992119	2.38588e+06	0.153432	1.5517e+06	0.0725232	1.12764e+06	0.110415	2.09793e+06	0.140524	1.28995e+06	0.125819	957550	0.142189	3.17122e+06	0.0924737	2.48979e+06
220-85	0.110662	2.42586e+06	0.0828191	1.70581e+06	0.141113	1.2407e+06	0.0703296	1.61618e+06	0.0854131	1.72466e+06	0.134951	1.13123e+06	0.128531	1.11735e+06	0.112461	3.16711e+06	0.0900505	2.19376e+06
220-86	0.116433	2.43314e+06	0.0964939	2.39197e+06	0.14194	1.41823e+06	0.0760814	1.4919e+06	0.0920219	1.77157e+06	0.127393	1.0972e+06	0.128509	1.1555e+06	0.125498	3.1993e+06	0.0866921	2.3494e+06
220-9	0.107945	2.1855e+06	0.0684354	1.73165e+06	0.161866	1.25558e+06	0.0580193	1.57561e+06	0.0826096	2.09127e+06	0.134841	1.32186e+06	0.128625	1.09921e+06	0.112459	3.85353e+06	0.0883349	1.82492e+06
221-1	0.11521	1.9237e+06	0.0969786	2.59404e+06	0.137688	1.08052e+06	0.0433586	1.06671e+06	0.0817606	2.02449e+06	0.110528	927853	0.118961	1.15821e+06	0.106866	3.17026e+06	0.0940261	2.14446e+06
221-10	0.131654	2.03496e+06	0.0868868	2.21547e+06	0.152012	1.22919e+06	0.0377708	896689	0.0924678	2.07866e+06	0.121069	1.14875e+06	0.1304	1.692e+06	0.115707	3.62625e+06	0.0958911	2.00026e+06
221-11	0.113629	2.1886e+06	0.089306	2.02037e+06	0.160894	1.34243e+06	0.0663262	1.37227e+06	0.0887081	2.15048e+06	0.132804	1.24616e+06	0.133166	1.34052e+06	0.120644	3.53222e+06	0.0993282	2.08079e+06
221-120	0.141628	1.31069e+06	0.0954666	1.696e+06	0.14712	730202	0.0751262	597166	0.122255	3.94466e+06	0.124828	591039	0.147162	1.03544e+06	0.113347	2.88792e+06	0.0923139	1.33431e+06
221-121	0.114429	1.98681e+06	0.0930345	2.44206e+06	0.13508	1.27143e+06	0.0484723	1.36407e+06	0.0869128	1.81428e+06	0.114219	861534	0.130031	1.51215e+06	0.111579	3.75795e+06	0.0973471	2.2197e+06
221-122	0.123031	1.86836e+06	0.0942522	2.95689e+06	0.137417	1.53347e+06	0.0629172	1.20013e+06	0.0867509	1.69381e+06	0.112028	887582	0.128649	1.62794e+06	0.113408	3.7782e+06	0.102558	2.98763e+06
221-123	0.123194	1.59171e+06	0.0896206	1.797e+06	0.146141	1.16037e+06	0.0367971	1.49049e+06	0.0939036	1.63712e+06	0.119553	778256	0.139741	1.31984e+06	0.127842	3.22844e+06	0.0951286	1.5998e+06
221-124	0.11278	2.15831e+06	0.101135	2.71661e+06	0.142745	1.10273e+06	0.0548168	1.01425e+06	0.126893	5.03523e+06	0.120072	838567	0.136254	1.29979e+06	0.115573	3.51491e+06	0.108045	2.41223e+06
221-126	0.104216	1.84011e+06	0.092369	2.53922e+06	0.132562	1.11459e+06	0.0522146	918036	0.093585	2.06213e+06	0.133347	1.03995e+06	0.128592	1.07645e+06	0.108289	3.81516e+06	0.0991323	1.69609e+06
221-127	0.1139	2.18351e+06	0.0864184	2.15644e+06	0.136209	1.45931e+06	0.0501844	1.5132e+06	0.126768	5.31872e+06	0.122976	1.02542e+06	0.131617	1.57463e+06	0.11401	3.69985e+06	0.0925879	1.89015e+06
221-128	0.124226	1.97067e+06	0.0877254	1.70043e+06	0.147902	1.20806e+06	0.0422275	740313	0.088428	1.69957e+06	0.115934	836467	0.13837	1.42048e+06	0.116284	3.31902e+06	0.0995433	1.74073e+06
221-129	0.114522	1.94645e+06	0.103549	2.31651e+06	0.144763	783363	0.0592539	1.01227e+06	0.0945352	1.63095e+06	0.1372	870697	0.146257	1.12732e+06	0.118176	3.37048e+06	0.105568	2.056e+06
221-13	0.135472	1.45356e+06	0.0970541	2.05964e+06	0.1495	1.01013e+06	0.0534451	1.01822e+06	0.0860751	1.88269e+06	0.123024	952675	0.126508	998469	0.119131	2.99074e+06	0.096385	1.76211e+06
221-130	0.118496	2.01922e+06	0.0959705	2.40133e+06	0.140378	1.25067e+06	0.0685605	1.22821e+06	0.0886603	1.68089e+06	0.102882	676407	0.133098	1.43311e+06	0.117229	3.3947e+06	0.104666	2.57555e+06
221-131	0.122088	2.08946e+06	0.0902454	2.25271e+06	0.140121	1.23675e+06	0.0519604	1.52654e+06	0.0869847	1.74316e+06	0.106572	762070	0.134138	1.35109e+06	0.113119	3.49199e+06	0.0998748	1.67353e+06
221-132	0.123426	2.20719e+06	0.095052	2.26758e+06	0.147256	1.13816e+06	0.055351	1.09422e+06	0.0930591	1.90815e+06	0.111773	747499	0.138247	1.49691e+06	0.121023	3.59599e+06	0.104195	2.3114e+06
221-133	0.116263	1.92256e+06	0.0971303	2.679e+06	0.153686	1.25008e+06	0.0586599	1.35653e+06	0.145393	4.51704e+06	0.132259	1.05422e+06	0.135056	1.06498e+06	0.134288	3.21962e+06	0.0994975	1.66571e+06
221-14	0.107839	2.06893e+06	0.100156	3.96801e+06	0.139258	1.37881e+06	0.0475761	1.14658e+06	0.0863608	2.36903e+06	0.111981	1.0335e+06	0.113389	1.27083e+06	0.105883	3.81403e+06	0.0931936	2.20858e+06
221-15	0.112765	1.78192e+06	0.0991712	2.65498e+06	0.134344	1.07489e+06	0.0373674	909733	0.0829726	2.25461e+06	0.122552	849817	0.119678	948237	0.105242	3.24347e+06	0.103707	2.30974e+06
221-16	0.116422	1.79791e+06	0.0985408	2.47461e+06	0.149246	967182	0.0481341	629242	0.0776806	1.76679e+06	0.114766	720152	0.129294	1.05159e+06	0.107997	3.22511e+06	0.103731	2.0042e+06
221-17	0.132698	1.87576e+06	0.0957961	2.11216e+06	0.159183	1.22008e+06	0.0484457	1.61819e+06	0.0871074	2.09922e+06	0.111764	837160	0.132584	1.51795e+06	0.112393	3.65015e+06	0.0940146	2.02895e+06
221-18	0.124611	2.07653e+06	0.0963224	2.26201e+06	0.148414	1.42093e+06	0.0485142	1.60387e+06	0.0860522	2.28544e+06	0.107836	814532	0.125928	1.6375e+06	0.109036	3.77663e+06	0.0931077	2.16654e+06
221-19	0.10793	1.96685e+06	0.0878467	2.27466e+06	0.135736	1.1504e+06	0.0535397	1.0474e+06	0.0796457	2.07958e+06	0.118797	892624	0.121854	1.01864e+06	0.101034	3.18578e+06	0.0964835	1.95654e+06
221-21	0.115065	1.6207e+06	0.095305	1.53505e+06	0.156858	1.05235e+06	0.0403504	534687	0.118571	3.59655e+06	0.132002	902944	0.137254	900104	0.1096	3.10764e+06	0.0885413	887948
221-22	0.121301	2.12398e+06	0.0868809	1.8636e+06	0.154181	1.23742e+06	0.0515309	1.04905e+06	0.136219	5.06577e+06	0.117776	980670	0.132648	1.66735e+06	0.124433	3.36531e+06	0.0941225	2.10094e+06
221-24	0.127029	1.31941e+06	0.0812082	1.32697e+06	0.148656	1.19757e+06	0.045616	956093	0.0844966	2.02924e+06	0.118097	762133	0.129504	1.39956e+06	0.107758	2.97679e+06	0.104397	1.66677e+06
221-25	0.112454	1.85625e+06	0.0829134	1.89804e+06	0.151333	1.33212e+06	0.043653	1.14662e+06	0.117958	5.6633e+06	0.129715	1.23002e+06	0.123024	1.29733e+06	0.107468	3.6326e+06	0.0903807	1.69074e+06
221-26	0.111653	1.75311e+06	0.102936	2.92597e+06	0.144486	881440	0.0509193	716729	0.0885636	1.96293e+06	0.116117	728202	0.128063	975494	0.108866	3.33381e+06	0.0950953	1.64339e+06
221-27	0.129636	1.86971e+06	0.0918567	2.13628e+06	0.159301	1.16e+06	0.0644267	1.06216e+06	0.125288	5.28756e+06	0.124241	1.03455e+06	0.133235	1.54569e+06	0.115169	3.68621e+06	0.100465	2.34397e+06
221-28	0.102813	2.2349e+06	0.101325	3.18871e+06	0.149755	1.08917e+06	0.0599147	1.22097e+06	0.122698	4.76643e+06	0.125141	947315	0.131396	1.38496e+06	0.114909	3.68102e+06	0.154637	1.4711e+06
221-29	0.11127	2.09355e+06	0.0978971	2.55558e+06	0.140904	1.00515e+06	0.0463256	1.20804e+06	0.0831708	1.92346e+06	0.116894	802152	0.132919	1.3939e+06	0.106567	3.37689e+06	0.141565	1.56753e+06
221-3	0.115976	1.99449e+06	0.0931618	2.16425e+06	0.160063	1.3111e+06	0.0563959	1.91407e+06	0.088282	2.07077e+06	0.119239	982292	0.131458	1.60316e+06	0.11986	3.54903e+06	0.0993056	2.36789e+06
221-30	0.107034	1.8874e+06	0.104752	2.53637e+06	0.147612	1.00936e+06	0.0461854	754534	0.0850212	1.7668e+06	0.109058	713780	0.126789	1.04371e+06	0.112654	2.92351e+06	0.120506	1.26735e+06
221-32	0.121756	1.90741e+06	0.0983713	2.14733e+06	0.158936	1.16883e+06	0.056828	1.35772e+06	0.133633	4.38149e+06	0.12323	1.04424e+06	0.132557	1.16997e+06	0.123002	3.21741e+06	0.141893	1.69976e+06
221-33	0.126695	1.76936e+06	0.0922929	2.3759e+06	0.144757	1.45176e+06	0.0523657	1.76668e+06	0.0855682	2.05271e+06	0.116172	1.21804e+06	0.126097	1.61505e+06	0.112437	3.67073e+06	0.130878	1.58038e+06
221-34	0.109454	2.47291e+06	0.0962105	2.74899e+06	0.13827	1.34046e+06	0.0460409	886654	0.0991132	1.97357e+06	0.110324	1.1484e+06	0.124831	1.69675e+06	0.120021	3.70511e+06	0.142855	2.07505e+06
221-35	0.114268	1.81124e+06	0.101111	2.74317e+06	0.161733	1.25128e+06	0.0590433	1.78388e+06	0.083406	2.02627e+06	0.12636	1.01083e+06	0.132265	1.14375e+06	0.112998	3.38362e+06	0.140204	1.66186e+06
221-36	0.122309	1.83874e+06	0.0963438	2.39526e+06	0.155182	1.10689e+06	0.0548606	1.1572e+06	0.0811608	1.72457e+06	0.119106	1.04738e+06	0.135133	1.439e+06	0.118545	3.32804e+06	0.133688	1.57502e+06
221-37	0.117518	1.74562e+06	0.0984588	2.30317e+06	0.149516	1.15031e+06	0.0496659	1.01632e+06	0.0904085	1.79636e+06	0.108749	777516	0.130366	1.47433e+06	0.117238	3.10503e+06	0.143994	1.70738e+06
221-38	0.107875	1.74099e+06	0.0984215	2.16494e+06	0.148762	1.00636e+06	0.0482768	825712	0.0885307	1.67343e+06	0.115444	830273	0.133265	1.39419e+06	0.113117	3.2103e+06	0.146688	1.4948e+06
221-39	0.113121	2.09157e+06	0.108782	3.2714e+06	0.136776	855647	0.0695769	1.06813e+06	0.0891666	1.79745e+06	0.108468	659823	0.12532	868260	0.111255	3.00637e+06	0.150278	1.88509e+06
221-4	0.11047	1.86911e+06	0.0970748	2.86078e+06	0.155502	1.06094e+06	0.0423522	1.19864e+06	0.123262	5.21028e+06	0.123155	1.00551e+06	0.126366	1.02298e+06	0.111874	3.38115e+06	0.100177	2.37782e+06
221-40	0.126777	1.07107e+06	0.102664	1.81932e+06	0.163632	732031	0.0587844	1.09595e+06	0.0864182	1.52932e+06	0.125373	659250	0.142789	1.20652e+06	0.109992	2.73892e+06	0.142906	911486
221-41	0.113127	1.41997e+06	0.0890355	1.91496e+06	0.154424	747328	0.0577848	442128	0.0855703	1.62485e+06	0.0987463	390498	0.136181	1.02015e+06	0.104732	3.21967e+06	0.128015	855760
221-42	0.108175	2.35589e+06	0.086063	2.68719e+06	0.144053	1.28749e+06	0.0593701	1.01569e+06	0.0886573	1.99726e+06	0.117453	1.12408e+06	0.126554	1.51051e+06	0.112234	3.48083e+06	0.133554	1.95695e+06
221-43	0.139872	1.49496e+06	0.0956441	2.33517e+06	0.143496	994762	0.0488749	837059	0.0825535	1.54037e+06	0.105874	714472	0.124211	1.14972e+06	0.11545	2.67903e+06	0.119281	1.27323e+06
221-44	0.112642	1.52396e+06	0.0881183	2.18015e+06	0.155967	1.04726e+06	0.0498046	1.69417e+06	0.0917109	1.95354e+06	0.118828	913647	0.131791	1.42667e+06	0.115044	3.37296e+06	0.141586	1.71283e+06
221-46	0.120982	1.81818e+06	0.0801127	2.1173e+06	0.147278	1.40176e+06	0.0487321	1.29486e+06	0.0845854	2.13222e+06	0.117058	1.03967e+06	0.125578	1.56098e+06	0.107889	3.49562e+06	0.118027	1.31882e+06
221-5	0.120327	1.91429e+06	0.0904728	2.42693e+06	0.143683	1.119e+06	0.0638306	1.48655e+06	0.087263	2.05152e+06	0.114447	1.01519e+06	0.12638	1.67478e+06	0.111567	3.75624e+06	0.092459	2.04257e+06
221-51	0.133238	1.40122e+06	0.0870791	1.77877e+06	0.16283	739517	0.0530712	483404	0.120334	3.88754e+06	0.123693	652887	0.138816	847495	0.113719	3.05654e+06	0.146927	1.14898e+06
221-52	0.118761	1.98012e+06	0.0954393	2.92515e+06	0.146174	806860	0.0680359	1.10769e+06	0.0835476	1.86748e+06	0.103762	650770	0.129044	973182	0.108126	3.00752e+06	0.132405	1.53649e+06
221-53	0.115289	1.46301e+06	0.0970988	2.22033e+06	0.127701	1.11399e+06	0.0749641	788537	0.131405	3.73152e+06	0.131434	868512	0.135662	1.35216e+06	0.117786	3.38027e+06	0.108428	1.25884e+06
221-55	0.118262	2.02494e+06	0.0956696	2.11023e+06	0.140503	1.1143e+06	0.0430787	992197	0.0807232	1.9019e+06	0.125118	877534	0.136845	1.4998e+06	0.112985	3.24871e+06	0.103202	1.64369e+06
221-56	0.137103	1.67512e+06	0.0954687	1.95281e+06	0.136286	1.35645e+06	0.0628454	1.48497e+06	0.0893163	2.15439e+06	0.12746	1.10853e+06	0.128073	1.38341e+06	0.115061	3.21548e+06	0.106379	2.11207e+06
221-57	0.112069	2.10379e+06	0.0950866	2.2182e+06	0.12906	1.40708e+06	0.0569782	1.35233e+06	0.0868554	1.81735e+06	0.133915	1.04076e+06	0.12774	1.28595e+06	0.111462	3.63047e+06	0.106972	1.92389e+06
221-59	0.129301	1.70131e+06	0.105051	2.0109e+06	0.140673	981508	0.0679921	1.29689e+06	0.0950169	1.6282e+06	0.124294	697769	0.138655	1.35659e+06	0.124035	3.20514e+06	0.113081	1.75322e+06
221-6	0.114113	2.13315e+06	0.0964056	2.48502e+06	0.140853	1.11159e+06	0.0396482	1.4256e+06	0.0885361	1.9244e+06	0.111476	956365	0.122324	1.30244e+06	0.116389	3.30402e+06	0.0963706	2.07316e+06
221-60	0.122783	2.0698e+06	0.10514	2.13745e+06	0.138876	1.10227e+06	0.0726557	1.16294e+06	0.0900965	1.82206e+06	0.122512	667092	0.137657	1.45027e+06	0.119601	3.46293e+06	0.114188	1.95854e+06
221-61	0.114823	2.25181e+06	0.0936389	2.27193e+06	0.132888	1.09592e+06	0.0479661	1.41672e+06	0.121357	4.74364e+06	0.127842	880550	0.130429	1.21145e+06	0.110059	3.57836e+06	0.109901	2.14847e+06
221-62	0.120975	1.9273e+06	0.0981285	2.32932e+06	0.136511	1.3356e+06	0.052322	1.01806e+06	0.0892007	1.78176e+06	0.125471	991724	0.136555	1.62909e+06	0.118418	3.66891e+06	0.10431	1.77157e+06
221-63	0.11607	1.43516e+06	0.106782	2.54543e+06	0.136558	843172	0.0511399	783381	0.085538	2.02445e+06	0.114663	721494	0.132382	1.01061e+06	0.112167	2.93299e+06	0.111126	1.39886e+06
221-64	0.119941	1.24532e+06	0.0925838	1.78184e+06	0.144306	754112	0.0447502	831822	0.0910298	1.69448e+06	0.118277	588646	0.143902	1.19922e+06	0.115486	3.23338e+06	0.101145	1.26849e+06
221-65	0.125046	1.44149e+06	0.0967738	2.44319e+06	0.115085	1.09447e+06	0.0449133	771588	0.0848771	1.9113e+06	0.102074	754108	0.120412	1.17568e+06	0.111851	3.13304e+06	0.108778	1.9312e+06
221-66	0.117049	2.05046e+06	0.0926711	2.35242e+06	0.127843	1.45875e+06	0.0501141	1.3539e+06	0.0927867	1.88406e+06	0.114292	994899	0.130423	1.68981e+06	0.119878	3.66039e+06	0.104889	1.9129e+06
221-67	0.134062	1.52993e+06	0.0976812	1.81295e+06	0.14534	852035	0.0605503	832327	0.0969212	1.695e+06	0.113417	653085	0.142641	1.25015e+06	0.118274	3.11793e+06	0.105682	1.62222e+06
221-68	0.110507	1.71912e+06	0.0947391	1.4272e+06	0.142345	690562	0.051872	746533	0.0916742	1.89796e+06	0.123559	802722	0.144861	1.29279e+06	0.111247	3.18068e+06	0.104345	1.21178e+06
221-69	0.110065	2.13623e+06	0.091734	2.39189e+06	0.128222	1.28097e+06	0.0597649	1.01953e+06	0.0964549	1.85248e+06	0.120281	887114	0.130635	1.28531e+06	0.12275	3.31093e+06	0.103128	1.67621e+06
221-7	0.124946	1.72468e+06	0.101503	2.6499e+06	0.147233	996464	0.0440279	1.26294e+06	0.0835542	1.77862e+06	0.105948	787869	0.127651	1.10846e+06	0.116166	3.05624e+06	0.0922063	1.45578e+06
221-70	0.111972	2.02849e+06	0.101211	2.78711e+06	0.127272	1.0917e+06	0.0475944	1.09635e+06	0.0908175	2.00039e+06	0.113365	694391	0.134409	1.29193e+06	0.109919	3.82557e+06	0.116017	1.96659e+06
221-71	0.122033	1.93772e+06	0.097528	2.18624e+06	0.142726	1.16406e+06	0.0530866	861273	0.141101	4.77276e+06	0.126393	904199	0.136774	1.21232e+06	0.135681	3.44981e+06	0.112054	2.21634e+06
221-72	0.114504	2.12485e+06	0.101492	2.29108e+06	0.139672	996933	0.060188	1.07712e+06	0.0918851	1.89604e+06	0.116995	985120	0.132328	1.29038e+06	0.116004	3.12746e+06	0.0977299	1.53826e+06
221-73	0.109865	1.83791e+06	0.0852423	1.86947e+06	0.137491	1.2931e+06	0.0549567	1.23635e+06	0.135875	4.79848e+06	0.128085	1.14812e+06	0.131198	1.2416e+06	0.123442	3.40942e+06	0.101667	1.46805e+06
221-74	0.123759	1.85726e+06	0.0916703	2.38555e+06	0.133719	1.38085e+06	0.0470876	900862	0.127226	5.39658e+06	0.116652	1.01423e+06	0.130364	1.62803e+06	0.121671	3.55585e+06	0.104211	2.23029e+06
221-75	0.108219	1.95557e+06	0.0930871	1.85692e+06	0.1443	747855	0.0567516	776166	0.104024	1.54206e+06	0.124162	729954	0.14376	1.31381e+06	0.131535	3.09095e+06	0.116094	1.96295e+06
221-77	0.126195	2.003e+06	0.0974119	2.35762e+06	0.136826	1.52735e+06	0.0531174	1.25418e+06	0.117318	4.82152e+06	0.116939	922343	0.127068	1.35724e+06	0.111291	3.60706e+06	0.0885988	2.49358e+06
221-78	0.122635	1.62857e+06	0.101946	2.24756e+06	0.125259	1.12882e+06	0.0467183	664565	0.0796875	1.81368e+06	0.105113	838529	0.124775	1.26417e+06	0.105675	2.94225e+06	0.0885044	2.47761e+06
221-8	0.117092	1.71552e+06	0.0970006	2.21476e+06	0.166541	1.03925e+06	0.0615617	772634	0.0954541	1.48374e+06	0.136858	1.06381e+06	0.139567	1.19979e+06	0.12808	3.42031e+06	0.0966003	1.45981e+06
221-80	0.123237	1.74509e+06	0.102211	2.10999e+06	0.146675	1.36437e+06	0.0635185	1.04372e+06	0.092628	1.79434e+06	0.129128	1.09128e+06	0.136746	1.50564e+06	0.127624	3.2273e+06	0.0962453	2.61026e+06
221-81	0.113916	1.74695e+06	0.104378	3.01058e+06	0.123342	1.06004e+06	0.0601837	921654	0.0827662	1.93413e+06	0.118243	772219	0.11701	849212	0.107394	3.00446e+06	0.0944865	2.78614e+06
221-82	0.119289	1.7683e+06	0.103893	3.09395e+06	0.127166	1.18976e+06	0.0746283	1.04417e+06	0.0828186	1.72083e+06	0.0973074	769427	0.123743	1.23182e+06	0.107591	3.04357e+06	0.0943208	2.23548e+06
221-83	0.122391	1.94168e+06	0.100781	2.44205e+06	0.14381	1.33998e+06	0.056173	1.63947e+06	0.120564	4.30039e+06	0.114634	875933	0.133894	1.53442e+06	0.116541	3.2628e+06	0.0883164	2.32108e+06
221-84	0.113882	1.91308e+06	0.104626	2.93979e+06	0.151189	1.43737e+06	0.0563666	867641	0.103492	2.05923e+06	0.132956	1.20838e+06	0.131924	1.16488e+06	0.136174	3.28664e+06	0.0941938	2.66279e+06
221-85	0.112732	1.92603e+06	0.0914085	1.90346e+06	0.134351	1.148e+06	0.0691158	955436	0.0806065	1.59704e+06	0.119857	877024	0.134139	1.34832e+06	0.114589	3.21554e+06	0.0917535	2.18307e+06
221-86	0.116938	1.78204e+06	0.104291	2.57114e+06	0.129869	1.14245e+06	0.0602574	928004	0.0869501	1.73065e+06	0.105757	857792	0.126475	1.18484e+06	0.1176	2.94024e+06	0.0882147	2.27748e+06
221-9	0.110231	1.73111e+06	0.0844568	2.20507e+06	0.145742	1.14079e+06	0.0404018	773004	0.0836362	2.00201e+06	0.121045	1.0712e+06	0.124688	1.18531e+06	0.109116	3.39069e+06	0.0932352	1.73017e+06
222-1	0.130409	1.85715e+06	0.0833465	1.83932e+06	0.14865	1.35188e+06	0.0479805	1.13687e+06	0.0834892	2.15223e+06	0.10246	874930	0.118057	1.19701e+06	0.109736	3.27675e+06	0.0869308	1.46411e+06
222-10	0.141558	1.40967e+06	0.0858437	1.46559e+06	0.15988	1.14016e+06	0.044064	738893	0.0874095	1.68263e+06	0.122567	699849	0.13189	1.0868e+06	0.107025	2.68618e+06	0.080419	994899
222-11	0.134898	1.73696e+06	0.0815232	1.55045e+06	0.165378	1.31983e+06	0.0668457	1.13628e+06	0.0870807	1.91043e+06	0.131584	1.01379e+06	0.129398	1.10736e+06	0.107892	3.05266e+06	0.0929058	1.34714e+06
222-120	0.151331	838480	0.084218	880419	0.15206	898865	0.0797232	473889	0.119767	2.99685e+06	0.118084	565373	0.142545	880587	0.114639	2.68125e+06	0.0815195	839195
222-121	0.130041	1.55355e+06	0.0919714	1.63442e+06	0.137641	1.37165e+06	0.0478869	829921	0.0856931	1.65525e+06	0.114024	724664	0.129867	1.07917e+06	0.109151	3.10756e+06	0.0872468	1.14311e+06
222-122	0.129568	1.39662e+06	0.0907342	2.23077e+06	0.138359	1.65022e+06	0.0646052	1.11389e+06	0.0863669	1.58392e+06	0.10852	739219	0.125103	1.25033e+06	0.114783	3.39579e+06	0.102487	1.87613e+06
222-123	0.140542	1.15972e+06	0.0847962	1.31726e+06	0.149167	1.18473e+06	0.0432391	843374	0.0857174	1.48241e+06	0.102067	580902	0.139151	1.00433e+06	0.115618	2.74196e+06	0.0769741	867355
222-124	0.127265	1.58178e+06	0.0975077	1.53114e+06	0.150433	1.04338e+06	0.0732853	824776	0.124371	4.49183e+06	0.13074	932589	0.142367	912826	0.108891	3.05661e+06	0.0950159	1.28112e+06
222-126	0.113306	1.0243e+06	0.0974067	909815	0.136682	1.0857e+06	0.0623946	384285	0.0964532	1.55943e+06	0.135382	963130	0.130893	754927	0.104498	2.82741e+06	0.0828722	835861
222-127	0.122359	1.86201e+06	0.0805608	1.55851e+06	0.136735	1.55465e+06	0.0576838	1.0931e+06	0.124363	5.11225e+06	0.120398	904057	0.126455	1.20769e+06	0.104995	2.87004e+06	0.0825021	1.12273e+06
222-128	0.136159	1.71422e+06	0.0868004	1.14065e+06	0.149906	1.33811e+06	0.0423605	580537	0.0842005	1.56894e+06	0.112123	685314	0.136461	1.16653e+06	0.109402	2.73006e+06	0.0811399	969425
222-129	0.122667	1.39162e+06	0.0988856	1.17961e+06	0.150588	968019	0.0625412	639654	0.0948668	1.39694e+06	0.122272	659073	0.144529	854903	0.107314	2.56232e+06	0.093796	1.13143e+06
222-13	0.139698	1.00996e+06	0.0884999	1.35535e+06	0.162327	976446	0.0571586	799598	0.082242	1.46254e+06	0.119367	551086	0.131616	849944	0.12822	2.42085e+06	0.0781088	934083
222-130	0.138679	1.63036e+06	0.090463	1.59782e+06	0.144683	1.39966e+06	0.0612435	943078	0.0919746	1.59423e+06	0.104384	629223	0.135729	1.17351e+06	0.112062	2.75304e+06	0.0999041	1.57571e+06
222-131	0.133509	1.4532e+06	0.088636	1.28655e+06	0.144409	1.1144e+06	0.0498246	852862	0.0890477	1.36615e+06	0.102953	507278	0.140727	879632	0.112972	2.64031e+06	0.0808753	838782
222-132	0.143658	1.76064e+06	0.0902475	1.68177e+06	0.151401	1.33736e+06	0.0668034	1.0241e+06	0.0897063	1.66454e+06	0.0999346	587573	0.135894	1.1325e+06	0.123072	3.24107e+06	0.0981989	1.36208e+06
222-133	0.134705	1.46373e+06	0.0903869	1.79347e+06	0.157202	1.44369e+06	0.0633985	1.35265e+06	0.133587	4.24031e+06	0.12097	794854	0.129408	880602	0.117008	2.85789e+06	0.0767995	870456
222-14	0.127843	1.63722e+06	0.0913881	2.66628e+06	0.14828	1.61253e+06	0.0516467	956732	0.0850379	2.31333e+06	0.100978	703574	0.119997	1.20909e+06	0.11565	3.3451e+06	0.0799419	1.22589e+06
222-15	0.121488	1.00857e+06	0.0868388	1.49561e+06	0.148196	1.19858e+06	0.050367	520733	0.092475	1.56253e+06	0.114717	635615	0.1383	773159	0.105643	2.71392e+06	0.0906408	973491
222-16	0.13522	1.12766e+06	0.0922953	1.14244e+06	0.162499	1.03751e+06	0.0694195	355341	0.0923873	1.48439e+06	0.110324	502892	0.144911	931513	0.112535	2.30243e+06	0.0950052	779925
222-17	0.149405	1.42113e+06	0.0852467	1.5388e+06	0.159805	1.32147e+06	0.0520763	845260	0.0928631	1.62622e+06	0.115537	720314	0.132805	1.21786e+06	0.110095	2.6413e+06	0.0794985	1.04275e+06
222-18	0.138226	1.59881e+06	0.0882766	1.60925e+06	0.148632	1.52439e+06	0.0489788	997331	0.0908775	1.75944e+06	0.111796	758625	0.125643	1.30685e+06	0.106302	2.79546e+06	0.0777083	1.04077e+06
222-19	0.120804	1.33537e+06	0.0786391	1.24917e+06	0.147233	1.18389e+06	0.0522799	535069	0.0869575	1.72245e+06	0.108112	642729	0.145375	850724	0.0998509	2.87705e+06	0.0823647	654843
222-21	0.130012	1.01094e+06	0.0848919	925207	0.162046	945851	0.0605106	380667	0.105743	2.63339e+06	0.123316	750471	0.134658	663999	0.103447	2.40159e+06	0.0818876	610713
222-22	0.137861	1.94812e+06	0.0769929	1.43592e+06	0.153855	1.35036e+06	0.0517168	1.13972e+06	0.128606	4.59428e+06	0.112595	846988	0.131458	1.38886e+06	0.111088	2.73781e+06	0.0876341	1.39855e+06
222-24	0.145741	893502	0.0858966	845992	0.155625	1.15127e+06	0.0650149	499432	0.0963027	1.24033e+06	0.118208	745871	0.133636	935691	0.097684	2.09395e+06	0.101127	1.14009e+06
222-25	0.13326	1.36718e+06	0.0790694	1.33811e+06	0.149512	1.41766e+06	0.0525104	883855	0.119201	4.6086e+06	0.128955	1.10301e+06	0.120663	949353	0.102647	2.88955e+06	0.0755881	937165
222-26	0.13175	1.16574e+06	0.0918745	1.32194e+06	0.161951	1.02934e+06	0.0567039	489469	0.095781	1.3867e+06	0.125064	690430	0.1441	853488	0.109464	2.61604e+06	0.0833849	786053
222-27	0.15158	1.24078e+06	0.08514	1.49723e+06	0.16101	1.28978e+06	0.0588565	826101	0.13171	4.11988e+06	0.130997	959967	0.13357	1.21236e+06	0.122147	2.78642e+06	0.0895449	1.16393e+06
222-28	0.116061	1.34776e+06	0.0957329	1.91836e+06	0.160146	857435	0.0625939	755878	0.114049	3.22797e+06	0.131627	826590	0.132998	1.04531e+06	0.101965	2.76218e+06	0.142946	896653
222-29	0.122824	1.36768e+06	0.0978884	1.50762e+06	0.150313	930375	0.0612562	575119	0.0913556	1.50047e+06	0.117526	452804	0.133091	1.07853e+06	0.0977615	2.50855e+06	0.129167	655093
222-3	0.132137	1.57475e+06	0.0907911	1.43757e+06	0.164866	1.19924e+06	0.072188	1.11494e+06	0.084821	1.8253e+06	0.10777	676786	0.131311	1.13587e+06	0.115453	2.76047e+06	0.0918474	1.47114e+06
222-30	0.123418	1.42579e+06	0.0935781	1.78708e+06	0.15937	1.20461e+06	0.0486491	658163	0.0864128	1.53835e+06	0.0770206	438667	0.127455	969520	0.118175	2.62373e+06	0.106518	684066
222-32	0.144851	1.32312e+06	0.0949903	1.55414e+06	0.159777	1.16897e+06	0.0629794	1.04121e+06	0.126397	3.32487e+06	0.0931281	458725	0.131062	931537	0.113783	2.58998e+06	0.134249	1.12827e+06
222-33	0.138192	1.35289e+06	0.0896142	1.83353e+06	0.1456	1.53049e+06	0.0564484	1.58135e+06	0.0832414	1.80608e+06	0.111518	901277	0.123749	1.1666e+06	0.10849	2.91181e+06	0.116923	1.0069e+06
222-34	0.119188	2.33312e+06	0.0892091	2.10461e+06	0.14555	1.6442e+06	0.052012	1.57943e+06	0.0874206	2.09836e+06	0.108229	1.0806e+06	0.119381	1.37286e+06	0.106605	3.35738e+06	0.134207	1.59864e+06
222-35	0.13349	1.12034e+06	0.0949202	1.76203e+06	0.167819	1.12603e+06	0.076927	1.07919e+06	0.0895456	1.35887e+06	0.0967638	475375	0.132237	852977	0.110419	2.1767e+06	0.125203	856384
222-36	0.143693	1.45305e+06	0.0912302	1.62115e+06	0.156487	1.23895e+06	0.0688442	1.36191e+06	0.0783164	1.63829e+06	0.116896	862912	0.13019	1.09986e+06	0.11652	2.55391e+06	0.116019	1.09258e+06
222-37	0.141076	1.38953e+06	0.0935602	1.68786e+06	0.152651	1.21589e+06	0.0494089	781716	0.0815221	1.61474e+06	0.0941253	577480	0.127125	1.08707e+06	0.111239	2.61513e+06	0.127693	1.15994e+06
222-38	0.121935	1.16899e+06	0.0903681	1.16063e+06	0.158247	963752	0.0701441	710701	0.0909841	1.31685e+06	0.113393	467980	0.132432	1.02846e+06	0.101895	2.6989e+06	0.133333	784849
222-39	0.133578	2.07131e+06	0.1004	2.65513e+06	0.164984	1.2082e+06	0.0753801	1.25445e+06	0.087392	1.87978e+06	0.102849	635133	0.131355	1.02478e+06	0.114084	3.40355e+06	0.131607	1.34529e+06
222-4	0.116016	1.5392e+06	0.092289	1.82459e+06	0.162884	1.10048e+06	0.0447627	984021	0.12277	5.18312e+06	0.107767	610313	0.128505	1.13977e+06	0.119695	2.91632e+06	0.0936117	1.50508e+06
222-40	0.136209	737997	0.0958496	1.40242e+06	0.171766	819621	0.0720852	645182	0.0950741	1.23066e+06	0.112811	464409	0.140831	983343	0.105268	2.45069e+06	0.129561	580632
222-41	0.127363	939246	0.0825243	1.14256e+06	0.157124	843745	0.0409691	380119	0.0901584	1.25091e+06	0.0980944	405625	0.137087	828611	0.102162	2.10601e+06	0.124672	550104
222-42	0.12828	1.60251e+06	0.0844919	1.72247e+06	0.149204	1.24898e+06	0.0632498	1.06921e+06	0.0858406	1.6335e+06	0.108907	570952	0.134176	964900	0.108439	2.74224e+06	0.125259	788027
222-43	0.154456	1.10837e+06	0.0801214	1.42315e+06	0.158028	1.08482e+06	0.0637887	843285	0.0836202	1.26665e+06	0.103776	545586	0.134369	1.02121e+06	0.12054	2.42003e+06	0.117798	539731
222-44	0.133445	1.22685e+06	0.0774266	1.72094e+06	0.159582	1.34881e+06	0.0585293	1.00723e+06	0.0846314	1.86566e+06	0.116138	924772	0.128969	1.23011e+06	0.112337	2.79346e+06	0.124265	1.33863e+06
222-46	0.131776	1.43964e+06	0.0787163	1.49094e+06	0.145398	1.37975e+06	0.0598211	997597	0.0837383	1.75023e+06	0.106191	813815	0.125782	1.03299e+06	0.107437	2.80763e+06	0.112119	566582
222-5	0.134062	1.61823e+06	0.0811266	1.70599e+06	0.15169	1.3342e+06	0.056296	1.26185e+06	0.0846273	1.8788e+06	0.121769	1.07623e+06	0.122115	1.32501e+06	0.114297	3.11756e+06	0.0832826	1.19069e+06
222-51	0.149825	1.14583e+06	0.0780188	1.22048e+06	0.172545	782525	0.0791817	600136	0.122758	3.03066e+06	0.122359	520807	0.137336	616598	0.10458	2.34061e+06	0.136958	693626
222-52	0.135079	1.51848e+06	0.0854094	1.68282e+06	0.171134	751320	0.0713347	911769	0.0955223	1.3402e+06	0.0963457	361403	0.14713	900355	0.115724	2.50834e+06	0.124494	719352
222-53	0.131061	806206	0.0926561	1.22845e+06	0.131482	1.09666e+06	0.0509313	648186	0.116823	3.09565e+06	0.122899	736877	0.136953	1.00114e+06	0.104808	2.91733e+06	0.108972	927842
222-55	0.140806	1.30591e+06	0.0908823	1.43202e+06	0.141456	1.16577e+06	0.040955	823389	0.0827636	1.66001e+06	0.10586	616377	0.136	1.11206e+06	0.113702	2.64879e+06	0.0899677	949623
222-56	0.149318	1.04971e+06	0.0924582	1.09743e+06	0.139284	1.27068e+06	0.068736	1.09351e+06	0.0957973	1.64122e+06	0.10274	467822	0.127644	811468	0.10902	2.42011e+06	0.0992839	1.11458e+06
222-57	0.125941	1.37809e+06	0.0906067	1.24824e+06	0.131092	1.35781e+06	0.0549293	1.00054e+06	0.0918398	1.45535e+06	0.108035	514140	0.124831	968633	0.10791	2.76758e+06	0.0955019	952560
222-59	0.138512	1.18605e+06	0.0992362	1.13134e+06	0.144988	1.01343e+06	0.0737719	774657	0.0981304	1.15181e+06	0.133511	613670	0.140703	975047	0.116819	2.44959e+06	0.100141	979326
222-6	0.122692	1.82021e+06	0.0827157	1.55188e+06	0.150134	1.28428e+06	0.0399281	935094	0.0856982	1.81557e+06	0.123015	979197	0.123879	1.40064e+06	0.118967	3.1278e+06	0.0844652	1.32427e+06
222-60	0.132144	1.34475e+06	0.0945619	1.10396e+06	0.145857	1.01553e+06	0.0826392	651165	0.0985365	1.28144e+06	0.135809	618028	0.140956	794477	0.110325	2.69843e+06	0.102673	1.08647e+06
222-61	0.134951	1.67642e+06	0.0892407	1.49952e+06	0.133839	1.31361e+06	0.0531375	914341	0.113773	3.75351e+06	0.109068	577324	0.123071	1.00331e+06	0.107346	2.96954e+06	0.102986	1.46733e+06
222-62	0.131703	1.2737e+06	0.091746	1.74197e+06	0.136414	1.31065e+06	0.0435611	690206	0.0895187	1.60723e+06	0.0968901	527264	0.136753	1.33087e+06	0.117177	3.01527e+06	0.0916226	1.03242e+06
222-63	0.13217	817779	0.098847	949265	0.146244	951567	0.0551414	593911	0.0939447	1.27761e+06	0.129489	604871	0.14493	798448	0.11102	2.50131e+06	0.0888921	589645
222-64	0.139976	830860	0.0854805	838612	0.149316	904207	0.0613524	521052	0.0959125	1.29565e+06	0.121628	529389	0.144751	818040	0.10675	2.43548e+06	0.0852032	700830
222-65	0.13456	1.00397e+06	0.0912802	1.03628e+06	0.127675	1.06535e+06	0.054006	525748	0.0896155	1.58898e+06	0.121437	630905	0.134969	931381	0.114915	2.63891e+06	0.0978733	1.25386e+06
222-66	0.132516	1.60658e+06	0.0860301	1.63452e+06	0.129052	1.58461e+06	0.0540972	820426	0.0930593	1.89816e+06	0.106758	833462	0.131351	1.29593e+06	0.109414	3.13326e+06	0.0944049	1.05932e+06
222-67	0.158343	1.20017e+06	0.0932135	1.10803e+06	0.150298	836003	0.0498487	537401	0.101365	1.36435e+06	0.120722	618245	0.144819	915116	0.113731	2.27517e+06	0.0946026	656162
222-68	0.133382	1.23435e+06	0.090181	830000	0.146954	823066	0.0669875	558046	0.0948255	1.59692e+06	0.126602	721769	0.145535	855327	0.102961	2.63862e+06	0.0842741	621689
222-69	0.131926	1.62675e+06	0.0908764	1.16637e+06	0.134752	1.07612e+06	0.064501	703996	0.0976643	1.57361e+06	0.11308	684379	0.135886	891030	0.10536	2.59038e+06	0.0883723	721563
222-7	0.149021	1.3717e+06	0.0943649	1.9027e+06	0.162173	1.19069e+06	0.053002	1.01106e+06	0.0822182	1.71812e+06	0.097671	594431	0.133483	1.20304e+06	0.123878	2.98939e+06	0.0779579	870571
222-70	0.127534	1.40594e+06	0.0989239	1.1686e+06	0.132456	970930	0.0525642	608308	0.0951228	1.59609e+06	0.107463	471339	0.132324	825411	0.113793	3.05765e+06	0.109608	1.11268e+06
222-71	0.142011	1.82128e+06	0.0873376	1.62448e+06	0.144424	1.26648e+06	0.0558316	852607	0.128932	4.84582e+06	0.116996	878858	0.136068	1.10586e+06	0.124368	3.18964e+06	0.104282	1.57218e+06
222-72	0.131823	1.88182e+06	0.0829284	1.33461e+06	0.143448	1.32286e+06	0.0538041	915046	0.0887311	1.87364e+06	0.113909	901654	0.136492	1.24611e+06	0.117551	2.84895e+06	0.0869329	894082
222-73	0.128884	1.39464e+06	0.0816134	1.15483e+06	0.140661	1.22555e+06	0.0588246	773278	0.150961	3.8498e+06	0.101844	530446	0.13442	839911	0.119736	2.85619e+06	0.0899059	725436
222-74	0.13489	1.51889e+06	0.0855621	1.62534e+06	0.13497	1.3909e+06	0.0503463	929113	0.124153	5.06532e+06	0.100902	649562	0.132949	1.16305e+06	0.118492	2.83267e+06	0.0910263	1.30392e+06
222-75	0.13143	1.45505e+06	0.0883355	985788	0.150221	700465	0.0670695	602618	0.100184	1.5248e+06	0.131653	634738	0.147359	829044	0.110564	2.78033e+06	0.108539	967450
222-77	0.140805	1.59627e+06	0.0939193	1.56408e+06	0.137486	1.44437e+06	0.0602673	976879	0.114094	3.57878e+06	0.108476	697504	0.125805	977815	0.110109	2.88978e+06	0.0822523	1.42158e+06
222-78	0.134943	1.60452e+06	0.0904482	1.33313e+06	0.130561	1.35981e+06	0.049883	540732	0.0842802	1.65652e+06	0.105547	751035	0.129456	1.17319e+06	0.109946	2.68437e+06	0.0863532	1.47372e+06
222-8	0.128891	1.00914e+06	0.0909144	1.29603e+06	0.171294	899029	0.0616096	516085	0.0939333	1.11765e+06	0.13377	683974	0.138759	1.01188e+06	0.107128	3.11076e+06	0.0696941	645573
222-80	0.13744	1.56778e+06	0.0951088	1.6533e+06	0.146162	1.49763e+06	0.0640218	1.00627e+06	0.0876968	1.67438e+06	0.128753	1.00235e+06	0.131414	1.22488e+06	0.117507	2.68987e+06	0.0917327	1.92544e+06
222-81	0.133827	1.44169e+06	0.0998832	1.50338e+06	0.136095	1.17302e+06	0.0739347	644769	0.0876457	1.85568e+06	0.124342	755813	0.130522	831944	0.115806	2.62301e+06	0.0868869	1.40506e+06
222-82	0.132825	1.7838e+06	0.0983293	2.17354e+06	0.134517	1.56261e+06	0.0654171	930634	0.0857222	1.58294e+06	0.0891245	658801	0.126748	1.37457e+06	0.118357	2.84878e+06	0.0939979	1.71735e+06
222-83	0.140226	1.75629e+06	0.0936114	1.77427e+06	0.147105	1.59995e+06	0.071701	1.06845e+06	0.122971	3.75942e+06	0.108304	770005	0.131643	1.34948e+06	0.116234	2.94247e+06	0.0853986	1.63867e+06
222-84	0.12907	1.60611e+06	0.0967819	1.94037e+06	0.148761	1.39476e+06	0.0570898	647545	0.101823	1.69008e+06	0.128069	920434	0.128368	940549	0.122308	2.71521e+06	0.0830523	1.77784e+06
222-85	0.129759	1.32233e+06	0.0856829	1.1359e+06	0.13891	1.01336e+06	0.0509631	605409	0.0846144	1.26242e+06	0.126627	897105	0.141981	973086	0.113832	2.4873e+06	0.0812851	1.202e+06
222-86	0.13706	1.71784e+06	0.0942317	1.50335e+06	0.138212	1.26167e+06	0.0570997	743921	0.0865678	1.50774e+06	0.0959498	655015	0.133626	1.14296e+06	0.120232	2.51676e+06	0.0803296	1.37046e+06
222-9	0.124921	1.21283e+06	0.0796519	1.28622e+06	0.164167	1.07983e+06	0.0410287	636232	0.0866219	1.58471e+06	0.104846	588570	0.131936	1.09775e+06	0.117046	2.96174e+06	0.0759405	918697
223-1	0.12482	1.25065e+06	0.100511	1.88686e+06	0.139472	1.27633e+06	0.0393822	369718	0.0830241	1.98603e+06	0.116762	769946	0.119243	1.07462e+06	0.110392	3.07146e+06	0.101013	2.29162e+06
223-10	0.120099	727232	0.0945764	1.50468e+06	0.153315	988707	0.0347165	279257	0.0933348	1.66698e+06	0.136856	817594	0.13004	1.4671e+06	0.109871	2.89794e+06	0.0932873	1.21008e+06
223-11	0.126289	1.0873e+06	0.0978703	1.48066e+06	0.164222	1.11154e+06	0.0544945	642450	0.089743	1.81125e+06	0.132091	863901	0.136011	1.20582e+06	0.119299	3.29471e+06	0.101712	1.84829e+06
223-120	0.120278	954844	0.10313	1.34732e+06	0.144191	792128	0.0578137	383707	0.11834	4.09385e+06	0.125371	695563	0.142102	1.15176e+06	0.113366	3.12468e+06	0.103009	1.34755e+06
223-121	0.117395	889151	0.0852671	1.74131e+06	0.134638	844420	0.0377799	386221	0.091236	1.8763e+06	0.131146	825015	0.138113	1.27647e+06	0.111926	3.46168e+06	0.0827686	2.18448e+06
223-122	0.120604	759243	0.0989747	2.29485e+06	0.136548	1.12968e+06	0.0557685	667775	0.0879561	1.81375e+06	0.115171	696562	0.129469	1.38603e+06	0.111356	3.51567e+06	0.111927	2.56482e+06
223-123	0.124113	668613	0.0987068	1.30606e+06	0.153065	945181	0.0382716	453216	0.102123	1.61801e+06	0.130012	612639	0.151149	1.17093e+06	0.126319	3.02499e+06	0.101808	1.35736e+06
223-124	0.117719	1.01852e+06	0.101968	2.00405e+06	0.141666	1.08448e+06	0.0576571	615682	0.121583	5.00777e+06	0.122959	660624	0.137228	1.39688e+06	0.11472	3.48063e+06	0.112773	2.20211e+06
223-126	0.113294	851235	0.0982767	1.7169e+06	0.137959	1.00748e+06	-1	-1	0.0933549	2.21244e+06	0.139628	1.10498e+06	0.133998	972944	0.107152	3.6514e+06	0.10637	1.39626e+06
223-127	0.111407	1.19904e+06	0.0955716	1.77564e+06	0.133182	1.09068e+06	0.0399245	923017	0.119629	5.47459e+06	0.122789	866621	0.129409	1.43764e+06	0.108528	3.47465e+06	0.0944323	1.52291e+06
223-128	0.120274	933350	0.0990988	1.11096e+06	0.148577	900934	-1	-1	0.0907393	1.62747e+06	0.125509	622906	0.143368	1.16689e+06	0.113285	3.13278e+06	0.100453	1.42128e+06
223-129	0.115971	968888	0.100273	1.98808e+06	0.13929	725487	-1	-1	0.09318	1.77614e+06	0.132772	838517	0.136095	1.2125e+06	0.111753	3.6291e+06	0.110237	1.9728e+06
223-13	0.133085	675699	0.101271	1.47949e+06	0.155212	902278	0.0375734	381617	0.0862964	1.52289e+06	0.126461	693760	0.128217	930153	0.116252	2.66521e+06	0.103651	1.38968e+06
223-130	0.127966	1.0365e+06	0.100976	1.73092e+06	0.143138	975566	0.0547983	673623	0.0913401	1.69856e+06	0.117945	626315	0.141717	1.29451e+06	0.114871	3.09882e+06	0.113855	2.32782e+06
223-131	0.11525	771118	0.0973666	1.52191e+06	0.140956	877711	0.0569974	379890	0.0882113	1.78285e+06	0.119736	556512	0.138033	1.19719e+06	0.108653	3.24627e+06	0.10768	1.40841e+06
223-132	0.132879	1.34657e+06	0.100422	1.91352e+06	0.148241	904874	0.0651902	749090	0.0940054	1.77623e+06	0.118672	533692	0.144529	1.36352e+06	0.120795	3.55354e+06	0.112678	2.01574e+06
223-133	0.12555	842979	0.0959612	1.97197e+06	0.1509	1.09628e+06	0.0587159	797297	0.134755	4.5367e+06	0.14063	980908	0.135138	970793	0.122027	3.15415e+06	0.10513	1.48374e+06
223-14	0.12993	981525	0.100087	3.41522e+06	0.141944	1.315e+06	0.0419469	389104	0.0869755	2.13391e+06	0.112784	698304	0.122875	962459	0.10714	3.30718e+06	0.10466	1.82784e+06
223-15	0.115021	1.01239e+06	0.0951426	2.06515e+06	0.135057	1.0774e+06	-1	-1	0.100992	2.77719e+06	0.120429	804017	0.128731	857717	0.105726	3.17945e+06	0.11136	1.90106e+06
223-16	0.135719	1.27625e+06	0.098193	2.28646e+06	0.15222	1.03253e+06	0.0424792	365819	0.0828167	1.69797e+06	0.12448	694705	0.140795	1.05463e+06	0.112281	3.12144e+06	0.109138	1.93127e+06
223-17	0.133591	894522	0.0936612	1.67047e+06	0.155713	1.18028e+06	0.0581124	399571	0.0928402	1.66275e+06	0.11598	553496	0.145182	1.28337e+06	0.109747	3.15642e+06	0.0976632	1.38729e+06
223-18	0.121598	863596	0.0930438	1.85766e+06	0.144	1.3529e+06	0.0562048	381331	0.0917527	1.98692e+06	0.115604	559731	0.126313	1.32399e+06	0.108111	3.26032e+06	0.0975717	1.32719e+06
223-19	0.116954	1.25409e+06	0.0937679	2.03755e+06	0.137588	1.15022e+06	0.0572155	352874	0.0892534	2.11025e+06	0.115694	719618	0.131313	1.04358e+06	0.0992116	3.41463e+06	0.0978684	1.54904e+06
223-21	0.124788	1.00519e+06	0.0921752	1.38358e+06	0.155696	940326	-1	-1	0.113444	3.97667e+06	0.130344	914710	0.146383	911152	0.108518	3.31695e+06	0.0951025	958111
223-22	0.124096	1.20016e+06	0.0842161	1.53249e+06	0.144429	1.1237e+06	0.0475096	580788	0.117355	4.28473e+06	0.11265	740279	0.140933	1.35563e+06	0.112216	3.32459e+06	0.100133	1.77509e+06
223-24	0.134636	661953	0.0776078	1.1269e+06	0.150935	1.14003e+06	0.0609766	452167	0.0908757	1.72641e+06	0.118855	697833	0.150143	1.22775e+06	0.102776	2.58271e+06	0.112196	1.58547e+06
223-25	0.120946	826458	0.0855401	1.63579e+06	0.145607	1.29927e+06	0.0413022	454914	0.11458	4.71894e+06	0.134402	1.07856e+06	0.136424	953080	0.103841	3.162e+06	0.0958922	1.4006e+06
223-26	0.128851	1.06268e+06	0.10063	2.29109e+06	0.146363	886517	0.0352226	381199	0.0956216	1.71483e+06	0.129648	717968	0.137772	989451	0.113657	2.93579e+06	0.101566	1.35867e+06
223-27	0.133982	800268	0.0945182	1.55533e+06	0.15553	1.12098e+06	0.0728849	721676	0.120193	4.34023e+06	0.128692	747038	0.140221	1.27442e+06	0.111999	3.2317e+06	0.106791	1.57339e+06
223-28	0.115814	1.25961e+06	0.107055	2.43973e+06	0.15172	836820	0.0669914	1.40663e+06	0.117797	4.96715e+06	0.136753	1.00273e+06	0.135538	1.36753e+06	0.110726	3.726e+06	0.172998	1.67503e+06
223-29	0.117319	1.23539e+06	0.102943	1.7768e+06	0.147132	934105	0.0534075	561421	0.0872767	1.88655e+06	0.131189	609448	0.131906	1.4471e+06	0.104554	3.26603e+06	0.145457	1.33408e+06
223-3	0.124909	1.00643e+06	0.099416	1.59874e+06	0.163137	981251	0.0720846	541542	0.0864935	1.66411e+06	0.129586	753314	0.13569	1.37629e+06	0.118038	2.90865e+06	0.110679	1.84888e+06
223-30	0.125819	1.02471e+06	0.114216	2.04651e+06	0.15599	857649	0.0540988	393565	0.0926703	1.46462e+06	0.121037	541640	0.132044	947354	0.114537	2.55801e+06	0.138672	976887
223-32	0.126469	897832	0.104518	1.5086e+06	0.16094	885582	0.0651404	478561	0.122767	3.41692e+06	0.13147	626829	0.133335	1.09007e+06	0.116722	3.01117e+06	0.149818	1.13558e+06
223-33	0.111703	832933	0.101341	1.74002e+06	0.149412	1.0993e+06	0.0538313	767012	0.0945259	1.65555e+06	0.130101	686819	0.136213	1.27603e+06	0.110495	2.77309e+06	0.136735	1.12292e+06
223-34	0.116561	1.12451e+06	0.100977	2.12729e+06	0.136895	1.14932e+06	0.0617475	896642	0.094639	1.97389e+06	0.118212	791804	0.124873	1.56319e+06	0.109952	3.38916e+06	0.158109	1.62073e+06
223-35	0.117367	949950	0.107164	1.76903e+06	0.170725	892019	0.0744364	610277	0.089926	1.48827e+06	0.144651	776055	0.13645	1.01031e+06	0.109882	2.75959e+06	0.157188	1.33077e+06
223-36	0.131053	949060	0.102427	1.9718e+06	0.150433	1.02948e+06	0.0628626	854012	0.086212	1.56215e+06	0.127107	687686	0.131271	1.42307e+06	0.117698	2.6644e+06	0.145364	1.46283e+06
223-37	0.131104	731104	0.106706	1.86036e+06	0.155321	984167	0.0489924	712271	0.0966703	1.53798e+06	0.111156	572339	0.138403	1.25584e+06	0.120594	2.26e+06	0.154655	1.54369e+06
223-38	0.111862	974307	0.101134	1.61319e+06	0.147565	1.07244e+06	0.0513339	519443	0.0926759	1.53826e+06	0.125497	676808	0.131121	1.50318e+06	0.109399	3.06785e+06	0.144714	1.26926e+06
223-39	0.134216	1.55538e+06	0.114435	3.00759e+06	0.149373	845250	0.0608816	680637	0.0916921	1.92167e+06	0.109412	518636	0.128629	819087	0.1138	2.88664e+06	0.168767	1.94432e+06
223-4	0.123809	1.09475e+06	0.101122	2.42384e+06	0.157099	953198	0.0333196	279963	0.115981	4.83031e+06	0.126016	801135	0.122598	1.01267e+06	0.110114	2.97405e+06	0.108176	2.29382e+06
223-40	0.119435	818516	0.101843	1.44235e+06	0.156995	728168	0.0556984	439422	0.0908504	1.4499e+06	0.140087	538916	0.138088	1.37955e+06	0.106506	2.6908e+06	0.150786	1.12486e+06
223-41	0.130742	759572	0.0907645	1.6142e+06	0.153978	795775	-1	-1	0.0870863	1.59716e+06	0.109225	415430	0.13958	1.14175e+06	0.105272	2.86437e+06	0.13509	942840
223-42	0.114449	909957	0.0924086	2.08794e+06	0.149631	936052	0.0703534	544182	0.0950115	1.72067e+06	0.126617	665133	0.130173	1.23469e+06	0.106774	3.37341e+06	0.14327	1.44236e+06
223-43	0.130871	664959	0.0991569	1.71878e+06	0.163456	670208	0.0678565	338556	0.0929707	1.25721e+06	0.112466	436904	0.138581	855696	0.115499	2.40432e+06	0.136537	1.07142e+06
223-44	0.125305	789979	0.0898014	1.78449e+06	0.146685	971796	0.0410298	913887	0.0880842	1.9294e+06	0.10396	710066	0.131945	1.34364e+06	0.114478	3.26003e+06	0.149313	1.83076e+06
223-46	0.119191	758614	0.0887402	1.61027e+06	0.148162	984271	0.0574779	557009	0.0948785	1.85476e+06	0.114676	601955	0.132828	1.28655e+06	0.104174	3.28717e+06	0.130354	1.0281e+06
223-5	0.118343	904691	0.0964651	1.92069e+06	0.146184	848820	0.0434949	620721	0.0872099	1.8876e+06	0.129741	724004	0.129466	1.51421e+06	0.110643	3.30583e+06	0.0960553	1.64374e+06
223-51	0.137612	772554	0.08486	1.46773e+06	0.17005	730328	-1	-1	0.117034	3.49101e+06	0.129531	732341	0.139684	844662	0.112663	2.99052e+06	0.154129	1.20509e+06
223-52	0.135248	1.28039e+06	0.0962134	2.55954e+06	0.149705	631081	0.0750838	711562	0.0866181	1.84829e+06	0.110206	484418	0.136494	944456	0.108089	3.01279e+06	0.145272	1.45658e+06
223-53	0.135553	660555	0.10038	1.63476e+06	0.126095	951555	0.0763077	476079	0.128203	3.92492e+06	0.135425	850425	0.136766	1.21873e+06	0.114943	3.28058e+06	0.107745	1.25132e+06
223-55	0.124566	754779	0.104675	1.4759e+06	0.14736	831012	0.0482712	376932	0.100435	1.77972e+06	0.123366	468221	0.14603	1.08151e+06	0.115259	2.85407e+06	0.109186	1.30898e+06
223-56	0.14063	748613	0.10083	955956	0.13658	951950	0.0815101	590232	0.100098	1.39951e+06	0.137669	631535	0.130398	853534	0.112904	2.59225e+06	0.109059	1.38858e+06
223-57	0.115641	939239	0.10131	1.53663e+06	0.129624	1.20914e+06	0.0727588	692059	0.0973015	1.35247e+06	0.140176	636521	0.13376	925300	0.108932	3.4766e+06	0.115607	1.68101e+06
223-59	0.124147	770238	0.10423	1.2908e+06	0.138935	933799	0.0616734	475973	0.105113	1.47408e+06	0.13125	654605	0.139192	1.26143e+06	0.123435	3.03161e+06	0.119496	1.62894e+06
223-6	0.118169	1.26575e+06	0.103456	1.74157e+06	0.140888	1.09692e+06	-1	-1	0.0839034	1.75489e+06	0.130451	742724	0.120306	1.33566e+06	0.109512	3.14306e+06	0.103223	1.89574e+06
223-60	0.121887	954019	0.105402	1.4183e+06	0.132886	979663	0.0851853	692942	0.0955671	1.47977e+06	0.135174	614220	0.134393	1.22877e+06	0.111029	3.53452e+06	0.116713	1.62971e+06
223-61	0.123475	1.11324e+06	0.0995087	1.69177e+06	0.139398	1.00561e+06	0.0618523	492998	0.116271	3.49245e+06	0.134744	486191	0.138557	875933	0.111321	3.18652e+06	0.121982	1.9072e+06
223-62	0.118717	896308	0.105944	1.91308e+06	0.133686	1.04937e+06	-1	-1	0.0930494	1.62054e+06	0.127401	546300	0.136891	1.34543e+06	0.111865	3.32571e+06	0.108581	1.42149e+06
223-63	0.128824	614368	0.115057	1.89213e+06	0.144234	770421	-1	-1	0.0925395	1.68037e+06	0.136203	612389	0.137123	894222	0.115328	2.63777e+06	0.120135	1.20062e+06
223-64	0.126047	545755	0.0945833	1.1377e+06	0.141372	814557	-1	-1	0.0957826	1.44616e+06	0.129827	519730	0.141765	1.18509e+06	0.111537	2.86635e+06	0.103471	1.29864e+06
223-65	0.132274	950856	0.0994288	1.92595e+06	0.118414	1.02702e+06	0.051944	354773	0.0893571	1.95153e+06	0.110752	609332	0.113418	1.16046e+06	0.110646	2.94455e+06	0.116499	1.93181e+06
223-66	0.113963	783036	0.0945355	1.72498e+06	0.130314	1.13511e+06	0.0573378	480135	0.0940263	1.9044e+06	0.120195	753108	0.133554	1.47226e+06	0.113376	3.23474e+06	0.112273	1.74823e+06
223-67	0.145385	701548	0.100028	1.22846e+06	0.144993	800135	0.0591465	478050	0.0992557	1.54246e+06	0.121084	568357	0.144335	1.18969e+06	0.117147	2.64073e+06	0.113081	1.40651e+06
223-68	0.118504	1.04079e+06	0.0943432	1.07294e+06	0.138763	673051	0.061467	393132	0.0942905	1.85716e+06	0.132951	770440	0.143356	1.26005e+06	0.10886	3.10936e+06	0.106627	1.18032e+06
223-69	0.126203	1.14415e+06	0.0987683	2.41893e+06	0.130722	1.09636e+06	0.0568874	474491	0.0988551	1.90041e+06	0.125416	796727	0.12628	1.22364e+06	0.119844	2.85616e+06	0.109538	1.71848e+06
223-7	0.128113	853670	0.108788	2.1589e+06	0.156124	947080	0.0343037	329446	0.0872546	1.62214e+06	0.110627	534662	0.13094	1.02923e+06	0.116429	2.75805e+06	0.0951749	1.27306e+06
223-70	0.109979	1.24071e+06	0.103397	1.6865e+06	0.122021	965282	-1	-1	0.0908233	2.19662e+06	0.1135	651341	0.125952	1.26643e+06	0.103795	3.83571e+06	0.120448	1.84811e+06
223-71	0.135518	1.34503e+06	0.101438	1.87968e+06	0.143845	1.04388e+06	0.056453	516110	0.132739	5.06681e+06	0.121706	727758	0.14056	1.10508e+06	0.127697	3.34108e+06	0.121233	2.19365e+06
223-72	0.127841	1.40399e+06	0.0987885	1.53403e+06	0.132615	904831	0.0568829	485470	0.089866	1.94078e+06	0.108236	701457	0.129164	1.19064e+06	0.10823	3.01205e+06	0.102109	1.40264e+06
223-73	0.120831	1.02827e+06	0.0944608	1.48483e+06	0.140796	973646	0.0718825	420895	0.130372	4.67546e+06	0.139822	828000	0.139893	1.02076e+06	0.117258	3.14601e+06	0.105165	1.01436e+06
223-74	0.123463	812165	0.0940819	1.71502e+06	0.130519	976905	0.0520334	481868	0.120767	5.04872e+06	0.116774	588977	0.131142	1.33364e+06	0.113987	3.19588e+06	0.113992	1.80858e+06
223-75	0.125961	850752	0.100251	1.1347e+06	0.14993	576609	0.0640535	399885	0.112666	1.57981e+06	0.130881	673507	0.151034	1.23054e+06	0.126855	2.95182e+06	0.121454	1.69662e+06
223-77	0.132077	1.2395e+06	0.10548	1.58993e+06	0.136409	1.10452e+06	-1	-1	0.11379	4.39847e+06	0.123333	720621	0.135997	997606	0.112232	3.25034e+06	0.0996303	1.96715e+06
223-78	0.12269	1.1151e+06	0.10462	1.58714e+06	0.123471	796665	0.050305	383512	0.0807458	1.97235e+06	0.116232	705188	0.123536	1.05994e+06	0.106831	2.82126e+06	0.0983454	1.87554e+06
223-8	0.120176	824029	0.0971289	1.937e+06	0.159203	925907	0.0549973	404254	0.0966909	1.50532e+06	0.137123	979233	0.130764	1.2213e+06	0.113773	3.61363e+06	0.0917297	1.11175e+06
223-80	0.135659	918383	0.10431	1.60686e+06	0.1395	1.1179e+06	0.0663646	783589	0.090596	1.77187e+06	0.130473	988083	0.134659	1.33329e+06	0.123209	3.0027e+06	0.104749	2.51162e+06
223-81	0.12838	1.2268e+06	0.10915	2.34755e+06	0.124699	913507	0.0455189	403344	0.0843705	1.91105e+06	0.121526	713311	0.118864	786728	0.111038	2.86771e+06	0.106024	2.4985e+06
223-82	0.128837	1.30639e+06	0.109243	2.57918e+06	0.124853	1.06412e+06	0.0538069	667925	0.0835568	1.91781e+06	0.107839	652063	0.115426	1.33147e+06	0.108169	2.99158e+06	0.104158	1.77383e+06
223-83	0.136409	1.17638e+06	0.104141	1.7223e+06	0.139517	1.03935e+06	0.0527456	661862	0.116388	4.35024e+06	0.119849	799736	0.136091	1.33258e+06	0.116896	3.12195e+06	0.0944472	2.06083e+06
223-84	0.129831	1.11493e+06	0.102323	2.09464e+06	0.139797	1.19612e+06	0.0632173	504338	0.0973438	2.0512e+06	0.129459	924045	0.127288	1.01408e+06	0.121182	3.14139e+06	0.104733	2.09076e+06
223-85	0.123324	1.18064e+06	0.100239	1.75585e+06	0.137154	975289	0.0589842	560363	0.0862371	1.55424e+06	0.132058	791898	0.14156	1.26079e+06	0.115116	3.02188e+06	0.0990225	1.9453e+06
223-86	0.12626	1.08863e+06	0.107054	1.50769e+06	0.127583	826651	0.0626162	570837	0.0893519	1.68085e+06	0.115139	673747	0.129642	1.03689e+06	0.112447	2.60372e+06	0.0951071	1.65606e+06
223-9	0.118998	749205	0.0976359	1.74287e+06	0.15871	990794	-1	-1	0.087294	1.73056e+06	0.131894	568719	0.132606	995283	0.11129	2.97593e+06	0.102001	1.39848e+06
224-1	0.122505	2.01974e+06	0.0873541	2.55102e+06	0.138113	1.52773e+06	0.0670374	2.35981e+06	0.11229	5.90634e+06	0.12433	1.38063e+06	0.105613	1.41081e+06	0.105868	4.06211e+06	0.0871613	2.53697e+06
224-10	0.120925	2.58742e+06	0.0794526	2.43035e+06	0.129271	1.79595e+06	0.0528174	1.90023e+06	0.0999542	5.7033e+06	0.122664	1.70981e+06	0.101053	1.77572e+06	0.0971029	4.7142e+06	0.0849971	2.45952e+06
224-11	0.121587	2.38984e+06	0.0832361	2.32029e+06	0.146966	1.50203e+06	0.071984	2.18671e+06	0.111304	5.29532e+06	0.124414	1.60905e+06	0.109047	1.41985e+06	0.103506	4.03945e+06	0.0919758	2.40055e+06
224-120	0.109364	1.44586e+06	0.0864955	1.26127e+06	0.117187	1.18106e+06	0.0797522	1.03621e+06	0.107555	4.2509e+06	0.109889	1.23125e+06	0.107723	1.2104e+06	0.0987556	4.09559e+06	0.0931158	1.62127e+06
224-121	0.115323	2.13029e+06	0.0846622	2.25434e+06	0.12572	1.7369e+06	0.0647507	1.49291e+06	0.108505	4.64728e+06	0.118461	1.32781e+06	0.112602	1.40556e+06	0.104484	4.10474e+06	0.090428	2.3843e+06
224-122	0.100707	2.06493e+06	0.0819487	3.11446e+06	0.112214	2.30786e+06	0.0646178	1.40711e+06	0.105207	5.60963e+06	0.109701	1.71635e+06	0.100451	1.79973e+06	0.101803	4.86388e+06	0.0921931	3.48543e+06
224-123	0.116181	1.39859e+06	0.0810902	2.02086e+06	0.133413	1.69296e+06	0.0552417	1.50308e+06	0.117014	5.06652e+06	0.125171	1.18744e+06	0.119542	1.33513e+06	0.110066	3.5849e+06	0.0868247	1.7306e+06
224-124	0.107482	2.44866e+06	0.0859641	2.82796e+06	0.117515	1.63624e+06	0.0625526	1.01824e+06	0.101722	5.71687e+06	0.115914	1.61743e+06	0.107134	1.62137e+06	0.0940712	5.04779e+06	0.0947744	2.58608e+06
224-126	0.103565	1.63664e+06	0.0839867	2.13417e+06	0.122435	1.25934e+06	0.0669136	858300	0.106932	5.56667e+06	0.126797	1.5216e+06	0.108197	1.05114e+06	0.098088	4.38231e+06	0.0921841	1.62063e+06
224-127	0.0965371	3.12731e+06	0.0725555	2.40199e+06	0.1014	2.86659e+06	0.0647663	2.01886e+06	0.0997462	7.94508e+06	0.10656	2.38383e+06	0.095356	2.18105e+06	0.0911129	6.34554e+06	0.0813757	2.56129e+06
224-128	0.117197	2.15496e+06	0.0811737	2.04643e+06	0.124444	1.88512e+06	0.0512459	1.87234e+06	0.107014	4.75275e+06	0.118484	1.36297e+06	0.111364	1.5636e+06	0.10058	4.15494e+06	0.0915109	2.13406e+06
224-129	0.0955839	2.57774e+06	0.090238	2.96583e+06	0.110635	1.74867e+06	0.0821708	1.49932e+06	0.0967475	7.85776e+06	0.116835	1.76039e+06	0.103424	1.70424e+06	0.0920071	6.9619e+06	0.0934309	2.67878e+06
224-13	0.116378	1.75906e+06	0.0832879	2.24454e+06	0.129508	1.61045e+06	0.0626208	2.32554e+06	0.114705	5.4184e+06	0.119826	1.52743e+06	0.100126	1.45843e+06	0.108569	4.23897e+06	0.0856378	2.24563e+06
224-130	0.121378	2.24384e+06	0.0867235	2.49679e+06	0.129978	1.72036e+06	0.0825363	1.82786e+06	0.114835	4.67488e+06	0.113065	1.08214e+06	0.117257	1.42632e+06	0.108165	3.85763e+06	0.0971101	2.83251e+06
224-131	0.106079	2.18515e+06	0.0792581	2.22802e+06	0.115862	1.97917e+06	0.0635104	1.79549e+06	0.110194	5.47437e+06	0.112194	1.38069e+06	0.106271	1.58669e+06	0.104606	4.26734e+06	0.0877619	2.03849e+06
224-132	0.127071	2.33493e+06	0.0828438	2.46454e+06	0.133237	1.81587e+06	0.0595589	1.10247e+06	0.113052	5.27104e+06	0.121349	1.29477e+06	0.116489	1.52493e+06	0.109377	4.15657e+06	0.093463	2.54872e+06
224-133	0.104153	2.00029e+06	0.0817277	3.13011e+06	0.119868	2.10574e+06	0.0647211	1.352e+06	0.101602	5.83301e+06	0.118833	1.73985e+06	0.100081	1.3125e+06	0.0969563	4.99355e+06	0.0890024	2.07461e+06
224-14	0.114021	2.37704e+06	0.0857656	3.56333e+06	0.139062	1.79475e+06	0.0655908	1.78688e+06	0.106513	5.95026e+06	0.111052	1.43911e+06	0.116181	1.43665e+06	0.10839	4.17804e+06	0.0855247	2.40369e+06
224-15	0.106064	1.93186e+06	0.0844892	2.32452e+06	0.125207	1.63317e+06	0.0552588	2.05188e+06	0.098537	5.37838e+06	0.113441	1.36963e+06	0.107319	1.27465e+06	0.0969314	4.92241e+06	0.0965767	2.16753e+06
224-16	0.126016	1.71321e+06	0.0853709	2.24601e+06	0.142864	1.35749e+06	0.0588228	1.36149e+06	0.111873	4.30042e+06	0.122831	982955	0.12721	1.30192e+06	0.108138	3.62785e+06	0.0988683	1.85035e+06
224-17	0.120623	2.36298e+06	0.0807586	2.38387e+06	0.128496	1.9138e+06	0.0655781	1.80586e+06	0.106676	5.75074e+06	0.104692	1.62341e+06	0.100894	1.981e+06	0.104083	4.47417e+06	0.0843146	2.60272e+06
224-18	0.121275	2.36148e+06	0.0810711	2.31261e+06	0.132039	1.86305e+06	0.061824	2.05333e+06	0.105468	5.81811e+06	0.107884	1.51765e+06	0.106637	1.83728e+06	0.105244	4.18813e+06	0.0855637	2.55148e+06
224-19	0.103946	2.60019e+06	0.0731433	2.12981e+06	0.11487	2.31257e+06	0.0675982	1.75342e+06	0.0808943	6.99547e+06	0.107949	1.65861e+06	0.0975037	1.75626e+06	0.0825842	6.94715e+06	0.085329	2.12149e+06
224-21	0.111727	1.76585e+06	0.0823477	1.57248e+06	0.136508	1.2013e+06	0.0480173	1.57223e+06	0.0926746	4.33008e+06	0.119844	1.14967e+06	0.111031	976760	0.0933848	4.14865e+06	0.0837213	1.206e+06
224-22	0.108759	3.39942e+06	0.0743613	2.3947e+06	0.114926	2.59358e+06	0.0669311	1.84097e+06	0.0981293	7.83782e+06	0.101563	2.11204e+06	0.0927417	2.51927e+06	0.0922407	6.04547e+06	0.080216	2.70297e+06
224-24	0.114511	1.16854e+06	0.0719414	1.21408e+06	0.138531	1.25726e+06	0.0616412	1.26304e+06	0.11086	3.99635e+06	0.121021	1.12225e+06	0.128317	1.08086e+06	0.100253	3.3205e+06	0.096303	1.73765e+06
224-25	0.102887	2.15719e+06	0.0718136	1.94866e+06	0.124457	1.95788e+06	-1	-1	0.105819	6.07537e+06	0.109712	2.06507e+06	0.0952082	1.75093e+06	0.0959298	4.45171e+06	0.0782584	2.02279e+06
224-26	0.121577	1.8572e+06	0.0881106	2.79798e+06	0.14046	1.23328e+06	0.0764475	1.25286e+06	0.107269	5.07894e+06	0.122128	1.06701e+06	0.12096	1.29863e+06	0.101801	3.99462e+06	0.0904134	1.73327e+06
224-27	0.115662	2.55753e+06	0.0747409	2.54008e+06	0.128538	1.89576e+06	0.0649964	1.40585e+06	0.106597	5.78984e+06	0.110278	1.84674e+06	0.101134	2.03944e+06	0.104162	4.62094e+06	0.0899383	2.88411e+06
224-28	0.112047	2.13894e+06	0.0901093	3.04008e+06	0.145654	1.1094e+06	0.0864733	1.53815e+06	0.102798	5.36098e+06	0.128642	1.28541e+06	0.116309	1.3481e+06	0.0998593	4.16908e+06	0.157338	1.44283e+06
224-29	0.106002	2.40737e+06	0.0895921	2.79659e+06	0.128454	1.41938e+06	0.0657792	1.55245e+06	0.0963893	5.10681e+06	0.118625	1.26849e+06	0.109178	1.56156e+06	0.0948807	4.31275e+06	0.143707	1.5489e+06
224-3	0.120732	2.49174e+06	0.088104	2.20886e+06	0.147114	1.47122e+06	0.0541982	3.44727e+06	0.111385	4.94028e+06	0.125974	1.45041e+06	0.114075	1.50043e+06	0.11003	3.88185e+06	0.0922799	2.84602e+06
224-30	0.117463	2.03716e+06	0.0955064	2.21069e+06	0.145854	1.39386e+06	0.0586601	2.5566e+06	0.11674	4.75072e+06	0.118671	990901	0.110548	1.19596e+06	0.113271	3.30137e+06	0.123191	1.45381e+06
224-32	0.11331	2.25504e+06	0.0884341	2.49637e+06	0.129161	1.67563e+06	0.069064	1.85336e+06	0.0995498	4.80356e+06	0.114882	1.4884e+06	0.0997144	1.5081e+06	0.0984613	4.54186e+06	0.136688	1.9505e+06
224-33	0.12021	1.76946e+06	0.0859538	2.25057e+06	0.128654	1.80232e+06	0.0555859	3.20647e+06	0.115305	5.84014e+06	0.115528	1.68196e+06	0.105649	1.54231e+06	0.107079	3.99376e+06	0.127359	1.53387e+06
224-34	0.1	3.52664e+06	0.0810739	3.03649e+06	0.112304	2.58025e+06	0.0737087	2.07594e+06	0.0997255	9.0049e+06	0.102737	2.28046e+06	0.0926282	2.40756e+06	0.0890088	6.78672e+06	0.132646	2.51325e+06
224-35	0.110728	2.04095e+06	0.0915282	2.67334e+06	0.140299	1.5417e+06	0.0823673	1.8692e+06	0.108621	4.50095e+06	0.122593	1.36459e+06	0.107367	1.34835e+06	0.109642	3.48868e+06	0.137859	1.82333e+06
224-36	0.102629	2.74875e+06	0.0836587	2.75346e+06	0.115196	2.31181e+06	0.0610183	1.29141e+06	0.0977853	7.06736e+06	0.10877	2.16241e+06	0.0969145	2.04793e+06	0.107846	5.04169e+06	0.124537	1.98234e+06
224-37	0.121273	1.86913e+06	0.0925792	2.41655e+06	0.139473	1.49329e+06	0.0648677	2.50735e+06	0.11229	5.46496e+06	0.117687	1.18663e+06	0.112967	1.36046e+06	0.113923	3.34953e+06	0.139817	1.84262e+06
224-38	0.105293	2.11969e+06	0.0873286	2.20453e+06	0.127232	1.5803e+06	0.0680062	1.79083e+06	0.101094	5.50083e+06	0.114707	1.43204e+06	0.105818	1.54291e+06	0.095712	4.445e+06	0.140676	1.53261e+06
224-39	0.122156	3.03086e+06	0.0992908	3.77611e+06	0.142756	1.38233e+06	0.0604605	1.22888e+06	0.113355	5.66362e+06	0.124855	1.14683e+06	0.114269	1.30203e+06	0.103795	4.3045e+06	0.149606	2.24087e+06
224-4	0.107544	2.5259e+06	0.0863251	3.26758e+06	0.131366	1.75293e+06	0.0764756	1.5351e+06	0.0997978	6.30693e+06	0.122655	1.64472e+06	0.100652	1.70425e+06	0.0980259	5.13406e+06	0.0870252	2.82113e+06
224-40	0.10706	1.27348e+06	0.0921219	2.13407e+06	0.128622	1.25343e+06	0.0731796	1.44946e+06	0.104463	4.68993e+06	0.127966	1.1546e+06	0.111319	1.32233e+06	0.0954714	3.6737e+06	0.137868	917395
224-41	0.111275	1.2377e+06	0.0839082	1.97788e+06	0.147632	933102	0.0779563	559273	0.110313	3.70231e+06	0.114869	633956	0.121932	1.03871e+06	0.102738	3.28908e+06	0.127378	1.02424e+06
224-42	0.113076	2.52818e+06	0.0788979	2.79899e+06	0.125697	1.79306e+06	0.0673542	1.56302e+06	0.10116	6.22055e+06	0.108515	1.87502e+06	0.103946	1.51783e+06	0.100041	4.65304e+06	0.126216	1.95961e+06
224-43	0.13714	1.52701e+06	0.0855372	2.10612e+06	0.14355	1.47465e+06	0.0792566	1.67551e+06	0.110965	4.54925e+06	0.12114	1.35558e+06	0.115192	1.31884e+06	0.11485	3.34482e+06	0.117788	1.29829e+06
224-44	0.109071	1.75138e+06	0.0828158	2.89832e+06	0.128014	1.87794e+06	0.0688394	1.79637e+06	0.100058	6.57864e+06	0.109741	1.75391e+06	0.101246	1.74539e+06	0.100377	4.55043e+06	0.130705	1.88644e+06
224-46	0.111068	2.11182e+06	0.0759176	2.06257e+06	0.12267	2.20988e+06	0.0722121	2.02549e+06	0.106357	6.81435e+06	0.106981	2.13258e+06	0.0988741	1.80957e+06	0.0992479	5.11302e+06	0.111041	1.32317e+06
224-5	0.115352	2.04391e+06	0.0824819	2.4708e+06	0.13441	1.56302e+06	0.0758589	2.4131e+06	0.109139	5.4402e+06	0.126055	1.7415e+06	0.104897	1.72945e+06	0.1051	4.34917e+06	0.0846314	2.28849e+06
224-51	0.133541	1.37078e+06	0.0765954	1.82451e+06	0.151478	928247	0.0853191	898462	0.106309	4.28039e+06	0.130788	712202	0.121026	820507	0.103673	3.56142e+06	0.140503	1.20202e+06
224-52	0.112734	2.43644e+06	0.0833147	3.10592e+06	0.131942	1.28726e+06	0.0706146	1.4365e+06	0.101173	5.19899e+06	0.111622	1.02908e+06	0.111092	1.46206e+06	0.0998563	4.32517e+06	0.128536	1.26631e+06
224-53	0.114183	1.46377e+06	0.0886451	2.35369e+06	0.120888	1.18684e+06	0.0806555	808092	0.10782	4.21166e+06	0.131352	1.02399e+06	0.11884	1.2372e+06	0.0984852	4.15883e+06	0.106567	1.42517e+06
224-55	0.12046	1.82541e+06	0.0915749	2.18682e+06	0.125744	1.52377e+06	0.0618618	1.91122e+06	0.116877	5.26977e+06	0.135162	1.3977e+06	0.116591	1.49317e+06	0.111944	3.47731e+06	0.101801	1.87609e+06
224-56	0.113771	1.63468e+06	0.0895799	2.20829e+06	0.106073	1.96907e+06	0.0584423	2.17524e+06	0.106835	5.53702e+06	0.115788	1.69574e+06	0.0966891	1.69037e+06	0.110971	3.74693e+06	0.10342	2.42958e+06
224-57	0.114509	2.11519e+06	0.0901022	2.12509e+06	0.115119	1.76253e+06	0.0585603	1.93581e+06	0.108008	5.22017e+06	0.12487	1.55885e+06	0.104528	1.45739e+06	0.0986518	4.36168e+06	0.104958	2.03232e+06
224-59	0.109622	1.90613e+06	0.0955278	2.01728e+06	0.118469	1.40849e+06	0.0687917	2.04128e+06	0.105865	4.50555e+06	0.127822	966387	0.112151	1.33087e+06	0.101777	3.92031e+06	0.110208	1.79827e+06
224-6	0.103932	3.49008e+06	0.0824625	3.08878e+06	0.115754	2.49266e+06	0.0742516	1.85388e+06	0.0939153	7.68297e+06	0.115024	2.23424e+06	0.092406	2.60534e+06	0.0956416	6.57301e+06	0.0811723	2.72632e+06
224-60	0.104564	2.61365e+06	0.0908367	2.29632e+06	0.105658	1.9219e+06	0.0706886	1.66279e+06	0.0972652	6.40584e+06	0.127904	1.18944e+06	0.110775	1.3884e+06	0.0937254	5.94774e+06	0.105285	2.32968e+06
224-61	0.125043	2.24167e+06	0.0930957	2.37766e+06	0.122057	1.47853e+06	0.0728852	1.59807e+06	0.11079	5.09479e+06	0.133611	1.3577e+06	0.110911	1.35647e+06	0.102756	4.08748e+06	0.107898	2.33963e+06
224-62	0.113679	2.06416e+06	0.0863574	2.44246e+06	0.109629	1.94643e+06	0.060428	1.82742e+06	0.0992908	6.01099e+06	0.121364	1.75768e+06	0.105809	2.06936e+06	0.0980383	4.88066e+06	0.101919	2.08562e+06
224-63	0.115577	1.34427e+06	0.100754	2.48545e+06	0.130588	1.08258e+06	0.0787937	1.41985e+06	0.109209	4.78492e+06	0.132277	967798	0.120143	1.11519e+06	0.105325	3.56249e+06	0.0940642	1.54512e+06
224-64	0.103067	1.11143e+06	0.0866518	1.6967e+06	0.113406	1.16255e+06	0.05651	1.74584e+06	0.106723	4.60572e+06	0.123433	1.04958e+06	0.11461	1.25262e+06	0.0991655	4.03224e+06	0.0971874	1.41404e+06
224-65	0.120651	1.51278e+06	0.0867371	2.22133e+06	0.116325	1.34778e+06	0.0600186	1.39232e+06	0.111256	5.15988e+06	0.120203	1.20912e+06	0.115463	1.33117e+06	0.105402	3.77776e+06	0.104587	1.89412e+06
224-66	0.107885	2.31755e+06	0.0830744	2.41659e+06	0.108152	2.23309e+06	0.0731619	1.72362e+06	0.0997312	6.40501e+06	0.109198	1.93335e+06	0.104227	2.03635e+06	0.0969301	5.02525e+06	0.0968584	2.12223e+06
224-67	0.126888	1.56996e+06	0.0876528	2.15415e+06	0.131569	1.11897e+06	0.0817982	1.20687e+06	0.109341	4.0225e+06	0.118488	882988	0.122302	1.16486e+06	0.103587	3.55062e+06	0.104943	1.77624e+06
224-68	0.103375	1.93421e+06	0.0824755	1.57075e+06	0.113639	1.17634e+06	0.0667858	1.30085e+06	0.104451	5.03488e+06	0.120187	1.25703e+06	0.112171	1.3935e+06	0.0982478	4.04401e+06	0.098034	1.56701e+06
224-69	0.111711	1.93387e+06	0.0850808	2.33317e+06	0.116575	1.5977e+06	0.0590436	887986	0.106097	5.23332e+06	0.117517	1.19058e+06	0.110782	1.36549e+06	0.102016	3.80709e+06	0.100447	1.90667e+06
224-7	0.125518	1.9839e+06	0.0927562	2.98785e+06	0.140529	1.47653e+06	0.0785255	1.50273e+06	0.108636	4.96578e+06	0.12397	1.38166e+06	0.109407	1.60152e+06	0.105795	4.17977e+06	0.0827149	1.92174e+06
224-70	0.101167	3.18071e+06	0.0931593	3.00599e+06	0.102971	2.28901e+06	0.0620557	1.8312e+06	0.086861	7.09753e+06	0.106203	1.33588e+06	0.0978928	1.87096e+06	0.0931355	6.35957e+06	0.106654	2.30403e+06
224-71	0.125479	2.47068e+06	0.0829407	2.5366e+06	0.120744	1.74531e+06	0.0755328	1.5994e+06	0.105198	5.83788e+06	0.120309	1.49226e+06	0.113203	1.5215e+06	0.103793	4.50382e+06	0.106449	2.60937e+06
224-72	0.109209	3.29035e+06	0.0773336	2.7251e+06	0.101882	2.47312e+06	0.060524	1.46635e+06	0.0900543	7.87697e+06	0.104598	2.45742e+06	0.0973906	2.31569e+06	0.0898539	6.22979e+06	0.0900619	2.31114e+06
224-73	0.116857	2.02878e+06	0.0767957	2.00615e+06	0.125899	1.57697e+06	0.0676347	1.63293e+06	0.111181	4.79776e+06	0.126695	1.53169e+06	0.114421	1.12312e+06	0.105463	3.83532e+06	0.0948678	1.53929e+06
224-74	0.111197	2.38217e+06	0.079481	2.44145e+06	0.106008	2.19527e+06	0.0661436	1.79611e+06	0.101101	6.45004e+06	0.110378	1.84457e+06	0.101884	1.92685e+06	0.0989479	4.83407e+06	0.0955225	2.40036e+06
224-75	0.117051	2.20116e+06	0.0816114	2.03935e+06	0.131291	1.05798e+06	0.074773	1.28789e+06	0.110789	4.71044e+06	0.138073	1.03941e+06	0.125223	1.14141e+06	0.102807	3.93479e+06	0.112215	2.09984e+06
224-77	0.123856	2.14159e+06	0.090111	2.17556e+06	0.125512	1.7719e+06	0.0772693	1.72648e+06	0.104978	5.14595e+06	0.114136	1.25252e+06	0.107726	1.44357e+06	0.103238	4.06072e+06	0.0863808	2.54647e+06
224-78	0.111584	2.21239e+06	0.094211	2.30396e+06	0.10943	1.81396e+06	0.0687336	1.9474e+06	0.100797	5.31738e+06	0.112579	1.55972e+06	0.10192	1.83291e+06	0.0994149	4.40492e+06	0.0897113	2.66444e+06
224-8	0.10351	2.42929e+06	0.082376	2.60732e+06	0.124038	1.88934e+06	0.0588339	2.17499e+06	0.0911405	7.20468e+06	0.124146	1.74562e+06	0.101046	1.79455e+06	0.0850257	7.36649e+06	0.0864672	1.91508e+06
224-80	0.10453	2.00634e+06	0.0903679	2.45032e+06	0.111394	2.12701e+06	0.0648441	1.35869e+06	0.101105	5.67268e+06	0.116521	1.86777e+06	0.101335	1.87654e+06	0.0988849	4.598e+06	0.0882559	2.8927e+06
224-81	0.115548	2.034e+06	0.0991913	2.50503e+06	0.118447	1.52727e+06	0.0773102	1.17204e+06	0.108689	4.67693e+06	0.121678	1.26983e+06	0.106268	1.12257e+06	0.114847	3.44527e+06	0.0966949	2.60397e+06
224-82	0.100653	2.96962e+06	0.0914172	3.63029e+06	0.10195	2.56316e+06	0.0847216	2.14046e+06	0.0918433	7.82846e+06	0.10288	2.02171e+06	0.0946217	2.49944e+06	0.0886936	6.69515e+06	0.0878153	2.69881e+06
224-83	0.122115	2.35934e+06	0.0946322	2.49157e+06	0.120573	1.8729e+06	0.0776591	1.75953e+06	0.103556	4.7316e+06	0.113722	1.34651e+06	0.107971	1.75367e+06	0.104563	4.12312e+06	0.0880446	2.32759e+06
224-84	0.095805	3.04376e+06	0.0852675	3.4434e+06	0.10536	2.72917e+06	0.0573322	1.16222e+06	0.0945845	8.3022e+06	0.109538	2.25891e+06	0.0929226	1.85663e+06	0.090694	6.81041e+06	0.0831652	3.07814e+06
224-85	0.115571	1.91812e+06	0.0878679	1.78885e+06	0.123078	1.41816e+06	0.0734034	1.56251e+06	0.109067	3.8855e+06	0.123415	1.22716e+06	0.116303	1.40507e+06	0.108602	3.51849e+06	0.0900235	2.3776e+06
224-86	0.107167	2.49646e+06	0.0942948	2.59803e+06	0.111423	1.81045e+06	0.0603914	1.11197e+06	0.0989995	5.49351e+06	0.109541	1.45118e+06	0.102036	1.75848e+06	0.100982	4.3626e+06	0.0853214	2.69521e+06
224-9	0.117627	1.79147e+06	0.0789054	2.08077e+06	0.146406	1.40414e+06	0.0623186	1.33368e+06	0.111262	5.07915e+06	0.133558	1.45268e+06	0.113335	1.37833e+06	0.106399	4.1461e+06	0.0884947	2.24617e+06
227-1	0.0905428	2.43419e+06	0.067449	2.2461e+06	0.115265	2.30671e+06	0.0725472	1.78476e+06	0.0705157	3.72075e+06	0.10322	1.78173e+06	0.0888048	1.78375e+06	0.0930071	5.62792e+06	0.0793187	2.13165e+06
227-10	0.110103	1.82711e+06	0.0662195	1.98897e+06	0.133393	1.53024e+06	0.0592443	1.57663e+06	0.0824987	2.70038e+06	0.114118	1.81732e+06	0.104195	1.57435e+06	0.0958338	3.89349e+06	0.0805361	1.64486e+06
227-11	0.0896443	2.79837e+06	0.0656401	2.38054e+06	0.117071	2.56269e+06	0.0751282	2.26127e+06	0.075375	3.68256e+06	0.104912	2.35669e+06	0.0916764	2.04731e+06	0.0865428	5.6228e+06	0.0821667	2.44746e+06
227-120	0.123709	950818	0.0702133	1.11866e+06	0.123886	1.14385e+06	0.0728365	559528	0.112675	4.48562e+06	0.122101	952209	0.114198	1.09549e+06	0.101479	3.28182e+06	0.0912064	1.09705e+06
227-121	0.0930704	2.75958e+06	0.0732871	2.17655e+06	0.104218	2.25706e+06	0.0564544	1.44311e+06	0.0789726	2.96989e+06	0.10715	1.82484e+06	0.106776	1.79986e+06	0.0919843	5.49365e+06	0.0828527	2.13179e+06
227-122	0.113058	1.58686e+06	0.0729143	2.0484e+06	0.120812	1.75094e+06	0.0843955	1.66747e+06	0.0829948	2.07287e+06	0.115249	1.27371e+06	0.114753	1.3286e+06	0.103648	3.78026e+06	0.090549	2.15182e+06
227-123	0.0866178	1.93553e+06	0.0657867	1.598e+06	0.10343	2.64416e+06	0.0467102	1.64802e+06	0.0841406	3.74486e+06	0.11689	2.0235e+06	0.106007	1.97262e+06	0.0940895	5.06512e+06	0.0752726	1.6194e+06
227-124	0.102185	2.00222e+06	0.0765523	1.84515e+06	0.122736	1.26651e+06	0.0752233	1.44218e+06	0.10486	5.99972e+06	0.12948	1.17944e+06	0.124135	1.16913e+06	0.0968643	3.68545e+06	0.0916578	1.78755e+06
227-126	0.0960471	1.52179e+06	0.0720597	1.41224e+06	0.115119	1.39783e+06	0.0765846	1.27098e+06	0.0853029	2.88978e+06	0.120964	1.33314e+06	0.113763	933723	0.0937937	3.94185e+06	0.0863342	1.3391e+06
227-127	0.113517	2.10817e+06	0.0648603	1.54879e+06	0.127387	1.89907e+06	0.053362	1.78028e+06	0.110304	5.77735e+06	0.119395	1.58519e+06	0.114177	1.51158e+06	0.0987679	3.64491e+06	0.0815723	1.52019e+06
227-128	0.0984722	2.11096e+06	0.0699524	1.57725e+06	0.111765	1.91167e+06	0.0465812	1.20928e+06	0.0815547	2.26257e+06	0.122682	1.39896e+06	0.115503	1.53307e+06	0.0939569	4.11592e+06	0.0841697	1.58475e+06
227-129	0.102967	1.3565e+06	0.0820116	1.64198e+06	0.129945	996363	0.0752561	1.3936e+06	0.0908691	2.07261e+06	0.135131	1.15001e+06	0.131372	896197	0.0985485	3.27964e+06	0.0938882	1.54536e+06
227-13	0.110398	1.40943e+06	0.0609267	1.54201e+06	0.13037	1.42917e+06	0.0653333	1.70856e+06	0.0819104	2.37573e+06	0.113779	1.67339e+06	0.10017	1.32614e+06	0.116434	3.4817e+06	0.0793807	1.67355e+06
227-130	0.09839	3.1682e+06	0.0721481	2.13403e+06	0.104777	2.45833e+06	0.0725702	1.93487e+06	0.0785883	2.81573e+06	0.109303	1.60681e+06	0.109675	1.96224e+06	0.0933354	5.45121e+06	0.0884672	2.69374e+06
227-131	0.103394	1.94968e+06	0.0682836	1.61209e+06	0.118761	1.70485e+06	0.0554324	1.68912e+06	0.0866727	1.97614e+06	0.1163	1.40545e+06	0.1126	1.31531e+06	0.101827	3.72129e+06	0.083145	1.53681e+06
227-132	0.0953092	3.55385e+06	0.0673947	2.26446e+06	0.102322	2.87547e+06	0.0702079	2.06113e+06	0.0753517	3.52234e+06	0.114446	2.16132e+06	0.0994494	2.31777e+06	0.0975239	6.09855e+06	0.0799864	2.45945e+06
227-133	0.0999411	1.69495e+06	0.0758138	1.9311e+06	0.122867	1.72059e+06	0.0773896	1.56985e+06	0.106893	5.84107e+06	0.130796	1.25915e+06	0.114015	1.00371e+06	0.099107	3.77293e+06	0.0832626	1.40193e+06
227-14	0.0867636	3.12685e+06	0.0689441	2.86495e+06	0.117107	2.58439e+06	0.0596686	1.92117e+06	0.0762484	4.52688e+06	0.104014	2.14792e+06	0.0951425	2.1056e+06	0.102783	6.08362e+06	0.0739709	2.19951e+06
227-15	0.107621	1.44652e+06	0.0713936	1.30318e+06	0.134067	1.31616e+06	0.0642806	1.48289e+06	0.0807718	2.58185e+06	0.118006	1.15991e+06	0.113596	813436	0.0990213	3.77746e+06	0.0904973	1.75004e+06
227-16	0.0932635	2.60136e+06	0.0705475	1.70127e+06	0.115227	2.30884e+06	0.0667	1.34811e+06	0.0739845	2.95829e+06	0.106324	1.83482e+06	0.104684	2.07037e+06	0.103804	5.21914e+06	0.0843805	2.07629e+06
227-17	0.109861	1.79179e+06	0.0733171	1.65237e+06	0.132127	1.61374e+06	0.0640376	1.48209e+06	0.083701	2.47412e+06	0.113071	1.38135e+06	0.107165	1.66292e+06	0.106085	3.50845e+06	0.0812763	1.88809e+06
227-18	0.101167	2.07783e+06	0.0720217	1.67999e+06	0.124029	1.88133e+06	0.0617567	1.67995e+06	0.08192	2.74816e+06	0.108807	1.51621e+06	0.101013	1.85425e+06	0.104043	3.82739e+06	0.0789395	2.04053e+06
227-19	0.113391	1.57835e+06	0.0629245	972131	0.1402	1.23976e+06	0.0748107	1.28819e+06	0.0791887	2.26356e+06	0.124559	1.0515e+06	0.121147	841834	0.0980167	3.57497e+06	0.0831166	1.40435e+06
227-21	0.0997526	1.57185e+06	0.0764167	800883	0.12299	1.4499e+06	0.0536798	986234	0.0932361	5.35683e+06	0.112476	1.12713e+06	0.10453	944161	0.0976406	3.69636e+06	0.0777142	804455
227-22	0.10891	2.12377e+06	0.0633614	1.51986e+06	0.136323	1.72273e+06	0.0683278	1.68757e+06	0.113693	5.55499e+06	0.116805	1.62213e+06	0.110393	1.71543e+06	0.105241	3.30187e+06	0.0785296	1.93126e+06
227-24	0.0944514	1.27876e+06	0.0668243	814530	0.114898	2.18832e+06	0.0735278	1.19447e+06	0.083858	2.6196e+06	0.105087	1.68541e+06	0.103992	1.6177e+06	0.0976486	3.52292e+06	0.0881527	1.71907e+06
227-25	0.103146	1.43135e+06	0.0635796	1.14191e+06	0.129781	1.58015e+06	0.0597399	1.20399e+06	0.103944	6.16761e+06	0.117453	1.46571e+06	0.0987081	1.23811e+06	0.0958271	3.34136e+06	0.0763907	1.53913e+06
227-26	0.0917793	2.9006e+06	0.0734033	2.03295e+06	0.115501	2.28559e+06	0.0759568	1.29395e+06	0.0796629	3.91873e+06	0.107884	1.48195e+06	0.103081	2.00843e+06	0.097442	6.2134e+06	0.0749599	1.71847e+06
227-27	0.103479	1.80502e+06	0.0697723	1.679e+06	0.128819	1.64355e+06	0.0756803	1.5215e+06	0.107198	6.13272e+06	0.113927	1.54555e+06	0.106185	1.68235e+06	0.109009	3.7483e+06	0.0851323	2.14002e+06
227-28	0.0907638	3.40096e+06	0.0825592	2.3828e+06	0.123546	1.96309e+06	0.0747065	1.57839e+06	0.0912635	8.1283e+06	0.114768	1.62922e+06	0.102057	1.7761e+06	0.0935117	5.34896e+06	0.120181	1.46249e+06
227-29	0.0991486	1.70612e+06	0.0843466	1.6833e+06	0.13796	1.0932e+06	0.0611975	1.04118e+06	0.0811839	1.98687e+06	0.123975	1.23127e+06	0.114326	1.19394e+06	0.0921633	3.34029e+06	0.11607	1.07717e+06
227-3	0.095068	2.9557e+06	0.0718953	1.77509e+06	0.120273	2.29476e+06	0.0752175	1.79826e+06	0.0764501	3.35149e+06	0.106649	1.85062e+06	0.0971206	2.078e+06	0.0998389	4.86053e+06	0.0831386	2.36565e+06
227-30	0.0913764	2.50435e+06	0.0754189	1.91657e+06	0.121887	2.13663e+06	0.0565476	1.34914e+06	0.080276	2.59173e+06	0.109121	1.46147e+06	0.097076	1.66073e+06	0.102344	5.02039e+06	0.0942806	1.32039e+06
227-32	0.108887	1.55324e+06	0.0807289	1.7092e+06	0.131664	1.42472e+06	0.068789	1.20859e+06	0.110526	4.29202e+06	0.119606	1.22522e+06	0.10565	1.21774e+06	0.098386	3.50061e+06	0.116264	1.43442e+06
227-33	0.109511	1.55344e+06	0.0709654	1.9743e+06	0.123824	1.88673e+06	0.0545377	1.7836e+06	0.0791648	2.53482e+06	0.10758	1.94262e+06	0.0980723	1.78333e+06	0.10087	3.97317e+06	0.0999849	1.46939e+06
227-34	0.100544	2.44702e+06	0.0729802	2.29203e+06	0.135533	1.65516e+06	0.0632872	1.49047e+06	0.0923296	2.47081e+06	0.115143	1.80455e+06	0.10997	1.69217e+06	0.101202	4.14989e+06	0.117478	1.99698e+06
227-35	0.0962082	1.62443e+06	0.0819741	2.09124e+06	0.13038	1.58353e+06	0.0807649	1.65697e+06	0.0769484	2.27658e+06	0.113848	1.3327e+06	0.101979	1.33678e+06	0.103057	3.37236e+06	0.111024	1.43242e+06
227-36	0.117226	1.6799e+06	0.0748919	1.64093e+06	0.136414	1.34089e+06	0.0715029	1.71908e+06	0.0785622	1.9431e+06	0.123612	1.3007e+06	0.114695	1.31819e+06	0.110783	2.90376e+06	0.104597	1.28674e+06
227-37	0.0891007	2.3773e+06	0.074371	2.28218e+06	0.116187	2.34917e+06	0.0579035	2.05886e+06	0.0801621	3.24787e+06	0.103768	2.16661e+06	0.0945551	2.17793e+06	0.099929	4.70545e+06	0.11354	2.01955e+06
227-38	0.0987971	1.2811e+06	0.0721277	1.21436e+06	0.133373	1.27379e+06	0.0652631	982614	0.0833722	1.94319e+06	0.121989	1.17097e+06	0.112692	1.11317e+06	0.0964608	3.07901e+06	0.120024	1.1465e+06
227-39	0.0973564	4.34872e+06	0.0810933	4.52693e+06	0.118882	2.40435e+06	0.0690575	1.9553e+06	0.0841632	3.61043e+06	0.107231	2.17978e+06	0.0960874	2.04718e+06	0.0945775	7.11214e+06	0.11219	2.12166e+06
227-4	0.0998867	1.57923e+06	0.0686359	2.03068e+06	0.135916	1.37795e+06	0.0648638	1.49652e+06	0.103469	6.92253e+06	0.116845	1.29277e+06	0.104346	1.29897e+06	0.101926	3.90901e+06	0.0860151	2.0892e+06
227-40	0.109852	975254	0.0809133	1.38587e+06	0.137489	1.18642e+06	0.072434	865199	0.086553	1.73639e+06	0.122297	1.27044e+06	0.114647	1.17874e+06	0.0972233	2.71649e+06	0.117616	708289
[truncated: 5,313 more rows]
